# Supplementary material for: Modelling and predicting liquid chromatography retention time for PFAS with no-code machine learning
Source: Royal Society of Chemistry journal article supplement (doi:10.1039/d3va00242j), 2023-12-01
Supplement: d3va00242j1.xlsx [file d3va00242j1.xlsx]

## Sheet: SI head page and Figures
Supporting Information (SI) for “Modelling and Predicting Liquid Chromatography Retention Time for PFAS with no-code Machine Learning” Yunwu Fan1, Yu Deng1, Yi Yang1, Xin Deng1, Qianhui Li1, Boqi Xu1, Jianyu Pan1, Sisi Liu1,2, Yan Kong3 and Chang-Er Chen 1, 2* 1. School of Environment, MOE Key Laboratory of Theoretical Chemistry of Environment, South China Normal University, Guangzhou 510006, Chi…
T
Figure S1. The Orange supports multiple windows open at the same time that can observe the changes of metrics while adjusting parameters.
Figure S2. The top 15 features selected by Lasso model in terms of R2 score in the “Feature Importance” widget.
Figure S3. Distribution of the measured RTs, ATSC2i, and MWC10 (0 – blue: all PFAS without measured RTs; 1 – red: all PFAS with measured RTs) of PFAS studied.

## Sheet: Table S1 TrainingPFAS58
Table S1. Training Set of the PFAS with CAS number, SMILES and LC retention time in second (RT).
ID	Name	CAS	SMILES_PubChem	RT(s)
1	PFBA	375-22-4	O=C(O)C(F)(F)C(F)(F)C(F)(F)F	129
2	PFPeA	2706-90-3	O=C(O)C(F)(F)C(F)(F)C(F)(F)C(F)(F)F	159
3	PFHxA	307-24-4	O=C(O)C(F)(F)C(F)(F)C(F)(F)C(F)(F)C(F)(F)F	187
4	PFHpA	375-85-9	O=C(O)C(F)(F)C(F)(F)C(F)(F)C(F)(F)C(F)(F)C(F)(F)F	208
5	PFOA	335-67-1	O=C(O)C(F)(F)C(F)(F)C(F)(F)C(F)(F)C(F)(F)C(F)(F)C(F)(F)F	226
6	PFNA	375-95-1	O=C(O)C(F)(F)C(F)(F)C(F)(F)C(F)(F)C(F)(F)C(F)(F)C(F)(F)C(F)(F)F	243
7	PFDA	335-76-2	O=C(O)C(F)(F)C(F)(F)C(F)(F)C(F)(F)C(F)(F)C(F)(F)C(F)(F)C(F)(F)C(F)(F)F	259
8	PFUnDA	2058-94-8	OC(=O)C(F)(F)C(F)(F)C(F)(F)C(F)(F)C(F)(F)C(F)(F)C(F)(F)C(F)(F)C(F)(F)C(F)(F)F	274
9	PFDoDA	307-55-1	O=C(O)C(F)(F)C(F)(F)C(F)(F)C(F)(F)C(F)(F)C(F)(F)C(F)(F)C(F)(F)C(F)(F)C(F)(F)C(F)(F)F	289
10	PFTrDA	72629-94-8	O=C(O)C(F)(F)C(F)(F)C(F)(F)C(F)(F)C(F)(F)C(F)(F)C(F)(F)C(F)(F)C(F)(F)C(F)(F)C(F)(F)C(F)(F)F	303
11	PFTeDA	376-06-7	O=C(O)C(F)(F)C(F)(F)C(F)(F)C(F)(F)C(F)(F)C(F)(F)C(F)(F)C(F)(F)C(F)(F)C(F)(F)C(F)(F)C(F)(F)C(F)(F)F	316
12	PFHxDA	67905-19-5	O=C(O)C(F)(F)C(F)(F)C(F)(F)C(F)(F)C(F)(F)C(F)(F)C(F)(F)C(F)(F)C(F)(F)C(F)(F)C(F)(F)C(F)(F)C(F)(F)C(F)(F)C(F)(F)F	341
13	PFODA	16517-11-6	O=C(O)C(F)(F)C(F)(F)C(F)(F)C(F)(F)C(F)(F)C(F)(F)C(F)(F)C(F)(F)C(F)(F)C(F)(F)C(F)(F)C(F)(F)C(F)(F)C(F)(F)C(F)(F)C(F)(F)C(F)(F)F	364
14	FHEA	53826-12-3	C(C(=O)O)C(C(C(C(C(C(F)(F)F)(F)F)(F)F)(F)F)(F)F)(F)F	215
15	FOEA	27854-31-5	C(C(=O)O)C(C(C(C(C(C(C(C(F)(F)F)(F)F)(F)F)(F)F)(F)F)(F)F)(F)F)(F)F	237
16	FDEA	53826-13-4	C(C(=O)O)C(C(C(C(C(C(C(C(C(C(F)(F)F)(F)F)(F)F)(F)F)(F)F)(F)F)(F)F)(F)F)(F)F)(F)F	268
17	FHUEA	70887-88-6	C(=C(/C(C(C(C(C(F)(F)F)(F)F)(F)F)(F)F)(F)F)\F)\C(=O)O	201
18	FOUEA	70887-84-2	C(=C(/C(C(C(C(C(C(C(F)(F)F)(F)F)(F)F)(F)F)(F)F)(F)F)(F)F)\F)\C(=O)O	236
19	FDUEA	70887-94-4	C(=C(C(C(C(C(C(C(C(C(C(F)(F)F)(F)F)(F)F)(F)F)(F)F)(F)F)(F)F)(F)F)(F)F)F)C(=O)O	267
20	FPrPA	356-02-5	C(CC(C(C(F)(F)F)(F)F)(F)F)C(=O)O	146
21	FPePA	914637-49-3	C(CC(C(C(C(C(F)(F)F)(F)F)(F)F)(F)F)(F)F)C(=O)O	200
22	FHpPA	812-70-4	C(CC(C(C(C(C(C(C(F)(F)F)(F)F)(F)F)(F)F)(F)F)(F)F)(F)F)C(=O)O	239
23	ADONA	919005-14-4	OC(=O)C(F)(F)C(F)OC(F)(F)C(F)(F)C(F)(F)OC(F)(F)F	215
24	HFPO-DA	13252-13-6	C(=O)(C(C(F)(F)F)(OC(C(C(F)(F)F)(F)F)(F)F)F)O	194
25	HFPO-TA	13252-14-7	C(=O)(C(C(F)(F)F)(OC(C(C(F)(F)F)(OC(C(C(F)(F)F)(F)F)(F)F)F)(F)F)F)O	251
26	PFBS	375-73-5	O=S(=O)(O)C(F)(F)C(F)(F)C(F)(F)C(F)(F)F	185
27	PFPeS	2706-91-4	O=S(=O)(O)C(F)(F)C(F)(F)C(F)(F)C(F)(F)C(F)(F)F	209
28	PFHxS	355-46-4	O=S(=O)(O)C(F)(F)C(F)(F)C(F)(F)C(F)(F)C(F)(F)C(F)(F)F	229
29	PFHpS	375-92-8	O=S(=O)(O)C(F)(F)C(F)(F)C(F)(F)C(F)(F)C(F)(F)C(F)(F)C(F)(F)F	247
30	PFOS	1763-23-1	O=S(=O)(O)C(F)(F)C(F)(F)C(F)(F)C(F)(F)C(F)(F)C(F)(F)C(F)(F)C(F)(F)F	263
31	PFNS	68259-12-1	O=S(=O)(O)C(F)(F)C(F)(F)C(F)(F)C(F)(F)C(F)(F)C(F)(F)C(F)(F)C(F)(F)C(F)(F)F	278
32	PFDS	335-77-3	O=S(=O)(O)C(F)(F)C(F)(F)C(F)(F)C(F)(F)C(F)(F)C(F)(F)C(F)(F)C(F)(F)C(F)(F)C(F)(F)F	293
33	PFDoS	79780-39-5	C(C(C(C(C(C(C(F)(F)S(=O)(=O)O)(F)F)(F)F)(F)F)(F)F)(F)F)(C(C(C(C(C(F)(F)F)(F)F)(F)F)(F)F)(F)F)(F)F	320
34	4:2FTS	757124-72-4	C(CS(=O)(=O)O)C(C(C(C(F)(F)F)(F)F)(F)F)(F)F	179
35	6:2FTS	27619-97-2	O=S(=O)(O)CCC(F)(F)C(F)(F)C(F)(F)C(F)(F)C(F)(F)C(F)(F)F	219
36	8:2FTS	39108-34-4	S(=O)(=O)(O)CCC(F)(F)C(F)(F)C(F)(F)C(F)(F)C(F)(F)C(F)(F)C(F)(F)C(F)(F)F	252
37	10:2FTS	120226-60-0	FC(F)(CCS(O)(=O)=O)C(F)(F)C(F)(F)C(F)(F)C(F)(F)C(F)(F)C(F)(F)C(F)(F)C(F)(F)C(F)(F)F	282
38	PFECHS	1135682-88-0	C1(C(C(C(C(C1(F)F)(F)F)(F)F)(F)F)(F)F)(C(C(F)(F)F)(F)F)S(=O)(=O)O	245
39	6:2 Cl-PFESA	756426-58-1	OS(=O)(=O)C(F)(F)C(F)(F)OC(F)(F)C(F)(F)C(F)(F)C(F)(F)C(F)(F)C(F)(F)Cl	274
40	8:2 Cl-PFESA	763051-92-9	OS(=O)(=O)C(F)(F)C(F)(F)OC(F)(F)C(F)(F)C(F)(F)C(F)(F)C(F)(F)C(F)(F)C(F)(F)C(F)(F)Cl	304
41	FOSA	754-91-6	NS(=O)(=O)C(F)(F)C(F)(F)C(F)(F)C(F)(F)C(F)(F)C(F)(F)C(F)(F)C(F)(F)F	313
42	N-MeFOSA-M	31506-32-8	O=S(=O)(NC)C(F)(F)C(F)(F)C(F)(F)C(F)(F)C(F)(F)C(F)(F)C(F)(F)C(F)(F)F	365
43	N-EtFOSA-M	4151-50-2	O=S(=O)(NCC)C(F)(F)C(F)(F)C(F)(F)C(F)(F)C(F)(F)C(F)(F)C(F)(F)C(F)(F)F	377
44	FOSAA	2806-24-8	C(C(=O)O)NS(=O)(=O)C(C(C(C(C(C(C(C(F)(F)F)(F)F)(F)F)(F)F)(F)F)(F)F)(F)F)(F)F	253
45	N-MeFOSAA	2355-31-9	CN(CC(=O)O)S(=O)(=O)C(C(C(C(C(C(C(C(F)(F)F)(F)F)(F)F)(F)F)(F)F)(F)F)(F)F)(F)F	260
46	N-EtFOSAA	2991-50-6	O=C(O)CN(S(=O)(=O)C(F)(F)C(F)(F)C(F)(F)C(F)(F)C(F)(F)C(F)(F)C(F)(F)C(F)(F)F)CC	267
47	N-MeFOSE-M	24448-09-7	O=S(=O)(N(CCO)C)C(F)(F)C(F)(F)C(F)(F)C(F)(F)C(F)(F)C(F)(F)C(F)(F)C(F)(F)F	361
48	N-EtFOSE-M	1691-99-2	O=S(=O)(N(CCO)CC)C(F)(F)C(F)(F)C(F)(F)C(F)(F)C(F)(F)C(F)(F)C(F)(F)C(F)(F)F	374
49	PFHxPA	40143-76-8	FC(F)(C(F)(F)P(O)(=O)O)C(F)(F)C(F)(F)C(F)(F)C(F)(F)F	136
50	PFOPA	40143-78-0	FC(F)(C(F)(F)P(O)(=O)O)C(F)(F)C(F)(F)C(F)(F)C(F)(F)C(F)(F)C(F)(F)F	182
51	PFDPA	52299-26-0	C(C(C(C(C(C(F)(F)P(=O)(O)O)(F)F)(F)F)(F)F)(F)F)(C(C(C(C(F)(F)F)(F)F)(F)F)(F)F)(F)F	216
52	6:6PFPiA	40143-77-9	C(C(C(C(F)(F)P(=O)(C(C(C(C(C(C(F)(F)F)(F)F)(F)F)(F)F)(F)F)(F)F)O)(F)F)(F)F)(C(C(F)(F)F)(F)F)(F)F	303
53	8:8PFPiA	40143-79-1	C(C(C(C(C(F)(F)P(=O)(C(C(C(C(C(C(C(C(F)(F)F)(F)F)(F)F)(F)F)(F)F)(F)F)(F)F)(F)F)O)(F)F)(F)F)(F)F)(C(C(C(F)(F)F)(F)F)(F)F)(F)F	349
54	6:2diPAP	57677-95-9	C(COP(=O)(O)OCCC(C(C(C(C(C(F)(F)F)(F)F)(F)F)(F)F)(F)F)(F)F)C(C(C(C(C(C(F)(F)F)(F)F)(F)F)(F)F)(F)F)(F)F	301
55	6:2/8:2diPAP	943913-15-3	C(COP(=O)(O)OCCC(C(C(C(C(C(C(F)(F)F)(F)F)(F)F)(F)F)(F)F)(F)F)(F)F)C(C(C(C(C(C(C(F)(F)F)(F)F)(F)F)(F)F)(F)F)(F)F)(F)F	324
56	8:2diPAP	678-41-1	C(COP(=O)(O)OCCC(C(C(C(C(C(C(C(F)(F)F)(F)F)(F)F)(F)F)(F)F)(F)F)(F)F)(F)F)C(C(C(C(C(C(C(C(F)(F)F)(F)F)(F)F)(F)F)(F)F)(F)F)(F)F)(F)F	346
57	diSAmPAP	2965-52-8	O=S(=O)(C(C(C(C(C(C(C(C(F)(F)F)(F)F)(F)F)(F)F)(F)F)(F)F)(F)F)(F)F)N(CCOP(=O)(OCCN(S(=O)(=O)C(C(C(C(C(C(C(C(F)(F)F)(F)F)(F)F)	373
58	Cl-PFOPA	2252239-09-9	FC(F)(C(F)(F)P(O)(=O)O)C(F)(F)C(F)(F)C(F)(F)C(F)(F)C(F)(F)C(F)(F)Cl	188

## Sheet: Table S2 1444Xs
ID	Name	CAS	RTs	nAcid	ALogP	ALogp2	AMR	apol	naAromAtom	nAromBond	nAtom	nHeavyAtom	nH	nB	nC	nN	nO	nS	nP	nF	nCl	nBr	nI	nX	ATS0m	ATS1m	ATS2m	ATS3m	ATS4m	ATS5m	ATS6m	ATS7m	ATS8m	ATS0v	ATS1v	ATS2v	ATS3v	ATS4v	ATS5v	ATS6v	ATS7v	ATS8v	ATS0e	ATS1e	ATS2e	ATS3e	ATS4e	ATS5e	ATS6e
1	PFBA	375-22-4	129	1	1.8415	3.39112	22.9899	13.2098	0	0	14	13	1	0	4	0	2	0	0	7	0	0	0	7	3616.58	2430.58	5255.72	6979.37	4500.76	1874.14	57.4512	0	0	3397.24	3874.81	5680.94	5695.88	3535.23	1437.49	222.55	0	0	175.584	129.048	256.442	339.549	235.337	115.55	31.104
2	PFPeA	2706-90-3	159	1	2.3331	5.44336	27.6579	16.0838	0	0	17	16	1	0	5	0	2	0	0	9	0	0	0	9	4482.73	3031.22	6673.68	9480.15	7001.54	4500.76	1874.14	57.4512	0	4174.85	4845.98	7376.8	7922.88	5762.23	3535.23	1437.49	222.55	0	215.124	158.557	323.919	455.026	350.814	235.337	115.55
3	PFHxA	307-24-4	186.6	1	2.8247	7.97893	32.3259	18.9578	0	0	20	19	1	0	6	0	2	0	0	11	0	0	0	11	5348.87	3631.86	8091.64	11980.9	9502.32	7001.54	4500.76	1874.14	57.4512	4952.45	5817.15	9072.67	10149.9	7989.23	5762.23	3535.23	1437.49	222.55	254.665	188.066	391.395	570.502	466.29	350.814	235.337
4	PFHpA	375-85-9	207.6	1	3.3163	10.9978	36.9939	21.8318	0	0	23	22	1	0	7	0	2	0	0	13	0	0	0	13	6215.01	4232.51	9509.6	14481.7	12003.1	9502.32	7001.54	4500.76	1874.14	5730.06	6788.32	10768.5	12376.9	10216.2	7989.23	5762.23	3535.23	1437.49	294.206	217.574	458.872	685.979	581.767	466.29	350.814
5	PFOA	335-67-1	226.2	1	3.8079	14.5001	41.6619	24.7058	0	0	26	25	1	0	8	0	2	0	0	15	0	0	0	15	7081.15	4833.15	10927.6	16982.5	14503.9	12003.1	9502.32	7001.54	4500.76	6507.66	7759.49	12464.4	14603.9	12443.2	10216.2	7989.23	5762.23	3535.23	333.746	247.083	526.348	801.455	697.243	581.767	466.29
6	PFNA	375-95-1	243	1	4.2995	18.4857	46.3299	27.5798	0	0	29	28	1	0	9	0	2	0	0	17	0	0	0	17	7947.3	5433.79	12345.5	19483.3	17004.7	14503.9	12003.1	9502.32	7001.54	7285.27	8730.66	14160.3	16830.9	14670.2	12443.2	10216.2	7989.23	5762.23	373.287	276.591	593.825	916.932	812.72	697.243	581.767
7	PFDA	335-76-2	258.6	1	4.7911	22.9546	50.9979	30.4538	0	0	32	31	1	0	10	0	2	0	0	19	0	0	0	19	8813.44	6034.44	13763.5	21984.1	19505.4	17004.7	14503.9	12003.1	9502.32	8062.87	9701.83	15856.1	19057.9	16897.2	14670.2	12443.2	10216.2	7989.23	412.827	306.1	661.301	1032.41	928.196	812.72	697.243
8	PFUnDA	2058-94-8	273.6	1	5.2827	27.9069	55.6659	33.3278	0	0	35	34	1	0	11	0	2	0	0	21	0	0	0	21	9679.58	6635.08	15181.5	24484.8	22006.2	19505.4	17004.7	14503.9	12003.1	8840.48	10673	17552	21284.9	19124.2	16897.2	14670.2	12443.2	10216.2	452.368	335.608	728.778	1147.88	1043.67	928.196	812.72
9	PFDoDA	307-55-1	288.6	1	5.7743	33.3425	60.3339	36.2018	0	0	38	37	1	0	12	0	2	0	0	23	0	0	0	23	10545.7	7235.73	16599.4	26985.6	24507	22006.2	19505.4	17004.7	14503.9	9618.08	11644.2	19247.9	23511.9	21351.2	19124.2	16897.2	14670.2	12443.2	491.908	365.117	796.254	1263.36	1159.15	1043.67	928.196
10	PFTrDA	72629-94-8	303	1	6.2659	39.2615	65.0019	39.0758	0	0	41	40	1	0	13	0	2	0	0	25	0	0	0	25	11411.9	7836.37	18017.4	29486.4	27007.8	24507	22006.2	19505.4	17004.7	10395.7	12615.3	20943.7	25738.9	23578.2	21351.2	19124.2	16897.2	14670.2	531.449	394.625	863.731	1378.84	1274.63	1159.15	1043.67
11	PFTeDA	376-06-7	316.2	1	6.7575	45.6638	69.6699	41.9498	0	0	44	43	1	0	14	0	2	0	0	27	0	0	0	27	12278	8437.01	19435.3	31987.2	29508.6	27007.8	24507	22006.2	19505.4	11173.3	13586.5	22639.6	27965.9	25805.2	23578.2	21351.2	19124.2	16897.2	570.989	424.134	931.207	1494.31	1390.1	1274.63	1159.15
12	PFHxDA	67905-19-5	341.4	1	7.7407	59.9184	79.0059	47.6978	0	0	50	49	1	0	16	0	2	0	0	31	0	0	0	31	14010.3	9638.3	22271.3	36988.7	34510.1	32009.4	29508.6	27007.8	24507	12728.5	15528.9	26031.4	32419.9	30259.2	28032.2	25805.2	23578.2	21351.2	650.07	483.151	1066.16	1725.27	1621.06	1505.58	1390.1
13	PFODA	16517-11-6	363.6	1	8.7239	76.1064	88.3419	53.4458	0	0	56	55	1	0	18	0	2	0	0	35	0	0	0	35	15742.6	10839.6	25107.2	41990.3	39511.7	37010.9	34510.1	32009.4	29508.6	14283.7	17471.2	29423.1	36873.9	34713.2	32486.2	30259.2	28032.2	25805.2	729.151	542.168	1201.11	1956.22	1852.01	1736.53	1621.06
14	FHEA	53826-12-3	215.4	1	3.3511	11.2299	41.5431	24.9254	0	0	26	23	3	0	8	0	2	0	0	13	0	0	0	13	6361.31	4400.99	9703.31	14031.9	12668.3	10203.8	7703	5202.22	2450.03	6215.74	7441.31	11682.1	13419.4	11627.4	9486.61	7259.61	5032.61	2918.07	315.183	239.35	501.601	750.615	659.684	551.506	436.03
15	FOEA	27854-31-5	237	1	4.3343	18.7862	50.8791	30.6734	0	0	32	29	3	0	10	0	2	0	0	17	0	0	0	17	8093.59	5602.27	12539.2	19033.4	17669.9	15205.3	12704.6	10203.8	7703	7770.95	9383.65	15073.8	17873.4	16081.4	13940.6	11713.6	9486.61	7259.61	394.264	298.367	636.554	981.568	890.637	782.459	666.983
16	FDEA	53826-13-4	267.6	1	5.3175	28.2758	60.2151	36.4214	0	0	38	35	3	0	12	0	2	0	0	21	0	0	0	21	9825.88	6803.56	15375.2	24035	22671.4	20206.9	17706.1	15205.3	12704.6	9326.16	11326	18465.6	22327.4	20535.4	18394.6	16167.6	13940.6	11713.6	473.345	357.384	771.507	1212.52	1121.59	1013.41	897.936
17	FHUEA	70887-88-6	201	1	3.0956	9.58274	42.6972	23.7016	0	0	24	22	2	0	8	0	2	0	0	12	0	0	0	12	5999.35	4160.69	8860.76	12751.8	11058.9	9184.16	6702.53	4069	2392.58	6007.61	7052.75	10696.8	12016.3	10313.8	8521.41	6368.59	4238.37	2695.52	292.464	221.248	442.679	639.483	552.896	470.301	365.192
18	FOUEA	70887-84-2	235.8	1	4.0788	16.6366	52.0332	29.4496	0	0	30	28	2	0	10	0	2	0	0	16	0	0	0	16	7731.64	5361.98	11696.7	17753.3	16060.5	14185.7	11704.1	9203.31	6702.53	7562.82	8995.09	14088.6	16470.3	14767.8	12975.4	10822.6	8595.59	6368.59	371.546	280.265	577.633	870.436	783.849	701.254	596.145
19	FDUEA	70887-94-4	267	1	5.062	25.6238	61.3692	35.1976	0	0	36	34	2	0	12	0	2	0	0	20	0	0	0	20	9463.92	6563.26	14532.6	22754.9	21062	19187.3	16705.6	14204.9	11704.1	9118.03	10937.4	17480.3	20924.3	19221.8	17429.4	15276.6	13049.6	10822.6	450.627	339.282	712.586	1101.39	1014.8	932.207	827.098
20	FPrPA	356-02-5	146.4	1	1.5883	2.5227	30.4507	19.397	0	0	20	15	5	0	6	0	2	0	0	7	0	0	0	7	3909.18	2767.53	5643.13	6726.27	4716.1	3115.22	2450.03	1874.14	57.4512	4368.61	5180.79	7508.03	7745.18	5988.92	4329.25	2918.07	1437.49	222.55	217.539	172.6	341.901	467.07	377.891	279.462	201.545
21	FPePA	914637-49-3	199.8	1	2.5715	6.61261	39.7867	25.145	0	0	26	21	5	0	8	0	2	0	0	11	0	0	0	11	5641.46	3968.82	8479.06	11727.8	9717.66	8368.19	5903.68	3151.49	2450.03	5923.82	7123.13	10899.8	12199.2	10442.9	8670.79	6529.99	4415.45	2918.07	296.62	231.617	476.854	698.023	608.844	513.946	405.769
22	FHpPA	812-70-4	239.4	1	3.5547	12.6359	49.1227	30.893	0	0	32	27	5	0	10	0	2	0	0	15	0	0	0	15	7373.75	5170.11	11315	16729.4	14719.2	13369.8	10905.2	8404.46	5903.68	7479.03	9065.47	14291.5	16653.2	14896.9	13124.8	10984	8756.99	6529.99	375.701	290.634	611.807	928.976	839.797	744.899	636.722
23	ADONA	919005-14-4	215	1	5.0322	25.323	41.517	23.5456	0	0	25	23	2	0	7	0	4	0	0	12	0	0	0	12	6367.02	4496.55	9778.02	11099.8	10371.3	8669.81	9063.61	5419.9	4203.65	6016.88	6993.12	10174.7	10646.3	9618.31	8466.44	7433.68	5235.07	4025.14	311.627	238.762	499.478	573.303	556.371	455.404	457.339
24	HFPO-DA	13252-13-6	194	1	3.5449	12.5663	35.1372	19.7598	0	0	21	20	1	0	6	0	3	0	0	11	0	0	0	11	5604.84	3871.93	8655.73	10879.4	8769.52	7355.84	6952.72	5122.59	57.4512	5168.84	5999.09	8952.45	9492.06	8063.14	7001.15	5709.32	3030.89	222.55	268.017	200.593	418.884	527.151	439.03	380.658	349.241
25	HFPO-TA	13252-14-7	251.4	1	5.7399	32.9465	51.9525	29.1838	0	0	31	30	1	0	9	0	4	0	0	17	0	0	0	17	8459.23	5913.92	13473.7	17214.3	15896.1	15757.4	15805.5	15266.4	7355.84	7718.05	9094.55	13919.8	15531.9	14954.8	14726.7	13906.6	11249.9	7001.15	399.99	301.646	648.803	828.727	774.391	774.054	766.224
26	PFBS	375-73-5	184.8	1	2.535	6.42622	31.9673	18.0258	0	0	18	17	1	0	4	0	3	1	0	9	0	0	0	9	5622.27	4426.48	8400.59	11299	8804.23	6443.53	2786.01	57.4512	0	4564.5	5397.81	8315.44	8880.75	6638.09	4383.09	2024.68	222.55	0	229.68	171.483	363.47	506.03	392.347	277.135	159.398
27	PFPeS	2706-91-4	208.8	1	3.0266	9.16031	36.6353	20.8998	0	0	21	20	1	0	5	0	3	1	0	11	0	0	0	11	6488.42	5027.13	9818.56	13799.7	11305	8804.23	6443.53	2786.01	57.4512	5342.1	6368.98	10011.3	11107.7	8865.09	6638.09	4383.09	2024.68	222.55	269.22	200.992	430.947	621.507	507.824	392.347	277.135
28	PFHxS	355-46-4	228.6	1	3.5182	12.3777	41.3033	23.7738	0	0	24	23	1	0	6	0	3	1	0	13	0	0	0	13	7354.56	5627.77	11236.5	16300.5	13805.8	11305	8804.23	6443.53	2786.01	6119.71	7340.15	11707.2	13334.7	11092.1	8865.09	6638.09	4383.09	2024.68	308.761	230.5	498.423	736.983	623.3	507.824	392.347
29	PFHpS	375-92-8	246.6	1	4.0098	16.0785	45.9713	26.6478	0	0	27	26	1	0	7	0	3	1	0	15	0	0	0	15	8220.7	6228.42	12654.5	18801.3	16306.6	13805.8	11305	8804.23	6443.53	6897.31	8311.32	13403	15561.7	13319.1	11092.1	8865.09	6638.09	4383.09	348.301	260.009	565.9	852.46	738.777	623.3	507.824
30	PFOS	1763-23-1	262.8	1	4.5014	20.2626	50.6393	29.5218	0	0	30	29	1	0	8	0	3	1	0	17	0	0	0	17	9086.85	6829.06	14072.4	21302.1	18807.3	16306.6	13805.8	11305	8804.23	7674.92	9282.5	15098.9	17788.7	15546.1	13319.1	11092.1	8865.09	6638.09	387.842	289.517	633.376	967.936	854.253	738.777	623.3
31	PFNS	68259-12-1	278.4	1	4.993	24.93	55.3073	32.3958	0	0	33	32	1	0	9	0	3	1	0	19	0	0	0	19	9952.99	7429.7	15490.4	23802.9	21308.1	18807.3	16306.6	13805.8	11305	8452.52	10253.7	16794.8	20015.7	17773.1	15546.1	13319.1	11092.1	8865.09	427.382	319.026	700.853	1083.41	969.73	854.253	738.777
32	PFDS	335-77-3	292.8	1	5.4846	30.0808	59.9753	35.2698	0	0	36	35	1	0	10	0	3	1	0	21	0	0	0	21	10819.1	8030.35	16908.4	26303.6	23808.9	21308.1	18807.3	16306.6	13805.8	9230.13	11224.8	18490.6	22242.7	20000.1	17773.1	15546.1	13319.1	11092.1	466.923	348.534	768.329	1198.89	1085.21	969.73	854.253
33	PFDoS	79780-39-5	320.4	1	6.4678	41.8324	69.3113	41.0178	0	0	42	41	1	0	12	0	3	1	0	25	0	0	0	25	12551.4	9231.63	19744.3	31305.2	28810.5	26309.7	23808.9	21308.1	18807.3	10785.3	13167.2	21882.4	26696.7	24454.1	22227.1	20000.1	17773.1	15546.1	546.004	407.551	903.282	1429.84	1316.16	1200.68	1085.21
34	4:2FTS	757124-72-4	179.4	1	1.755	3.08002	38.9818	24.213	0	0	24	19	5	0	6	0	3	1	0	9	0	0	0	9	5914.87	4763.44	8066.63	9748.83	8443.9	7670.09	4954.17	4392.8	2786.01	5535.87	6703.79	10083	10643.1	8864.34	7319.64	5291.3	3765.92	2024.68	271.634	215.035	448.335	622.668	524.611	440.003	328.294
35	6:2FTS	27619-97-2	219	1	2.7382	7.49774	48.3178	29.961	0	0	30	25	5	0	8	0	3	1	0	13	0	0	0	13	7647.15	5964.73	10902.6	14750.4	13445.5	12671.7	10207.1	7706.36	4954.17	7091.08	8646.13	13474.8	15097.1	13318.3	11773.6	9632.84	7405.84	5291.3	350.715	274.052	583.288	853.621	755.564	670.956	562.779
36	8:2FTS	39108-34-4	252	1	3.7214	13.8488	57.6538	35.709	0	0	36	31	5	0	10	0	3	1	0	17	0	0	0	17	9379.44	7166.02	13738.5	19751.9	18447	17673.2	15208.7	12707.9	10207.1	8646.29	10588.5	16866.5	19551.1	17772.3	16227.6	14086.8	11859.8	9632.84	429.796	333.069	718.241	1084.57	986.517	901.909	793.732
37	10:2FTS	120226-60-0	282	1	4.7046	22.1333	66.9898	41.457	0	0	42	37	5	0	12	0	3	1	0	21	0	0	0	21	11111.7	8367.3	16574.4	24753.5	23448.6	22674.8	20210.3	17709.5	15208.7	10201.5	12530.8	20258.2	24005.1	22226.3	20681.6	18540.8	16313.8	14086.8	508.878	392.086	853.194	1315.53	1217.47	1132.86	1024.68
38	PFECHS	1135682-88-0	244.8	1	3.2213	10.3768	47.665	28.4078	0	0	28	27	1	0	8	0	3	1	0	15	0	0	0	15	8364.97	6516.94	13239.9	22608	27370.3	21774.2	8885.87	2203.94	0	7320.83	9158.36	16000.1	21810	22556.8	15672.3	6010.25	1210.63	0	355.842	275.09	610.614	956.98	1179.84	1053.57	478.31
39	6:2 Cl-PFESA	756426-58-1	274.2	1	5.5512	30.8158	58.3118	31.9468	0	0	31	30	1	0	8	0	4	1	0	16	1	0	0	17	10238.6	7266.72	15438.3	21304.1	17959.6	16109.6	15390.3	13021.3	9336.97	8218.23	9652.61	15400	17359	15054.5	13237.7	12069.4	9979.8	7990.99	397.269	300.603	654.79	925.541	810.175	687.059	636.188
40	8:2 Cl-PFESA	763051-92-9	303.6	1	6.5344	42.6984	67.6478	37.6948	0	0	37	36	1	0	10	0	4	1	0	20	1	0	0	21	11970.9	8468.01	18274.2	26305.7	22961.2	21111.2	20391.8	17929.4	15428.6	9773.44	11594.9	18791.7	21813	19508.5	17691.7	16523.4	14444.8	12217.8	476.35	359.62	789.743	1156.49	1041.13	918.012	867.142
41	FOSA	754-91-6	312.6	0	4.1064	16.8625	50.8615	30.4866	0	0	31	29	2	0	8	1	2	1	0	17	0	0	0	17	9028.09	6777.31	14018.1	21246.8	18758.1	16257.4	13756.6	11255.8	8755.02	7732.92	9396.11	15310.6	18109.4	15851.1	13624.1	11397.1	9170.11	6943.11	391.41	295.244	643.135	989.053	877.164	761.687	646.211
42	N-MeFOSA-M	31506-32-8	364.8	0	4.2087	17.7132	56.5582	33.5802	0	0	34	30	4	0	9	1	2	1	0	17	0	0	0	17	9174.39	6967.75	14427.4	21831.1	19441.5	16958.8	14458	11957.3	9456.48	8218.61	9974.37	16115	19361.5	17395.5	15121.5	12894.5	10667.5	8440.49	412.387	317.088	688.981	1033.75	956.999	846.903	731.426
43	N-EtFOSA-M	4151-50-2	376.8	0	4.4591	19.8836	60.852	36.6738	0	0	37	31	6	0	10	1	2	1	0	17	0	0	0	17	9320.68	7136.23	14643	22243.4	20025.7	17642.1	15159.5	12658.7	10157.9	8704.29	10627.4	16953.8	20259.1	18647.5	16665.8	14391.9	12164.9	9937.87	433.365	338.864	731.78	1099.75	1001.7	926.738	816.642
44	FOSAA	2806-24-8	253.2	1	3.6648	13.4308	62.6428	36.9442	0	0	37	33	4	0	10	1	4	1	0	17	0	0	0	17	9830.59	7500.36	15256.1	22735.8	21000	18950.6	16652.8	14158.1	11657.3	9074.91	10970.6	17452.9	20795.4	19177.6	17467.9	15269.7	13027	10800	446.631	347.05	730.808	1112.42	1020.81	936.416	837.673
45	N-MeFOSAA	2355-31-9	260.4	1	3.7671	14.191	68.3395	40.0378	0	0	40	34	6	0	11	1	4	1	0	17	0	0	0	17	9976.88	7690.8	15786.4	23507.7	22077.8	19759.9	17357.3	14859.5	12358.7	9560.59	11548.9	18482.4	22774.5	21694.1	19541	16860.3	14524.4	12297.4	467.609	368.895	776.679	1159.54	1163.44	1078.86	943.044
46	N-EtFOSAA	2991-50-6	267	1	4.0175	16.1403	72.6333	43.1313	0	0	43	35	8	0	12	1	4	1	0	17	0	0	0	17	10123.2	7859.28	16002.1	24041	22849.6	20837.7	18166.6	15564	13060.2	10046.3	12201.9	19321.2	23897.2	23673.2	22057.5	18933.4	16115	13794.8	488.586	390.671	819.477	1225.56	1210.55	1221.48	1085.49
47	N-MeFOSE-M	24448-09-7	360.6	0	3.7716	14.225	68.5472	40.5693	0	0	41	33	8	0	11	1	3	1	0	17	0	0	0	17	9722.95	7522.85	15395.7	23269.5	21461.5	19102.2	16658	14160.3	11659.5	9406.37	11475.6	18387.8	22659.4	21533.8	19303.5	16692.3	14356.4	12129.4	467.694	373.096	793.189	1176.32	1172.16	1106.14	959.486
48	N-EtFOSE-M	1691-99-2	373.8	0	4.022	16.1765	72.841	43.6629	0	0	44	34	10	0	12	1	3	1	0	17	0	0	0	17	9869.24	7691.33	15611.4	23802.9	22233.4	20026.2	17425.1	14864.8	12360.9	9892.05	12128.6	19226.6	23782.2	23512.9	21766.5	18705.9	15947.1	13626.8	488.671	394.872	835.988	1242.35	1219.28	1249	1113.82
49	PFHxPA	40143-76-8	136.2	2	3.5895	12.8845	41.7158	25.1706	0	0	25	23	2	0	6	0	3	0	1	13	0	0	0	13	7287.11	5578.72	11212.3	16290.6	13802.9	11301.1	8800.31	6432.03	2836.41	6150.79	7422.17	11843.4	13613.5	11386.3	9128.19	6901.19	4646.19	2287.79	313.06	233.913	499.047	758.293	653.123	530.928	415.451
50	PFOPA	40143-78-0	182.4	2	4.5727	20.9096	51.0518	30.9186	0	0	31	29	2	0	8	0	3	0	1	17	0	0	0	17	9019.39	6780	14048.3	21292.1	18804.5	16302.7	13801.9	11301.1	8800.31	7706	9364.51	15235.1	18067.5	15840.3	13582.2	11355.2	9128.19	6901.19	392.141	292.93	634	989.246	884.076	761.881	646.404
51	PFDPA	52299-26-0	216	2	5.5559	30.868	60.3878	36.6666	0	0	37	35	2	0	10	0	3	0	1	21	0	0	0	21	10751.7	7981.29	16884.2	26293.7	23806	21304.2	18803.4	16302.7	13801.9	9261.21	11306.8	18626.8	22521.5	20294.3	18036.2	15809.2	13582.2	11355.2	471.222	351.947	768.953	1220.2	1115.03	992.834	877.357
52	6:6PFPiA	40143-77-9	303	1	8.5114	72.4439	64.5941	41.5028	0	0	42	41	1	0	12	0	2	0	1	26	0	0	0	26	12587.9	9126.85	20811.1	32045.2	29604.9	27104.1	24603.3	22367.5	17621.3	10746	13160.9	22014.3	26977.4	24965.1	22738.1	20511.1	18228.1	15652.9	546.233	402.652	899.251	1416.54	1333.06	1217.59	1102.11
53	8:8PFPiA	40143-79-1	349.2	1	10.4778	109.784	83.2661	52.9988	0	0	54	53	1	0	16	0	2	0	1	34	0	0	0	34	16052.5	11529.4	26482.9	42048.3	39608	37107.2	34606.4	32105.6	29604.9	13856.4	17045.6	28797.7	35885.4	33873.1	31646.1	29419.1	27192.1	24965.1	704.395	520.686	1169.16	1878.44	1794.97	1679.49	1564.02
54	6:2diPAP	57677-95-9	300.6	1	6.312	39.8413	86.7331	55.4811	0	0	56	47	9	0	16	0	4	0	1	26	0	0	0	26	13685	10432.1	20912.2	29685.3	26293.7	23717.8	22367	18499	14200.8	13121.5	16091.5	25385.6	29832.1	27568.8	24877	22794.4	20156	17914.9	656.847	514.39	1122.43	1620.82	1546.66	1392.76	1286.43
55	6:2/8:2diPAP	943913-15-3	324	1	7.2952	53.2199	96.0691	61.2291	0	0	62	53	9	0	18	0	4	0	1	30	0	0	0	30	15417.3	11633.4	23748.1	34686.8	31295.3	28719.4	27368.5	23500.6	19453.8	14676.7	18033.9	28777.4	34286.1	32022.8	29331	27248.4	24610	22256.4	735.928	573.407	1257.38	1851.78	1777.61	1623.71	1517.38
56	8:2diPAP	678-41-1	345.6	1	8.2784	68.5319	105.405	66.9771	0	0	68	59	9	0	20	0	4	0	1	34	0	0	0	34	17149.6	12834.7	26584	39688.4	36296.8	33721	32370.1	28502.2	24706.8	16231.9	19976.2	32169.1	38740.1	36476.8	33785	31702.4	29064	26598	815.009	632.425	1392.34	2082.73	2008.57	1854.66	1748.33
57	diSAmPAP	2965-52-8	373.2	1	8.7172	75.9896	152.489	91.8931	0	0	90	71	19	0	24	2	8	2	1	34	0	0	0	34	21208.8	17348.7	33509.7	49647.8	46942	44597	43172.8	40075.9	35813.9	20782.6	25612.6	40663.8	50823.2	51488.1	49250.9	46872.2	45569.8	42521.5	1003.65	817.032	1758.18	2572.09	2632.9	2765.46	2502.24
58	Cl-PFOPA	2252239-09-9	188.4	2	4.7694	22.7472	55.8866	32.5416	0	0	31	29	2	0	8	0	3	0	1	16	1	0	0	17	9915.15	6977.6	14871	22114.8	19627.2	17125.4	14624.6	12123.8	9623.02	8032.93	9552.68	15666.6	18499	16271.8	14013.7	11786.7	9559.68	7332.68	388.217	291.488	628.358	983.605	878.434	756.239	640.762
[truncated: 1,398 more columns]

## Sheet: Table S3 651Xs
ID	Name	CAS	RTs	VR1_Dt	VR1_D	VR1_DzZ	VR1_Dzm	VR1_Dzp	VR1_Dzv	VR1_Dzs	VR1_Dze	VR1_Dzi	VR2_Dt	VR2_D	VR2_DzZ	VR2_Dzm	VR2_Dzp	VR2_Dzv	VR2_Dzs	VR2_Dze	VR2_Dzi	ATS3m	ATS4m	ATS5i	ATS6m	ATS4v	ATS5m	ATS5v	ATS7m	ATS3v	ATS6v	ATS6i	ATS7v	ATS7i	ATS4i	ATS8i	ATS3i	ATS8v	ATS8m	ATS2v	ATS2m	ATS2i	WPATH	ATS1v	ATS0m	ATS0v	ATS0i	ATS1m	ATS1i
1	PFBA	375-22-4	129	64.3139	64.3139	62.3691	62.0045	178.62	72.7622	60.8539	62.5841	61.984	4.94722	4.94722	4.79763	4.76957	13.74	5.59709	4.68107	4.81416	4.768	6979.37	4500.76	2050.56	57.4512	3535.23	1874.14	1437.49	0	5695.88	222.55	710.769	0	0	4292.59	0	6129.69	0	0	5680.94	5255.72	4574.66	216	3874.81	3616.58	3397.24	3187.88	2430.58	2245.56
2	PFPeA	2706-90-3	159	144.637	144.637	138.762	142.21	105.107	117.704	111.158	137.058	146.907	9.03979	9.03979	8.67263	8.8881	6.56918	7.35651	6.94739	8.56612	9.18171	9480.15	7001.54	4292.59	1874.14	5762.23	4500.76	3535.23	57.4512	7922.88	1437.49	2050.56	222.55	710.769	6418.35	0	8255.44	0	0	7376.8	6673.68	5789.76	375	4845.98	4482.73	4174.85	3921.78	3031.22	2764.72
3	PFHxA	307-24-4	186.6	128.415	128.415	126.757	126.237	185.481	138.054	126.498	127.052	126.024	6.75868	6.75868	6.67142	6.64407	9.76215	7.26599	6.65777	6.68697	6.63286	11980.9	9502.32	6418.35	4500.76	7989.23	7001.54	5762.23	1874.14	10149.9	3535.23	4292.59	1437.49	2050.56	8544.1	710.769	10381.2	222.55	57.4512	9072.67	8091.64	7004.85	594	5817.15	5348.87	4952.45	4655.68	3631.86	3283.89
4	PFHpA	375-85-9	207.6	237.615	237.615	232.215	235.639	184.816	206.847	204.04	230.477	239.924	10.8007	10.8007	10.5552	10.7109	8.40075	9.40211	9.27456	10.4762	10.9056	14481.7	12003.1	8544.1	7001.54	10216.2	9502.32	7989.23	4500.76	12376.9	5762.23	6418.35	3535.23	4292.59	10669.9	2050.56	12506.9	1437.49	1874.14	10768.5	9509.6	8219.94	882	6788.32	6215.01	5730.06	5389.58	4232.51	3803.05
5	PFOA	335-67-1	226.2	209.814	209.814	208.4	207.777	258.768	220.323	209.079	208.75	207.433	8.39258	8.39258	8.33602	8.31107	10.3507	8.81291	8.36317	8.35	8.29734	16982.5	14503.9	10669.9	9502.32	12443.2	12003.1	10216.2	7001.54	14603.9	7989.23	8544.1	5762.23	6418.35	12795.6	4292.59	14632.7	3535.23	4500.76	12464.4	10927.6	9435.03	1248	7759.49	7081.15	6507.66	6123.48	4833.15	4322.22
6	PFNA	375-95-1	243	350.498	350.498	345.196	348.73	285.138	315.837	316.437	343.377	352.944	12.5178	12.5178	12.3284	12.4547	10.1835	11.2799	11.3013	12.2635	12.6051	19483.3	17004.7	12795.6	12003.1	14670.2	14503.9	12443.2	9502.32	16830.9	10216.2	10669.9	7989.23	8544.1	14921.4	6418.35	16758.5	5762.23	7001.54	14160.3	12345.5	10650.1	1701	8730.66	7947.3	7285.27	6857.39	5433.79	4841.39
7	PFDA	335-76-2	258.6	306.961	306.961	305.746	305.043	353.57	318.226	307.135	306.137	304.602	9.90195	9.90195	9.86279	9.84011	11.4055	10.2654	9.90759	9.87539	9.82586	21984.1	19505.4	14921.4	14503.9	16897.2	17004.7	14670.2	12003.1	19057.9	12443.2	12795.6	10216.2	10669.9	17047.1	8544.1	18884.2	7989.23	9502.32	15856.1	13763.5	11865.2	2250	9701.83	8813.44	8062.87	7591.29	6034.44	5360.55
8	PFUnDA	2058-94-8	273.6	481.286	481.286	475.938	479.625	404.174	442.896	446.556	474.024	483.887	14.1555	14.1555	13.9982	14.1066	11.8875	13.0264	13.134	13.9419	14.232	24484.8	22006.2	17047.1	17004.7	19124.2	19505.4	16897.2	14503.9	21284.9	14670.2	14921.4	12443.2	12795.6	19172.9	10669.9	21010	10216.2	12003.1	17552	15181.5	13080.3	2904	10673	9679.58	8840.48	8325.19	6635.08	5879.72
9	PFDoDA	307-55-1	288.6	418.714	418.714	417.668	416.9	464.837	430.671	419.623	418.093	416.378	11.3166	11.3166	11.2883	11.2676	12.5631	11.6398	11.3412	11.2998	11.2535	26985.6	24507	19172.9	19505.4	21351.2	22006.2	19124.2	17004.7	23511.9	16897.2	17047.1	14670.2	14921.4	21298.6	12795.6	23135.7	12443.2	14503.9	19247.9	16599.4	14295.4	3672	11644.2	10545.7	9618.08	9059.09	7235.73	6398.89
10	PFTrDA	72629-94-8	303	628.629	628.629	623.17	627.025	540.459	586.704	593.131	621.156	631.385	15.7157	15.7157	15.5793	15.6756	13.5115	14.6676	14.8283	15.5289	15.7846	29486.4	27007.8	21298.6	22006.2	23578.2	24507	21351.2	19505.4	25738.9	19124.2	19172.9	16897.2	17047.1	23424.4	14921.4	25261.5	14670.2	17004.7	20943.7	18017.4	15510.5	4563	12615.3	11411.9	10395.7	9793	7836.37	6918.05
11	PFTeDA	376-06-7	316.2	544.188	544.188	543.287	542.462	590.619	556.79	545.714	543.742	541.872	12.6555	12.6555	12.6346	12.6154	13.7353	12.9486	12.691	12.6452	12.6017	31987.2	29508.6	23424.4	24507	25805.2	27007.8	23578.2	22006.2	27965.9	21351.2	21298.6	19124.2	19172.9	25550.1	17047.1	27387.2	16897.2	19505.4	22639.6	19435.3	16725.6	5586	13586.5	12278	11173.3	10526.9	8437.01	7437.22
12	PFHxDA	67905-19-5	341.4	682.664	682.664	681.891	681.015	729.796	695.874	684.725	682.372	680.364	13.9319	13.9319	13.9161	13.8983	14.8938	14.2015	13.974	13.926	13.885	36988.7	34510.1	27675.9	29508.6	30259.2	32009.4	28032.2	27007.8	32419.9	25805.2	25550.1	23578.2	23424.4	29801.6	21298.6	31638.7	21351.2	24507	26031.4	22271.3	19155.8	8064	15528.9	14010.3	12728.5	11994.7	9638.3	8475.55
13	PFODA	16517-11-6	363.6	833.544	833.544	832.885	831.963	881.587	847.33	836.08	833.391	831.258	15.1554	15.1554	15.1434	15.1266	16.0288	15.406	15.2015	15.1526	15.1138	41990.3	39511.7	31927.4	34510.1	34713.2	37010.9	32486.2	32009.4	36873.9	30259.2	29801.6	28032.2	27675.9	34053.2	25550.1	35890.2	25805.2	29508.6	29423.1	25107.2	21586	11178	17471.2	15742.6	14283.7	13462.5	10839.6	9513.88
14	FHEA	53826-12-3	215.4	264.694	264.694	255.775	250.847	495.785	408.575	429.317	258.616	247.701	11.5084	11.5084	11.1206	10.9064	21.5559	17.7641	18.666	11.2442	10.7696	14031.9	12668.3	10317.2	7703	11627.4	10203.8	9486.61	5202.22	13419.4	7259.61	8191.45	5032.61	6065.7	12338.9	3892.81	14071.7	2918.07	2450.03	11682.1	9703.31	9144.14	1026	7441.31	6361.31	6215.74	5886.21	4400.99	4236.09
15	FOEA	27854-31-5	237	455.658	455.658	438.125	428.492	713.74	764.632	762.474	443.691	422.388	15.7124	15.7124	15.1078	14.7756	24.6117	26.3666	26.2922	15.2997	14.5651	19033.4	17669.9	14568.7	12704.6	16081.4	15205.3	13940.6	10203.8	17873.4	11713.6	12443	9486.61	10317.2	16590.5	8191.45	18323.2	7259.61	7703	15073.8	12539.2	11574.3	1914	9383.65	8093.59	7770.95	7354.02	5602.27	5274.43
16	FDEA	53826-13-4	267.6	714.698	714.698	684.516	668.07	1004.68	1288.1	1217.67	694.042	657.764	20.4199	20.4199	19.5576	19.0877	28.7053	36.8028	34.7906	19.8298	18.7933	24035	22671.4	18820.2	17706.1	20535.4	20206.9	18394.6	15205.3	22327.4	16167.6	16694.5	13940.6	14568.7	20842	12443	22574.7	11713.6	12704.6	18465.6	15375.2	14004.5	3198	11326	9825.88	9326.16	8821.82	6803.56	6312.76
17	FHUEA	70887-88-6	201	304.867	304.867	657.629	781.956	193.258	271.457	166.513	608.325	920.493	13.8576	13.8576	29.8922	35.5434	8.78443	12.339	7.56876	27.6511	41.8406	12751.8	11058.9	8650.02	6702.53	10313.8	9184.16	8521.41	4069	12016.3	6368.59	6761.19	4238.37	4528.07	10249.2	3182.04	11838	2695.52	2392.58	10696.8	8860.76	7957.05	933	7052.75	5999.35	6007.61	5397.74	4160.69	3886.79
18	FOUEA	70887-84-2	235.8	1031.03	1031.03	557.238	585.272	290.117	370.276	268.867	543.566	606.65	36.8223	36.8223	19.9014	20.9026	10.3613	13.2241	9.60238	19.4131	21.6661	17753.3	16060.5	12901.5	11704.1	14767.8	14185.7	12975.4	9203.31	16470.3	10822.6	11012.7	8595.59	8886.94	14500.7	6761.19	16089.5	6368.59	6702.53	14088.6	11696.7	10387.2	1770	8995.09	7731.64	7562.82	6865.54	5361.98	4925.12
19	FDUEA	70887-94-4	267	5227.79	5227.79	639.099	656.119	405.825	492.478	390.66	630.42	667.907	153.758	153.758	18.797	19.2976	11.936	14.4846	11.49	18.5418	19.6443	22754.9	21062	17153	16705.6	19221.8	19187.3	17429.4	14204.9	20924.3	15276.6	15264.2	13049.6	13138.5	18752.3	11012.7	20341	10822.6	11704.1	17480.3	14532.6	12817.4	2991	10937.4	9463.92	9118.03	8333.35	6563.26	5963.45
20	FPrPA	356-02-5	146.4	120.629	120.629	114.906	112.489	157.564	204.728	262.933	116.314	111.122	8.04195	8.04195	7.66041	7.49926	10.5042	13.6486	17.5289	7.75429	7.40811	6726.27	4716.1	5561.9	2450.03	5988.92	3115.22	4329.25	1874.14	7745.18	2918.07	3892.81	1437.49	2050.56	7526.47	710.769	9173.42	222.55	57.4512	7508.03	5643.13	6423.07	356	5180.79	3909.18	4368.61	4181.13	2767.53	3111.63
21	FPePA	914637-49-3	199.8	410.923	410.923	334.811	314.402	197.674	710.374	237.319	347.9	304.289	19.5678	19.5678	15.9434	14.9715	9.41306	33.8273	11.3009	16.5667	14.49	11727.8	9717.66	9860.54	5903.68	10442.9	8368.19	8670.79	3151.49	12199.2	6529.99	7838.8	4415.45	5665.91	11778	3892.81	13424.9	2918.07	2450.03	10899.8	8479.06	8853.25	842	7123.13	5641.46	5923.82	5648.94	3968.82	4149.97
22	FHpPA	812-70-4	239.4	881.292	881.292	1472.07	2598.98	271.918	386.018	302.493	1240.54	5443.15	32.6405	32.6405	54.5212	96.2587	10.071	14.297	11.2035	45.9458	201.598	16729.4	14719.2	14112.1	10905.2	14896.9	13369.8	13124.8	8404.46	16653.2	10984	12090.3	8756.99	9964.56	16029.5	7838.8	17676.4	6529.99	5903.68	14291.5	11315	11283.4	1628	9065.47	7373.75	7479.03	7116.74	5170.11	5188.3
23	ADONA	919005-14-4	215	6765.61	6765.61	321.64	329.581	254.457	350.989	162.581	319.335	458.496	294.157	294.157	13.9844	14.3296	11.0633	15.2604	7.06872	13.8841	19.9346	11099.8	10371.3	8490.21	9063.61	9618.31	8669.81	8466.44	5419.9	10646.3	7433.68	8243.65	5235.07	5181.83	10108.3	4676.08	10224.1	4025.14	4203.65	10174.7	9778.02	8761.11	1134	6993.12	6367.02	6016.88	5641.85	4496.55	4119.78
24	HFPO-DA	13252-13-6	194	116.084	116.084	128.258	127.806	108.9	110.437	211.394	128.324	121.846	5.80419	5.80419	6.41289	6.3903	5.44501	5.52183	10.5697	6.41618	6.09232	10879.4	8769.52	6959.7	6952.72	8063.14	7355.84	7001.15	5122.59	9492.06	5709.32	6380.37	3030.89	4782.54	7787.97	710.769	9314.72	222.55	57.4512	8952.45	8655.73	7372.5	716	5999.09	5604.84	5168.84	4841.13	3871.93	3463.78
25	HFPO-TA	13252-14-7	251.4	493.509	493.509	415.98	412.999	5354.02	761.178	333.003	418.16	431.653	16.4503	16.4503	13.866	13.7666	178.467	25.3726	11.1001	13.9387	14.3884	17214.3	15896.1	14009	15805.5	14954.8	15757.4	14726.7	15266.4	15531.9	13906.6	13778.9	11249.9	13251.9	13773.3	6959.7	14544.7	7001.15	7355.84	13919.8	13473.7	11385.4	2124	9094.55	8459.23	7718.05	7228.29	5913.92	5201.17
26	PFBS	375-73-5	184.8	4.00005e+06	4.00005e+06	106.173	106.658	111.011	144.403	123.936	267.859	500.139	235297	235297	6.24548	6.27398	6.53007	8.49427	7.29033	15.7564	29.42	11299	8804.23	4873.41	2786.01	6638.09	6443.53	4383.09	57.4512	8880.75	2024.68	2762.35	222.55	710.769	7004.71	0	9026.99	0	0	8315.44	8400.59	6260.25	436	5397.81	5622.27	4564.5	4087.76	4426.48	2871.15
27	PFPeS	2706-91-4	208.8	133.546	133.546	141.398	140.592	292.215	140.085	234.863	131.269	132.861	6.67728	6.67728	7.0699	7.02961	14.6108	7.00426	11.7431	6.56345	6.64303	13799.7	11305	7004.71	6443.53	8865.09	8804.23	6638.09	2786.01	11107.7	4383.09	4873.41	2024.68	2762.35	9130.47	710.769	11152.7	222.55	57.4512	10011.3	9818.56	7475.34	676	6368.98	6488.42	5342.1	4821.67	5027.13	3390.31
28	PFHxS	355-46-4	228.6	4.0001e+06	4.0001e+06	211.943	213.384	195.37	282.011	329.666	544.038	1108.61	173917	173917	9.21491	9.27758	8.49435	12.2614	14.3333	23.6538	48.2004	16300.5	13805.8	9130.47	8804.23	11092.1	11305	8865.09	6443.53	13334.7	6638.09	7004.71	4383.09	4873.41	11256.2	2762.35	13278.5	2024.68	2786.01	11707.2	11236.5	8690.44	988	7340.15	7354.56	6119.71	5555.57	5627.77	3909.48
29	PFHpS	375-92-8	246.6	213.808	213.808	220.415	219.729	279.39	219.699	266.279	211.8	213.023	8.22337	8.22337	8.47749	8.45111	10.7458	8.44998	10.2415	8.14617	8.1932	18801.3	16306.6	11256.2	11305	13319.1	13805.8	11092.1	8804.23	15561.7	8865.09	9130.47	6638.09	7004.71	13382	4873.41	15404.3	4383.09	6443.53	13403	12654.5	9905.53	1381	8311.32	8220.7	6897.31	6289.47	6228.42	4428.65
30	PFOS	1763-23-1	262.8	4.00015e+06	4.00015e+06	356.751	359.691	309.435	471.2	522.579	939.272	2071.82	137936	137936	12.3018	12.4031	10.6702	16.2483	18.02	32.3887	71.442	21302.1	18807.3	13382	13805.8	15546.1	16306.6	13319.1	11305	17788.7	11092.1	11256.2	8865.09	9130.47	15507.7	7004.71	17530	6638.09	8804.23	15098.9	14072.4	11120.6	1864	9282.5	9086.85	7674.92	7023.37	6829.06	4947.81
31	PFNS	68259-12-1	278.4	308.99	308.99	314.829	314.214	358.58	314.485	394.774	307.194	308.129	9.65593	9.65593	9.83841	9.81919	11.2056	9.82765	12.3367	9.5998	9.62902	23802.9	21308.1	15507.7	16306.6	17773.1	18807.3	15546.1	13805.8	20015.7	13319.1	13382	11092.1	11256.2	17633.5	9130.47	19655.8	8865.09	11305	16794.8	15490.4	12335.7	2446	10253.7	9952.99	8452.52	7757.28	7429.7	5466.98
32	PFDS	335-77-3	292.8	4.00022e+06	4.00022e+06	542.98	548.058	453.049	715.298	423.06	1466.3	3457.99	114292	114292	15.5137	15.6588	12.9442	20.4371	12.0874	41.8943	98.7998	26303.6	23808.9	17633.5	18807.3	20000.1	21308.1	17773.1	16306.6	22242.7	15546.1	15507.7	13319.1	13382	19759.2	11256.2	21781.5	11092.1	13805.8	18490.6	16908.4	13550.8	3136	11224.8	10819.1	9230.13	8491.18	8030.35	5986.14
33	PFDoS	79780-39-5	320.4	4.0003e+06	4.0003e+06	773	780.943	626.508	1017.42	505.293	2136.54	5328.84	97568.3	97568.3	18.8537	19.0474	15.2807	24.8151	12.3242	52.1108	129.972	31305.2	28810.5	21885	23808.9	24454.1	26309.7	22227.1	21308.1	26696.7	20000.1	19759.2	17773.1	17633.5	24010.7	15507.7	26033	15546.1	18807.3	21882.4	19744.3	15981	4876	13167.2	12551.4	10785.3	9958.98	9231.63	7024.48
34	4:2FTS	757124-72-4	179.4	249.351	249.351	134.64	134.983	179.074	150.972	186.757	197.612	342.417	13.1237	13.1237	7.08629	7.10435	9.42496	7.94591	9.82932	10.4006	18.022	9748.83	8443.9	8321.15	4954.17	8864.34	7670.09	7319.64	4392.8	10643.1	5291.3	6252.28	3765.92	4473.62	10134.4	2762.35	11973.5	2024.68	2786.01	10083	8066.63	8115.54	658	6703.79	5914.87	5535.87	5081.02	4763.44	3737.23
35	6:2FTS	27619-97-2	219	259.644	259.644	210.652	210.751	260.512	221.587	257.335	243.359	280.315	10.3857	10.3857	8.42609	8.43003	10.4205	8.86347	10.2934	9.73436	11.2126	14750.4	13445.5	12572.7	10207.1	13318.3	12671.7	11773.6	7706.36	15097.1	9632.84	10550.9	7405.84	8425.17	14385.9	6252.28	16225	5291.3	4954.17	13474.8	10902.6	10545.7	1342	8646.13	7647.15	7091.08	6548.83	5964.73	4775.56
36	8:2FTS	39108-34-4	252	326.47	326.47	302.005	301.824	359.236	309.605	401.842	318.411	335.491	10.5313	10.5313	9.7421	9.73627	11.5883	9.98725	12.9626	10.2713	10.8223	19751.9	18447	16824.2	15208.7	17772.3	17673.2	16227.6	12707.9	19551.1	14086.8	14802.4	11859.8	12676.7	18637.4	10550.9	20476.5	9632.84	10207.1	16866.5	13738.5	12975.9	2374	10588.5	9379.44	8646.29	8016.63	7166.02	5813.89
37	10:2FTS	120226-60-0	282	420.426	420.426	409.231	408.81	473.484	414.992	1540.72	415.664	424.821	11.3629	11.3629	11.0603	11.0489	12.7969	11.216	41.6412	11.2342	11.4817	24753.5	23448.6	21075.7	20210.3	22226.3	22674.8	20681.6	17709.5	24005.1	18540.8	19053.9	16313.8	16928.2	22889	14802.4	24728	14086.8	15208.7	20258.2	16574.4	15406.1	3826	12530.8	11111.7	10201.5	9484.44	8367.3	6852.22
38	PFECHS	1135682-88-0	244.8	201.071	265.604	286.171	285.501	325.156	284.346	3538.69	267.686	260.198	7.44707	9.83719	10.5989	10.5741	12.0428	10.5313	131.063	9.91428	9.63696	22608	27370.3	19057.4	8885.87	22556.8	21774.2	15672.3	2203.94	21810	6010.25	9072.96	1210.63	2295.17	20649.3	0	16984.1	0	0	16000.1	13239.9	10677.4	1278	9158.36	8364.97	7320.83	6416.27	6516.94	4682.23
39	6:2 Cl-PFESA	756426-58-1	274.2	291.62	291.62	472.829	464.725	313.514	413.991	365.089	343.656	300.674	9.72066	9.72066	15.761	15.4908	10.4505	13.7997	12.1696	11.4552	10.0225	21304.1	17959.6	12412.9	15390.3	15054.5	16109.6	13237.7	13021.3	17359	12069.4	11204.8	9979.8	9556.96	14451.3	7258.98	16452.5	7990.99	9336.97	15400	15438.3	11259.4	2164	9652.61	10238.6	8218.23	7073.43	7266.72	5077.54
40	8:2 Cl-PFESA	763051-92-9	303.6	401.882	401.882	605.681	597.777	532.907	504.05	397.27	473.29	418.461	11.1634	11.1634	16.8245	16.6049	14.803	14.0014	11.0353	13.1469	11.6239	26305.7	22961.2	16664.4	20391.8	19508.5	21111.2	17691.7	17929.4	21813	16523.4	15456.3	14444.8	13804.4	18702.8	11678.7	20704	12217.8	15428.6	18791.7	18274.2	13689.6	3547	11594.9	11970.9	9773.44	8541.23	8468.01	6115.87
41	FOSA	754-91-6	312.6	4.00015e+06	4.00015e+06	358.347	361.346	305.635	465.1	629.009	1023.17	2408.56	137936	137936	12.3568	12.4602	10.5391	16.0379	21.69	35.2816	83.0539	21246.8	18758.1	14051.2	13756.6	15851.1	16257.4	13624.1	11255.8	18109.4	11397.1	11925.4	9170.11	9799.67	16176.9	7673.92	18095.7	6943.11	8755.02	15310.6	14018.1	11481.7	1864	9396.11	9028.09	7732.92	7234.08	6777.31	5167.4
42	N-MeFOSA-M	31506-32-8	364.8	364.273	364.273	1382.39	1571.23	549.192	587.066	354.795	406.106	353.861	12.1424	12.1424	46.0796	52.3744	18.3064	19.5689	11.8265	13.5369	11.7954	21831.1	19441.5	15824.3	14458	17395.5	16958.8	15121.5	11957.3	19361.5	12894.5	13698.5	10667.5	11572.8	17639.6	9447.02	18983.1	8440.49	9456.48	16115	14427.4	12573.3	2056	9974.37	9174.39	8218.61	7730.71	6967.75	5592.79
43	N-EtFOSA-M	4151-50-2	376.8	301.363	301.363	439.646	432.607	872.961	324.059	455.506	306.123	299.305	9.72139	9.72139	14.1821	13.9551	28.16	10.4535	14.6937	9.87493	9.65499	22243.4	20025.7	17287	15159.5	18647.5	17642.1	16665.8	12658.7	20259.1	14391.9	15471.6	12164.9	13345.9	18527	11220.1	20629.5	9937.87	10157.9	16953.8	14643	13489.9	2278	10627.4	9320.68	8704.29	8227.34	7136.23	6025.82
44	FOSAA	2806-24-8	253.2	559.825	559.825	314.055	313.715	337.07	432.536	430.209	394.697	474.821	16.9644	16.9644	9.51683	9.50652	10.2142	13.1072	13.0366	11.9605	14.3885	22735.8	21000	17090.8	16652.8	19177.6	18950.6	17467.9	14158.1	20795.4	15269.7	15370	13027	13347.7	18769.6	11221.9	20402	10800	11657.3	17452.9	15256.1	13121	2786	10970.6	9830.59	9074.91	8228.41	7500.36	6058.33
45	N-MeFOSAA	2355-31-9	260.4	5227.79	5227.79	324.881	324.95	355.187	662.322	517.908	529.584	970.848	153.758	153.758	9.55532	9.55735	10.4467	19.48	15.2326	15.576	28.5544	23507.7	22077.8	19943.2	17357.3	21694.1	19759.9	19541	14859.5	22774.5	16860.3	17697.8	14524.4	15120.8	21737.5	12995	21104.1	12297.4	12358.7	18482.4	15786.4	14218.2	2991	11548.9	9976.88	9560.59	8725.04	7690.8	6483.71
46	N-EtFOSAA	2991-50-6	267	599.616	599.616	345.569	346.28	394.348	1231.04	1668.85	5342.6	753.006	17.1319	17.1319	9.87339	9.8937	11.2671	35.1725	47.6815	152.646	21.5145	24041	22849.6	22911	18166.6	23673.2	20837.7	22057.5	15564	23897.2	18933.4	20550.2	16115	17448.6	22439.5	14768.1	22755.9	13794.8	13060.2	19321.2	16002.1	15134.7	3230	12201.9	10123.2	10046.3	9221.67	7859.28	6916.75
47	N-MeFOSE-M	24448-09-7	360.6	393.558	393.558	316.801	316.045	338.372	357.539	420.618	349.649	385.659	11.926	11.926	9.60003	9.57711	10.2537	10.8345	12.746	10.5954	11.6866	23269.5	21461.5	21019.9	16658	21533.8	19102.2	19303.5	14160.3	22659.4	16692.3	18323.9	14356.4	15746.9	22031	13621.1	21855.4	12129.4	11659.5	18387.8	15395.7	14740.9	2732	11475.6	9722.95	9406.37	8909.42	7522.85	6636.61
48	N-EtFOSE-M	1691-99-2	373.8	694.195	694.195	321.626	321.481	344.823	481.927	506.189	454.999	633.966	20.4175	20.4175	9.4596	9.45532	10.1419	14.1743	14.8879	13.3823	18.6461	23802.9	22233.4	23956	17425.1	23512.9	20026.2	21766.5	14864.8	23782.2	18705.9	21730.2	15947.1	18074.7	22733.1	15394.2	23507.3	13626.8	12360.9	19226.6	15611.4	15657.4	2966	12128.6	9869.24	9892.05	9406.05	7691.33	7069.65
49	PFHxPA	40143-76-8	136.2	4.0001e+06	4.0001e+06	218.123	217.931	191.382	314.369	262.661	887.342	680.163	173917	173917	9.48363	9.47524	8.32095	13.6682	11.42	38.5801	29.5723	16290.6	13802.9	9763.28	8800.31	11386.3	11301.1	9128.19	6432.03	13613.5	6901.19	7637.52	4646.19	5507	12073.9	3389.32	13807.8	2287.79	2836.41	11843.4	11212.3	8840.6	988	7422.17	7287.11	6150.79	5743.13	5578.72	4101.27
50	PFOPA	40143-78-0	182.4	4.00015e+06	4.00015e+06	368.29	368.275	302.229	530.1	2656.79	1608.6	1209.36	137936	137936	12.6996	12.6991	10.4217	18.2793	91.6135	55.4691	41.7021	21292.1	18804.5	14014.8	13801.9	15840.3	16302.7	13582.2	11301.1	18067.5	11355.2	11889	9128.19	9763.28	16325.5	7637.52	18059.3	6901.19	8800.31	15235.1	14048.3	11270.8	1864	9364.51	9019.39	7706	7210.93	6780	5139.6
51	PFDPA	52299-26-0	216	4.00022e+06	4.00022e+06	561.976	562.294	441.773	810.747	462.395	2617.41	1935.73	114292	114292	16.0565	16.0656	12.6221	23.1642	13.2113	74.7831	55.3065	26293.7	23806	18266.3	18803.4	20294.3	21304.2	18036.2	16302.7	22521.5	15809.2	16140.5	13582.2	14014.8	20577	11889	22310.8	11355.2	13801.9	18626.8	16884.2	13701	3136	11306.8	10751.7	9261.21	8678.74	7981.29	6177.93
52	6:6PFPiA	40143-77-9	303	4.0003e+06	4.0003e+06	4.00042e+06	4.00043e+06	4.0004e+06	4.00032e+06	4.00023e+06	4.00029e+06	4.00029e+06	97568.3	97568.3	97571.2	97571.4	97570.8	97568.7	97566.6	97568.1	97568.1	32045.2	29604.9	22306.7	24603.3	24965.1	27104.1	22738.1	22367.5	26977.4	20511.1	20181	18228.1	18045.7	24432.5	15907	25795.7	15652.9	17621.3	22014.3	20811.1	16146.2	4876	13160.9	12587.9	10746	10079.7	9126.85	7075.75
53	8:8PFPiA	40143-79-1	349.2	4.00048e+06	4.00048e+06	4.00068e+06	4.00069e+06	4.00065e+06	4.00051e+06	4.00036e+06	4.00047e+06	4.00047e+06	75480.8	75480.8	75484.6	75484.8	75484	75481.4	75478.6	75480.6	75480.6	42048.3	39608	30809.7	34606.4	33873.1	37107.2	31646.1	32105.6	35885.4	29419.1	28684	27192.1	26558.2	32935.5	24432.5	34298.7	24965.1	29604.9	28797.7	26482.9	21006.6	10048	17045.6	16052.5	13856.4	13015.3	11529.4	9152.41
54	6:2diPAP	57677-95-9	300.6	4.00034e+06	4.00034e+06	4.00041e+06	4.00042e+06	4.00033e+06	4.00033e+06	4.00033e+06	4.00035e+06	4.00034e+06	85113.5	85113.5	85115.2	85115.2	85113.4	85113.3	85113.4	85113.8	85113.7	29685.3	26293.7	26653.9	22367	27568.8	23717.8	24877	18499	29832.1	22794.4	24506.3	20156	22114	29266	19835.5	30793.4	17914.9	14200.8	25385.6	20912.2	20519	9144	16091.5	13685	13121.5	12437.1	10432.1	9164.04
55	6:2/8:2diPAP	943913-15-3	324	1281.22	1281.22	916.035	960.324	745.581	696.381	617.599	720.635	755.937	24.174	24.174	17.2837	18.1193	14.0676	13.1393	11.6528	13.5969	14.263	34686.8	31295.3	30905.4	27368.5	32022.8	28719.4	29331	23500.6	34286.1	27248.4	28757.8	24610	26365.5	33517.5	24134.1	35045	22256.4	19453.8	28777.4	23748.1	22949.2	12576	18033.9	15417.3	14676.7	13905	11633.4	10202.4
56	8:2diPAP	678-41-1	345.6	4.0005e+06	4.0005e+06	4.00061e+06	4.00061e+06	4.00048e+06	4.00048e+06	4.0005e+06	4.00052e+06	4.00051e+06	67805.1	67805.1	67807	67807	67804.8	67804.7	67805.1	67805.4	67805.3	39688.4	36296.8	35156.9	32370.1	36476.8	33721	33785	28502.2	38740.1	31702.4	33009.3	29064	30617	37769	28432.8	39296.5	26598	24706.8	32169.1	26584	25379.4	16836	19976.2	17149.6	16231.9	15372.8	12834.7	11240.7
57	diSAmPAP	2965-52-8	373.2	4.00069e+06	4.00069e+06	4.00079e+06	4.00079e+06	4.00065e+06	4.00066e+06	4.00082e+06	4.00071e+06	4.00071e+06	56347.7	56347.7	56349.2	56349.2	56347.2	56347.3	56349.6	56348.1	56348	49647.8	46942	53099.2	43172.8	51488.1	44597	49250.9	40075.9	50823.2	46872.2	48301.9	45569.8	46181	48781.8	44832.3	48250.8	42521.5	35813.9	40663.8	33509.7	32500.1	27976	25612.6	21208.8	20782.6	19108.1	17348.7	14525.4
58	Cl-PFOPA	2252239-09-9	188.4	4.00015e+06	4.00015e+06	383.265	382.296	334.904	646.968	1027.66	1966.82	1668.6	137936	137936	13.216	13.1826	11.5484	22.3092	35.4367	67.8213	57.5378	22114.8	19627.2	13809.4	14624.6	16271.8	17125.4	14013.7	12123.8	18499	11786.7	11683.6	9559.68	9557.87	16120	7432.11	17853.9	7332.68	9623.02	15666.6	14871	11065.4	1864	9552.68	9915.15	8032.93	7075.54	6977.6	5089.43
[truncated: 605 more columns]

## Sheet: Table S4 Train_12Xs
ID	Name	CAS	RTs	nAcid	AATS5v	AATSC1v	ATS4s	ATSC2i	ATSC3m	MDEC-44	MWC10	SpMax6_Bhm	maxsOH	mindssC	minssCH2
1	PFBA	375-22-4	129	1	159.721	1.90284	665.5	-27.9449	105.806	2.3811	11.4497	1.58175	7.41021	-3.53257	0
2	PFPeA	2706-90-3	159	1	196.402	1.67569	960.25	-43.0837	106.295	3.96541	11.8888	1.73407	7.47526	-3.79035	0
3	PFHxA	307-24-4	187	1	213.416	1.48657	1257.81	-57.5394	105.506	5.67624	12.2042	2.36453	7.51926	-3.9906	0
4	PFHpA	375-85-9	208	1	221.923	1.33159	1555.38	-71.5585	104.325	7.47342	12.446	2.47087	7.55066	-4.14972	0
5	PFOA	335-67-1	226	1	227.027	1.2039	1852.94	-85.2824	103.07	9.33326	12.6412	2.59555	7.57399	-4.27882	0
6	PFNA	375-95-1	243	1	230.43	1.09751	2150.5	-98.7974	101.861	11.2406	12.8044	2.72289	7.59191	-4.38549	0
7	PFDA	335-76-2	259	1	232.861	1.00782	2448.06	-112.159	100.739	13.1851	12.9448	2.84477	7.60602	-4.47501	0
8	PFUnDA	2058-94-8	274	1	234.684	0.931325	2745.62	-125.406	99.7147	15.1596	13.0678	2.9572	7.6174	-4.55117	0
9	PFDoDA	307-55-1	289	1	236.102	0.865404	3043.19	-138.563	98.7857	17.1586	13.1774	3.05869	7.62672	-4.61672	0
10	PFTrDA	72629-94-8	303	1	237.236	0.808054	3340.75	-151.65	97.9445	19.1782	13.2761	3.14916	7.6345	-4.67372	0
11	PFTeDA	376-06-7	316	1	238.164	0.757735	3638.31	-164.681	97.1823	21.2152	13.366	3.22927	7.64106	-4.72373	0
12	PFHxDA	67905-19-5	341	1	239.592	0.673644	4233.44	-190.612	95.8607	25.332	13.5245	3.3624	7.6515	-4.80732	0
13	PFODA	16517-11-6	364	1	240.639	0.606223	4828.56	-216.415	94.76	29.4944	13.6614	3.46627	7.65941	-4.87441	0
14	FHEA	53826-12-3	215	1	210.814	0.801579	1601.75	-51.2787	-12.3747	7.47342	12.4324	2.53493	7.79621	-2.93391	-3.23288
15	FOEA	27854-31-5	237	1	221.28	0.748136	2196.88	-78.6125	25.668	11.2406	12.795	2.82973	7.82825	-3.13011	-3.47982
16	FDEA	53826-13-4	268	1	227.094	0.684087	2792	-105.39	48.7636	15.1596	13.0605	3.05868	7.84895	-3.27182	-3.6531
17	FHUEA	70887-88-6	201	1	224.248	1.20018	1357.73	-52.3541	122.444	5.67624	12.2847	2.49877	7.79462	-3.84477	0
18	FOUEA	70887-84-2	236	1	231.704	1.01192	1952.85	-80.6506	139.349	9.33326	12.694	2.77613	7.82665	-4.13299	0
19	FDUEA	70887-94-4	267	1	235.533	0.871262	2547.98	-108.098	147.9	13.1851	12.984	3.01422	7.84735	-4.32918	0
20	FPrPA	356-02-5	146	1	160.342	0.0144543	589.375	3.88142	446.48	2.3811	11.4149	1.7448	7.88586	-1.88181	-2.07456
21	FPePA	914637-49-3	200	1	192.684	0.370973	1182.81	-22.8138	731.772	5.67624	12.1825	2.43339	7.94059	-2.17003	-2.55669
22	FHpPA	812-70-4	239	1	208.33	0.473395	1777.94	-49.4077	892.048	9.33326	12.6268	2.73432	7.97262	-2.36622	-2.85889
23	ADONA	919005-14-4	215	1	222.801	-1.78286	1217.54	-18.6107	52.7901	3.71151	12.0524	2.5282	7.70003	-3.51165	0
24	HFPO-DA	13252-13-6	194	1	225.844	-0.182587	1048.88	-16.9093	101.284	4.5088	12.0508	2.36147	7.72051	-3.88644	0
25	HFPO-TA	13252-14-7	251	1	237.527	-1.04608	1768.31	-20.5179	89.7697	9.19158	12.6316	3.1189	7.85374	-4.28557	0
26	PFBS	375-73-5	185	1	208.718	1.32995	1057.84	-39.3717	93.8905	3.96541	12.0588	1.8131	7.6998	0	0
27	PFPeS	2706-91-4	209	1	221.27	1.1435	1355.4	-53.6444	93.8989	5.67624	12.3324	2.37216	7.7438	0	0
28	PFHxS	355-46-4	229	1	227.31	1.00268	1652.97	-67.5548	93.9052	7.47342	12.5486	2.4938	7.7752	0	0
29	PFHpS	375-92-8	247	1	231.085	0.892633	1950.53	-81.2115	93.91	9.33326	12.7263	2.63581	7.79853	0	0
30	PFOS	1763-23-1	263	1	233.668	0.804287	2248.09	-94.6839	93.9139	11.2406	12.8772	2.77903	7.81644	0	0
31	PFNS	68259-12-1	278	1	235.547	0.731818	2545.65	-108.019	93.9171	13.1851	13.0083	2.91356	7.83056	0	0
32	PFDS	335-77-3	293	1	236.974	0.671305	2843.22	-121.248	93.9198	15.1596	13.1242	3.03499	7.84193	0	0
33	PFDoS	79780-39-5	320	1	239.001	0.576006	3438.34	-147.474	93.9239	19.1782	13.3221	3.23567	7.85903	0	0
34	4:2FTS	757124-72-4	179	1	187.683	0.672961	884.84	-4.51124	23.7558	3.96541	11.9286	2.353	8.14179	0	-2.5408
35	6:2FTS	27619-97-2	219	1	206.555	0.608355	1479.97	-29.9879	188.461	7.47342	12.468	2.60572	8.18304	0	-2.91819
36	8:2FTS	39108-34-4	252	1	216.369	0.542127	2075.09	-55.658	292.278	11.2406	12.8198	2.90187	8.20853	0	-3.16513
37	10:2FTS	120226-60-0	282	1	222.383	0.484678	2670.22	-81.3481	363.502	15.1596	13.0797	3.14266	8.22563	0	-3.33842
38	PFECHS	1135682-88-0	245	1	200.927	1.72309	2877.99	-0.484096	59.582	13.8563	13.3244	2.70554	8.36658	0	0
39	6:2 Cl-PFESA	756426-58-1	274	1	245.142	-0.125926	1977.49	-94.8039	158.247	9.9794	12.7705	2.93915	7.89788	0	0
40	8:2 Cl-PFESA	763051-92-9	304	1	245.718	-0.106625	2572.62	-122.564	161.53	13.93	13.0418	3.21821	7.90632	0	0
41	FOSA	754-91-6	313	0	227.069	2.15915	2230.84	-93.4046	192.119	11.2406	12.8772	2.7801	0	0	0
42	N-MeFOSA-M	31506-32-8	365	0	219.152	-0.420316	2267.97	-88.945	187.804	11.2406	12.9043	2.81488	0	0	0
43	N-EtFOSA-M	4151-50-2	377	0	213.665	-0.4834	2278.56	-80.7376	1499.83	11.2406	12.9166	3.04333	0	0	-1.2655
44	FOSAA	2806-24-8	253	1	226.855	1.18451	2291.22	-83.0898	200.869	11.2406	12.9342	3.07189	8.02341	-2.48117	-2.29328
45	N-MeFOSAA	2355-31-9	260	1	212.402	-0.95639	2369.09	-73.2244	-578.621	11.2406	12.984	3.07497	8.21466	-2.44645	-2.22384
46	N-EtFOSAA	2991-50-6	267	1	200.522	-0.998824	2378.36	-68.2304	781.133	11.2406	13.0038	3.09473	8.34578	-2.42853	-2.19953
47	N-MeFOSE-M	24448-09-7	361	0	196.974	-1.11697	2354.43	-70.3239	695.349	11.2406	12.97	3.06565	8.36744	0	-1.57106
48	N-EtFOSE-M	1691-99-2	374	0	187.643	-1.13802	2366.03	-65.9862	1922.85	11.2406	12.9891	3.06574	8.49855	0	-1.54675
49	PFHxPA	40143-76-8	136	2	217.338	3.19505	1653.75	-64.4866	191.86	7.47342	12.5486	2.49206	7.88939	0	0
50	PFOPA	40143-78-0	182	2	226.37	2.60511	2248.88	-91.7602	192.138	11.2406	12.8772	2.77439	7.93064	0	0
51	PFDPA	52299-26-0	216	2	231.233	2.19801	2844	-118.454	192.042	15.1596	13.1242	3.02885	7.95613	0	0
52	6:6PFPiA	40143-77-9	303	1	236.856	1.1235	3404.69	-115.567	153.719	17.2931	13.3221	3.17415	8.46783	0	0
53	8:8PFPiA	40143-79-1	349	1	239.743	0.872766	4594.94	-167.033	154.322	25.3299	13.629	3.43702	8.55032	0	0
54	6:2diPAP	57677-95-9	301	1	197.437	-1.40358	3055.28	-73.6882	585.898	11.986	13.1535	3.32866	9.06953	0	-3.3579
55	6:2/8:2diPAP	943913-15-3	324	1	203.688	-1.22825	3650.4	-100.206	672.695	15.4057	13.3461	3.52327	9.09023	0	-3.60484
56	8:2diPAP	678-41-1	346	1	208.55	-1.09067	4245.53	-126.562	741.688	18.737	13.5076	3.52665	9.11093	0	-3.70324
57	diSAmPAP	2965-52-8	373	1	187.981	-2.14353	4838.18	-115.448	2001.7	16.4324	13.7138	3.71228	9.67017	0	-2.32568
58	Cl-PFOPA	2252239-09-9	188	2	233.561	2.71028	2134.09	-109.295	188.025	11.2406	12.8772	2.84898	7.98563	0	0

## Sheet: Table S5
Table S5. Explanations of 12 selected molecular descriptors for modelling
Class	Descriptor	Description
Autocorrelation Descriptor	ATS4s	Broto-Moreau autocorrelation - lag 4 / weighted by I-state
	AATSC1v	Average centered Broto-Moreau autocorrelation - lag 1 / weighted by van der Waals volumes
	ATSC3m	Centered Broto-Moreau autocorrelation - lag 3 / weighted by mass
	ATSC2i	Centered Broto-Moreau autocorrelation - lag 2 / weighted by first ionization potential
	AATS5v	Average Broto-Moreau autocorrelation - lag 5 / weighted by van der Waals volumes
Electrotopological State Atom Type Descriptor	maxsOH	Maximum atom-type E-State: -OH
	mindssC	Minimum atom-type E-State: =C<
	minssCH2	Minimum atom-type E-State: -CH2-
Burden Modified Eigenvalues Descriptor	SpMax6_Bhm	Largest absolute eigenvalue of Burden modified matrix - n 6 / weighted by relative mass
Molecular distance edge Descriptor	MDEC-44	Molecular distance edge between all quaternary carbons
Walk Count Descriptor	MWC10	Molecular walk counts of order 10 (ln(1+x))
Acidic Group Count Descriptor	nAcid	Number of acidic groups

## Sheet: Table S6 NormanPFAS AD
ID	Name	Abbr.Name	CAS	SMILES_original	SMILES_MS_ready	Formula	0.AATSC1v	1.ATS4s	2.MDEC-44	3.MWC10	4.AATS5v	5.ATSC3m	6.SpMax6_Bhm	7.maxsOH	8.mindssC	9.ATSC2i	10.minssCH2	11.nAcid	Euclidean distance to Mean ( i.e. sum(x1..xn)/n)	in domain	Consensus domain	Training
1	6:3 Fluorotelomer carboxylic acid		CAS_RN: 27854-30-4	C(CC(C(C(C(C(C(F)(F)F)(F)F)(F)F)(F)F)(F)F)(F)F)C(=O)O	O=C(O)CCC(F)(F)C(F)(F)C(F)(F)C(F)(F)C(F)(F)C(F)(F)F	C9H5F13O2	0.4384	1480.38	7.47342	12.4285	201.811	821.916	2.58111	7.9585	-2.27669	-36.1373	-2.72362	1	0.722203	TRUE	1	0
2	(2Z)-4,4,5,5,6,6,6-Heptafluoro-2-iodohex-2-en-1-ol		CAS_RN: 92835-92-2	OCC(I)=CC(F)(F)C(F)(F)C(F)(F)F	OCC(I)=CC(F)(F)C(F)(F)C(F)(F)F	C6H4F7IO	1.4004	542.58	2.3811	11.4651	213.732	-5389.46	2.19153	8.2998	-0.433144	13.7051	-0.915933	0	2.49018	FALSE	0	0
3	4,4,5,5,6,6,6-heptafluoro-2-iodohex-2-en-1-ol		CAS_RN: 92835-82-0	OCC(I)=CC(F)(F)C(F)(F)C(F)(F)F	OCC(I)=CC(F)(F)C(F)(F)C(F)(F)F	C6H4F7IO	1.4004	542.58	2.3811	11.4651	213.732	-5389.46	2.19153	8.2998	-0.433144	13.7051	-0.915933	0	2.49018	FALSE	0	0
4	Perfluoro-N,N,N',N'-tetrakis(heptafluoropropyl)-1,6-hexanediamine		CAS_RN: 143356-32-5	FC(F)(F)C(F)(F)C(F)(F)N(C(F)(F)C(F)(F)C(F)(F)F)C(F)(F)C(F)(F)C(F)(F)C(F)(F)C(F)(F)C(F)(F)N(C(F)(F)C(F)(F)C(F)(F)F)C(F)(F)C(F)(F)C(F)(F)F	FC(F)(F)C(F)(F)C(F)(F)N(C(F)(F)C(F)(F)C(F)(F)F)C(F)(F)C(F)(F)C(F)(F)C(F)(F)C(F)(F)C(F)(F)N(C(F)(F)C(F)(F)C(F)(F)F)C(F)(F)C(F)(F)C(F)(F)F	C18F40N2	-2.1199	4988.25	31.6147	13.7213	253.751	3.86562	3.59439	0	0	-110.141	0	0	1.63829	FALSE	0	0
5	Ammonium perfluoro-9-(methyl)decanoate		CAS_RN: 3658-63-7	[H][NH+]([H])[H].[O-]C(=O)C(F)(F)C(F)(F)C(F)(F)C(F)(F)C(F)(F)C(F)(F)C(F)(F)C(F)(C(F)(F)F)C(F)(F)F	O=C(O)C(F)(F)C(F)(F)C(F)(F)C(F)(F)C(F)(F)C(F)(F)C(F)(F)C(F)(C(F)(F)F)C(F)(F)F	C11HF21O2	0.9313	3321.63	15.6749	13.113	234.684	-21.0883	3.08087	7.6201	-4.56454	-87.4295	0	1	0.706035	TRUE	1	0
6	2,3,3,3-Tetrafluoro-2-(trifluoromethyl)propanenitrile		CAS_RN: 42532-60-5	FC(F)(F)C(F)(C#N)C(F)(F)F	N#CC(F)(C(F)(F)F)C(F)(F)F	C4F7N	-1.9725	864	2.3811	11.3163	0	-81.6405	1.58175	0	0	-1.1107	0	0	3.01465	FALSE	0	0
7	6:2 Fluorotelomer thiohydroxy ammonium chloride		CAS_RN: 88992-45-4	[Cl-].C[N+](C)(C)CC(O)CSCCC(F)(F)C(F)(F)C(F)(F)C(F)(F)C(F)(F)C(F)(F)F	C[N+](C)(C)CC(O)CSCCC(F)(F)C(F)(F)C(F)(F)C(F)(F)C(F)(F)C(F)(F)F	C14H19F13NOS	-2.2509	1569.76	7.47342	12.4999	165.554	1126.52	3.00995	9.6687	0	15.1203	-2.12722	0	1.28564	TRUE	1	0
8	5,6-dibromo-1,1,1,2,2,3,3,4,4-nonafluorohexane		CAS_RN: 236736-19-9	FC(F)(F)C(F)(F)C(F)(F)C(F)(F)C(Br)CBr	FC(F)(F)C(F)(F)C(F)(F)C(F)(F)C(Br)CBr	C6H3Br2F9	-1.279	827.36	3.96541	11.936	227.682	604.412	2.46301	0	0	-5.3671	-0.332406	0	1.33274	TRUE	1	0
9	2H,2H,3H,3H-Perfluorooctanoic acid	FPePA	CAS_RN: 914637-49-3	C(CC(C(C(C(C(F)(F)F)(F)F)(F)F)(F)F)(F)F)C(=O)O	O=C(O)CCC(F)(F)C(F)(F)C(F)(F)C(F)(F)C(F)(F)F	C8H5F11O2	0.371	1182.81	5.67624	12.1825	192.684	731.772	2.43339	7.9406	-2.17003	-22.8138	-2.55669	1	0.828855	TRUE	1	1
10	Octadecyl 2,2,3,3,4,4,4-heptafluorobutanoate		CAS_RN: 400-57-7	CCCCCCCCCCCCCCCCCCOC(=O)C(F)(F)C(F)(F)C(F)(F)F	CCCCCCCCCCCCCCCCCCOC(=O)C(F)(F)C(F)(F)C(F)(F)F	C22H37F7O2	-2.0279	868.71	2.3811	11.7109	122.564	3291.44	3.23517	0	-2.85113	22.2233	-0.610313	0	2.14518	FALSE	0	0
11	Vinyl perfluorovalerate		CAS_RN: 424-37-3	FC(F)(F)C(F)(F)C(F)(F)C(F)(F)C(=O)OC=C	C=COC(=O)C(F)(F)C(F)(F)C(F)(F)C(F)(F)F	C7H3F9O2	-3.4014	970.71	3.96541	11.9585	209.681	615.131	2.37306	0	-3.28572	-30.0524	0	0	1.45006	FALSE	0	0
12	Methyl Perfluorododecanoate		CAS_RN: 56554-52-0	COC(=O)C(F)(F)C(F)(F)C(F)(F)C(F)(F)C(F)(F)C(F)(F)C(F)(F)C(F)(F)C(F)(F)C(F)(F)C(F)(F)F	COC(=O)C(F)(F)C(F)(F)C(F)(F)C(F)(F)C(F)(F)C(F)(F)C(F)(F)C(F)(F)C(F)(F)C(F)(F)C(F)(F)F	C13H3F23O2	-1.5484	3042.06	17.1586	13.1909	229.129	348.363	3.0889	0	-4.02876	-135.144	0	0	1.20592	TRUE	1	0
13	perfluoroalkylamido betaine-related, n=12		NA	C(NCCC[N+](CC(O)=O)(C)C)(=O)C(F)(F)C(F)(F)C(F)(F)C(F)(F)C(F)(F)C(F)(F)C(F)(F)C(F)(F)C(F)(F)C(F)(F)C(F)(F)C(F)(F)F	C[N+](C)(CCCNC(=O)C(F)(F)C(F)(F)C(F)(F)C(F)(F)C(F)(F)C(F)(F)C(F)(F)C(F)(F)C(F)(F)C(F)(F)C(F)(F)C(F)(F)F)CC(=O)O	C20H15F25N2O3	-1.4333	3519.29	19.1782	13.3409	185.162	3151.31	3.39697	8.6401	-3.88804	-91.2325	-1.4211	1	1.40821	FALSE	0	0
14	1,1,1,2,2,3,3,4,4,5,5,6,6,7,7,8,8,9,9,10,10-Henicosafluorodocosane		CAS_RN: 93454-71-8	CCCCCCCCCCCCC(F)(F)C(F)(F)C(F)(F)C(F)(F)C(F)(F)C(F)(F)C(F)(F)C(F)(F)C(F)(F)C(F)(F)F	CCCCCCCCCCCCC(F)(F)C(F)(F)C(F)(F)C(F)(F)C(F)(F)C(F)(F)C(F)(F)C(F)(F)C(F)(F)C(F)(F)F	C22H25F21	-0.8994	2743.63	15.1596	13.0678	165.631	6404.93	3.35053	0	0	-17.3016	-2.5038	0	2.74078	FALSE	0	0
15	1,1,1,3,4,4,4-Heptafluoro-3-(trifluoromethyl)butan-2-one		CAS_RN: 756-12-7	FC(F)(F)C(=O)C(F)(C(F)(F)F)C(F)(F)F	O=C(C(F)(F)F)C(F)(C(F)(F)F)C(F)(F)F	C5F10O	-1.6091	0	3.30193	11.8614	177.044	-98.9343	1.58175	0	-4.55556	15.3972	0	0	1.69816	FALSE	0	0
16	Diammonium 4,4,5,5,6,6,7,7,8,8,9,9,10,10,11,11,12,12,13,13,14,14,15,15,16,16,17,17,17-nonacosafluoro-2-hydroxyheptadecyl phosphate		CAS_RN: 94200-48-3	[NH4+].[NH4+].OC(COP(=O)([O-])[O-])CC(F)(F)C(F)(F)C(F)(F)C(F)(F)C(F)(F)C(F)(F)C(F)(F)C(F)(F)C(F)(F)C(F)(F)C(F)(F)C(F)(F)C(F)(F)C(F)(F)F	O=P(O)(O)OCC(O)CC(F)(F)C(F)(F)C(F)(F)C(F)(F)C(F)(F)C(F)(F)C(F)(F)C(F)(F)C(F)(F)C(F)(F)C(F)(F)C(F)(F)C(F)(F)C(F)(F)F	C17H8F29O5P	1.1466	3992.23	23.2671	13.4717	217.106	825.498	3.48346	8.9242	0	-131.619	-3.66537	2	1.23778	TRUE	1	0
17	2,3,4,4,5,5,5-Heptafluoro-3-(pentafluoroethyl)-2-(trifluoromethyl)pentanoic acid		CAS_RN: 1882109-66-1	OC(=O)C(F)(C(F)(F)F)C(F)(C(F)(F)C(F)(F)F)C(F)(F)C(F)(F)F	O=C(O)C(F)(C(F)(F)F)C(F)(C(F)(F)C(F)(F)F)C(F)(F)C(F)(F)F	C8HF15O2	1.2039	1889.19	10.3248	12.8038	210.919	55.2904	2.65965	7.8255	-4.82375	-9.3296	0	1	0.784083	TRUE	1	0
18	Perfluoropentanesulfonic acid	PFPeS	CAS_RN: 2706-91-4	O=[S](=O)(O)C(F)(F)C(F)(F)C(F)(F)C(F)(F)C(F)(F)F	O=S(=O)(O)C(F)(F)C(F)(F)C(F)(F)C(F)(F)C(F)(F)F	C5HF11O3S	1.1435	1355.4	5.67624	12.3324	221.27	93.8989	2.37216	7.7438	0	-53.6444	0	1	0.685427	TRUE	1	1
19	Lithium bis[(pentafluoroethyl)sulfonyl]azanide		CAS_RN: 132843-44-8	[Li+].FC(F)(F)C(F)(F)S(=O)(=O)[N-]S(=O)(=O)C(F)(F)C(F)(F)F	O=S(=O)(NS(=O)(=O)C(F)(F)C(F)(F)F)C(F)(F)C(F)(F)F	C4HF10NO4S2	-0.6443	1070.24	2.06598	12.1623	237.15	230.221	2.59925	0	0	-5.6807	0	0	1.29594	TRUE	1	0
20	Bis(2-hydroxyethyl)methyl(1-(perfluoro-9-methyldecyl))-2-hydroxyprop-3-ylammonium iodide		CAS_RN: 94159-77-0	[I-].C[N+](CCO)(CCO)CC(O)CC(F)(F)C(F)(F)C(F)(F)C(F)(F)C(F)(F)C(F)(F)C(F)(F)C(F)(F)C(F)(C(F)(F)F)C(F)(F)F	C[N+](CCO)(CCO)CC(O)CC(F)(F)C(F)(F)C(F)(F)C(F)(F)C(F)(F)C(F)(F)C(F)(F)C(F)(F)C(F)(C(F)(F)F)C(F)(F)F	C19H19F23NO3	-0.4227	3793.15	17.6682	13.2825	163.382	3093.09	3.21821	9.604	0	-27.4069	-3.24197	0	1.66417	FALSE	0	0
21	3-Methyl-2-(nonafluorobutyl)-1H-indole		CAS_RN: 1622133-36-1	Cc1c(Nc2ccccc12)C(F)(F)C(F)(F)C(F)(F)C(F)(F)F	Cc1c(C(F)(F)C(F)(F)C(F)(F)C(F)(F)F)[nH]c2ccccc12	C13H8F9N	1.6025	980.13	3.96541	12.4431	184.679	1113.39	2.76978	0	0	40.6254	0	0	1.40921	FALSE	0	0
22	N-Nitrosobis(2,2,3,3,4,4,4-heptafluorobutyl)amine		CAS_RN: 83329-16-2	FC(F)(F)C(F)(F)C(F)(F)CN(CC(F)(F)C(F)(F)C(F)(F)F)N=O	O=NN(CC(F)(F)C(F)(F)C(F)(F)F)CC(F)(F)C(F)(F)C(F)(F)F	C8H4F14N2O	-2.6803	1189.31	4.72177	12.1971	183.948	56.31	2.60184	0	0	-44.1253	-3.31296	0	1.52129	FALSE	0	0
23	1,1'-(Oxybis((2-methylethylene)oxy))bis(3-(perfluoro-9-methyldecyl)propan-2-ol)		CAS_RN: 93776-04-6	CC(OCC(O)CC(F)(F)C(F)(F)C(F)(F)C(F)(F)C(F)(F)C(F)(F)C(F)(F)C(F)(F)C(C(F)(F)F)(F)C(F)(F)F)COCC(OCC(O)CC(F)(F)C(F)(F)C(F)(F)C(F)(F)C(F)(F)C(F)(F)C(F)(F)C(F)(F)C(C(F)(F)F)(F)C(F)(F)F)C	CC(COCC(C)OCC(O)CC(F)(F)C(F)(F)C(F)(F)C(F)(F)C(F)(F)C(F)(F)C(F)(F)C(F)(F)C(F)(C(F)(F)F)C(F)(F)F)OCC(O)CC(F)(F)C(F)(F)C(F)(F)C(F)(F)C(F)(F)C(F)(F)C(F)(F)C(F)(F)C(F)(C(F)(F)F)C(F)(F)F	C34H24F46O5	-0.5827	7352.9	0	13.9351	195.036	4089.63	3.69236	9.5079	0	-69.4161	-3.64991	0	2.28401	FALSE	0	0
24	Cl-substituted perfluoroalkyl (linear) carboyxlic acids_i, n=10		CAS_RN: 2823-49-6	OC(C(F)(F)C(F)(F)C(F)(F)C(F)(F)C(F)(F)C(F)(F)C(F)(F)C(F)(F)C(F)(F)C(F)(F)Cl)=O	O=C(O)C(F)(F)C(F)(F)C(F)(F)C(F)(F)C(F)(F)C(F)(F)C(F)(F)C(F)(F)C(F)(F)C(F)(F)Cl	C11HClF20O2	1.0532	2630.84	15.1596	13.0678	240.677	86.4927	3.02514	7.6568	-4.50496	-141.478	0	1	0.714906	TRUE	1	0
25	4,4,5,5,6,6,6-Heptafluorohexyl acetate		CAS_RN: 25600-64-0	CC(=O)OCCCC(F)(F)C(F)(F)C(F)(F)F	CC(=O)OCCCC(F)(F)C(F)(F)C(F)(F)F	C8H9F7O2	-4.0977	600.46	2.3811	11.4288	139.729	705.996	2.23878	0	-0.837132	8.3245	-1.72938	0	1.90235	FALSE	0	0
26	perfluoroalkanesulfonamido quaternary ammonium dicarboxylate A, n=6		NA	S(N(CC(O)=O)CCC[N+](CC(O)=O)(C)C)(=O)(=O)C(F)(F)C(F)(F)C(F)(F)C(F)(F)C(F)(F)C(F)(F)F	C[N+](C)(CCCN(CC(=O)O)S(=O)(=O)C(F)(F)C(F)(F)C(F)(F)C(F)(F)C(F)(F)C(F)(F)F)CC(=O)O	C15H17F13N2O6S	-2.3694	1947.77	7.47342	12.8139	167.84	1217.46	3.2523	8.7206	-2.36327	-8.0743	-2.14146	2	1.1826	TRUE	1	0
27	1,1,1,2,2,3,3,4,4,5,5,6,6,7,7,8,8,9,9,10,10,11,11,12,12-Pentacosafluorohexadecane		CAS_RN: 89109-69-3	CCCCC(F)(F)C(F)(F)C(F)(F)C(F)(F)C(F)(F)C(F)(F)C(F)(F)C(F)(F)C(F)(F)C(F)(F)C(F)(F)C(F)(F)F	CCCCC(F)(F)C(F)(F)C(F)(F)C(F)(F)C(F)(F)C(F)(F)C(F)(F)C(F)(F)C(F)(F)C(F)(F)C(F)(F)C(F)(F)F	C16H9F25	-0.8197	3240.63	19.1782	13.2604	211.304	3200.81	3.22341	0	0	-97.8288	-2.65964	0	1.67058	FALSE	0	0
28	double bond-perfluoroalkyl alcohols, n=3		NA	OC(F)(F)C(F)(F)C(F)(F)/C(F)=C(C(F)(F)F)F	OC(F)(F)C(F)(F)C(F)(F)C(F)=C(F)C(F)(F)F	C6HF11O	1.5948	954.23	2.7016	11.8635	214.422	-18.7041	2.03833	7.3582	-4.46414	-56.6169	0	0	1.11	TRUE	1	0
29	Chromium(3+) perfluorooctanoate		CAS_RN: 68141-02-6	[Cr+3].[O-]C(=O)C(F)(F)C(F)(F)C(F)(F)C(F)(F)C(F)(F)C(F)(F)C(F)(F)F.[O-]C(=O)C(F)(F)C(F)(F)C(F)(F)C(F)(F)C(F)(F)C(F)(F)C(F)(F)F.[O-]C(=O)C(F)(F)C(F)(F)C(F)(F)C(F)(F)C(F)(F)C(F)(F)C(F)(F)F	O=C(O)C(F)(F)C(F)(F)C(F)(F)C(F)(F)C(F)(F)C(F)(F)C(F)(F)F	C8HF15O2	1.2039	1852.94	9.33326	12.6412	227.027	103.07	2.59555	7.574	-4.27882	-85.2824	0	1	0.615412	TRUE	1	0
30	2-Propenoic acid, 2-methyl-, 2-[methyl[(undecafluoropentyl)sulfonyl]amino]ethyl ester		CAS_RN: 67584-60-5	C(N([S](=O)(=O)C(F)(F)C(F)(F)C(F)(F)C(F)(F)C(F)(F)F)C)COC(=O)C(=C)C	C=C(C)C(=O)OCCN(C)S(=O)(=O)C(F)(F)C(F)(F)C(F)(F)C(F)(F)C(F)(F)F	C12H12F11NO4S	-3.5577	1554.94	5.67624	12.5383	183.198	692.705	2.94207	0	-1.17406	-5.6535	-1.30096	0	1.41246	FALSE	0	0
31	3-(Perfluoropentyl)-5-methylpyrazole		CAS_RN: 82633-43-0	CC1=CC(=NN1)C(F)(F)C(F)(F)C(F)(F)C(F)(F)C(F)(F)F	Cc1cc(C(F)(F)C(F)(F)C(F)(F)C(F)(F)C(F)(F)F)n[nH]1	C9H5F11N2	0.3049	1216.44	5.67624	12.3878	223.021	600.955	2.52454	0	0	-30.4892	0	0	1.17868	TRUE	1	0
32	Methyl 3-amino-4,4,5,5,6,6,6-heptafluorohex-2-enoate		CAS_RN: 106203-17-2	COC(=O)C=C(N)C(F)(F)C(F)(F)C(F)(F)F	COC(=O)C=C(N)C(F)(F)C(F)(F)C(F)(F)F	C7H6F7NO2	-0.2744	700.79	2.3811	11.6375	169.529	449.281	2.42133	0	-2.24382	-0.4893	0	0	1.44773	FALSE	0	0
33	2H-Hexafluoropropyl allyl ether		CAS_RN: 59158-81-5	FC(C(F)(F)F)C(F)(F)OCC=C	C=CCOC(F)(F)C(F)C(F)(F)F	C6H6F6O	-5.3911	568.71	0.5	10.9062	176.866	268.803	1.58175	0	0	12.0875	-0.857639	0	2.04813	FALSE	0	0
34	1,1,1,2,2,3,3,4,4,5,5-Undecafluoroheptane		CAS_RN: 503189-10-4	CCC(F)(F)C(F)(F)C(F)(F)C(F)(F)C(F)(F)F	CCC(F)(F)C(F)(F)C(F)(F)C(F)(F)C(F)(F)F	C7H5F11	-2.0652	1134.19	5.67624	12.1183	177.706	1187.58	2.37454	0	0	-34.7044	-2.03817	0	1.44962	FALSE	0	0
35	Ethenyl tridecafluoroheptanoate		CAS_RN: 240408-96-2	FC(F)(F)C(F)(F)C(F)(F)C(F)(F)C(F)(F)C(F)(F)C(=O)OC=C	C=COC(=O)C(F)(F)C(F)(F)C(F)(F)C(F)(F)C(F)(F)C(F)(F)F	C9H3F13O2	-2.473	1565.83	7.47342	12.4871	224.458	649.671	2.64606	0	-3.64509	-60.7641	0	0	1.24749	TRUE	1	0
36	8-H-Perfluorooctanoic acid		CAS_RN: 13973-14-3	OC(=O)C(F)(F)C(F)(F)C(F)(F)C(F)(F)C(F)(F)C(F)(F)C(F)F	O=C(O)C(F)(F)C(F)(F)C(F)(F)C(F)(F)C(F)(F)C(F)(F)C(F)F	C8H2F14O2	1.0063	1733.63	7.47342	12.5481	218.92	105.436	2.57497	7.593	-4.20193	-98.4687	0	1	0.623499	TRUE	1	0
37	double bond-perfluoroalkyl alcohols, n=2		NA	OC(F)(F)C(F)(F)/C(F)=C(C(F)(F)F)F	OC(F)(F)C(F)(F)C(F)=C(F)C(F)(F)F	C5HF9O	1.8184	611.9	1.31037	11.4379	204.286	-24.4722	1.809	7.3389	-4.08102	-42.283	0	0	1.26902	TRUE	1	0
38	1-(3,3,4,4,5,5,6,6,7,7,8,8,9,9,10,10,10-Heptadecafluoro-1-iododecyl)-2,8,9-trioxa-5-aza-1-silabicyclo[3.3.3]undecane		CAS_RN: 135587-17-6	FC(F)(F)C(F)(F)C(F)(F)C(F)(F)C(F)(F)C(F)(F)C(F)(F)C(F)(F)CC(I)[Si]12OCCN(CCO1)CCO2	FC(F)(F)C(F)(F)C(F)(F)C(F)(F)C(F)(F)C(F)(F)C(F)(F)C(F)(F)CC(I)[Si]12OCCN(CCO1)CCO2	C16H15F17INO3Si	-1.9957	2198.35	11.2406	13.0196	181.964	-1268.13	3.40864	0	0	25.4787	-2.48438	0	1.53645	FALSE	0	0
39	Decafluoro(pentafluoroethyl)cyclohexanesulphonyl fluoride		CAS_RN: 68156-06-9	FC(F)(F)C(F)(F)C1(F)C(F)(F)C(F)(F)C(F)(F)C(F)(F)C1(F)S(=O)(=O)F	O=S(=O)(F)C1(F)C(F)(F)C(F)(F)C(F)(F)C(F)(F)C1(F)C(F)(F)C(F)(F)F	C8F16O2S	-0.7421	2501.55	13.8563	13.2894	224.319	-166.296	2.6909	0	0	-55.5954	0	0	1.12531	TRUE	1	0
40	2,2,3,3,4,4,5,5,6,6,7,7,8,8,8-Pentadecafluoro-N-hydroxyoctanimidamide		CAS_RN: 4314-38-9	ONC(=N)C(F)(F)C(F)(F)C(F)(F)C(F)(F)C(F)(F)C(F)(F)C(F)(F)F	N=C(NO)C(F)(F)C(F)(F)C(F)(F)C(F)(F)C(F)(F)C(F)(F)C(F)(F)F	C8H3F15N2O	3.945	1892.06	9.33326	12.6641	210.028	546.878	2.65126	7.7609	-3.3853	-86.1646	0	0	0.927157	TRUE	1	0
41	8,8,9,9,10,10,11,11,12,12,13,13,14,14,14-Pentadecafluorotetradec-6-ene		CAS_RN: 38787-60-9	CCCCCC=CC(F)(F)C(F)(F)C(F)(F)C(F)(F)C(F)(F)C(F)(F)C(F)(F)F	CCCCCC=CC(F)(F)C(F)(F)C(F)(F)C(F)(F)C(F)(F)C(F)(F)C(F)(F)F	C14H13F15	-1.2792	1768.94	9.33326	12.6243	180.781	3597.32	2.95878	0	0	-16.8264	-0.454584	0	1.78385	FALSE	0	0
42	perfluoroheptanesulfonamido amine carboxylic acid B, n=7		CAS_RN: 1432486-91-3	S(N(CCC(O)=O)CCCN(C)C)(=O)(=O)C(F)(F)C(F)(F)C(F)(F)C(F)(F)C(F)(F)C(F)(F)C(F)(F)F	CN(C)CCCN(CCC(=O)O)S(=O)(=O)C(F)(F)C(F)(F)C(F)(F)C(F)(F)C(F)(F)C(F)(F)C(F)(F)F	C15H17F15N2O4S	-2.5159	2163.6	9.33326	12.8998	181.931	2077.8	3.28648	8.5575	-1.95428	-28.4788	-1.61369	1	1.09152	TRUE	1	0
43	4,8-Dioxa-3H-perfluorononanoic acid	ADONA	CAS_RN: 919005-14-4	O=C(O)C(F)(F)C(F)OC(F)(F)C(F)(F)C(F)(F)OC(F)(F)F	O=C(O)C(F)(F)C(F)OC(F)(F)C(F)(F)C(F)(F)OC(F)(F)F	C7H2F12O4	-1.7829	1217.54	3.71151	12.0524	222.801	52.7901	2.5282	7.7	-3.51165	-18.6107	0	1	0.894867	TRUE	1	1
44	AI 3-18011		CAS_RN: 336-61-8	FC(F)(F)C(F)(F)C(F)(F)C(=O)NC1=CC=CC=C1	O=C(Nc1ccccc1)C(F)(F)C(F)(F)C(F)(F)F	C10H6F7NO	0.57	706.54	2.3811	11.7559	206.042	972.785	2.6024	0	-2.73516	22.3182	0	0	1.36457	FALSE	0	0
45	Heptafluorobutyl iodide		CAS_RN: 374-98-1	FC(F)(F)C(F)(F)C(F)(F)CI	FC(F)(F)C(F)(F)C(F)(F)CI	C4H2F7I	-1.8679	472.18	2.3811	11.2788	193.668	-601.746	1.58175	0	0	-11.3427	-1.31226	0	1.66034	FALSE	0	0
46	1,1'-(Oxybis((1-methylethylene)oxy))bis(3-(perfluoro-11-methyldodecyl)propan-2-ol)		CAS_RN: 93776-03-5	CC(COCC(O)CC(F)(F)C(F)(F)C(F)(F)C(F)(F)C(F)(F)C(F)(F)C(F)(F)C(F)(F)C(F)(F)C(F)(F)C(F)(C(F)(F)F)C(F)(F)F)OC(C)COCC(O)CC(F)(F)C(F)(F)C(F)(F)C(F)(F)C(F)(F)C(F)(F)C(F)(F)C(F)(F)C(F)(F)C(F)(F)C(F)(C(F)(F)F)C(F)(F)F	CC(COCC(O)CC(F)(F)C(F)(F)C(F)(F)C(F)(F)C(F)(F)C(F)(F)C(F)(F)C(F)(F)C(F)(F)C(F)(F)C(F)(C(F)(F)F)C(F)(F)F)OC(C)COCC(O)CC(F)(F)C(F)(F)C(F)(F)C(F)(F)C(F)(F)C(F)(F)C(F)(F)C(F)(F)C(F)(F)C(F)(F)C(F)(C(F)(F)F)C(F)(F)F	C38H24F54O5	-0.4615	8544.51	0	14.1132	200.946	4489.61	3.76613	9.5015	0	-117.793	-3.79134	0	2.56078	FALSE	0	0
47	1-Bromo-3-(3,3,4,4,5,5,6,6,7,7,8,8,9,9,10,10,10-heptadecafluorodecyl)benzene		CAS_RN: 340157-97-3	FC(F)(F)C(F)(F)C(F)(F)C(F)(F)C(F)(F)C(F)(F)C(F)(F)C(F)(F)CCc1cccc(Br)c1	FC(F)(F)C(F)(F)C(F)(F)C(F)(F)C(F)(F)C(F)(F)C(F)(F)C(F)(F)CCc1cccc(Br)c1	C16H8BrF17	0	2082.21	11.2406	12.8561	208.105	-196.771	3.21723	0	0	1.4121	-2.43652	0	1.2175	TRUE	1	0
48	2-((3,3,4,4,5,5,6,6,7,7,8,8,9,9,10,10,10-Heptadecafluorodecyl)amino)ethanol		CAS_RN: 27607-42-7	OCCNCCC(F)(F)C(F)(F)C(F)(F)C(F)(F)C(F)(F)C(F)(F)C(F)(F)C(F)(F)F	OCCNCCC(F)(F)C(F)(F)C(F)(F)C(F)(F)C(F)(F)C(F)(F)C(F)(F)C(F)(F)F	C12H10F17NO	0.1191	2089	11.2406	12.7871	188.302	2649.63	2.94661	8.2672	0	-66.2436	-2.56315	0	1.26556	TRUE	1	0
49	N'-(6,7-Dimethoxy-3,3-dimethyl-3,4-dihydroisoquinolin-1-yl)-2,2,3,3,4,4,4-heptafluorobutanehydrazide		CAS_RN: 304435-61-8	COc1cc2CC(C)(C)N=C(NNC(=O)C(F)(F)C(F)(F)C(F)(F)F)c2cc1OC	COc1cc2c(cc1OC)C(NNC(=O)C(F)(F)C(F)(F)C(F)(F)F)=NC(C)(C)C2	C17H18F7N3O3	-0.8442	910.35	2.02732	12.3936	175.985	533.403	2.97247	0	-2.87692	46.7736	0.351308	0	1.44012	FALSE	0	0
50	3-Methylbutyl heptadecafluorononanoate		CAS_RN: 117374-32-0	CC(C)CCOC(=O)C(F)(F)C(F)(F)C(F)(F)C(F)(F)C(F)(F)C(F)(F)C(F)(F)C(F)(F)F	CC(C)CCOC(=O)C(F)(F)C(F)(F)C(F)(F)C(F)(F)C(F)(F)C(F)(F)C(F)(F)C(F)(F)F	C14H11F17O2	-2.0163	2207.93	11.2406	12.8509	195.503	2922.43	3.0134	0	-3.73674	-39.2264	-1.23991	0	1.57103	FALSE	0	0
51	1,1,1,2,2,3,3,4,4-Nonafluorooctadecane		CAS_RN: 133310-68-6	CCCCCCCCCCCCCCC(F)(F)C(F)(F)C(F)(F)C(F)(F)F	CCCCCCCCCCCCCCC(F)(F)C(F)(F)C(F)(F)C(F)(F)F	C18H29F9	-1.4528	982.75	3.96541	11.9046	125.738	3248.6	3.04358	0	0	24.6053	-1.70526	0	2.09526	FALSE	0	0
52	8:2 Fluorotelomer phosphate diester	8:2diPAP	CAS_RN: 678-41-1	FC(F)(CCOP(=O)(OCCC(F)(F)C(F)(F)C(F)(F)C(F)(F)C(F)(F)C(F)(F)C(F)(F)C(F)(F)F)O)C(F)(F)C(F)(F)C(F)(F)C(F)(F)C(F)(F)C(F)(F)C(F)(F)F	O=P(O)(OCCC(F)(F)C(F)(F)C(F)(F)C(F)(F)C(F)(F)C(F)(F)C(F)(F)C(F)(F)F)OCCC(F)(F)C(F)(F)C(F)(F)C(F)(F)C(F)(F)C(F)(F)C(F)(F)C(F)(F)F	C20H9F34O4P	-1.0907	4245.53	18.737	13.5076	208.55	741.688	3.52665	9.1109	0	-126.562	-3.70324	1	1.15951	TRUE	1	1
53	Chromium pentacarbonyl[perfluoro-4-(isocyano-βC)butane]		CAS_RN: 106065-05-8	FC(F)(F)C(F)(F)C(F)(F)C(F)(F)[N]#[C-][Cr]([C-]#[O+])([C-]#[O+])([C-]#[O+])([C-]#[O+])[C-]#[O+]	FC(F)(F)C(F)(F)C(F)(F)C(F)(F)[N]#[C-][Cr]([C-]#[O+])([C-]#[O+])([C-]#[O+])([C-]#[O+])[C-]#[O+]	C10CrF9N1O5	10.0659	0	3.96541	12.6903	289.914	316.422	0	0	0	80.6308	0	0	2.77801	FALSE	0	0
54	2,2,3,3,4,4,4-Heptafluorobutyl heptafluorobutanoate		CAS_RN: 308-45-2	FC(F)(F)C(F)(F)C(F)(F)COC(=O)C(F)(F)C(F)(F)C(F)(F)F	O=C(OCC(F)(F)C(F)(F)C(F)(F)F)C(F)(F)C(F)(F)C(F)(F)F	C8H2F14O2	-2.5163	1201.44	4.72177	12.1863	203.105	131.723	2.5889	0	-4.08104	-40.097	-3.53981	0	1.51255	FALSE	0	0
55	Phosphonic acid, (tridecafluorohexyl)-		CAS_RN: 40143-76-8	FC(F)(C(F)(F)P(O)(=O)O)C(F)(F)C(F)(F)C(F)(F)C(F)(F)F	O=P(O)(O)C(F)(F)C(F)(F)C(F)(F)C(F)(F)C(F)(F)C(F)(F)F	C6H2F13O3P	3.195	1653.75	7.47342	12.5486	217.338	191.86	2.49206	7.8894	0	-64.4866	0	2	0.904311	TRUE	1	0
56	Cyclohexanesulfonic acid, decafluoro(pentafluoroethyl)-, potassium salt (TSCA, DSL, AICS)		CAS_RN: 67584-42-3	[K+].C1(C(C(C(C(C1(F)F)(F)F)(F)F)(F)F)(F)F)(S(=O)(=O)[O-])C(C(F)(F)F)(F)F	O=S(=O)(O)C1(C(F)(F)C(F)(F)F)C(F)(F)C(F)(F)C(F)(F)C(F)(F)C1(F)F	C8HF15O3S	1.7231	2877.99	13.8563	13.3244	200.927	59.582	2.70554	8.3666	0	-0.4841	0	1	0.731865	TRUE	1	0
57	Perfluoro-3-methoxypropanoic acid		CAS_RN: 377-73-1	OC(=O)C(F)(F)C(F)(F)OC(F)(F)F	O=C(O)C(F)(F)C(F)(F)OC(F)(F)F	C4HF7O3	-0.5937	706.83	1.65096	11.3103	194.256	25.5644	1.58175	7.4964	-3.42431	6.2094	0	1	1.26722	TRUE	1	0
58	3-(Perfluorohexadecyl)-2-hydroxypropyl dihydrogen phosphate		CAS_RN: 94200-44-9	C(C(F)(F)C(F)(F)C(F)(F)C(F)(F)C(F)(F)C(F)(F)C(F)(F)C(F)(F)C(F)(F)C(F)(F)C(F)(F)C(F)(F)C(F)(F)C(F)(F)C(F)(F)C(F)(F)F)C(O)CO[P](O)(O)=O	O=P(O)(O)OCC(O)CC(F)(F)C(F)(F)C(F)(F)C(F)(F)C(F)(F)C(F)(F)C(F)(F)C(F)(F)C(F)(F)C(F)(F)C(F)(F)C(F)(F)C(F)(F)C(F)(F)C(F)(F)C(F)(F)F	C19H8F33O5P	1.077	4587.36	27.4082	13.6155	220.395	883.159	3.57097	8.9321	0	-157.573	-3.7433	2	1.40211	FALSE	0	0
59	Isooctanesulfonamide, heptadecafluoro-N,N-bis(2-hydroxyethyl)-		CAS_RN: 93894-66-7	OCCN(CCO)[S](=O)(=O)C(F)(F)C(F)(F)C(F)(F)C(F)(F)C(F)(F)C(F)(C(F)(F)F)C(F)(F)F	O=S(=O)(N(CCO)CCO)C(F)(F)C(F)(F)C(F)(F)C(F)(F)C(F)(F)C(F)(C(F)(F)F)C(F)(F)F	C12H10F17NO4S	0.0119	2945.78	11.7549	13.0464	192.916	1613.43	3.21821	8.5145	0	-27.1624	-1.70953	0	0.977114	TRUE	1	0
60	1,1,1,2,2,3,3,4,4,5,5,6,6,7,7-Pentadecafluoro-9-iodopentacosane		CAS_RN: 2837-34-5	CCCCCCCCCCCCCCCCC(I)CC(F)(F)C(F)(F)C(F)(F)C(F)(F)C(F)(F)C(F)(F)C(F)(F)F	CCCCCCCCCCCCCCCCC(I)CC(F)(F)C(F)(F)C(F)(F)C(F)(F)C(F)(F)C(F)(F)C(F)(F)F	C25H36F15I	-0.9014	1921.5	9.33326	12.6949	150.55	2687.23	3.42773	0	0	21.5372	-2.12246	0	1.75829	FALSE	0	0
61	1-(Perfluoro-7-methyloctyl)-4,7,10-trioxatetradecan-2-ol		CAS_RN: 94158-62-0	C(OCCOCCOCCCC)C(O)CC(F)(F)C(F)(F)C(F)(F)C(F)(F)C(F)(F)C(F)(F)C(F)(C(F)(F)F)C(F)(F)F	CCCCOCCOCCOCC(O)CC(F)(F)C(F)(F)C(F)(F)C(F)(F)C(F)(F)C(F)(F)C(F)(C(F)(F)F)C(F)(F)F	C20H23F19O4	-2.3256	3130.1	13.7028	13.0247	168.039	3583.51	3.28349	9.3154	0	-4.4307	-3.08541	0	1.81356	FALSE	0	0
62	double bond-perfluoroalkyl (linear) carboxylic acids_5_n, n=3		NA	F/C(C(F)(C(F)(F)C(F)(F)C(F)(F)C(F)(F)C(O)=O)F)=C(C(F)(F)C(F)(F)C(F)(F)F)/F	O=C(O)C(F)(F)C(F)(F)C(F)(F)C(F)(F)C(F)(F)/C(F)=C(\F)C(F)(F)C(F)(F)C(F)(F)F	C11HF19O2	1.0545	2225.19	8.73236	12.8149	241.373	98.8356	2.90822	7.6504	-5.61987	-113.195	0	1	0.869684	TRUE	1	0
63	N,N'-bis(Perfluorobutanoyl)1,4-butanediamine		CAS_RN: 2967-59-1	FC(F)(F)C(F)(F)C(F)(F)C(=O)NCCCCNC(=O)C(F)(F)C(F)(F)C(F)(F)F	O=C(NCCCCNC(=O)C(F)(F)C(F)(F)C(F)(F)F)C(F)(F)C(F)(F)C(F)(F)F	C12H10F14N2O2	-0.8608	1369.92	3.25516	12.2798	166.637	2904.6	2.97257	0	-3.05073	-2.1536	-1.06217	0	1.67994	FALSE	0	0
64	Silane, trimethyl(tridecafluorohexyl)-		CAS_RN: 135841-49-5	C[Si](C)(C)C(F)(F)C(F)(F)C(F)(F)C(F)(F)C(F)(F)C(F)(F)F	C[Si](C)(C)C(F)(F)C(F)(F)C(F)(F)C(F)(F)C(F)(F)C(F)(F)F	C9H9F13Si	10.2353	1576.04	7.47342	12.5486	198.074	1246.2	2.4996	0	0	-2.959	0	0	2.19602	FALSE	0	0
65	1,1,1,2,2,3,3-Heptafluoro-3-methoxypropane--(E)-1,2-dichloroethene (1/1)		CAS_RN: 218462-19-2	ClC=CCl.COC(F)(F)C(F)(F)C(F)(F)F	COC(F)(F)C(F)(F)C(F)(F)F	C4H3F7O	-6.135	554.25	2.3811	11.2788	134.233	345.374	1.58175	0	0	-17.971	0	0	2.21807	FALSE	0	0
66	Perfluoroalkyl (linear) dicarboxylic acids, n=14		NA	FC(C(O)=O)(C(F)(F)C(F)(F)C(F)(F)C(F)(F)C(F)(F)C(F)(F)C(F)(F)C(F)(F)C(F)(F)C(F)(F)C(F)(F)C(F)(F)C(F)(F)C(O)=O)F	O=C(O)C(F)(F)C(F)(F)C(F)(F)C(F)(F)C(F)(F)C(F)(F)C(F)(F)C(F)(F)C(F)(F)C(F)(F)C(F)(F)C(F)(F)C(F)(F)C(F)(F)C(=O)O	C16H2F28O4	1.8226	4068.13	23.2671	13.4871	237.607	196.262	3.34125	7.6655	-4.77665	-195.4	0	2	1.20201	TRUE	1	0
67	1-Iodopentadecafluoroheptane		CAS_RN: 335-58-0	FC(F)(F)C(F)(F)C(F)(F)C(F)(F)C(F)(F)C(F)(F)C(F)(F)I	FC(F)(F)C(F)(F)C(F)(F)C(F)(F)C(F)(F)C(F)(F)C(F)(F)I	C7F15I	-0.8113	1600.37	9.33326	12.5486	253.555	-496.072	2.64083	0	0	-96.7016	0	0	1.22166	TRUE	1	0
68	n:1:2 fluorotelomer betaine-related, n=5		NA	C[N+](CC(O)=O)(C)CCC(F)C(F)(F)C(F)(F)C(F)(F)C(F)(F)C(F)(F)C(F)(F)C(F)(F)C(F)(F)C(F)(F)C(F)(F)C(F)(F)F	C[N+](C)(CCC(F)C(F)(F)C(F)(F)C(F)(F)C(F)(F)C(F)(F)C(F)(F)C(F)(F)C(F)(F)C(F)(F)C(F)(F)C(F)(F)F)CC(=O)O	C18H13F24NO2	-1.7204	3231.48	17.1586	13.2498	185.006	2216.97	3.30433	8.5477	-1.81565	-89.1169	-2.27394	1	1.09636	TRUE	1	0
69	Potassium N-[(heptadecafluorooctyl)sulphonyl]-N-propylglycinate		CAS_RN: 55910-10-6	[K+].CCCN(CC(=O)[O-])S(=O)(=O)C(F)(F)C(F)(F)C(F)(F)C(F)(F)C(F)(F)C(F)(F)C(F)(F)C(F)(F)F	CCCN(CC(=O)O)S(=O)(=O)C(F)(F)C(F)(F)C(F)(F)C(F)(F)C(F)(F)C(F)(F)C(F)(F)C(F)(F)F	C13H10F17NO4S	-1.025	2382.72	11.2406	13.013	207.212	1614.45	3.21747	8.4413	-2.41779	-57.6305	-2.18828	1	0.757318	TRUE	1	0
70	1,1,1,2,2,3,3,4,4,5,5,6,6,7,7,8,8,9,9,10,10,11,11,12,12-Pentacosafluorononacosane		CAS_RN: 677324-32-2	CCCCCCCCCCCCCCCCCC(F)(F)C(F)(F)C(F)(F)C(F)(F)C(F)(F)C(F)(F)C(F)(F)C(F)(F)C(F)(F)C(F)(F)C(F)(F)C(F)(F)F	CCCCCCCCCCCCCCCCCC(F)(F)C(F)(F)C(F)(F)C(F)(F)C(F)(F)C(F)(F)C(F)(F)C(F)(F)C(F)(F)C(F)(F)C(F)(F)C(F)(F)F	C29H35F25	-0.7171	3400	19.1782	13.2848	161.585	8437.85	3.4671	0	0	-17.8146	-2.63012	0	3.47847	FALSE	0	0
71	4,4,5,5,6,6,7,7,8,8,9,9,9-Tridecafluorononyl 2-methylprop-2-enoate		CAS_RN: 1228350-17-1	CC(=C)C(=O)OCCCC(F)(F)C(F)(F)C(F)(F)C(F)(F)C(F)(F)C(F)(F)F	C=C(C)C(=O)OCCCC(F)(F)C(F)(F)C(F)(F)C(F)(F)C(F)(F)C(F)(F)F	C13H11F13O2	-2.3485	1551.79	7.47342	12.4612	191.964	1706.48	2.8695	0	-1.21133	-12.3944	-2.40999	0	1.41688	FALSE	0	0
72	Ethyl 2-(pentadecafluoroheptyl)imidazo[1,2-a]pyridine-3-carboxylate		CAS_RN: 135339-05-8	CCOC(=O)c1c(nc2ccccn12)C(F)(F)C(F)(F)C(F)(F)C(F)(F)C(F)(F)C(F)(F)C(F)(F)F	CCOC(=O)c1c(C(F)(F)C(F)(F)C(F)(F)C(F)(F)C(F)(F)C(F)(F)C(F)(F)F)nc2ccccn12	C17H9F15N2O2	-1.9142	1963.9	9.33326	13.0263	238.945	2124.45	3.13696	0	-1.98085	-17.8907	-0.659442	0	1.35186	TRUE	1	0
73	Perfluoro-3,4-dimethylhexane		CAS_RN: 1735-48-4	FC(F)(F)C(F)(F)C(F)(C(F)(F)F)C(F)(C(F)(F)F)C(F)(F)C(F)(F)F	FC(F)(F)C(F)(F)C(F)(C(F)(F)F)C(F)(C(F)(F)F)C(F)(F)C(F)(F)F	C8F18	-1.0143	2198.25	12.9974	12.9036	210.04	-39.2902	2.74864	0	0	-14.3816	0	0	1.1574	TRUE	1	0
74	perfluoroalkanesulfonamido quaternary ammonium disulfonate B, n=5		NA	S(N(CC(O)CS(=O)(O)=O)CCC[N+](CC(O)CS(=O)(O)=O)(C)C)(=O)(=O)C(F)(F)C(F)(F)C(F)(F)C(F)(F)C(F)(F)F	C[N+](C)(CCCN(CC(O)CS(=O)(=O)O)S(=O)(=O)C(F)(F)C(F)(F)C(F)(F)C(F)(F)C(F)(F)F)CC(O)CS(=O)(=O)O	C16H25F11N2O10S3	-0.2132	1976.58	5.67624	12.7738	158.137	871.327	3.44195	9.7596	0	18.9668	-1.92508	2	1.22097	TRUE	1	0
75	1,2,4,5-Tetrafluoro-3-(1,1,1,2,3,3,3-heptafluoropropan-2-yl)-6-nitrobenzene		CAS_RN: 20017-50-9	[O-][N+](=O)c1c(F)c(F)c(c(F)c1F)C(F)(C(F)(F)F)C(F)(F)F	O=[N+]([O-])c1c(F)c(F)c(C(F)(C(F)(F)F)C(F)(F)F)c(F)c1F	C9F11NO2	0.7206	1448.42	2.3811	12.4089	239.147	-81.4271	2.6568	0	0	15.312	0	0	1.27335	TRUE	1	0
76	4-(Heptadecafluorooctyl)benzoic acid		CAS_RN: 74701-33-0	OC(=O)C1=CC=C(C=C1)C(F)(F)C(F)(F)C(F)(F)C(F)(F)C(F)(F)C(F)(F)C(F)(F)C(F)(F)F	O=C(O)c1ccc(C(F)(F)C(F)(F)C(F)(F)C(F)(F)C(F)(F)C(F)(F)C(F)(F)C(F)(F)F)cc1	C15H5F17O2	1.4461	2184.19	11.2406	12.9339	216.598	1145.78	3.05127	8.5125	-1.92504	-10.1203	0	1	0.588076	TRUE	1	0
77	[[4-[(Heptadecafluorononenyl)oxy]phenyl]methyl]phosphonic acid		CAS_RN: 63513-12-2	OP(O)(=O)CC1=CC=C(OC(F)=C(F)C(F)(F)C(F)(F)C(F)(F)C(F)(F)C(F)(F)C(F)(F)C(F)(F)F)C=C1	O=P(O)(O)Cc1ccc(OC(F)=C(F)C(F)(F)C(F)(F)C(F)(F)C(F)(F)C(F)(F)C(F)(F)C(F)(F)F)cc1	C16H8F17O4P	1.6013	2167.18	9.33326	12.8646	218.495	855.998	3.24215	8.8549	-4.51875	-12.2255	-0.871019	2	0.901207	TRUE	1	0
78	5-(Heptafluoropropyl)-3-phenyl-1H-1,2,4-triazole		CAS_RN: 2195-67-7	FC(F)(F)C(F)(F)C(F)(F)c1Nnc(n1)-c1ccccc1	FC(F)(F)C(F)(F)C(F)(F)c1nc(-c2ccccc2)n[nH]1	C11H6F7N3	0.6374	693.38	2.3811	12.0357	213.4	1011.49	2.61918	0	0	28.2464	0	0	1.3773	FALSE	0	0
79	Pentafluorosulfide Perfluoroalkyl (linear) carboxylic acids, n=7		NA	FC([S](F)(F)(F)(F)F)(C(F)(F)C(F)(F)C(F)(F)C(F)(F)C(F)(F)C(F)(F)C(O)=O)F	O=C(O)C(F)(F)C(F)(F)C(F)(F)C(F)(F)C(F)(F)C(F)(F)C(F)(F)S(F)(F)(F)(F)F	C8HF19O2S	-0.314	2408.66	9.33326	13.114	231.345	76.3311	2.75914	7.5692	-4.49939	-73.342	0	1	0.659555	TRUE	1	0
80	perfluoroalkanesulfonamido quaternary ammonium oxide, n=6		CAS_RN: 30295-56-8	S(NCCC[N+]([O-])(C)C)(=O)(=O)C(F)(F)C(F)(F)C(F)(F)C(F)(F)C(F)(F)C(F)(F)F	C[N+](C)([O-])CCCNS(=O)(=O)C(F)(F)C(F)(F)C(F)(F)C(F)(F)C(F)(F)C(F)(F)F	C11H13F13N2O3S	-2.6385	1760.72	7.47342	12.6562	175.489	1774.07	3.08887	0	0	-29.4342	-1.22721	0	1.46866	FALSE	0	0
81	1-bromo-1h,1h,2h,2h-perfluorooctane		CAS_RN: 161583-34-2	FC(F)(F)C(F)(F)C(F)(F)C(F)(F)C(F)(F)C(F)(F)CCBr	FC(F)(F)C(F)(F)C(F)(F)C(F)(F)C(F)(F)C(F)(F)CCBr	C8H4BrF13	-1.3072	1424.24	7.47342	12.3993	213.621	-1168.82	2.59927	0	0	-42.2824	-2.03175	0	1.32819	TRUE	1	0
82	1,1,1,2,2,3,3,12,12,13,13,14,14,14-Tetradecafluorotetradecane		CAS_RN: 1835251-91-6	FC(F)(F)C(F)(F)C(F)(F)CCCCCCCCC(F)(F)C(F)(F)C(F)(F)F	FC(F)(F)C(F)(F)C(F)(F)CCCCCCCCC(F)(F)C(F)(F)C(F)(F)F	C14H16F14	-1.4042	1153.25	3.25516	12.091	136.936	3063.04	2.9951	0	0	44.2089	-1.79624	0	1.99865	FALSE	0	0
83	10:2 Fluorotelomer sulfonic acid		NA	O=S(CCC(F)(C(F)(C(F)(C(F)(C(F)(C(F)(C(F)(C(F)(C(F)(F)C(F)(F)F)F)F)F)F)F)F)F)F)(O)=O	O=S(=O)(O)CCC(F)(F)C(F)(F)C(F)(F)C(F)(F)C(F)(F)C(F)(F)C(F)(F)C(F)(F)C(F)(F)C(F)(F)F	C12H5F21O3S	0.4847	2670.22	15.1596	13.0797	222.383	363.502	3.14266	8.2256	0	-81.3481	-3.33842	1	0.795701	TRUE	1	0
84	Heptaethylene glycol perfluoro-2-isopropyl-1,3-dimethylbut-1-enyl methyl ether		CAS_RN: 88987-13-7	COCCOCCOCCOCCOCCOCCOCCOC(=C(C(F)(C(F)(F)F)C(F)(F)F)C(F)(C(F)(F)F)C(F)(F)F)C(F)(F)F	COCCOCCOCCOCCOCCOCCOCCOC(=C(C(F)(C(F)(F)F)C(F)(F)F)C(F)(C(F)(F)F)C(F)(F)F)C(F)(F)F	C24H31F17O8	-5.5226	1955.13	8.1948	12.8529	165.074	2292.76	3.36992	0	-5.51937	135.696	-2.03547	0	2.2355	FALSE	0	0
85	multiple H-substituted, multiple ether-substituted perfluoroalkyl alcohols, n=6, m=5		NA	FC(F)(F)C(F)(F)C(F)(F)C(F)(F)C(F)(F)C(F)(F)C(F)(F)C(F)(F)C(F)(F)C(F)(F)C(F)(F)C(F)(F)CCOCCOCCOCCOCCO[H]	OCCOCCOCCOCCOCCC(F)(F)C(F)(F)C(F)(F)C(F)(F)C(F)(F)C(F)(F)C(F)(F)C(F)(F)C(F)(F)C(F)(F)C(F)(F)C(F)(F)F	C22H21F25O5	-2.4372	3372.5	19.1782	13.2813	177.105	3988.15	3.38709	8.4434	0	-94.9436	-2.96474	0	1.88587	FALSE	0	0
86	N,N-Dichloro-2,2,3,3,4,4,4-heptafluorobutanamide		CAS_RN: 86451-48-1	FC(F)(F)C(F)(F)C(F)(F)C(=O)N(Cl)Cl	O=C(N(Cl)Cl)C(F)(F)C(F)(F)C(F)(F)F	C4Cl2F7NO	-5.1521	625.68	2.3811	11.6237	277.388	-233.928	2.37053	0	-2.46124	-22.1729	0	0	1.83055	FALSE	0	0
87	Perfluoro-5-(pentafluoroethyl)oxolane		CAS_RN: NOCAS_870516	FC(F)(F)C(F)(F)C1(F)OC(F)(F)C(F)(F)C1(F)F	FC(F)(F)C(F)(F)C1(F)OC(F)(F)C(F)(F)C1(F)F	C6F12O	-1.5145	1177.13	7.94418	12.6354	217.37	-38.0804	2.25844	0	0	-41.5806	0	0	1.23059	TRUE	1	0
88	Perfluoro(4a-(cyclohexylmethyl)decahydronaphthalene)		CAS_RN: 125061-94-1	FC(F)(C1(F)C(F)(F)C(F)(F)C(F)(F)C(F)(F)C1(F)F)C1(F)C(F)(F)C(F)(F)C(F)(F)C2(F)C(F)(F)C(F)(F)C(F)(F)C(F)(F)C12F	FC1(F)C(F)(F)C(F)(F)C(F)(C(F)(F)C2(F)C(F)(F)C(F)(F)C(F)(F)C3(F)C(F)(F)C(F)(F)C(F)(F)C(F)(F)C32F)C(F)(F)C1(F)F	C17F30	0.8798	5329.69	42.4742	14.1705	246.812	-124.524	3.3526	0	0	-109.734	0	0	1.82844	FALSE	0	0
89	Triethoxy(henicosafluorodecyl)silane		CAS_RN: 254095-33-5	CCO[Si](OCC)(OCC)C(F)(F)C(F)(F)C(F)(F)C(F)(F)C(F)(F)C(F)(F)C(F)(F)C(F)(F)C(F)(F)C(F)(F)F	CCO[Si](OCC)(OCC)C(F)(F)C(F)(F)C(F)(F)C(F)(F)C(F)(F)C(F)(F)C(F)(F)C(F)(F)C(F)(F)C(F)(F)F	C16H15F21O3Si	-2.1205	2847.73	15.1596	13.226	209.283	2879.63	3.11283	0	0	-73.0542	-1.23109	0	1.55003	FALSE	0	0
90	1,1,1,2-Tetrafluoro-2-iodo-2-(trifluoromethoxy)ethane		CAS_RN: 139604-89-0	FC(F)(F)OC(F)(I)C(F)(F)F	FC(F)(F)OC(F)(I)C(F)(F)F	C3F7IO	-3.2641	276.6	1.65096	10.9865	177.044	-2585.4	1.58175	0	0	17.0039	0	0	2.17895	FALSE	0	0
91	Dichloro[fluoro(heptadecafluorooctyl)-lambda~3~-chloranyl](pentafluorophenyl)silane		CAS_RN: 753025-21-7	F[Cl](C(F)(F)C(F)(F)C(F)(F)C(F)(F)C(F)(F)C(F)(F)C(F)(F)C(F)(F)F)[Si](Cl)(Cl)C1=C(F)C(F)=C(F)C(F)=C1F	FCl([Si](Cl)(C1=C(C(F)=C(C(F)=C1F)F)F)Cl)C(F)(C(F)(C(F)(C(F)(C(F)(C(F)(C(F)(C(F)(F)F)F)F)F)F)F)F)F	C14Cl3F23Si	7.1426	2525.82	11.2406	13.1904	287.393	-874.692	3.33568	0	-3.04861	-77.0831	0	0	1.84747	FALSE	0	0
92	1H,1H,2H,2H-Perfluorooctyldimethylchlorosilane		CAS_RN: 102488-47-1	C[Si](C)(Cl)CCC(F)(F)C(F)(F)C(F)(F)C(F)(F)C(F)(F)C(F)(F)F	C[Si](C)(Cl)CCC(F)(F)C(F)(F)C(F)(F)C(F)(F)C(F)(F)C(F)(F)F	C10H10ClF13Si	10.1	1458.41	7.47342	12.468	197.988	-1297.8	2.71037	0	0	11.9738	-1.99955	0	2.24848	FALSE	0	0
93	Methyl 3,3,4,4,5,5,6,6,6-nonafluoro-2-oxohexanoate		CAS_RN: 74067-16-6	COC(=O)C(=O)C(F)(F)C(F)(F)C(F)(F)C(F)(F)F	COC(=O)C(=O)C(F)(F)C(F)(F)C(F)(F)C(F)(F)F	C7H3F9O3	-3.2413	1091.88	3.96541	12.039	216.63	338.488	2.43143	0	-3.52414	-23.4774	0	0	1.42203	FALSE	0	0
94	1-Methoxy-4-(nonafluorobutyl)benzene		CAS_RN: 153910-98-6	COc1ccc(cc1)C(F)(F)C(F)(F)C(F)(F)C(F)(F)F	COc1ccc(C(F)(F)C(F)(F)C(F)(F)C(F)(F)F)cc1	C11H7F9O	-1.3203	942.67	3.96541	12.1435	179.349	884.554	2.61918	0	0	27.3805	0	0	1.44794	FALSE	0	0
95	1,1,1,2,2,3,3-Heptafluoro-5-iododecane		CAS_RN: 755-49-7	CCCCCC(I)CC(F)(F)C(F)(F)C(F)(F)F	CCCCCC(I)CC(F)(F)C(F)(F)C(F)(F)F	C10H14F7I	-1.9538	598.18	2.3811	11.5179	157.755	-2233.89	2.62055	0	0	33.6422	-1.34679	0	1.92881	FALSE	0	0
96	2,2,3,3,4,4,5,5,6,6,7,7,7-Tridecafluoro-N-(3-methoxyphenyl)heptanamide		CAS_RN: 904565-42-0	COc1cccc(NC(=O)C(F)(F)C(F)(F)C(F)(F)C(F)(F)C(F)(F)C(F)(F)F)c1	COc1cccc(NC(=O)C(F)(F)C(F)(F)C(F)(F)C(F)(F)C(F)(F)C(F)(F)F)c1	C14H8F13NO2	-0.5693	1632.28	7.47342	12.6141	205.113	1144.8	2.95034	0	-3.39671	-9.8044	0	0	1.19999	TRUE	1	0
97	2-(Heptafluoropropyl)-1H-imidazole		CAS_RN: 81769-47-3	FC(F)(F)C(F)(F)C(F)(F)C1=NC=CN1	FC(F)(F)C(F)(F)C(F)(F)c1ncc[nH]1	C6H3F7N2	-0.7317	608.63	2.3811	11.711	189.379	637.535	1.96156	0	0	-10.8342	0	0	1.46878	FALSE	0	0
98	1,4-Bis(chloromethyl)-2-(heptafluoropropyl)benzene		CAS_RN: 139263-35-7	FC(F)(F)C(F)(F)C(F)(F)C1=C(CCl)C=CC(CCl)=C1	FC(F)(F)C(F)(F)C(F)(F)c1cc(CCl)ccc1CCl	C11H7Cl2F7	0	655.29	2.3811	12.0022	207.305	574.073	2.60299	0	0	53.9239	0.110321	0	1.42496	FALSE	0	0
99	N-Allyl-N-ethyl-perfluorooctanesulfonamide		CAS_RN: 24924-36-5	C(N([S](=O)(=O)C(F)(F)C(F)(F)C(F)(F)C(F)(F)C(F)(F)C(F)(F)C(F)(F)C(F)(F)F)CC=C)C	C=CCN(CC)S(=O)(=O)C(F)(F)C(F)(F)C(F)(F)C(F)(F)C(F)(F)C(F)(F)C(F)(F)C(F)(F)F	C13H10F17NO2S	-2.2429	2372.36	11.2406	12.9891	196.799	1777.48	3.08137	0	0	-61.9534	-1.33842	0	1.33174	TRUE	1	0
100	N-[(4-Bromophenyl)(perfluorobutyl)-λ4-sulfanylidene]acetamide		CAS_RN: 1178899-27-8	CC(=O)N=S(/C1=CC=C(Br)C=C1)C(F)(F)C(F)(F)C(F)(F)C(F)(F)F	CC(=O)N=S(c1ccc(Br)cc1)C(F)(F)C(F)(F)C(F)(F)C(F)(F)F	C12H7BrF9NOS	-0.1438	950.91	3.96541	12.2943	244.116	-1748.58	3.06733	0	-1.33305	30.9582	0	0	1.50332	FALSE	0	0
101	1,1,1,2,2,4,4,5,5,5-Decafluoro-3-pentanone		CAS_RN: 684-32-2	FC(F)(F)C(F)(F)C(=O)C(F)(F)C(F)(F)F	O=C(C(F)(F)C(F)(F)F)C(F)(F)C(F)(F)F	C5F10O	-1.6091	693.56	2.94168	11.7356	209.305	0.469605	1.58175	0	-4.55556	-22.5792	0	0	1.55183	FALSE	0	0
102	8:2 Fluorotelomer sulfonic acid	8:2FTS	CAS_RN: 39108-34-4	C([S](=O)(=O)O)CC(F)(F)C(F)(F)C(F)(F)C(F)(F)C(F)(F)C(F)(F)C(F)(F)C(F)(F)F	O=S(=O)(O)CCC(F)(F)C(F)(F)C(F)(F)C(F)(F)C(F)(F)C(F)(F)C(F)(F)C(F)(F)F	C10H5F17O3S	0.5421	2075.09	11.2406	12.8198	216.369	292.278	2.90187	8.2085	0	-55.658	-3.16513	1	0.746882	TRUE	1	1
103	n:2 fluorotelomer thio alkyl amido betaine-related, n=3		NA	FC(F)(F)C(F)(F)C(F)(F)C(F)(F)C(F)(F)C(F)(F)CCSCC(NCCC[N+](C)(C)CC(O)=O)=O	C[N+](C)(CCCNC(=O)CSCCC(F)(F)C(F)(F)C(F)(F)C(F)(F)C(F)(F)C(F)(F)F)CC(=O)O	C17H21F13N2O3S	-1.8439	1669.55	7.47342	12.5502	153.3	1472.63	3.26804	8.7381	-1.073	9.2204	-2.24127	1	1.22404	TRUE	1	0
104	4-Fluoro-N-(2-fluoro-3-{[4-(1,1,1,2,3,3,3-heptafluoropropan-2-yl)-2,6-dimethylphenyl]carbamoyl}phenyl)-N-methyl-2-nitrobenzamide		CAS_RN: 862134-28-9	CN(C(=O)c1ccc(F)cc1[N+]([O-])=O)c1cccc(C(=O)Nc2c(C)cc(cc2C)C(F)(C(F)(F)F)C(F)(F)F)c1F	Cc1cc(C(F)(C(F)(F)F)C(F)(F)F)cc(C)c1NC(=O)c1cccc(N(C)C(=O)c2ccc(F)cc2[N+](=O)[O-])c1F	C26H18F9N3O4	0.3972	1466.69	2.3811	12.7372	201.042	379.811	3.29178	0	-1.24994	94.6253	0	0	1.39132	FALSE	0	0
105	2,2,3,3,4,4,5,5,6,6,6-Undecafluorohexyl 2-methylprop-2-enoate		CAS_RN: 13173-36-9	CC(=C)C(=O)OCC(F)(F)C(F)(F)C(F)(F)C(F)(F)C(F)(F)F	C=C(C)C(=O)OCC(F)(F)C(F)(F)C(F)(F)C(F)(F)C(F)(F)F	C10H7F11O2	-2.8111	1231.23	5.67624	12.2254	209.518	570.894	2.64495	0	-1.77188	-16.8437	-2.86585	0	1.38989	FALSE	0	0
106	H-substituted, di-ether-substituted perfluoroalkyl (linear) sulfonic acids, C7		NA	FC(F)(C(S(=O)(O)=O)(F)F)OC(F)(C(F)(F)F)C(F)(F)OC(F)(F)C(F)([H])F	O=S(=O)(O)C(F)(F)C(F)(F)OC(F)(C(F)(F)F)C(F)(F)OC(F)(F)C(F)F	C7H2F14O5S	-1.501	1467.34	5.88527	12.4589	232.899	119.008	2.68779	7.9115	0	-36.2402	0	1	0.765714	TRUE	1	0
107	2,2,3,3,4,4,4-Heptafluoro-1-(morpholin-4-yl)butane-1-thione		CAS_RN: 1206684-15-2	FC(F)(F)C(F)(F)C(F)(F)C(=S)N1CCOCC1	FC(F)(F)C(F)(F)C(F)(F)C(=S)N1CCOCC1	C8H8F7NOS	-4.1674	582.94	2.3811	11.8152	176.029	1503.06	2.49753	0	-1.12211	9.0081	-0.0995101	0	1.72655	FALSE	0	0
108	double bond-, ether-substituted perfluoroalkyl (linear) carboyxlic acids, n=1		NA	FC(F)(F)/C(F)=C(F)/C(F)(F)OC(F)(F)C(O)=O	O=C(O)C(F)(F)OC(F)(F)/C(F)=C(\F)C(F)(F)F	C6HF9O3	0.0459	762.32	0.965489	11.5081	227.042	28.0504	2.04264	7.622	-4.01973	-22.8718	0	1	1.08371	TRUE	1	0
109	1,1,1,2-Tetrafluoro-6-iodo-2-(trifluoromethyl)hexane		CAS_RN: 99324-97-7	FC(F)(F)C(F)(CCCCI)C(F)(F)F	FC(F)(F)C(F)(CCCCI)C(F)(F)F	C7H8F7I	-2.1727	802.71	2.3811	11.4289	156.857	-584.793	2.15128	0	0	55.8148	-1.52266	0	1.78202	FALSE	0	0
110	Perfluoro(1,3-dipropoxycyclohexane)		CAS_RN: 400626-83-7	FC(F)(F)C(F)(F)C(F)(F)OC1(F)C(F)(F)C(F)(F)C(F)(F)C(F)(OC(F)(F)C(F)(F)C(F)(F)F)C1(F)F	FC(F)(F)C(F)(F)C(F)(F)OC1(F)C(F)(F)C(F)(F)C(F)(F)C(F)(OC(F)(F)C(F)(F)C(F)(F)F)C1(F)F	C12F24O2	-1.5145	2804.63	19.6281	13.3553	255.929	-0.302411	3.14005	0	0	-83.1613	0	0	1.26485	TRUE	1	0
111	Trichloro(1,1,2,2,3,3,6,6,6-nonafluorohexyl)silane		CAS_RN: 78560-47-1	FC(F)(F)CCC(F)(F)C(F)(F)C(F)(F)[Si](Cl)(Cl)Cl	FC(F)(F)CCC(F)(F)C(F)(F)C(F)(F)[Si](Cl)(Cl)Cl	C6H4Cl3F9Si	14.7329	549.32	2.7016	11.9286	239.85	1027.79	2.95146	0	0	-18.7219	-2.30113	0	2.98453	FALSE	0	0
112	1,1,1,2-Tetrafluoro-4-methyl-2-(trifluoromethyl)pentan-3-one		CAS_RN: 62656-72-8	CC(C)C(=O)C(F)(C(F)(F)F)C(F)(F)F	CC(C)C(=O)C(F)(C(F)(F)F)C(F)(F)F	C7H7F7O	-2.5762	1087	2.3811	11.7024	154.249	972.79	2.15539	0	-2.53935	53.8035	0	0	1.72367	FALSE	0	0
113	Perfluoro(2,5,8,11,14-pentamethyl-3,6,9,12,15-pentaoxaoctadecanoic) acid		CAS_RN: 52481-85-3	OC(=O)C(F)(OC(F)(F)C(F)(OC(F)(F)C(F)(OC(F)(F)C(F)(OC(F)(F)C(F)(OC(F)(F)C(F)(F)C(F)(F)F)C(F)(F)F)C(F)(F)F)C(F)(F)F)C(F)(F)F)C(F)(F)F	O=C(O)C(F)(OC(F)(F)C(F)(OC(F)(F)C(F)(OC(F)(F)C(F)(OC(F)(F)C(F)(OC(F)(F)C(F)(F)C(F)(F)F)C(F)(F)F)C(F)(F)F)C(F)(F)F)C(F)(F)F)C(F)(F)F	C18HF35O7	-1.9538	3926.63	25.6364	13.4754	244.537	73.1128	3.61973	7.9768	-4.79323	-29.2408	0	1	1.17851	TRUE	1	0
114	3,5,6-Trichloroperfluorohexanoic acid		CAS_RN: 2106-54-9	OC(=O)C(F)(F)C(F)(Cl)C(F)(F)C(F)(Cl)C(F)(F)Cl	O=C(O)C(F)(F)C(F)(Cl)C(F)(F)C(F)(Cl)C(F)(F)Cl	C6HCl3F8O2	2.5819	871.23	5.67624	12.2042	263.881	227.352	2.63966	8.0252	-3.25406	-55.2093	0	1	0.919301	TRUE	1	0
115	Flupoxam		CAS_RN: 119126-15-7	NC(=O)c1nc(-c2ccccc2)n(n1)-c1ccc(Cl)c(COCC(F)(F)C(F)(F)F)c1	NC(=O)c1nc(-c2ccccc2)n(-c2ccc(Cl)c(COCC(F)(F)C(F)(F)F)c2)n1	C19H14ClF5N4O2	0.6418	418.13	1	12.1828	229.875	161.089	3.16099	0	-0.838235	44.7749	-1.78283	0	1.36917	FALSE	0	0
116	1,1-Octanediol, 2,2,3,3,4,4,5,5,6,6,7,7,8,8,8-pentadecafluoro-		CAS_RN: 31185-69-0	OC(O)C(F)(F)C(F)(F)C(F)(F)C(F)(F)C(F)(F)C(F)(F)C(F)(F)F	OC(O)C(F)(F)C(F)(F)C(F)(F)C(F)(F)C(F)(F)C(F)(F)C(F)(F)F	C8H3F15O2	2.6484	1865.44	9.33326	12.6412	210.636	582.983	2.58605	7.7684	0	-77.4065	0	0	0.825352	TRUE	1	0
117	N,N,N-Trimethyloctan-1-aminium pentadecafluorooctanoate		CAS_RN: 927835-01-6	CCCCCCCC[N+](C)(C)C.[O-]C(=O)C(F)(F)C(F)(F)C(F)(F)C(F)(F)C(F)(F)C(F)(F)C(F)(F)F	CCCCCCCC[N+](C)(C)C	C11H26N	-7.1207	153	0	9.7083	98.1601	-705.048	2.33355	0	0	19.0176	1.32552	0	2.87674	FALSE	0	0
118	p-[[4,4,5,5,5-pentafluoro-3-(pentafluoroethyl)-1,2,3-tris(trifluoromethyl)pent-1-enyl]oxy]-N-[3-(triethoxysilyl)propyl]benzenesulphonamide		CAS_RN: 52026-59-2	O=S(=O)(NCCC[Si](OCC)(OCC)OCC)C1=CC=C(OC(=C(C(F)(F)F)C(C(F)(F)F)(C(F)(F)C(F)(F)F)C(F)(F)C(F)(F)F)C(F)(F)F)C=C1	CCO[Si](CCCNS(=O)(=O)c1ccc(OC(=C(C(F)(F)F)C(C(F)(F)F)(C(F)(F)C(F)(F)F)C(F)(F)C(F)(F)F)C(F)(F)F)cc1)(OCC)OCC	C25H26F19NO6SSi	-1.0607	2210.61	11.2293	13.2664	196.391	1103.27	3.56818	0	-5.86452	229.805	-0.36897	0	2.02356	FALSE	0	0
119	multiple H-substituted, multiple ether-substituted perfluoroalkyl alcohols, n=6, m=14		NA	FC(F)(F)C(F)(F)C(F)(F)C(F)(F)C(F)(F)C(F)(F)C(F)(F)C(F)(F)C(F)(F)C(F)(F)C(F)(F)C(F)(F)CCOCCOCCOCCOCCOCCOCCOCCOCCOCCOCCOCCOCCOCCO[H]	OCCOCCOCCOCCOCCOCCOCCOCCOCCOCCOCCOCCOCCOCCC(F)(F)C(F)(F)C(F)(F)C(F)(F)C(F)(F)C(F)(F)C(F)(F)C(F)(F)C(F)(F)C(F)(F)C(F)(F)C(F)(F)F	C40H57F25O14	-4.8586	3631.25	19.1782	13.3274	143.572	5879.52	3.48557	8.573	0	-77.58	-2.98002	0	2.74394	FALSE	0	0
120	Potassium 3,3,4,4,5,5,6,6,7,7,8,8,9,9,10,10,11,11,12,12,12-henicosafluorododecyl sulfate		CAS_RN: 1262446-14-9	[K+].[O-]S(=O)(=O)OCCC(F)(F)C(F)(F)C(F)(F)C(F)(F)C(F)(F)C(F)(F)C(F)(F)C(F)(F)C(F)(F)C(F)(F)F	O=S(=O)(O)OCCC(F)(F)C(F)(F)C(F)(F)C(F)(F)C(F)(F)C(F)(F)C(F)(F)C(F)(F)C(F)(F)C(F)(F)F	C12H5F21O4S	-0.8692	2729.05	15.1596	13.0777	215.558	362.419	3.17095	8.1111	0	-95.9103	-3.26905	1	0.830278	TRUE	1	0
121	4-[(3,3,4,4,5,5,6,6,6-Nonafluorohexyl)sulfanyl]phenol		CAS_RN: 892155-14-5	OC1=CC=C(SCCC(F)(F)C(F)(F)C(F)(F)C(F)(F)F)C=C1	Oc1ccc(SCCC(F)(F)C(F)(F)C(F)(F)C(F)(F)F)cc1	C12H9F9OS	2.3525	890.72	3.96541	12.0035	179.799	162.587	2.62209	8.9984	0	41.4603	-1.75997	0	1.22786	TRUE	1	0
122	Phenyltris((perfluorohexyl)ethyl)stannane		CAS_RN: 175354-30-0	FC(F)(F)C(F)(F)C(F)(F)C(F)(F)C(F)(F)C(F)(F)CC[Sn](CCC(F)(F)C(F)(F)C(F)(F)C(F)(F)C(F)(F)C(F)(F)F)(CCC(F)(F)C(F)(F)C(F)(F)C(F)(F)C(F)(F)C(F)(F)F)C1=CC=CC=C1	FC(F)(F)C(F)(F)C(F)(F)C(F)(F)C(F)(F)C(F)(F)CC[Sn](CCC(F)(F)C(F)(F)C(F)(F)C(F)(F)C(F)(F)C(F)(F)F)(CCC(F)(F)C(F)(F)C(F)(F)C(F)(F)C(F)(F)C(F)(F)F)c1ccccc1	C30H17F39Sn	4.5496	4396.68	23.3592	13.6402	202.419	-7992.28	3.66484	0	0	88.7378	-3.98635	0	3.73019	FALSE	0	0
123	Perfluoroeicosyl iodide		CAS_RN: 29809-34-5	FC(C(C(C(C(C(C(C(C(C(C(C(C(C(C(C(C(C(C(C(F)(F)F)(F)F)(F)F)(F)F)(F)F)(F)F)(F)F)(F)F)(F)F)(F)F)(F)F)(F)F)(F)F)(F)F)(F)F)(F)F)(F)F)(F)F)(F)F)(I)F	FC(F)(F)C(F)(F)C(F)(F)C(F)(F)C(F)(F)C(F)(F)C(F)(F)C(F)(F)C(F)(F)C(F)(F)C(F)(F)C(F)(F)C(F)(F)C(F)(F)C(F)(F)C(F)(F)C(F)(F)C(F)(F)C(F)(F)C(F)(F)I	C20F41I	-0.3495	5468.68	35.8027	13.8098	248.882	-100.188	3.66149	0	0	-263.562	0	0	1.86881	FALSE	0	0
124	Diammonium 4,4,5,5,6,6,7,7,8,8,9,9,10,10,11,11,11-heptadecafluoro-2-hydroxyundecyl phosphate		CAS_RN: 94200-45-0	[NH4+].[NH4+].OC(COP(=O)([O-])[O-])CC(F)(F)C(F)(F)C(F)(F)C(F)(F)C(F)(F)C(F)(F)C(F)(F)C(F)(F)F	O=P(O)(O)OCC(O)CC(F)(F)C(F)(F)C(F)(F)C(F)(F)C(F)(F)C(F)(F)C(F)(F)C(F)(F)F	C11H8F17O5P	1.3729	2206.86	11.2406	12.8484	199.677	533.055	3.09799	8.8787	0	-53.3868	-3.26562	2	0.974076	TRUE	1	0
125	5,5,6,6,7,7,8,8,8-Nonafluorooctanoic acid		CAS_RN: 27854-33-7	OC(=O)CCCC(F)(F)C(F)(F)C(F)(F)C(F)(F)F	O=C(O)CCCC(F)(F)C(F)(F)C(F)(F)C(F)(F)F	C8H7F9O2	-0.0879	897.54	3.96541	11.8634	166.362	1115.88	2.42214	8.0417	-1.67898	0.1123	-2.11313	1	1.1038	TRUE	1	0
126	1,1,1,2,2,3,3,4-Octafluoro-7,7-dimethyloct-4-ene		CAS_RN: 90292-33-4	CC(C)(C)CC=C(F)C(F)(F)C(F)(F)C(F)(F)F	CC(C)(C)CC=C(F)C(F)(F)C(F)(F)C(F)(F)F	C10H12F8	-2.1747	748.69	2.40685	11.6891	166.415	667.57	2.33355	0	-2.77801	27.1022	-0.400436	0	1.57797	FALSE	0	0
127	1,1,1,3,3-Pentafluoro-3-methoxy-2-(trifluoromethyl)propane		CAS_RN: 382-26-3	COC(F)(F)C(C(F)(F)F)C(F)(F)F	COC(F)(F)C(C(F)(F)F)C(F)(F)F	C5H4F8O	-5.1749	1571	1.5	11.4527	161.642	-687.599	1.58175	0	0	39.6241	0	0	2.02952	FALSE	0	0
128	3-Ethenyl-1,1,2-trifluoro-2-(1,1,2,2-tetrafluoro-2-{1,1,2,2-tetrafluoro-2-[1,1,2,2-tetrafluoro-2-(trifluoromethoxy)ethoxy]ethoxy}ethoxy)cyclobutane		CAS_RN: 709620-35-9	FC(F)(F)OC(F)(F)C(F)(F)OC(F)(F)C(F)(F)OC(F)(F)C(F)(F)OC1(F)C(CC1(F)F)C=C	C=CC1CC(F)(F)C1(F)OC(F)(F)C(F)(F)OC(F)(F)C(F)(F)OC(F)(F)C(F)(F)OC(F)(F)F	C13H6F18O4	-3.4138	1501.06	8.91787	12.7827	206.243	1082.64	3.11063	0	0	27.0118	-1.70747	0	1.45814	FALSE	0	0
129	n:2 fluorotelomer thioamido sulfonic acids, n=3		CAS_RN: 1513864-10-2	FC(F)(F)C(F)(F)C(F)(F)C(F)(F)C(F)(F)C(F)(F)CCS(CCC(NC(C)(C)CS(O)(=O)=O)=O)=O	CC(C)(CS(=O)(=O)O)NC(=O)CCS(=O)CCC(F)(F)C(F)(F)C(F)(F)C(F)(F)C(F)(F)C(F)(F)F	C15H18F13NO5S2	0.843	1740.49	6.54649	12.6224	169.438	23.5643	3.29111	8.8883	-1.04298	5.4905	-2.56726	1	0.949811	TRUE	1	0
130	Perfluorohexadecane		CAS_RN: 355-49-7	FC(F)(F)C(F)(F)C(F)(F)C(F)(F)C(F)(F)C(F)(F)C(F)(F)C(F)(F)C(F)(F)C(F)(F)C(F)(F)C(F)(F)C(F)(F)C(F)(F)C(F)(F)C(F)(F)F	FC(F)(F)C(F)(F)C(F)(F)C(F)(F)C(F)(F)C(F)(F)C(F)(F)C(F)(F)C(F)(F)C(F)(F)C(F)(F)C(F)(F)C(F)(F)C(F)(F)C(F)(F)C(F)(F)F	C16F34	-0.4993	4398.75	27.4082	13.5606	241.577	-2.73413	3.38344	0	0	-188.727	0	0	1.45475	FALSE	0	0
131	Pentadecafluorooctyl chloride		CAS_RN: 335-64-8	FC(F)(F)C(F)(F)C(F)(F)C(F)(F)C(F)(F)C(F)(F)C(F)(F)C(Cl)=O	O=C(Cl)C(F)(F)C(F)(F)C(F)(F)C(F)(F)C(F)(F)C(F)(F)C(F)(F)F	C8ClF15O	-0.8529	1755.4	9.33326	12.6412	245.675	-23.6205	2.66974	0	-3.11524	-85.5072	0	0	1.11626	TRUE	1	0
132	2-(N-Butylperfluorooctanesulfonamido)ethyl acrylate		CAS_RN: 383-07-3	CCCCN(CCOC(=O)C=C)[S](=O)(=O)C(F)(F)C(F)(F)C(F)(F)C(F)(F)C(F)(F)C(F)(F)C(F)(F)C(F)(F)F	C=CC(=O)OCCN(CCCC)S(=O)(=O)C(F)(F)C(F)(F)C(F)(F)C(F)(F)C(F)(F)C(F)(F)C(F)(F)C(F)(F)F	C17H16F17NO4S	-2.5845	2440.67	11.2406	13.0238	189.979	3239.54	3.35249	0	-1.37713	-41.6027	-1.5437	0	1.68094	FALSE	0	0
133	Diethyl (3,3,4,4,5,5,6,6,6-nonafluorohexyl)phosphonate		CAS_RN: 627909-24-4	CCOP(=O)(CCC(F)(F)C(F)(F)C(F)(F)C(F)(F)F)OCC	CCOP(=O)(CCC(F)(F)C(F)(F)C(F)(F)C(F)(F)F)OCC	C10H14F9O3P	-3.6221	972.25	3.96541	12.0437	160.01	631.359	2.90079	0	0	4.9856	-2.19221	0	1.67189	FALSE	0	0
134	1,1,1,2,2,3,3,4,5,5,5-Undecafluoro-4-iodopentane		CAS_RN: 68158-13-4	FC(F)(F)C(F)(F)C(F)(F)C(F)(I)C(F)(F)F	FC(F)(F)C(F)(F)C(F)(F)C(F)(I)C(F)(F)F	C5F11I	-1.0022	1005.24	5.67624	12.0588	251.904	-2232.21	2.19463	0	0	-27.1551	0	0	1.65547	FALSE	0	0
135	N-Butyl-N-(2-hydroxyethyl)perfluoro-1-octanesulfonamide		CAS_RN: 2263-09-4	C(N([S](=O)(=O)C(F)(F)C(F)(F)C(F)(F)C(F)(F)C(F)(F)C(F)(F)C(F)(F)C(F)(F)F)CCCC)CO	CCCCN(CCO)S(=O)(=O)C(F)(F)C(F)(F)C(F)(F)C(F)(F)C(F)(F)C(F)(F)C(F)(F)C(F)(F)F	C14H14F17NO3S	-1.1465	2384.07	11.2406	13.003	189.835	3260.49	3.18211	8.6668	0	-47.3171	-1.52939	0	1.43404	FALSE	0	0
136	2-Chloro-4-(1,1,1,2,3,3,3-heptafluoropropan-2-yl)pyridine		CAS_RN: 1816286-71-1	FC(F)(F)C(F)(c1ccnc(Cl)c1)C(F)(F)F	FC(F)(F)C(F)(c1ccnc(Cl)c1)C(F)(F)F	C8H3ClF7N	-1.2333	844.89	2.3811	11.8777	191.666	4.2898	2.22345	0	0	58.5431	0	0	1.52072	FALSE	0	0
137	Fluorocarbon FC 70		CAS_RN: 338-84-1	FC(C(C(C(C(N(C(F)(F)C(F)(F)C(F)(F)C(F)(F)C(F)(F)F)C(C(C(C(C(F)(F)F)(F)F)(F)F)(F)F)(F)F)(F)F)(F)F)(F)F)(F)F)(F)F	FC(F)(F)C(F)(F)C(F)(F)C(F)(F)C(F)(F)N(C(F)(F)C(F)(F)C(F)(F)C(F)(F)C(F)(F)F)C(F)(F)C(F)(F)C(F)(F)C(F)(F)C(F)(F)F	C15F33N	-1.5587	4088.25	26.0204	13.5041	244.572	1.24634	3.47274	0	0	-124.599	0	0	1.40274	FALSE	0	0
138	Butanamide, N,N'-(1,1'-biphenyl)-4,4'-diylbis(2,2,3,3,4,4,4-heptafluoro-		CAS_RN: 75042-07-8	FC(F)(F)C(F)(F)C(F)(F)C(=O)NC1=CC=C(C=C1)C1=CC=C(NC(=O)C(F)(F)C(F)(F)C(F)(F)F)C=C1	O=C(Nc1ccc(-c2ccc(NC(=O)C(F)(F)C(F)(F)C(F)(F)F)cc2)cc1)C(F)(F)C(F)(F)C(F)(F)F	C20H10F14N2O2	1.3959	1464.31	2.69821	12.5813	206.524	1452.69	3.33115	0	-2.97169	68.7187	0	0	1.41375	FALSE	0	0
139	2-{[4-(Perfluorobutoxy)pyridin-2-yl]methanesulfinyl}-1H-thieno[3,4-d]imidazole		CAS_RN: NOCAS_869668	FC(F)(F)C(F)(F)C(F)(F)COC1=CC=NC(CS(=O)C2=NC3=CSC=C3N2)=C1	O=S(Cc1cc(OCC(F)(F)C(F)(F)C(F)(F)F)ccn1)c1nc2cscc2[nH]1	C15H10F7N3O2S2	0.8638	723.51	2.3811	12.1923	206.735	-45.4054	3.25279	0	0	31.047	-2.18369	0	1.3796	FALSE	0	0
140	Diammonium 3,3,4,4,5,5,6,6,7,7,8,8,9,9,10,10,11,11,12,12,13,14,14,14-tetracosafluoro-13-(trifluoromethyl)tetradecyl phosphate		CAS_RN: 93857-51-3	[NH4+].[NH4+].[O-]P(=O)([O-])OCCC(F)(F)C(F)(F)C(F)(F)C(F)(F)C(F)(F)C(F)(F)C(F)(F)C(F)(F)C(F)(F)C(F)(F)C(F)(C(F)(F)F)C(F)(F)F	O=P(O)(O)OCCC(F)(F)C(F)(F)C(F)(F)C(F)(F)C(F)(F)C(F)(F)C(F)(F)C(F)(F)C(F)(F)C(F)(F)C(F)(C(F)(F)F)C(F)(F)F	C15H6F27O4P	0.335	4196.7	21.7082	13.4068	218.662	261.791	3.34658	8.2406	0	-96.1436	-3.41589	2	1.13135	TRUE	1	0
141	ether-substituted perfluoroalkyl (linear) caborxylic acids_ii, n=10		NA	FC(F)(F)OC(F)(F)C(F)(F)C(F)(F)C(F)(F)C(F)(F)C(F)(F)C(F)(F)C(F)(F)C(F)(F)C(F)(F)C(O)=O	O=C(O)C(F)(F)C(F)(F)C(F)(F)C(F)(F)C(F)(F)C(F)(F)C(F)(F)C(F)(F)C(F)(F)C(F)(F)OC(F)(F)F	C12HF23O3	0.0426	3103.56	16.4266	13.1469	235.934	50.4152	3.14748	7.6416	-4.6144	-110.051	0	1	0.725371	TRUE	1	0
142	1,1,1,2,2,3,3,4,4,5,5,6,6,7,7,8,8,9,9,10,10-Henicosafluoro-12-iodoheptadecane		CAS_RN: 129838-39-7	CCCCCC(I)CC(F)(F)C(F)(F)C(F)(F)C(F)(F)C(F)(F)C(F)(F)C(F)(F)C(F)(F)C(F)(F)C(F)(F)F	CCCCCC(I)CC(F)(F)C(F)(F)C(F)(F)C(F)(F)C(F)(F)C(F)(F)C(F)(F)C(F)(F)C(F)(F)C(F)(F)F	C17H14F21I	-0.8428	2679.43	15.1596	13.0798	201.707	-1635.82	3.37975	0	0	-30.6336	-2.41607	0	1.42675	FALSE	0	0
143	N-ethyl perfluorooctanesulfonamido polyethylene glycol, n=8, m=12		NA	OCCOCCOCCOCCOCCOCCOCCOCCOCCOCCOCCOCCOCCN(CC)S(=O)(=O)C(F)(F)C(F)(F)C(F)(F)C(F)(F)C(F)(F)C(F)(F)C(F)(F)C(F)(F)F	CCN(CCOCCOCCOCCOCCOCCOCCOCCOCCOCCOCCOCCOCCO)S(=O)(=O)C(F)(F)C(F)(F)C(F)(F)C(F)(F)C(F)(F)C(F)(F)C(F)(F)C(F)(F)F	C36H58F17NO15S	-5.355	2709.47	11.2406	13.0736	136.445	4893.36	3.46082	8.5746	0	-42.3565	-1.39748	0	2.43553	FALSE	0	0
144	multiple H-substituted, multiple ether-substituted perfluoroalkyl alcohols, n=3, m=8		NA	FC(F)(F)C(F)(F)C(F)(F)C(F)(F)C(F)(F)C(F)(F)CCOCCOCCOCCOCCOCCOCCOCCO[H]	OCCOCCOCCOCCOCCOCCOCCOCCC(F)(F)C(F)(F)C(F)(F)C(F)(F)C(F)(F)C(F)(F)F	C22H33F13O8	-5.006	1673.38	7.47342	12.4932	134.567	2782.73	3.33276	8.5096	0	-19.8941	-2.42387	0	1.95497	FALSE	0	0
145	1,4-Dibromo-1,1,2,2-tetrafluorobutane		CAS_RN: 18599-20-7	FC(F)(Br)C(F)(F)CCBr	FC(F)(Br)C(F)(F)CCBr	C4H4Br2F4	-2.3407	112.59	1	10.5768	222.407	-1064.16	1.58175	0	0	-16.9086	-0.591114	0	1.87678	FALSE	0	0
146	multiple H-substituted, multiple ether-substituted perfluoroalkyl alcohols, n=5, m=14		NA	FC(F)(F)C(F)(F)C(F)(F)C(F)(F)C(F)(F)C(F)(F)C(F)(F)C(F)(F)C(F)(F)C(F)(F)CCOCCOCCOCCOCCOCCOCCOCCOCCOCCOCCOCCOCCOCCO[H]	OCCOCCOCCOCCOCCOCCOCCOCCOCCOCCOCCOCCOCCOCCC(F)(F)C(F)(F)C(F)(F)C(F)(F)C(F)(F)C(F)(F)C(F)(F)C(F)(F)C(F)(F)C(F)(F)F	C38H57F21O14	-5.2041	3036.13	15.1596	13.1306	137.923	4998.84	3.46659	8.5723	0	-57.7451	-2.85197	0	2.50076	FALSE	0	0
147	1,1,2,2,3,3,4,4,4-nonafluoro-N-(2-hydroxyethyl)-1-Butanesulfonamide		CAS_RN: 34454-99-4	FC(F)(F)C(F)(F)C(F)(F)C(F)(F)S(=O)(NCCO)=O	O=S(=O)(NCCO)C(F)(F)C(F)(F)C(F)(F)C(F)(F)F	C6H6F9NO3S	0.9934	1091.81	3.96541	12.1584	189.861	1264.28	2.40589	8.1235	0	-25.1023	-1.22027	0	1.03926	TRUE	1	0
148	Bis[3,3,4,4,5,5,6,6,7,7,8,8,9,9,10,10,11,11,12,12,13,13,14,14,15,15,16,16,17,17,18,18,18-tritriacontafluorooctadecyl] hydrogen phosphate, compound with 2,2'-iminodiethanol (1:1)		CAS_RN: 94291-76-6	OCCNCCO.OP(=O)(OCCC(F)(F)C(F)(F)C(F)(F)C(F)(F)C(F)(F)C(F)(F)C(F)(F)C(F)(F)C(F)(F)C(F)(F)C(F)(F)C(F)(F)C(F)(F)C(F)(F)C(F)(F)C(F)(F)F)OCCC(F)(F)C(F)(F)C(F)(F)C(F)(F)C(F)(F)C(F)(F)C(F)(F)C(F)(F)C(F)(F)C(F)(F)C(F)(F)C(F)(F)C(F)(F)C(F)(F)C(F)(F)C(F)(F)F	O=P(O)(OCCC(F)(F)C(F)(F)C(F)(F)C(F)(F)C(F)(F)C(F)(F)C(F)(F)C(F)(F)C(F)(F)C(F)(F)C(F)(F)C(F)(F)C(F)(F)C(F)(F)C(F)(F)C(F)(F)F)OCCC(F)(F)C(F)(F)C(F)(F)C(F)(F)C(F)(F)C(F)(F)C(F)(F)C(F)(F)C(F)(F)C(F)(F)C(F)(F)C(F)(F)C(F)(F)C(F)(F)C(F)(F)C(F)(F)F	C36H9F66O4P	-0.5688	9006.53	0	14.293	226.853	1011.36	3.83183	9.1887	0	-334.059	-4.41843	1	2.37716	FALSE	0	0
149	perfluoroalkanesulfonamido sulfonate betaine D, n=4		NA	S(N(C)CCC[N+](CCCS(=O)(O)=O)(C)C)(=O)(=O)C(F)(F)C(F)(F)C(F)(F)C(F)(F)F	CN(CCC[N+](C)(C)CCCS(=O)(=O)O)S(=O)(=O)C(F)(F)C(F)(F)C(F)(F)C(F)(F)F	C13H21F9N2O5S2	-3.2868	1347.11	3.96541	12.4192	140.36	785.545	3.15697	8.7912	0	27.7223	-0.863815	1	1.43755	FALSE	0	0
150	2-(Heptafluoropropyl)-5-methoxy-1H-indole		CAS_RN: 923569-79-3	COC1=CC2=C(NC(=C2)C(F)(F)C(F)(F)C(F)(F)F)C=C1	COc1ccc2[nH]c(C(F)(F)C(F)(F)C(F)(F)F)cc2c1	C12H8F7NO	0.493	680.24	2.3811	12.1463	184.55	577.651	2.66913	0	0	41.9601	0	0	1.42417	FALSE	0	0
151	4,4,5,5,6,6,6-Heptafluoro-1-(furan-2-yl)hexane-1,3-dione		CAS_RN: 595-26-6	FC(F)(F)C(F)(F)C(F)(F)C(=O)CC(=O)C1=CC=CO1	O=C(CC(=O)C(F)(F)C(F)(F)C(F)(F)F)c1ccco1	C10H5F7O3	-1.348	772.38	2.3811	11.8316	202.452	525.735	2.41351	0	-2.84609	27.88	-1.84109	0	1.405	FALSE	0	0
152	1-[(4,4,5,5,6,6,7,7,8,8,9,9,9-Tridecafluorononanoyl)oxy]pyrrolidine-2,5-dione		CAS_RN: 1262770-54-6	FC(F)(F)C(F)(F)C(F)(F)C(F)(F)C(F)(F)C(F)(F)CCC(=O)ON1C(=O)CCC1=O	O=C(CCC(F)(F)C(F)(F)C(F)(F)C(F)(F)C(F)(F)C(F)(F)F)ON1C(=O)CCC1=O	C13H8F13NO4	-1.7802	1623.42	7.47342	12.6012	214.882	1301.88	2.90867	0	-2.10206	-18.3526	-2.82112	0	1.30341	TRUE	1	0
153	Perfluoro(3,3'-(piperazine-1,4-diyl)dipropanoic acid)		CAS_RN: 948014-40-2	OC(=O)C(F)(F)C(F)(F)N1C(F)(F)C(F)(F)N(C(F)(F)C(F)(F)C(O)=O)C(F)(F)C1(F)F	O=C(O)C(F)(F)C(F)(F)N1C(F)(F)C(F)(F)N(C(F)(F)C(F)(F)C(=O)O)C(F)(F)C1(F)F	C10H2F16N2O4	0.2548	2458.08	10.3637	13.1515	226.246	27.7453	3.00912	7.8408	-4.34176	-6.9854	0	2	0.867819	TRUE	1	0
154	2,2,3,3,4,4,5,5,6,6,6-Undecafluorohexanamide		CAS_RN: 335-54-6	NC(=O)C(F)(F)C(F)(F)C(F)(F)C(F)(F)C(F)(F)F	NC(=O)C(F)(F)C(F)(F)C(F)(F)C(F)(F)C(F)(F)F	C6H2F11NO	2.9503	1240.56	5.67624	12.2042	202.242	199.794	2.36921	0	-3.4906	-56.0473	0	0	1.25704	TRUE	1	0
155	2,2,3,3-Tetrafluoropropyl nonafluorobutane-1-sulfonate		CAS_RN: 66959-14-6	FC(F)C(F)(F)COS(=O)(=O)C(F)(F)C(F)(F)C(F)(F)C(F)(F)F	O=S(=O)(OCC(F)(F)C(F)F)C(F)(F)C(F)(F)C(F)(F)C(F)(F)F	C7H3F13O3S	-2.6069	1172.02	3.9779	12.3015	231.771	-504.323	2.70238	0	0	-48.7356	-3.1462	0	1.46744	FALSE	0	0
156	ether-substituted Perfluoroalkyl (linear) sulfonic acids_i, n=5		NA	S(=O)(O)(=O)C(F)(F)C(F)(F)C(F)(F)C(F)(F)C(F)(F)OC(F)(F)C(C(F)(F)F)(F)C(F)(F)F	O=S(=O)(O)C(F)(F)C(F)(F)C(F)(F)C(F)(F)C(F)(F)OC(F)(F)C(F)(C(F)(F)F)C(F)(F)F	C9HF19O4S	-0.1977	3122.03	11.9238	12.9521	247.645	-31.974	3.13617	7.8589	0	-54.8552	0	1	0.649954	TRUE	1	0
157	(2E)-4,4,5,5,6,6,7,7,8,8,9,9,9-Tridecafluoro-2-nonen-1-ol		CAS_RN: 83706-97-2	OCC=CC(F)(F)C(F)(F)C(F)(F)C(F)(F)C(F)(F)C(F)(F)F	OCC=CC(F)(F)C(F)(F)C(F)(F)C(F)(F)C(F)(F)C(F)(F)F	C9H5F13O	0.4453	1435.5	7.47342	12.4096	203.45	1231.46	2.55585	8.0245	0	-44.061	-1.46593	0	0.878352	TRUE	1	0
158	4,4,5,5,6,6,7,7,8,8,9,9,9-Tridecafluoro-2-nonen-1-ol		CAS_RN: 38550-47-9	OCC=CC(F)(F)C(F)(F)C(F)(F)C(F)(F)C(F)(F)C(F)(F)F	OCC=CC(F)(F)C(F)(F)C(F)(F)C(F)(F)C(F)(F)C(F)(F)F	C9H5F13O	0.4453	1435.5	7.47342	12.4096	203.45	1231.46	2.55585	8.0245	0	-44.061	-1.46593	0	0.878352	TRUE	1	0
159	(2Z)-4,4,5,5,6,6,7,7,8,8,9,9,9-Tridecafluoronon-2-en-1-ol		CAS_RN: 83707-01-1	OCC=C/C(F)(F)C(F)(F)C(F)(F)C(F)(F)C(F)(F)C(F)(F)F	OCC=CC(F)(F)C(F)(F)C(F)(F)C(F)(F)C(F)(F)C(F)(F)F	C9H5F13O	0.4453	1435.5	7.47342	12.4096	203.45	1231.46	2.55585	8.0245	0	-44.061	-1.46593	0	0.878352	TRUE	1	0
160	C4-phosphonic		CAS_RN: 52299-24-8	C(C(C(F)(F)P(=O)(O)O)(F)F)(C(F)(F)F)(F)F	O=P(O)(O)C(F)(F)C(F)(F)C(F)(F)C(F)(F)F	C4H2F9O3P	4.1224	1058.63	3.96541	12.0588	193.591	190.331	1.88672	7.814	0	-36.1862	0	2	1.24912	TRUE	1	0
161	Perfluoro-2,3-bis(2,5-dimethyl-1,4-dioxan-3-oxy)butane		CAS_RN: 61097-98-1	FC(F)(F)C(F)(OC1(F)OC(F)(C(F)(F)F)C(F)(F)OC1(F)C(F)(F)F)C(F)(OC1(F)OC(F)(C(F)(F)F)C(F)(F)OC1(F)C(F)(F)F)C(F)(F)F	FC(F)(F)C1(F)OC(F)(OC(F)(C(F)(F)F)C(F)(OC2(F)OC(F)(C(F)(F)F)C(F)(F)OC2(F)C(F)(F)F)C(F)(F)F)C(F)(C(F)(F)F)OC1(F)F	C16F30O6	-2.7901	3406.38	27.5936	13.6444	250.836	-1.89468	3.42867	0	0	20.6115	0	0	1.57072	FALSE	0	0
162	2,4,4,5,7,7,8,10,10,11,13,13,14,16,16,17,17,18,18,18-Icosafluoro-2,5,8,11,14-pentakis(trifluoromethyl)-3,6,9,12,15-pentaoxaoctadecan-1-ol		CAS_RN: 27617-34-1	OCC(F)(OC(F)(F)C(F)(OC(F)(F)C(F)(OC(F)(F)C(F)(OC(F)(F)C(F)(OC(F)(F)C(F)(F)C(F)(F)F)C(F)(F)F)C(F)(F)F)C(F)(F)F)C(F)(F)F)C(F)(F)F	OCC(F)(OC(F)(F)C(F)(OC(F)(F)C(F)(OC(F)(F)C(F)(OC(F)(F)C(F)(OC(F)(F)C(F)(F)C(F)(F)F)C(F)(F)F)C(F)(F)F)C(F)(F)F)C(F)(F)F)C(F)(F)F	C18H3F35O6	-2.1519	3797.5	25.6364	13.4506	238.83	551.959	3.61242	8.1296	0	-22.0967	-3.89885	0	1.42193	FALSE	0	0
163	1-(Heptafluoropropyl)-4-nitrobenzene		CAS_RN: 1300746-85-3	[O-][N+](=O)c1ccc(cc1)C(F)(F)C(F)(F)C(F)(F)F	O=[N+]([O-])c1ccc(C(F)(F)C(F)(F)C(F)(F)F)cc1	C9H4F7NO2	0.1382	702.42	2.3811	11.8705	192.377	665.228	2.54047	0	0	33.608	0	0	1.42522	FALSE	0	0
164	2-[(1,1,1,2,3,3,3-Heptafluoropropan-2-yl)oxy]-N-phenylacetamide		CAS_RN: 62656-67-1	FC(F)(F)C(F)(OCC(=O)NC1=CC=CC=C1)C(F)(F)F	O=C(COC(F)(C(F)(F)F)C(F)(F)F)Nc1ccccc1	C11H8F7NO2	-0.9557	786.71	2.3811	11.6971	175.747	718.328	2.61918	0	-1.36414	60.8013	-1.75951	0	1.52606	FALSE	0	0
165	1H,1H,2H,2H-Perfluorodecanol sulfate ammonium salt		CAS_RN: 63225-57-0	[NH4+].[O-]S(=O)(=O)OCCC(F)(F)C(F)(F)C(F)(F)C(F)(F)C(F)(F)C(F)(F)C(F)(F)C(F)(F)F	O=S(=O)(O)OCCC(F)(F)C(F)(F)C(F)(F)C(F)(F)C(F)(F)C(F)(F)C(F)(F)C(F)(F)F	C10H5F17O4S	-1.0623	2133.93	11.2406	12.8173	208.199	306.419	2.96156	8.0967	0	-68.8174	-3.09577	1	0.795518	TRUE	1	0
166	double bond-, di-ether substituted perfluoroalkyl (linear) sulfonic acids, C7		NA	FC(F)(C(S(=O)(O)=O)(F)F)OC(F)(C(F)(F)F)C(F)(F)O/C(F)=C(F)F	O=S(=O)(O)C(F)(F)C(F)(F)OC(F)(C(F)(F)F)C(F)(F)OC(F)=C(F)F	C7HF13O5S	-1.3481	1339.16	4.7451	12.3699	242.852	190.349	2.62988	7.923	-3.9471	-31.3071	0	1	0.842023	TRUE	1	0
167	2-(Heptafluoropropyl)-1-phenyl-4,5-dihydro-1H-imidazole		CAS_RN: 1069085-53-5	FC(F)(F)C(F)(F)C(F)(F)C1=NCCN1c1ccccc1	FC(F)(F)C(F)(F)C(F)(F)C1=NCCN1c1ccccc1	C12H9F7N2	-1.7722	670.75	2.3811	12.1137	191.21	1277.74	2.61918	0	-1.57313	28.8623	-0.283973	0	1.44064	FALSE	0	0
168	Perfluoro-2,2,9,9-tetramethyldeca-3,7-diene		CAS_RN: 96288-56-1	FC(=C(F)C(C(F)(F)F)(C(F)(F)F)C(F)(F)F)C(F)(F)C(F)(F)C(F)=C(F)C(C(F)(F)F)(C(F)(F)F)C(F)(F)F	FC(=C(F)C(C(F)(F)F)(C(F)(F)F)C(F)(F)F)C(F)(F)C(F)(F)C(F)=C(F)C(C(F)(F)F)(C(F)(F)F)C(F)(F)F	C14F26	-0.5732	5578.06	11.5239	13.2071	261.273	-535.231	3.21821	0	-6.14666	88.1053	0	0	1.83053	FALSE	0	0
169	3-Nitrophenyl heptafluorobutanoate		CAS_RN: 52512-15-9	[O-][N+](=O)C1=CC(OC(=O)C(F)(F)C(F)(F)C(F)(F)F)=CC=C1	O=C(Oc1cccc([N+](=O)[O-])c1)C(F)(F)C(F)(F)C(F)(F)F	C10H4F7NO4	-1.0156	789.49	2.3811	11.9	234.157	655.85	2.60184	0	-3.19878	24.4211	0	0	1.3744	FALSE	0	0
170	1,2-dichloro(perfluoro-1-(methoxymethoxy)ethane)		CAS_RN: 874288-98-9	FC(F)(F)OC(F)(F)OC(F)(Cl)C(F)(F)Cl	FC(F)(F)OC(F)(F)OC(F)(Cl)C(F)(F)Cl	C4Cl2F8O2	-4.3782	697.86	2.40685	11.3864	267.207	197.795	2.13193	0	0	13.0495	0	0	1.81651	FALSE	0	0
171	2-{[(2,2,3,3,4,4,5,5,6,6,7,7,8,8,9,9-Hexadecafluorononyl)oxy]methyl}oxirane		CAS_RN: 125370-60-7	FC(F)C(F)(F)C(F)(F)C(F)(F)C(F)(F)C(F)(F)C(F)(F)C(F)(F)COCC1CO1	FC(F)C(F)(F)C(F)(F)C(F)(F)C(F)(F)C(F)(F)C(F)(F)C(F)(F)COCC1CO1	C12H8F16O2	-2.0173	1938.4	9.33326	12.7518	203.143	1095.55	2.903	0	0	-86.0363	-2.83265	0	1.30898	TRUE	1	0
172	n:3 fluorotelomer betaine-related, n=2		NA	C[N+](CC(O)=O)(C)CCCC(F)(F)C(F)(F)C(F)(F)C(F)(F)C(F)(F)F	C[N+](C)(CCCC(F)(F)C(F)(F)C(F)(F)C(F)(F)C(F)(F)F)CC(=O)O	C12H14F11NO2	-3.4221	1304.65	5.67624	12.2914	143.695	1128.55	2.83602	8.5372	-1.39959	4.788	-2.16188	1	1.39648	FALSE	0	0
173	1-(Heptafluoropropyl)-4-methylisoquinoline		CAS_RN: 70414-16-3	Cc1cnc(c2ccccc12)C(F)(F)C(F)(F)C(F)(F)F	Cc1cnc(C(F)(F)C(F)(F)C(F)(F)F)c2ccccc12	C13H8F7N	0.2195	699.5	2.3811	12.1947	201.997	924.665	2.50741	0	0	56.3738	0	0	1.42906	FALSE	0	0
174	Perfluoro-2,5,8,11-tetraoxadodecane		CAS_RN: 64028-04-2	FC(F)(F)OC(F)(F)C(F)(F)OC(F)(F)C(F)(F)OC(F)(F)C(F)(F)OC(F)(F)F	FC(F)(F)OC(F)(F)C(F)(F)OC(F)(F)C(F)(F)OC(F)(F)C(F)(F)OC(F)(F)F	C8F18O4	-5.0801	1569.38	7.46129	12.3686	217.01	-15.4483	2.85175	0	0	-7.8703	0	0	1.57907	FALSE	0	0
175	multiple H-substituted, multiple ether-substituted perfluoroalkyl alcohols, n=4, m=11		NA	FC(F)(F)C(F)(F)C(F)(F)C(F)(F)C(F)(F)C(F)(F)C(F)(F)C(F)(F)CCOCCOCCOCCOCCOCCOCCOCCOCCOCCOCCO[H]	OCCOCCOCCOCCOCCOCCOCCOCCOCCOCCOCCC(F)(F)C(F)(F)C(F)(F)C(F)(F)C(F)(F)C(F)(F)C(F)(F)C(F)(F)F	C30H45F17O11	-5.1314	2354.75	11.2406	12.8618	136.737	3889.49	3.43485	8.5493	0	-38.7608	-2.67556	0	2.18927	FALSE	0	0
176	Decane-1,10-diyl bis(heptafluorobutanoate)		CAS_RN: 426-64-2	FC(F)(F)C(F)(F)C(F)(F)C(=O)OCCCCCCCCCCOC(=O)C(F)(F)C(F)(F)C(F)(F)F	O=C(OCCCCCCCCCCOC(=O)C(F)(F)C(F)(F)C(F)(F)F)C(F)(F)C(F)(F)C(F)(F)F	C18H20F14O4	-2.6704	1443.42	2.50201	12.3079	149.628	4517.67	3.28601	0	-3.03665	41.3734	-0.85541	0	2.30215	FALSE	0	0
177	4-Heptadecafluorooctanesulfonamidobenzenesulfonic acid sodium salt		CAS_RN: 172398-80-0	[Na+].[O-]S(=O)(=O)C1=CC=C(NS(=O)(=O)C(F)(F)C(F)(F)C(F)(F)C(F)(F)C(F)(F)C(F)(F)C(F)(F)C(F)(F)F)C=C1	O=S(=O)(O)c1ccc(NS(=O)(=O)C(F)(F)C(F)(F)C(F)(F)C(F)(F)C(F)(F)C(F)(F)C(F)(F)C(F)(F)F)cc1	C14H6F17NO5S2	1.5435	2429.76	11.2406	13.0565	219.772	531.447	3.40209	8.8253	0	-20.1735	0	1	0.65916	TRUE	1	0
178	Triethoxy(3,3,4,4,5,5,6,6,7,7,8,8,8-tridecafluorooctyl)silane		CAS_RN: 51851-37-7	FC(F)(F)C(F)(F)C(F)(F)C(F)(F)C(F)(F)C(F)(F)CC[Si](OCC)(OCC)OCC	CCO[Si](CCC(F)(F)C(F)(F)C(F)(F)C(F)(F)C(F)(F)C(F)(F)F)(OCC)OCC	C14H19F13O3Si	-1.9886	1572.36	7.47342	12.5794	175.413	1639.28	3.11283	0	0	8.5069	-2.36336	0	1.50449	FALSE	0	0
179	Cyclopentene, 1,3,3,4,4,5,5-heptafluoro-		CAS_RN: 1892-03-1	FC1=CC(F)(F)C(F)(F)C1(F)F	FC1=CC(F)(F)C(F)(F)C1(F)F	C5HF7	0	544	2.3811	11.8146	0	-89.2839	1.58175	0	-2.79398	-39.8878	0	0	2.90993	FALSE	0	0
180	3-[(Perfluoropentane-1-sulfonyl)amino]-N,N-dimethylpropan-1-amine N-oxide potassium salt		CAS_RN: 178094-72-9	[K+].C[N+](C)([O-])CCC[N-]S(=O)(=O)C(F)(F)C(F)(F)C(F)(F)C(F)(F)C(F)(F)F	C[N+](C)([O-])CCCNS(=O)(=O)C(F)(F)C(F)(F)C(F)(F)C(F)(F)C(F)(F)F	C10H13F11N2O3S	-2.9732	1463.16	5.67624	12.4643	167.78	1579.71	2.93319	0	0	-16.7672	-1.11555	0	1.5327	FALSE	0	0
181	3-(Butane-1-sulfonyl)-4-(1,1,1,2,3,3,3-heptafluoropropan-2-yl)-2-methylbenzoic acid		CAS_RN: 1355554-53-8	CCCCS(=O)(=O)c1c(C)c(ccc1C(F)(C(F)(F)F)C(F)(F)F)C(O)=O	CCCCS(=O)(=O)c1c(C(F)(C(F)(F)F)C(F)(F)F)ccc(C(=O)O)c1C	C15H15F7O4S	1.9726	1126.34	2.3811	12.4832	193.824	1256.66	3.12936	9.0288	-1.7592	103.479	-0.720694	1	1.15999	TRUE	1	0
182	Undecafluorocyclohexane		CAS_RN: 308-24-7	FC1C(F)(F)C(F)(F)C(F)(F)C(F)(F)C1(F)F	FC1C(F)(F)C(F)(F)C(F)(F)C(F)(F)C1(F)F	C6HF11	0	1424.58	6.08364	12.505	159.901	-94.1029	2.23612	0	0	-68.9095	0	0	1.35381	TRUE	1	0
183	1,1,2,2-Tetrafluoro-1-iodo-2-(trifluoromethoxy)ethane		CAS_RN: 1561-52-0	FC(F)(F)OC(F)(F)C(F)(F)I	FC(F)(F)OC(F)(F)C(F)(F)I	C3F7IO	-3.2641	435.28	1.65096	10.9865	262.242	-1400.23	1.58175	0	0	-9.521	0	0	1.9496	FALSE	0	0
184	[1,1,1,2,2,3,3,4,4,14,14,15,15,16,16,17,17,17-Octadecafluoro-10-(4,4,5,5,6,6,7,7,7-nonafluoroheptyl)heptadec-9-en-8-yl]-lambda~2~-stannanyl		CAS_RN: 217805-03-3	FC(F)(CCCC([SnH])C=C(CCCC(F)(F)C(F)(F)C(F)(F)C(F)(F)F)CCCC(F)(F)C(F)(F)C(F)(F)C(F)(F)F)C(F)(F)C(F)(F)C(F)(F)F |^1:7|	FC(F)(F)C(F)(F)C(F)(F)C(F)(F)CCCC(=CC([SnH])CCCC(F)(F)C(F)(F)C(F)(F)C(F)(F)F)CCCC(F)(F)C(F)(F)C(F)(F)C(F)(F)F	C24H21F27Sn	-7.9279	2649.98	9.56395	12.9952	173.196	1251.21	3.49265	0	-0.788101	73.3702	-2.6065	0	2.18752	FALSE	0	0
185	1,1,1,2,4,4,5,5-Octafluoro-5-iodo-2-(trifluoromethyl)pentan-3-one		CAS_RN: 93822-96-9	FC(F)(F)C(F)(C(=O)C(F)(F)C(F)(F)I)C(F)(F)F	O=C(C(F)(F)C(F)(F)I)C(F)(C(F)(F)F)C(F)(F)F	C6F11IO	-0.8415	1293.58	4.7451	12.1505	258.808	-504.139	2.446	0	-4.55711	-17.1689	0	0	1.41604	FALSE	0	0
186	Praseodymium, tris[6,6,7,7,8,8,8-heptafluoro-2,2-di(methyl-d3)-3,5-octanedion-1,1,1-d3-ato-O,O']- (9CI)		CAS_RN: 42942-19-8	[Pr+3].[2H]C([2H])([2H])C(C(=O)C=C(/[O-])C(F)(F)C(F)(F)C(F)(F)F)(C([2H])([2H])[2H])C([2H])([2H])[2H].[2H]C([2H])([2H])C(C(=O)C=C(/[O-])C(F)(F)C(F)(F)C(F)(F)F)(C([2H])([2H])[2H])C([2H])([2H])[2H].[2H]C([2H])([2H])C(C(=O)C=C(/[O-])C(F)(F)C(F)(F)C(F)(F)F)(C([2H])([2H])[2H])C([2H])([2H])[2H]	[2H]C([2H])([2H])C(C(=O)C=C(O)C(F)(F)C(F)(F)C(F)(F)F)(C([2H])([2H])[2H])C([2H])([2H])[2H]	C10H11F7O2	-0.486	811.73	2.40685	11.795	175.73	534.57	2.38268	8.7199	-2.62986	39.3053	0	0	1.23272	TRUE	1	0
187	(1E)-1,2,3,3,4,4,5,5,6,6,6-Undecafluoro-1-methoxyhex-1-ene		CAS_RN: 62949-64-8	COC(F)=C(/F)C(F)(F)C(F)(F)C(F)(F)C(F)(F)F	COC(F)=C(F)C(F)(F)C(F)(F)C(F)(F)C(F)(F)F	C7H3F11O	-3.3485	1131.38	3.96541	12.039	211.429	335.99	2.40826	0	-3.88525	-54.7094	0	0	1.4315	FALSE	0	0
188	Hexane, 1-(ethenylsulfinyl)-1,1,2,2,3,3,4,4,5,5,6,6,6-tridecafluoro-		CAS_RN: 680187-85-3	FC(F)(F)C(F)(F)C(F)(F)C(F)(F)C(F)(F)C(F)(F)S(=O)C=C	C=CS(=O)C(F)(F)C(F)(F)C(F)(F)C(F)(F)C(F)(F)C(F)(F)F	C8H3F13OS	-0.4129	1533.33	7.47342	12.4738	221.006	176.696	2.66262	0	0	-48.9294	0	0	1.13005	TRUE	1	0
189	3-Methylbutyl 2,3,3,3-tetrafluoro-2-(heptafluoropropoxy)propanoate		CAS_RN: 183873-56-5	CC(C)CCOC(=O)C(F)(OC(F)(F)C(F)(F)C(F)(F)F)C(F)(F)F	CC(C)CCOC(=O)C(F)(OC(F)(F)C(F)(F)C(F)(F)F)C(F)(F)F	C11H11F11O3	-3.9681	1084.06	4.5088	12.1494	185.036	2167.26	2.7627	0	-3.23769	45.7185	-0.955511	0	1.74343	FALSE	0	0
190	Perfluorotetracosane		CAS_RN: 1766-41-2	FC(F)(F)C(F)(F)C(F)(F)C(F)(F)C(F)(F)C(F)(F)C(F)(F)C(F)(F)C(F)(F)C(F)(F)C(F)(F)C(F)(F)C(F)(F)C(F)(F)C(F)(F)C(F)(F)C(F)(F)C(F)(F)C(F)(F)C(F)(F)C(F)(F)C(F)(F)C(F)(F)C(F)(F)F	FC(F)(F)C(F)(F)C(F)(F)C(F)(F)C(F)(F)C(F)(F)C(F)(F)C(F)(F)C(F)(F)C(F)(F)C(F)(F)C(F)(F)C(F)(F)C(F)(F)C(F)(F)C(F)(F)C(F)(F)C(F)(F)C(F)(F)C(F)(F)C(F)(F)C(F)(F)C(F)(F)C(F)(F)F	C24F50	-0.3309	6779.25	0	14.0091	243.812	-1.81886	3.67627	0	0	-288.998	0	0	1.92377	FALSE	0	0
191	Octafluoroadipic acid	OF2CA	CAS_RN: 336-08-3	O=C(C(C(C(C(C(O)=O)(F)F)(F)F)(F)F)(F)F)O	O=C(O)C(F)(F)C(F)(F)C(F)(F)C(F)(F)C(=O)O	C6H2F8O4	4.1792	1092.5	3.96541	12.0579	204.814	192.447	2.36175	7.5889	-3.8117	-58.8595	0	2	1.15156	TRUE	1	0
192	4-Chlorobenzenediazonium perfluorobutanoate perfluorobutanoic acid (1:1:1)		CAS_RN: 630-31-9	ClC1=CC=C(C=C1)[N+]#N.OC(=O)C(F)(F)C(F)(F)C(F)(F)F.[O-]C(=O)C(F)(F)C(F)(F)C(F)(F)F	O=C(O)C(F)(F)C(F)(F)C(F)(F)F	C4HF7O2	1.9028	665.5	2.3811	11.4497	159.721	105.806	1.58175	7.4102	-3.53257	-27.9449	0	1	1.35047	TRUE	1	0
193	3-(Perfluorooctyl)propyl iodide		CAS_RN: 200112-75-0	FC(F)(F)C(F)(F)C(F)(F)C(F)(F)C(F)(F)C(F)(F)C(F)(F)C(F)(F)CCCI	FC(F)(F)C(F)(F)C(F)(F)C(F)(F)C(F)(F)C(F)(F)C(F)(F)C(F)(F)CCCI	C11H6F17I	-0.9772	2036.71	11.2406	12.7791	220.099	-1520.17	2.98788	0	0	-50.7804	-2.29734	0	1.34281	TRUE	1	0
194	N,N-Dimethyl-N-(propan-2-yl)propan-2-aminium nonafluorobutane-1-sulfonate		CAS_RN: 374571-81-0	CC(C)[N+](C)(C)C(C)C.[O-]S(=O)(=O)C(F)(F)C(F)(F)C(F)(F)C(F)(F)F	CC(C)[N+](C)(C)C(C)C	C8H20N	-9.5662	176	0	10.2803	49.6733	-516.642	2.33355	0	0	10.5623	0	0	3.27252	FALSE	0	0
195	Sodium 2-((nonafluorobutylsulfonylamino)methyl)benzenesulfonate		CAS_RN: 68299-19-4	C1=C(CN[S](=O)(=O)C(F)(F)C(F)(F)C(F)(F)C(F)(F)F)C(=CC=C1)[S]([O-])(=O)=O.[Na+]	O=S(=O)(O)c1ccccc1CNS(=O)(=O)C(F)(F)C(F)(F)C(F)(F)C(F)(F)F	C11H8F9NO5S2	2.0408	1258.37	3.96541	12.4439	187.327	719.914	2.93903	9.0475	0	31.7552	-1.46502	1	0.964352	TRUE	1	0
196	Bromotrifluoroethylene		CAS_RN: 598-73-2	FC(F)=C(F)Br	FC(F)=C(F)Br	C2BrF3	-1.4008	0	0	8.6058	0	-708.06	1.16069	0	-2.13683	-19.0393	0	0	3.52288	FALSE	0	0
197	(Nonafluorobutyl)carbonimidoyl		CAS_RN: 424-32-8	FC(F)=NC(F)(F)C(F)(F)C(F)(F)C(F)(F)F	FC(F)=NC(F)(F)C(F)(F)C(F)(F)C(F)(F)F	C5F11N	-3.1186	1046.5	3.96541	11.8661	217.329	-21.5242	1.58175	0	-3.77069	-31.1959	0	0	1.54951	FALSE	0	0
198	N-ethyl perfluorohexanesulfonamido polyethylene glycol, n=6, m=8		NA	OCCOCCOCCOCCOCCOCCOCCOCCOCCN(CC)S(=O)(=O)C(F)(F)C(F)(F)C(F)(F)C(F)(F)C(F)(F)C(F)(F)F	CCN(CCOCCOCCOCCOCCOCCOCCOCCOCCO)S(=O)(=O)C(F)(F)C(F)(F)C(F)(F)C(F)(F)C(F)(F)C(F)(F)F	C26H42F13NO11S	-5.1382	1999.34	7.47342	12.7779	136.898	3715.57	3.41592	8.5438	0	-23.114	-1.21906	0	2.1113	FALSE	0	0
199	1,1,1,2,2,3,3,4,4,5,5,6,6,7,7,8,8,15,15,16,16,17,17,18,18,19,19,20,20,21,21,22,22,22-Tetratriacontafluorodocosane		CAS_RN: 959462-55-6	FC(F)(F)C(F)(F)C(F)(F)C(F)(F)C(F)(F)C(F)(F)C(F)(F)C(F)(F)CCCCCCC(F)(F)C(F)(F)C(F)(F)C(F)(F)C(F)(F)C(F)(F)C(F)(F)C(F)(F)F	FC(F)(F)C(F)(F)C(F)(F)C(F)(F)C(F)(F)C(F)(F)C(F)(F)C(F)(F)CCCCCCC(F)(F)C(F)(F)C(F)(F)C(F)(F)C(F)(F)C(F)(F)C(F)(F)C(F)(F)F	C22H12F34	-0.5895	4101	19.4802	13.4779	196.422	4403.39	3.52337	0	0	-86.5803	-3.22714	0	2.12306	FALSE	0	0
200	N-[(1,1,2,2,3,3,4,4,5,5,6,6,7,7,8,8,8-Heptadecafluorooctyl)sulfonyl]glycine (FOSAA)	FOSAA	CAS_RN: 2806-24-8	C(C(=O)O)NS(=O)(=O)C(C(C(C(C(C(C(C(F)(F)F)(F)F)(F)F)(F)F)(F)F)(F)F)(F)F)(F)F	O=C(O)CNS(=O)(=O)C(F)(F)C(F)(F)C(F)(F)C(F)(F)C(F)(F)C(F)(F)C(F)(F)C(F)(F)F	C10H4F17NO4S	1.1845	2291.22	11.2406	12.9342	226.855	200.869	3.07189	8.0234	-2.48117	-83.0898	-2.29328	1	0.439464	TRUE	1	1
201	(3,3,4,4,5,5,6,6,7,7,8,8,8-Tridecafluorooctyl)propanedioic acid		CAS_RN: 26564-96-5	OC(=O)C(CCC(F)(F)C(F)(F)C(F)(F)C(F)(F)C(F)(F)C(F)(F)F)C(O)=O	O=C(O)C(CCC(F)(F)C(F)(F)C(F)(F)C(F)(F)C(F)(F)C(F)(F)F)C(=O)O	C11H7F13O4	1.7852	1711.29	7.47342	12.51	185.353	1163.36	2.93402	8.3231	-2.43767	-11.0384	-2.88241	2	1.04102	TRUE	1	0
202	1-Methyl-4H-[1,2,4]triazolo[4,3-a][1]benzazepin-6-yl nonafluorobutane-1-sulfonate		CAS_RN: 1588522-06-8	Cc1nnc2CC=C(OS(=O)(=O)C(F)(F)C(F)(F)C(F)(F)C(F)(F)F)c3ccccc3-n12	Cc1nnc2n1-c1ccccc1C(OS(=O)(=O)C(F)(F)C(F)(F)C(F)(F)C(F)(F)F)=CC2	C16H10F9N3O3S	-1.3223	1271.24	3.96541	12.732	229.65	1483.66	3.22123	0	-0.937582	27.6057	-0.308589	0	1.33807	TRUE	1	0
203	4-(Nonafluorobutyl)benzene-1,2-dicarbonitrile		CAS_RN: 1207299-71-5	FC(F)(F)C(F)(F)C(F)(F)C(F)(F)c1ccc(C#N)c(c1)C#N	N#Cc1ccc(C(F)(F)C(F)(F)C(F)(F)C(F)(F)F)cc1C#N	C12H3F9N2	0	1003.29	3.96541	12.247	229.058	673.223	2.75202	0	0	41.6164	0	0	1.33029	TRUE	1	0
204	2-Ethyl-3,3,4,4,5,5,6,6,7,7,8,8,8-tridecafluorooctanoic acid		CAS_RN: 136022-87-2	CCC(C(O)=O)C(F)(F)C(F)(F)C(F)(F)C(F)(F)C(F)(F)C(F)(F)F	CCC(C(=O)O)C(F)(F)C(F)(F)C(F)(F)C(F)(F)C(F)(F)C(F)(F)F	C10H7F13O2	0.1836	1740.75	7.47342	12.5501	182.644	1679.29	2.79917	8.256	-2.89456	-19.0779	-1.56028	1	0.85628	TRUE	1	0
205	1-(2,2,3,3,4,4,4-Heptafluorobutoxy)-4-nitrobenzene		CAS_RN: 109230-68-4	[O-][N+](=O)c1ccc(OCC(F)(F)C(F)(F)C(F)(F)F)cc1	O=[N+]([O-])c1ccc(OCC(F)(F)C(F)(F)C(F)(F)F)cc1	C10H6F7NO3	-1.3858	679.79	2.3811	11.7327	178.184	349.802	2.61918	0	0	24.6687	-2.23877	0	1.53291	FALSE	0	0
206	1-Methyl-4-(tridecafluorohexyl)benzene		CAS_RN: 128720-26-3	Cc1ccc(cc1)C(F)(F)C(F)(F)C(F)(F)C(F)(F)C(F)(F)C(F)(F)F	Cc1ccc(C(F)(F)C(F)(F)C(F)(F)C(F)(F)C(F)(F)C(F)(F)F)cc1	C13H7F13	0	1526.29	7.47342	12.5863	200.946	1235.28	2.67635	0	0	14.2005	0	0	1.26748	TRUE	1	0
207	Perfluorooctanesulfonamido ethanol		CAS_RN: 10116-92-4	FC(F)(C(F)(F)C(F)(F)C(F)(F)C(F)(F)F)C(F)(F)C(F)(F)C(F)(F)S(=O)(NCCO)=O	O=S(=O)(NCCO)C(F)(F)C(F)(F)C(F)(F)C(F)(F)C(F)(F)C(F)(F)C(F)(F)C(F)(F)F	C10H6F17NO3S	0.9415	2282.06	11.2406	12.9228	216.123	1474.74	3.06561	8.1762	0	-79.6628	-1.6405	0	0.819895	TRUE	1	0
208	Triethoxy(1,1,2,2,3,3,6,6,6-nonafluorohexyl)silane		CAS_RN: 102390-98-7	CCO[Si](OCC)(OCC)C(F)(F)C(F)(F)C(F)(F)CCC(F)(F)F	CCO[Si](OCC)(OCC)C(F)(F)C(F)(F)C(F)(F)CCC(F)(F)F	C12H19F9O3Si	-2.0798	846.87	2.7016	12.226	182.662	1338.03	3.07471	0	0	3.6478	-2.50409	0	1.53255	FALSE	0	0
209	9-[(4,4,5,5,5-Pentafluoropentyl)sulfanyl]nonan-1-ol		CAS_RN: 511545-94-1	OCCCCCCCCCSCCCC(F)(F)C(F)(F)F	OCCCCCCCCCSCCCC(F)(F)C(F)(F)F	C14H25F5OS	-0.2421	277.75	1	10.8661	125.442	1014.65	2.90814	8.6023	0	32.3955	-1.04264	0	1.78205	FALSE	0	0
210	1-(2,3-Dihydro-1H-indol-1-yl)-2,2,3,3,4,4,4-heptafluoro-1-butanone		CAS_RN: 543708-46-9	FC(F)(F)C(F)(F)C(F)(F)C(=O)N1CCC2=CC=CC=C12	O=C(N1CCc2ccccc21)C(F)(F)C(F)(F)C(F)(F)F	C12H8F7NO	-0.7717	755	2.3811	12.1568	181.135	1279.45	2.61066	0	-2.56039	41.9757	-0.373306	0	1.44367	FALSE	0	0
211	n:2 fluorotelomer thio proponic acids, n=6		NA	O=C(O)CCSCCC(F)(F)C(F)(F)C(F)(F)C(F)(F)C(F)(F)C(F)(F)C(F)(F)C(F)(F)C(F)(F)C(F)(F)C(F)(F)C(F)(F)F	O=C(O)CCSCCC(F)(F)C(F)(F)C(F)(F)C(F)(F)C(F)(F)C(F)(F)C(F)(F)C(F)(F)C(F)(F)C(F)(F)C(F)(F)C(F)(F)F	C17H9F25O2S	0.7499	3262.98	19.1782	13.2721	213.318	990.022	3.36662	8.2933	-1.62792	-78.9328	-2.74245	1	0.731751	TRUE	1	0
212	3-Hexyl-1-methyl-1H-Imidazolium perfluorobutanesulfonate		CAS_RN: 1001557-05-6	CCCCCCN1C[NH+](C)C=C1.[O-]S(=O)(=O)C(F)(F)C(F)(F)C(F)(F)C(F)(F)F	CCCCCCN1C=CN(C)C1	C10H20N2	-6.0326	119	0	10.2291	110.637	-356.192	2.28921	0	0	13.8577	1.07552	0	2.57056	FALSE	0	0
213	2,2,3,3,4,4,4-Heptafluorobutanimidohydrazide		CAS_RN: 663-24-1	NNC(=N)C(F)(F)C(F)(F)C(F)(F)F	N=C(NN)C(F)(F)C(F)(F)C(F)(F)F	C4H4F7N3	5.9228	674.38	2.3811	11.5194	134.609	680.909	1.58175	0	-2.41683	-30.7423	0	0	2.0027	FALSE	0	0
214	double bond-, H-, ether-substituted perfluoroalkyl (linear) carboyxlic acids, n=10		NA	F/C(C(F)(F)C(F)(F)C(F)(F)C(F)(F)C(F)(F)C(F)(F)C(F)(F)C(F)(F)C(F)(F)C(F)(F)OCC(O)=O)=CC(F)(F)F	O=C(O)COC(F)(F)C(F)(F)C(F)(F)C(F)(F)C(F)(F)C(F)(F)C(F)(F)C(F)(F)C(F)(F)C(F)(F)C(F)=CC(F)(F)F	C15H4F24O3	-0.1411	2970.69	15.9001	13.1717	233.017	86.2124	3.31278	7.91	-4.9531	-118.42	-2.91297	1	0.929688	TRUE	1	0
215	N-ethyl perfluoropentanesulfonamido polyethylene glycol, n=5, m=2		NA	OCCOCCOCCN(CC)S(=O)(=O)C(F)(F)C(F)(F)C(F)(F)C(F)(F)C(F)(F)F	CCN(CCOCCOCCO)S(=O)(=O)C(F)(F)C(F)(F)C(F)(F)C(F)(F)C(F)(F)F	C13H18F11NO5S	-3.3552	1529.28	5.67624	12.5464	154.406	2471.43	3.09839	8.4279	0	-18.2288	-1.09513	0	1.57472	FALSE	0	0
216	Silver, (6,6,7,7,8,8,8-heptafluoro-2,2-dimethyl-3,5-octanedionato-βO3,βO5)(triethylphosphine)-		CAS_RN: 165461-74-5	CCP(CC)(CC)[Ag]1OC(CC(O1)C(F)(F)C(F)(F)C(F)(F)F)C(C)(C)C	CC[PH](CC)(CC)[Ag]1OC(C(C)(C)C)CC(C(F)(F)C(F)(F)C(F)(F)F)O1	C19H29AgF7O2P	2.5667	0	2.40685	12.3728	152.445	-4651.29	0	0	0	89.7294	0	0	2.90679	FALSE	0	0
217	3,4,4,4-Tetrafluoro-3-(heptafluoropropoxy)but-1-ene		CAS_RN: 131628-34-7	FC(F)(F)C(F)(F)C(F)(F)OC(F)(C=C)C(F)(F)F	C=CC(F)(OC(F)(F)C(F)(F)C(F)(F)F)C(F)(F)F	C7H3F11O	-3.3485	840.13	4.5088	11.9452	205.267	576.146	2.37286	0	0	-4.0642	0	0	1.50191	FALSE	0	0
218	3,3,4,4,5,5,6,6,7,7,8,8,9,9,10,10,11,11,12,12,12-Henicosafluorododecyl 3,3,4,4,5,5,6,6,7,7,8,8,9,9,10,10,10-heptadecafluorodecyl hydrogen phosphate		CAS_RN: 1158182-60-5	FC(C(F)(F)C(F)(F)F)(C(F)(C(F)(C(F)(C(F)(C(F)(F)CCOP(O)(OCCC(F)(C(F)(F)C(F)(F)C(F)(F)C(F)(F)C(F)(F)C(F)(F)C(F)(C(F)(F)C(F)(F)F)F)F)=O)F)F)F)F)F	O=P(O)(OCCC(F)(F)C(F)(F)C(F)(F)C(F)(F)C(F)(F)C(F)(F)C(F)(F)C(F)(F)F)OCCC(F)(F)C(F)(F)C(F)(F)C(F)(F)C(F)(F)C(F)(F)C(F)(F)C(F)(F)C(F)(F)C(F)(F)F	C22H9F38O4P	-0.98	4840.65	22.386	13.6466	212.439	797.764	3.65021	9.1253	0	-152.785	-3.87653	1	1.3268	TRUE	1	0
219	3,3,4,4,5,5,6,6,6-nonafluorohexyl dihydrogen phosphate		NA	O=P(O)(O)OCCC(F)(F)C(F)(F)C(F)(F)C(F)(F)F	O=P(O)(O)OCCC(F)(F)C(F)(F)C(F)(F)C(F)(F)F	C6H6F9O4P	-0.0169	942.64	3.96541	11.9224	166.854	14.4059	2.41769	8.1582	0	-11.7288	-2.43066	2	1.22887	TRUE	1	0
220	4-(Nonafluorobutyl)benzonitrile		CAS_RN: 137052-16-5	FC(F)(F)C(F)(F)C(F)(F)C(F)(F)c1ccc(cc1)C#N	N#Cc1ccc(C(F)(F)C(F)(F)C(F)(F)C(F)(F)F)cc1	C11H4F9N	0	951	3.96541	12.1435	208.872	857.5	2.61918	0	0	33.7954	0	0	1.3424	TRUE	1	0
221	bis((Perfluoropropyl)methyl) phosphorochloridoate		CAS_RN: 6780-81-0	FC(F)(F)C(F)(F)C(F)(F)COP(Cl)(=O)OCC(F)(F)C(F)(F)C(F)(F)F	O=P(Cl)(OCC(F)(F)C(F)(F)C(F)(F)F)OCC(F)(F)C(F)(F)C(F)(F)F	C8H4ClF14O3P	-3.102	1119.75	3.95258	12.21	220.246	-1252.75	2.71729	0	0	-21.8877	-2.95134	0	1.59391	FALSE	0	0
222	Heptafluoro-2-iodopropane		CAS_RN: 677-69-0	FC(F)(F)C(F)(I)C(F)(F)F	FC(F)(F)C(F)(I)C(F)(F)F	C3F7I	-1.2558	576	2.3811	11.1561	0	-3661.44	1.58175	0	0	0.7613	0	0	3.3845	FALSE	0	0
223	Octafluorocyclobutane		CAS_RN: 115-25-3	FC1(F)C(F)(F)C(F)(F)C1(F)F	FC1(F)C(F)(F)C(F)(F)C1(F)F	C4F8	0	512	4.7622	12.298	0	6.93e-14	1.58175	0	0	-84.392	0	0	2.88632	FALSE	0	0
224	N-ethyl perfluoropentanesulfonamido polyethylene glycol, n=5, m=7		NA	OCCOCCOCCOCCOCCOCCOCCOCCN(CC)S(=O)(=O)C(F)(F)C(F)(F)C(F)(F)C(F)(F)C(F)(F)F	CCN(CCOCCOCCOCCOCCOCCOCCOCCO)S(=O)(=O)C(F)(F)C(F)(F)C(F)(F)C(F)(F)C(F)(F)F	C23H38F11NO10S	-5.1952	1673.03	5.67624	12.5996	134.832	3193.71	3.38981	8.5317	0	-13.4757	-1.10556	0	2.0265	FALSE	0	0
225	Perfluorodecahydro-1-t-butylnaphthalene		CAS_RN: 118914-94-6	FC(F)(F)C(C(F)(F)F)(C(F)(F)F)C1(F)C(F)(F)C(F)(F)C(F)(F)C2(F)C(F)(F)C(F)(F)C(F)(F)C(F)(F)C12F	FC(F)(F)C(C(F)(F)F)(C(F)(F)F)C1(F)C(F)(F)C(F)(F)C(F)(F)C2(F)C(F)(F)C(F)(F)C(F)(F)C(F)(F)C21F	C14F26	0.5452	5302.13	34.6135	13.9931	245.303	-253.762	3.21821	0	0	30.0014	0	0	1.71695	FALSE	0	0
226	Perfluoro(2-methyl-3-oxahexanoyl) fluoride		CAS_RN: 2062-98-8	FC(=O)C(F)(OC(F)(F)C(F)(F)C(F)(F)F)C(F)(F)F	O=C(F)C(F)(OC(F)(F)C(F)(F)C(F)(F)F)C(F)(F)F	C6F12O2	-2.8197	1086.63	4.5088	12.0508	244.355	7.38938	2.35796	0	-4.38644	-34.6157	0	0	1.45997	FALSE	0	0
227	Potassium 5,5,6,6,7,7,8,8,8-nonafluorooctane-1-sulfonate		CAS_RN: 1604816-60-5	[K+].[O-]S(=O)(=O)CCCCC(F)(F)C(F)(F)C(F)(F)C(F)(F)F	O=S(=O)(O)CCCCC(F)(F)C(F)(F)C(F)(F)C(F)(F)F	C8H9F9O3S	0.3392	929.63	3.96541	11.9223	159.333	1018.34	2.4662	8.3588	0	9.6211	-2.08623	1	1.19856	TRUE	1	0
228	Perfluoromethylcyclopentane		CAS_RN: 1805-22-7	FC(F)(F)C1(F)C(F)(F)C(F)(F)C(F)(F)C1(F)F	FC(F)(F)C1(F)C(F)(F)C(F)(F)C(F)(F)C1(F)F	C6F12	0	1892	9.3755	12.8063	177.044	-157.321	2.16229	0	0	-37.9764	0	0	1.25283	TRUE	1	0
229	Imidazolidine, 2-heptafluoropropyl-		CAS_RN: 31185-53-2	FC(F)(F)C(F)(F)C(F)(F)c1Nccn1	FC(F)(F)C(F)(F)C(F)(F)c1ncc[nH]1	C6H3F7N2	-0.7317	608.63	2.3811	11.711	189.379	637.535	1.96156	0	0	-10.8342	0	0	1.46878	FALSE	0	0
230	N-Methyl-bis-heptafluorobutyramide		CAS_RN: 73980-71-9	CN(C(=O)C(F)(F)C(F)(F)C(F)(F)F)C(=O)C(F)(F)C(F)(F)C(F)(F)F	CN(C(=O)C(F)(F)C(F)(F)C(F)(F)F)C(=O)C(F)(F)C(F)(F)C(F)(F)F	C9H3F14NO2	-3.1428	1402.56	4.72177	12.4018	207.661	475.37	2.66973	0	-4.09493	-33.7781	0	0	1.38298	FALSE	0	0
231	4,4,5,5,6,6,7,7,7-Nonafluoro-2-hydroxyheptyl 2-methylprop-2-enoate		CAS_RN: 36915-03-4	CC(=C)C(=O)OCC(O)CC(F)(F)C(F)(F)C(F)(F)C(F)(F)F	C=C(C)C(=O)OCC(O)CC(F)(F)C(F)(F)C(F)(F)C(F)(F)F	C11H11F9O3	-1.541	1055.68	3.96541	11.9906	181.377	823.173	2.7263	9.001	-1.20857	11.1846	-2.49093	0	1.18825	TRUE	1	0
232	TP_3169		NA	OC(F)(C(F)(F)C(F)(F)C(F)(F)F)C(F)(C(F)(F)F)C(F)(F)F	OC(F)(C(F)(F)C(F)(F)C(F)(F)F)C(F)(C(F)(F)F)C(F)(F)F	C7HF15O	1.1716	2193.94	9.83452	12.6219	199.683	10.1562	2.44366	7.9198	0	-23.8247	0	0	0.821895	TRUE	1	0
233	multiple H-substituted, multiple ether-substituted perfluoroalkyl alcohols, n=6, m=12		NA	FC(F)(F)C(F)(F)C(F)(F)C(F)(F)C(F)(F)C(F)(F)C(F)(F)C(F)(F)C(F)(F)C(F)(F)C(F)(F)C(F)(F)CCOCCOCCOCCOCCOCCOCCOCCOCCOCCOCCOCCO[H]	OCCOCCOCCOCCOCCOCCOCCOCCOCCOCCOCCOCCC(F)(F)C(F)(F)C(F)(F)C(F)(F)C(F)(F)C(F)(F)C(F)(F)C(F)(F)C(F)(F)C(F)(F)C(F)(F)C(F)(F)F	C36H49F25O12	-4.5251	3573.75	19.1782	13.3173	147.837	5656.12	3.47881	8.5597	0	-78.9524	-2.97809	0	2.63432	FALSE	0	0
234	double bond perfluoroalkyl (linear) sulfonic aicds, n=8		NA	F/C(C(F)(F)C(F)(F)C(F)(F)C(F)(F)C(F)(F)C(F)(F)C(F)(F)C(F)(F)S(=O)(O)=O)=C(F)C(F)(F)F	O=S(=O)(O)C(F)(F)C(F)(F)C(F)(F)C(F)(F)C(F)(F)C(F)(F)C(F)(F)C(F)(F)C(F)=C(F)C(F)(F)F	C11HF21O3S	0.6688	2687.15	11.8621	13.0563	240.311	83.4923	3.09689	7.8706	-5.44427	-123.454	0	1	0.842263	TRUE	1	0
235	1,2-Ethanediyl bis(perfluorobutanesulfonate)		CAS_RN: 92982-03-1	FC(F)(F)C(F)(F)C(F)(F)C(F)(F)S(=O)(=O)OCCOS(=O)(=O)C(F)(F)C(F)(F)C(F)(F)C(F)(F)F	O=S(=O)(OCCOS(=O)(=O)C(F)(F)C(F)(F)C(F)(F)C(F)(F)F)C(F)(F)C(F)(F)C(F)(F)C(F)(F)F	C10H4F18O6S2	-2.6502	2157	6.33639	12.8583	207.088	5.22881	3.24198	0	0	-46.754	-2.60333	0	1.33214	TRUE	1	0
236	Sulfonic acids, C6-8-alkane, perfluoro, compds. with polyethylene-polypropylene glycol bis(2-aminopropyl) ether		CAS_RN: 306974-45-8	CC(COCCOC(C)COCC(C)NS(=O)(=O)C(F)(F)C(F)(F)C(F)(F)C(F)(F)F)NS(=O)(=O)C(F)(F)C(F)(F)C(F)(F)C(F)(F)F	CC(COCCOC(C)COCC(C)NS(=O)(=O)C(F)(F)C(F)(F)C(F)(F)C(F)(F)F)NS(=O)(=O)C(F)(F)C(F)(F)C(F)(F)C(F)(F)F	C19H24F18N2O7S2	-1.9925	2343.3	4.36741	12.9477	166.129	3534.23	3.40798	0	0	-15.3862	-0.961838	0	1.87382	FALSE	0	0
237	double bond-perfluoroalkyl alcohols, n=1		NA	OC(F)(F)/C(F)=C(C(F)(F)F)F	OC(F)(F)C(F)=C(F)C(F)(F)F	C4HF7O	2.0964	435.17	0.333333	10.8642	167.125	-50.3558	1.58175	7.3137	-3.64352	-27.2522	0	0	1.57804	FALSE	0	0
238	Perfluorohexylchloride		CAS_RN: 355-41-9	FC(F)(F)C(F)(F)C(F)(F)C(F)(F)C(F)(F)C(F)(F)Cl	FC(F)(F)C(F)(F)C(F)(F)C(F)(F)C(F)(F)C(F)(F)Cl	C6ClF13	-1.1304	1308.34	7.47342	12.3324	237.999	-46.2116	2.39493	0	0	-76.815	0	0	1.20963	TRUE	1	0
239	(1Z)-2,2,3,3,4,4,4-Heptafluoro-N'-(2,2,3,3,4,4,4-heptafluorobutanimidoyl)butanimidamide		CAS_RN: 648-13-5	NC(=N/C(=N)C(F)(F)C(F)(F)C(F)(F)F)C(F)(F)C(F)(F)C(F)(F)F	N=C(N=C(N)C(F)(F)C(F)(F)C(F)(F)F)C(F)(F)C(F)(F)C(F)(F)F	C8H3F14N3	2.8036	1253.81	4.72177	12.2947	205.376	378.694	2.65853	0	-3.62039	-48.5944	0	0	1.2354	TRUE	1	0
240	Tridecafluorohexanesulphenyl chloride		CAS_RN: 89987-98-4	FC(F)(F)C(F)(F)C(F)(F)C(F)(F)C(F)(F)C(F)(F)SCl	FC(F)(F)C(F)(F)C(F)(F)C(F)(F)C(F)(F)C(F)(F)SCl	C6ClF13S	0.2793	1319.52	7.47342	12.3785	252.627	-93.896	2.52216	0	0	-80.1753	0	0	1.1981	TRUE	1	0
241	2-Propenoic acid, 2-methyl-, 2-[methyl[(nonafluorobutyl)sulfonyl]amino]ethyl ester		CAS_RN: 67584-59-2	C(N([S](=O)(=O)C(F)(F)C(F)(F)C(F)(F)C(F)(F)F)C)COC(=O)C(=C)C	C=C(C)C(=O)OCCN(C)S(=O)(=O)C(F)(F)C(F)(F)C(F)(F)C(F)(F)F	C11H12F9NO4S	-3.928	1257.37	3.96541	12.3203	175.524	583.4	2.81929	0	-1.0979	7.1153	-1.16569	0	1.52488	FALSE	0	0
242	Bis(heptadecafluorooctyl)phosphinic acid	8:8PFPiA	CAS_RN: 40143-79-1	C(C(C(C(C(F)(F)P(=O)(C(C(C(C(C(C(C(C(F)(F)F)(F)F)(F)F)(F)F)(F)F)(F)F)(F)F)(F)F)O)(F)F)(F)F)(F)F)(C(C(C(F)(F)F)(F)F)(F)F)(F)F	O=P(O)(C(F)(F)C(F)(F)C(F)(F)C(F)(F)C(F)(F)C(F)(F)C(F)(F)C(F)(F)F)C(F)(F)C(F)(F)C(F)(F)C(F)(F)C(F)(F)C(F)(F)C(F)(F)C(F)(F)F	C16HF34O2P	0.8728	4594.94	25.3299	13.629	239.743	154.322	3.43702	8.5503	0	-167.033	0	1	1.04389	TRUE	1	1
243	(Perfluoro-15-methylhexadecyl)ethyl methacrylate		CAS_RN: 94158-65-3	C(C(F)(F)C(F)(F)C(F)(F)C(F)(F)C(F)(F)C(F)(F)C(F)(F)C(F)(F)C(F)(F)C(F)(F)C(F)(F)C(F)(F)C(F)(F)C(F)(F)C(F)(C(F)(F)F)C(F)(F)F)COC(=O)C(C)=C	C=C(C)C(=O)OCCC(F)(F)C(F)(F)C(F)(F)C(F)(F)C(F)(F)C(F)(F)C(F)(F)C(F)(F)C(F)(F)C(F)(F)C(F)(F)C(F)(F)C(F)(F)C(F)(F)C(F)(C(F)(F)F)C(F)(F)F	C23H9F35O2	-0.9996	5417.19	29.9488	13.6906	228.799	1546.33	3.55913	0	-1.95764	-125.803	-3.35641	0	1.69458	FALSE	0	0
244	multiple H-substituted, multiple ether-substituted perfluoroalkyl alcohols, n=6, m=7		NA	FC(F)(F)C(F)(F)C(F)(F)C(F)(F)C(F)(F)C(F)(F)C(F)(F)C(F)(F)C(F)(F)C(F)(F)C(F)(F)C(F)(F)CCOCCOCCOCCOCCOCCOCCO[H]	OCCOCCOCCOCCOCCOCCOCCC(F)(F)C(F)(F)C(F)(F)C(F)(F)C(F)(F)C(F)(F)C(F)(F)C(F)(F)C(F)(F)C(F)(F)C(F)(F)C(F)(F)F	C26H29F25O7	-3.2547	3430	19.1782	13.2917	165.065	4675.62	3.4342	8.4975	0	-87.6309	-2.97001	0	2.18379	FALSE	0	0
245	1,1,1,2,2,3,3,4,4,5,5,6,6-Tridecafluoro-8-iodododecane		CAS_RN: 120695-82-1	CCCCC(I)CC(F)(F)C(F)(F)C(F)(F)C(F)(F)C(F)(F)C(F)(F)F	CCCCC(I)CC(F)(F)C(F)(F)C(F)(F)C(F)(F)C(F)(F)C(F)(F)F	C12H12F13I	-1.2914	1476.85	7.47342	12.4633	191.362	-2666.15	2.94239	0	0	4.9319	-1.99953	0	1.72024	FALSE	0	0
246	3,4,4,4-Tetrafluoro-1-phenyl-3-(trifluoromethyl)butan-1-one		CAS_RN: 82959-21-5	FC(F)(F)C(F)(CC(=O)c1ccccc1)C(F)(F)F	O=C(CC(F)(C(F)(F)F)C(F)(F)F)c1ccccc1	C11H7F7O	0	927.33	2.3811	11.7601	205.526	472.892	2.54131	0	-1.57153	79.9331	-2.32935	0	1.47394	FALSE	0	0
247	2-Propenoic acid, 2-[methyl[(pentadecafluoroheptyl)sulfonyl]amino]ethyl ester		CAS_RN: 68084-62-8	C(N([S](=O)(=O)C(F)(F)C(F)(F)C(F)(F)C(F)(F)C(F)(F)C(F)(F)C(F)(F)F)C)COC(=O)C=C	C=CC(=O)OCCN(C)S(=O)(=O)C(F)(F)C(F)(F)C(F)(F)C(F)(F)C(F)(F)C(F)(F)C(F)(F)F	C13H10F15NO4S	-3.1063	2112.23	9.33326	12.8569	191.797	801.882	3.1551	0	-1.3429	-44.7917	-1.50573	0	1.27783	TRUE	1	0
248	N-[[4-[(Heptadecafluorononenyl)oxy]phenyl]sulfonyl]-N-methylglycine sodium salt		CAS_RN: 85228-95-1	[Na+].CN(CC([O-])=O)S(=O)(=O)C1=CC=C(OC(F)=C(F)C(F)(F)C(F)(F)C(F)(F)C(F)(F)C(F)(F)C(F)(F)C(F)(F)F)C=C1	CN(CC(=O)O)S(=O)(=O)c1ccc(OC(F)=C(F)C(F)(F)C(F)(F)C(F)(F)C(F)(F)C(F)(F)C(F)(F)C(F)(F)F)cc1	C18H10F17NO5S	-0.6862	2324.32	9.33326	12.9563	218.65	-569.094	3.40758	8.6112	-4.5817	-9.0192	-1.06321	1	0.836017	TRUE	1	0
249	2,4,6-Tris(pentadecafluoroheptyl)-1,3,5-triazine		CAS_RN: 21674-38-4	FC(F)(F)C(F)(F)C(F)(F)C(F)(F)C(F)(F)C(F)(F)C(F)(F)C1=NC(=NC(=N1)C(F)(F)C(F)(F)C(F)(F)C(F)(F)C(F)(F)C(F)(F)C(F)(F)F)C(F)(F)C(F)(F)C(F)(F)C(F)(F)C(F)(F)C(F)(F)C(F)(F)F	FC(F)(F)C(F)(F)C(F)(F)C(F)(F)C(F)(F)C(F)(F)C(F)(F)c1nc(C(F)(F)C(F)(F)C(F)(F)C(F)(F)C(F)(F)C(F)(F)C(F)(F)F)nc(C(F)(F)C(F)(F)C(F)(F)C(F)(F)C(F)(F)C(F)(F)C(F)(F)F)n1	C24F45N3	-0.9866	5333.25	0	13.8615	257.154	162.496	3.71369	0	0	-222.156	0	0	1.66539	FALSE	0	0
250	Tetrafluoroethylene		CAS_RN: 116-14-3	C(=C(F)F)(F)F	FC(F)=C(F)F	C2F4	-4.7029	0	0	8.6058	0	21.6995	1.26447	0	-2.90741	-25.3176	0	0	3.61508	FALSE	0	0
251	1H,1H,11H,11H-Perfluorotetraethylene glycol		CAS_RN: 330562-44-2	OCC(F)(F)OC(F)(F)C(F)(F)OC(F)(F)C(F)(F)OC(F)(F)CO	OCC(F)(F)OC(F)(F)C(F)(F)OC(F)(F)C(F)(F)OC(F)(F)CO	C8H6F12O5	-2.1315	1057.81	4.91315	12.0821	195.127	341.022	2.64447	7.8505	0	-17.2941	-2.6557	0	1.16787	TRUE	1	0
252	3,3,4,4,5,5,6,6,6-Nonafluorohexyl 2,2-difluoro-3-hydroxy-4-methylpentanoate		CAS_RN: 1370345-78-0	CC(C)C(O)C(F)(F)C(=O)OCCC(F)(F)C(F)(F)C(F)(F)C(F)(F)F	CC(C)C(O)C(F)(F)C(=O)OCCC(F)(F)C(F)(F)C(F)(F)C(F)(F)F	C12H13F11O3	-1.4828	1188.42	3.71151	12.1662	154.186	1645.26	2.79394	9.0661	-2.63852	2.8612	-2.60589	0	1.39765	FALSE	0	0
253	((Perfluorooctyl)ethyl)di(propan-2-yl)silane		CAS_RN: 356056-15-0	CC(C)[SiH](CCC(F)(F)C(F)(F)C(F)(F)C(F)(F)C(F)(F)C(F)(F)C(F)(F)C(F)(F)F)C(C)C	CC(C)[SiH](CCC(F)(F)C(F)(F)C(F)(F)C(F)(F)C(F)(F)C(F)(F)C(F)(F)C(F)(F)F)C(C)C	C16H19F17Si	4.1353	2128.55	11.2406	12.8495	155.998	910.781	3.1126	0	0	43.2469	-2.26389	0	1.61233	FALSE	0	0
254	N-Ethyl-N-[3-(trimethoxysilyl)propyl]perfluorooctanesulfonamide		CAS_RN: 61660-12-6	CCN(CCC[Si](OC)(OC)OC)S(=O)(=O)C(F)(F)C(F)(F)C(F)(F)C(F)(F)C(F)(F)C(F)(F)C(F)(F)C(F)(F)F	CCN(CCC[Si](OC)(OC)OC)S(=O)(=O)C(F)(F)C(F)(F)C(F)(F)C(F)(F)C(F)(F)C(F)(F)C(F)(F)C(F)(F)F	C16H20F17NO5SSi	-2.6687	2509.27	11.2406	13.0595	169.617	775.396	3.24888	0	0	-9.8829	-1.25338	0	1.40383	FALSE	0	0
255	4-[(Heptadecafluorooctyl)oxy]benzene-1-sulfonamide		CAS_RN: 89932-76-3	NS(=O)(=O)C1=CC=C(OC(F)(F)C(F)(F)C(F)(F)C(F)(F)C(F)(F)C(F)(F)C(F)(F)C(F)(F)F)C=C1	NS(=O)(=O)c1ccc(OC(F)(F)C(F)(F)C(F)(F)C(F)(F)C(F)(F)C(F)(F)C(F)(F)C(F)(F)F)cc1	C14H6F17NO3S	1.4621	2185.9	11.2406	12.9319	213.293	406.977	3.16643	0	0	-3.8665	0	0	1.14414	TRUE	1	0
256	Pentafluorosulfide Perfluoroalkyl (linear) carboxylic acids, n=8		NA	FC([S](F)(F)(F)(F)F)(C(F)(F)C(F)(F)C(F)(F)C(F)(F)C(F)(F)C(F)(F)C(F)(F)C(O)=O)F	O=C(O)C(F)(F)C(F)(F)C(F)(F)C(F)(F)C(F)(F)C(F)(F)C(F)(F)C(F)(F)S(F)(F)(F)(F)F	C9HF21O2S	-0.2883	2706.23	11.2406	13.2189	233.445	76.9981	2.89052	7.5868	-4.56936	-86.658	0	1	0.676233	TRUE	1	0
257	Methyl 3,4,5-tris[1,1,2-trifluoro-2-(heptafluoropropoxy)ethoxy]benzoate		CAS_RN: 1233312-86-1	COC(=O)c1cc(OC(F)(F)C(F)OC(F)(F)C(F)(F)C(F)(F)F)c(OC(F)(F)C(F)OC(F)(F)C(F)(F)C(F)(F)F)c(OC(F)(F)C(F)OC(F)(F)C(F)(F)C(F)(F)F)c1	COC(=O)c1cc(OC(F)(F)C(F)OC(F)(F)C(F)(F)C(F)(F)F)c(OC(F)(F)C(F)OC(F)(F)C(F)(F)C(F)(F)F)c(OC(F)(F)C(F)OC(F)(F)C(F)(F)C(F)(F)F)c1	C23H8F30O8	-3.3241	2505.15	9.3046	13.1381	239.678	547.782	3.56552	0	-2.44984	30.6342	0	0	1.41566	FALSE	0	0
258	1,3-Diethyl-2-methyl-5-[(perfluorohexyl)sulfonyl]-1H-benzimidazolium 4-methylbenzenesulfonate		CAS_RN: 76848-68-5	CC1=CC=C(C=C1)S(O)(=O)=O.CCN1C(C)[NH+](CC)C2=C1C=CC(=C2)S(=O)(=O)C(F)(F)C(F)(F)C(F)(F)C(F)(F)C(F)(F)C(F)(F)F	CCN1c2ccc(S(=O)(=O)C(F)(F)C(F)(F)C(F)(F)C(F)(F)C(F)(F)C(F)(F)F)cc2N(CC)C1C	C18H17F13N2O2S	-1.0219	1880.53	7.47342	13.0281	177.196	2823.25	3.15196	0	0	12.1607	0.111241	0	1.64314	FALSE	0	0
259	3-Fluoro-4-{(E)-[4'-(heptafluoropropyl)[1,1'-biphenyl]-4-yl]diazenyl}phenol		CAS_RN: 113448-90-1	Oc1ccc(N=Nc2ccc(cc2)-c2ccc(cc2)C(F)(F)C(F)(F)C(F)(F)F)c(F)c1	Oc1ccc(N=Nc2ccc(-c3ccc(C(F)(F)C(F)(F)C(F)(F)F)cc3)cc2)c(F)c1	C21H12F8N2O	1.9162	873.42	2.3811	12.2826	204.433	768.755	3.0466	9.1576	0	47.0897	0	0	1.14726	TRUE	1	0
260	H-substituted Perfluoroalkyl (linear) carboxylic acids_i, n=11		NA	C(O)(=O)C(F)C(F)(F)C(F)(F)C(F)(F)C(F)(F)C(F)(F)C(F)(F)C(F)(F)C(F)(F)C(F)(F)C(F)(F)C(F)(F)F	O=C(O)C(F)C(F)(F)C(F)(F)C(F)(F)C(F)(F)C(F)(F)C(F)(F)C(F)(F)C(F)(F)C(F)(F)C(F)(F)C(F)(F)F	C13H2F24O2	0.7315	3214.44	17.1586	13.2121	233.182	96.4058	3.14759	7.7502	-3.99085	-142.047	0	1	0.670776	TRUE	1	0
261	2-Chloro-6-ethyl-4-(1,1,1,2,3,3,3-heptafluoropropan-2-yl)aniline		CAS_RN: 1630969-89-9	CCc1cc(cc(Cl)c1N)C(F)(C(F)(F)F)C(F)(F)F	CCc1cc(C(F)(C(F)(F)F)C(F)(F)F)cc(Cl)c1N	C11H9ClF7N	2.9147	914.38	2.3811	12.0893	173.477	805.489	2.73836	0	0	84.6195	0.115764	0	1.61785	FALSE	0	0
262	Perfluorooctanesulfonyl fluoride		CAS_RN: 307-35-7	O=[S](C(C(C(C(C(C(C(C(F)(F)F)(F)F)(F)F)(F)F)(F)F)(F)F)(F)F)(F)F)(=O)F	O=S(=O)(F)C(F)(F)C(F)(F)C(F)(F)C(F)(F)C(F)(F)C(F)(F)C(F)(F)C(F)(F)F	C8F18O2S	-1.4579	2265.34	11.2406	12.8772	240.55	-24.2735	2.77944	0	0	-113.308	0	0	1.15642	TRUE	1	0
263	2,2,3,3,4,4,4-Heptafluorobutyl methanesulfonate		CAS_RN: 755-88-4	CS(=O)(=O)OCC(F)(F)C(F)(F)C(F)(F)F	CS(=O)(=O)OCC(F)(F)C(F)(F)C(F)(F)F	C5H5F7O3S	-3.7127	576.97	2.3811	11.5187	169.18	-732.549	2.19096	0	0	-4.1813	-2.51913	0	1.81007	FALSE	0	0
264	ketone perfluoroalkyl (linear) carboxylic acids_i, n=4		NA	FC(=O)C(F)(F)C(F)(F)C(F)(F)C(F)(F)S(=O)(O)=O	O=C(F)C(F)(F)C(F)(F)C(F)(F)C(F)(F)S(=O)(=O)O	C5HF9O4S	1.2452	1207.34	3.96541	12.2042	225.054	98.699	2.3678	7.7822	-4.38325	-69.3259	0	1	0.810519	TRUE	1	0
265	Perfluoro(2,7-dimethyl-3,6-dioxasuberoyl) fluoride		CAS_RN: 1644-10-6	FC(=O)C(F)(OC(F)(F)C(F)(F)OC(F)(C(F)=O)C(F)(F)F)C(F)(F)F	O=C(F)C(F)(OC(F)(F)C(F)(F)OC(F)(C(=O)F)C(F)(F)F)C(F)(F)F	C8F14O4	-3.1922	1242.88	5.26933	12.3127	231.355	26.4067	2.81677	0	-4.52373	-29.9907	0	0	1.43004	FALSE	0	0
266	1,2-Dichloroperfluorocyclohexene		CAS_RN: 336-19-6	FC1(F)C(Cl)=C(Cl)C(F)(F)C(F)(F)C1(F)F	FC1(F)C(Cl)=C(Cl)C(F)(F)C(F)(F)C1(F)F	C6Cl2F8	0	694.82	3.96541	12.3037	237.875	-39.6466	2.39813	0	-1.49203	-32.2311	0	0	1.20582	TRUE	1	0
267	[3-[[(heptadecafluorooctyl)sulphonyl]amino]propyl]trimethylammonium chloride		CAS_RN: 38006-74-5	[Cl-].C[N+](C)(C)CCCNS(=O)(=O)C(F)(F)C(F)(F)C(F)(F)C(F)(F)C(F)(F)C(F)(F)C(F)(F)C(F)(F)F	C[N+](C)(C)CCCNS(=O)(=O)C(F)(F)C(F)(F)C(F)(F)C(F)(F)C(F)(F)C(F)(F)C(F)(F)C(F)(F)F	C14H16F17N2O2S	-2.7741	2366.85	11.2406	12.9559	178.852	2554.7	3.12176	0	0	-40.8944	-1.2005	0	1.58445	FALSE	0	0
268	N-ethyl perfluoroheptanesulfonamido polyethylene glycol, n=7, m=7		NA	OCCOCCOCCOCCOCCOCCOCCOCCN(CC)S(=O)(=O)C(F)(F)C(F)(F)C(F)(F)C(F)(F)C(F)(F)C(F)(F)C(F)(F)F	CCN(CCOCCOCCOCCOCCOCCOCCOCCO)S(=O)(=O)C(F)(F)C(F)(F)C(F)(F)C(F)(F)C(F)(F)C(F)(F)C(F)(F)F	C25H38F15NO10S	-4.6776	2268.16	9.33326	12.9142	143.278	4033.47	3.39822	8.5338	0	-33.4225	-1.31089	0	2.1053	FALSE	0	0
269	mono(Perfluorobutyl) maleate		CAS_RN: 229957-05-5	[H]C(=C(/[H])C(=O)OC(F)(F)C(F)(F)C(F)(F)C(F)(F)F)C([O-])=O	O=C(O)C=CC(=O)OC(F)(F)C(F)(F)C(F)(F)C(F)(F)F	C8H3F9O4	-0.3741	1003.79	3.96541	11.9422	220.934	372.718	2.44384	7.9575	-2.5694	-2.0962	0	1	0.814059	TRUE	1	0
270	N-ethyl perfluoropentanesulfonamido polyethylene glycol, n=5, m=3		NA	OCCOCCOCCOCCN(CC)S(=O)(=O)C(F)(F)C(F)(F)C(F)(F)C(F)(F)C(F)(F)F	CCN(CCOCCOCCOCCO)S(=O)(=O)C(F)(F)C(F)(F)C(F)(F)C(F)(F)C(F)(F)F	C15H22F11NO6S	-3.8978	1558.03	5.67624	12.5573	148.453	2709.96	3.19636	8.4571	0	-16.1576	-1.09552	0	1.71198	FALSE	0	0
271	Butan-2-yl N-(2,2,3,3,4,4,4-heptafluorobutanoyl)-D-alaninate		CAS_RN: 93080-42-3	CCC(C)OC(=O)[C@@H](C)NC(=O)C(F)(F)C(F)(F)C(F)(F)F	CCC(C)OC(=O)[C@@H](C)NC(=O)C(F)(F)C(F)(F)C(F)(F)F	C11H14F7NO3	-3.2002	822.13	2.3811	11.7966	165.881	1660.97	2.70878	0	-2.92738	8.5382	0.341975	0	1.70576	FALSE	0	0
272	Perfluoro-2-methyl-3-ethylpentane		CAS_RN: 354-97-2	FC(F)(F)C(F)(F)C(F)(C(F)(F)C(F)(F)F)C(F)(C(F)(F)F)C(F)(F)F	FC(F)(F)C(F)(F)C(F)(C(F)(F)C(F)(F)F)C(F)(C(F)(F)F)C(F)(F)F	C8F18	-1.0143	2243.81	13.1014	12.9121	217.37	-39.2902	2.65965	0	0	-14.3816	0	0	1.15461	TRUE	1	0
273	H-substituted Perfluoroalkyl (linear) dicarboxylic acids, n=11		NA	FC(F)(C(F)(F)C(F)(F)C(F)(F)C(F)(F)C(F)(F)C(F)(F)C(F)(F)C(F)(F)C(F)(F)C(F)(F)C(O)=O)C(F)C(O)=O	O=C(O)C(F)C(F)(F)C(F)(F)C(F)(F)C(F)(F)C(F)(F)C(F)(F)C(F)(F)C(F)(F)C(F)(F)C(F)(F)C(F)(F)C(=O)O	C14H3F23O4	1.9653	3346.69	17.1586	13.2609	232.133	175.617	3.20192	7.7745	-4.65255	-161.279	0	2	0.986207	TRUE	1	0
274	[N(E),S(S)]-N-(4-methylphenyl)methyleneperfluorobutanesulfinamide		CAS_RN: 1612778-39-8	[H]C(=N/[S@@](=O)C(F)(F)C(F)(F)C(F)(F)C(F)(F)F)C1=CC=C(C)C=C1	Cc1ccc(C=N[S@@](=O)C(F)(F)C(F)(F)C(F)(F)C(F)(F)F)cc1	C12H8F9NOS	-0.7943	994.85	3.96541	12.1237	201.835	1064.68	2.69348	0	0	28.0775	0	0	1.37489	FALSE	0	0
275	Perfluoropentadecanoic acid (PFPeDA)		CAS_RN: 141074-63-7	FC(C(F)(C(O)=O)F)(C(F)(C(F)(C(F)(C(F)(C(F)(C(F)(C(F)(C(F)(F)C(F)(F)C(F)(F)C(F)(F)C(F)(F)F)F)F)F)F)F)F)F)F	O=C(O)C(F)(F)C(F)(F)C(F)(F)C(F)(F)C(F)(F)C(F)(F)C(F)(F)C(F)(F)C(F)(F)C(F)(F)C(F)(F)C(F)(F)C(F)(F)C(F)(F)F	C15HF29O2	0.7132	3935.88	23.2671	13.4484	238.937	96.4904	3.3	7.6467	-4.76795	-177.665	0	1	1.0187	TRUE	1	0
276	2-Fluoro-4-(nonafluorobutyl)aniline		CAS_RN: 821791-47-3	NC1=C(F)C=C(C=C1)C(F)(F)C(F)(F)C(F)(F)C(F)(F)F	Nc1ccc(C(F)(F)C(F)(F)C(F)(F)C(F)(F)F)cc1F	C10H5F10N	3.4981	970.17	3.96541	12.1882	198.598	640.13	2.59765	0	0	9.2045	0	0	1.40485	FALSE	0	0
277	1,1,1,2,3,3,3-Heptafluoro-2-((trifluorovinyl)oxy)propane		CAS_RN: 10372-98-2	FC(F)=C(F)OC(F)(C(F)(F)F)C(F)(F)F	FC(F)=C(F)OC(F)(C(F)(F)F)C(F)(F)F	C5F10O	-3.5315	777.5	2.3811	11.5895	230.812	9.42334	1.58175	0	-3.65692	-17.8344	0	0	1.65733	FALSE	0	0
278	(2E)-1,1,2,3,4,5,5,5-Octafluoro-1-iodo-4-(trifluoromethyl)-2-pentene		CAS_RN: 120695-78-5	FC(=C(F)C(F)(C(F)(F)F)C(F)(F)F)C(F)(F)I	FC(=C(F)C(F)(C(F)(F)F)C(F)(F)F)C(F)(F)I	C6F11I	-0.8414	1294.61	2.80397	11.944	282.169	-275.799	2.26924	0	-4.20757	-30.5797	0	0	1.52164	FALSE	0	0
279	1,1,2,3,4,5,5,5-Octafluoro-1-iodo-4-(trifluoromethyl)-2-pentene		CAS_RN: 96288-51-6	FC(=C(F)C(F)(C(F)(F)F)C(F)(F)F)C(F)(F)I	FC(=C(F)C(F)(C(F)(F)F)C(F)(F)F)C(F)(F)I	C6F11I	-0.8414	1294.61	2.80397	11.944	282.169	-275.799	2.26924	0	-4.20757	-30.5797	0	0	1.52164	FALSE	0	0
280	Ethanesulfonic acid, 1,1,2,2-tetrafluoro-2-((trifluoroethenyl)oxy)-, polymer with tetrafluoroethene		CAS_RN: 111173-25-2	FC(F)=C(F)F.OS(=O)(=O)C(F)(F)C(F)(F)OC(F)=C(F)F	O=S(=O)(O)C(F)(F)C(F)(F)OC(F)=C(F)F	C4HF7O4S	-0.3748	621.21	1	11.535	229.107	195.41	1.8131	7.8169	-3.49205	-29.8471	0	1	1.09435	TRUE	1	0
281	1-Pentanesulfonamide, 1,1,2,2,3,3,4,4,5,5,5-undecafluoro-N-methyl-		CAS_RN: 68298-13-5	CN[S](=O)(=O)C(F)(F)C(F)(F)C(F)(F)C(F)(F)C(F)(F)F	CNS(=O)(=O)C(F)(F)C(F)(F)C(F)(F)C(F)(F)C(F)(F)F	C6H4F11NO2S	-0.722	1375.28	5.67624	12.3785	200.964	185.065	2.56135	0	0	-46.6888	0	0	1.19258	TRUE	1	0
282	(2E)-3,4,4,5,5,6,6,7,7,8,8,8-Dodecafluoro-2-octenoic acid		CAS_RN: 883107-53-7	FC(F)(C(/F)=CC(O)=O)C(F)(F)C(F)(F)C(F)(F)C(F)(F)F	O=C(O)C=C(F)C(F)(F)C(F)(F)C(F)(F)C(F)(F)C(F)(F)F	C8H2F12O2	1.2002	1357.73	5.67624	12.2847	224.248	122.444	2.49877	7.7946	-3.84477	-52.3541	0	1	0.689553	TRUE	1	0
283	3-(Perfluoro-3-methylbutyl)-1,2-propenoxide		CAS_RN: 54009-81-3	FC(F)(F)C(F)(C(F)(F)F)C(F)(F)C(F)(F)CC1CO1	FC(F)(F)C(F)(C(F)(F)F)C(F)(F)C(F)(F)CC1CO1	C8H5F11O	-1.511	1755.25	6.08364	12.3614	189.294	594.957	2.19299	0	0	12.8188	-2.15493	0	1.36964	FALSE	0	0
284	Sodium 2,3,3,3-tetrafluoro-2-(heptafluoropropoxy)propanoate		CAS_RN: 67963-75-1	[Na+].[O-]C(=O)C(F)(OC(F)(F)C(F)(F)C(F)(F)F)C(F)(F)F	O=C(O)C(F)(OC(F)(F)C(F)(F)C(F)(F)F)C(F)(F)F	C6HF11O3	-0.1826	1048.88	4.5088	12.0508	225.844	101.284	2.36147	7.7205	-3.88644	-16.9093	0	1	0.850589	TRUE	1	0
285	2,2-difluoro-2-[1,1,2,2-tetrafluoro-2-(trifluoromethoxy)ethoxy]acetyl Chloride		CAS_RN: 261503-81-5	FC(F)(F)OC(F)(F)C(F)(F)OC(F)(F)C(Cl)=O	O=C(Cl)C(F)(F)OC(F)(F)C(F)(F)OC(F)(F)F	C5ClF9O3	-4.3121	777.93	2.52506	11.607	231.064	43.0141	2.13438	0	-2.24847	8.2147	0	0	1.64368	FALSE	0	0
286	4-(Undecafluoropentyl)cyclohexane-1-carboxylic acid		CAS_RN: 88951-26-2	OC(=O)C1CCC(CC1)C(F)(F)C(F)(F)C(F)(F)C(F)(F)C(F)(F)F	O=C(O)C1CCC(C(F)(F)C(F)(F)C(F)(F)C(F)(F)C(F)(F)F)CC1	C12H11F11O2	1.2833	1341.53	5.67624	12.4287	157.757	2322.92	2.75013	8.6328	-1.45605	36.0067	-1.04839	1	1.28542	TRUE	1	0
287	2,2,2-Trifluoroethyl 4,4,5,5,6,6,7,7,8,8,9,9,10,10,11,11,11-heptadecafluoroundecanoate		CAS_RN: 344580-04-7	FC(F)(F)COC(=O)CCC(F)(F)C(F)(F)C(F)(F)C(F)(F)C(F)(F)C(F)(F)C(F)(F)C(F)(F)F	O=C(CCC(F)(F)C(F)(F)C(F)(F)C(F)(F)C(F)(F)C(F)(F)C(F)(F)C(F)(F)F)OCC(F)(F)F	C13H6F20O2	-1.7939	2136.75	10.807	12.8405	209.694	647.359	3.15556	0	-2.53282	-45.2185	-3.20532	0	1.26382	TRUE	1	0
288	n:2 perfluoroalkyl acrylates, n=10		NA	FC(F)(F)C(F)(F)C(F)(F)C(F)(F)C(F)(F)C(F)(F)C(F)(F)C(F)(F)C(F)(F)C(F)(F)CCOC(CC(C)=C)=O	C=C(C)CC(=O)OCCC(F)(F)C(F)(F)C(F)(F)C(F)(F)C(F)(F)C(F)(F)C(F)(F)C(F)(F)C(F)(F)C(F)(F)F	C17H11F21O2	-1.5935	2774	15.1596	13.0766	204.76	1533.61	3.22203	0	-1.60306	-61.7572	-2.99841	0	1.31243	TRUE	1	0
289	multiple H-substituted, multiple ether-substituted perfluoroalkyl alcohols, n=3, m=19		NA	FC(F)(F)C(F)(F)C(F)(F)C(F)(F)C(F)(F)C(F)(F)CCOCCOCCOCCOCCOCCOCCOCCOCCOCCOCCOCCOCCOCCOCCOCCOCCOCCOCCO[H]	OCCOCCOCCOCCOCCOCCOCCOCCOCCOCCOCCOCCOCCOCCOCCOCCOCCOCCOCCC(F)(F)C(F)(F)C(F)(F)C(F)(F)C(F)(F)C(F)(F)F	C44H77F13O19	-6.4697	1989.63	7.47342	12.6125	120.687	2789.56	3.46417	8.5932	0	-24.1043	-2.43502	0	2.19388	FALSE	0	0
290	Trifluoro(trifluoromethoxy)ethylene		CAS_RN: 1187-93-5	C(=C(F)F)(OC(F)(F)F)F	FC(F)=C(F)OC(F)(F)F	C3F6O	-5.9527	252	0	10.0737	177.044	-14.3337	1.58175	0	-3.14137	1.1921	0	0	2.28381	FALSE	0	0
291	1,1,1,2,2,3,3,4,4,5,5,6,6,7,7,8,8,9,9,10,10-Henicosafluoro-12-iodohexadecane		CAS_RN: 129838-38-6	CCCCC(I)CC(F)(F)C(F)(F)C(F)(F)C(F)(F)C(F)(F)C(F)(F)C(F)(F)C(F)(F)C(F)(F)C(F)(F)F	CCCCC(I)CC(F)(F)C(F)(F)C(F)(F)C(F)(F)C(F)(F)C(F)(F)C(F)(F)C(F)(F)C(F)(F)C(F)(F)F	C16H12F21I	-0.8404	2667.1	15.1596	13.0772	208.618	-2531.82	3.34478	0	0	-38.0292	-2.41976	0	1.61922	FALSE	0	0
292	2-Bromo-3-(bromomethyl)-4,4,5,5,6,6,6-heptafluorohexan-3-ol		CAS_RN: 93339-87-8	CC(Br)C(O)(CBr)C(F)(F)C(F)(F)C(F)(F)F	CC(Br)C(O)(CBr)C(F)(F)C(F)(F)C(F)(F)F	C7H7Br2F7O	0.5379	752.45	3.96541	11.9753	162.149	-2544.28	2.58838	9.5109	0	28.2683	-0.635	0	1.66436	FALSE	0	0
293	perfluoroalkanesulfonamido quaternary ammonium triol, n=6		NA	S(NC(CO)CC[N+](CC(O)CO)(C)C)(=O)(=O)C(F)(F)C(F)(F)C(F)(F)C(F)(F)C(F)(F)C(F)(F)F	C[N+](C)(CCC(CO)NS(=O)(=O)C(F)(F)C(F)(F)C(F)(F)C(F)(F)C(F)(F)C(F)(F)F)CC(O)CO	C15H22F13N2O5S	-0.5965	1917.07	7.47342	12.7585	156.145	2809.67	3.19349	9.3903	0	-6.2403	-1.46085	0	1.48713	FALSE	0	0
294	double bond-perfluoroalkyl alcohols, n=0		NA	O/C(F)=C(C(F)(F)F)F	OC(F)=C(F)C(F)(F)F	C3HF5O	2.4112	345.25	0	10.1732	74.1835	5.86651	1.58175	7.2745	-3.1088	-17.1441	0	0	2.36781	FALSE	0	0
295	4,4,5,5,6,6,7,7,8,8,9,9,10,10,11,11,11-heptadecafluoro-1-phenylundecane-1,3-dione		CAS_RN: 141522-69-2	FC(F)(F)C(F)(F)C(F)(F)C(F)(F)C(F)(F)C(F)(F)C(F)(F)C(F)(F)C(=O)CC(=O)C1=CC=CC=C1	O=C(CC(=O)C(F)(F)C(F)(F)C(F)(F)C(F)(F)C(F)(F)C(F)(F)C(F)(F)C(F)(F)F)c1ccccc1	C17H7F17O2	0	2276.38	11.2406	12.9217	220.096	1541.13	3.14403	0	-3.64581	-3.5768	-2.47921	0	1.27526	TRUE	1	0
296	Morpholine, 2,2,3,3,5,5,6,6-octafluoro-4-(pentafluoroethyl)-		CAS_RN: 55716-11-5	FC(F)(F)C(F)(F)N1C(F)(F)C(F)(F)OC(F)(F)C1(F)F	FC(F)(F)C(F)(F)N1C(F)(F)C(F)(F)OC(F)(F)C1(F)F	C6F13NO	-3.784	1291.5	6.67872	12.5925	204.627	-16.4959	2.53601	0	0	-9.5443	0	0	1.44658	FALSE	0	0
297	N-(2-hydroxyethyl)-N-methylperfluoro-2-methylpropanesulfonamide		CAS_RN: 93762-11-9	CN(CCO)S(=O)(=O)C(F)(F)C(F)(C(F)(F)F)C(F)(F)F	CN(CCO)S(=O)(=O)C(F)(F)C(F)(C(F)(F)F)C(F)(F)F	C7H8F9NO3S	-2.0021	1720.15	4.24264	12.3463	162.887	108.684	2.69083	8.3228	0	23.4471	-1.19436	0	1.22792	TRUE	1	0
298	N-(2-Methylsulfinyl-1,1-dimethyl-ethyl)-N'-{2-methyl-4-[perfluoroisopropyl]phenyl}phthalamide		CAS_RN: 371771-07-2	Cc1cc(ccc1NC(=O)c1ccccc1C(=O)NC(C)(C)CS(C)=O)C(F)(C(F)(F)F)C(F)(F)F	Cc1cc(C(F)(C(F)(F)F)C(F)(F)F)ccc1NC(=O)c1ccccc1C(=O)NC(C)(C)CS(C)=O	C23H23F7N2O3S	1.5087	1256.47	1.56562	12.4825	182.749	-44.3961	3.21821	0	-0.870406	94.2399	0.327055	0	1.49856	FALSE	0	0
299	(1r,4r)-4-(Heptafluoropropyl)cyclohexane-1-carboxamide		CAS_RN: 88951-19-3	NC(=O)[C@H]1CC[C@@H](CC1)C(F)(F)C(F)(F)C(F)(F)F	NC(=O)[C@H]1CC[C@H](C(F)(F)C(F)(F)C(F)(F)F)CC1	C10H12F7NO	2.3149	736.97	2.3811	11.8705	129.261	1411.93	2.57583	0	-0.759863	47.7989	-0.590995	0	1.79309	FALSE	0	0
300	(1s,4s)-4-(Heptafluoropropyl)cyclohexane-1-carboxamide		CAS_RN: 88951-18-2	NC(=O)[C@H]1CC[C@H](CC1)C(F)(F)C(F)(F)C(F)(F)F	NC(=O)[C@H]1CC[C@@H](C(F)(F)C(F)(F)C(F)(F)F)CC1	C10H12F7NO	2.3149	736.97	2.3811	11.8705	129.261	1411.93	2.57583	0	-0.759863	47.7989	-0.590995	0	1.79309	FALSE	0	0
301	Methyl 2,3,4,4,5,5,6,6,6-nonafluorohex-2-enoate		CAS_RN: 88022-46-2	COC(=O)C(F)=C(F)C(F)(F)C(F)(F)C(F)(F)F	COC(=O)C(F)=C(F)C(F)(F)C(F)(F)C(F)(F)F	C7H3F9O2	-3.4014	899.96	2.3811	11.7758	215.546	330.412	2.40182	0	-3.86419	-36.6215	0	0	1.50165	FALSE	0	0
302	Rhodium(II) perfluorobutyrate dimer		CAS_RN: 73755-28-9	[Rh++].[Rh++].[O-]C(=O)C(F)(F)C(F)(F)C(F)(F)F.[O-]C(=O)C(F)(F)C(F)(F)C(F)(F)F.[O-]C(=O)C(F)(F)C(F)(F)C(F)(F)F.[O-]C(=O)C(F)(F)C(F)(F)C(F)(F)F	O=C(O)C(F)(F)C(F)(F)C(F)(F)F	C4HF7O2	1.9028	665.5	2.3811	11.4497	159.721	105.806	1.58175	7.4102	-3.53257	-27.9449	0	1	1.35047	TRUE	1	0
303	2,4,6-Tris(1,1,1,2,3,3,3-heptafluoropropan-2-yl)-1,3,5-triazine		CAS_RN: 10271-37-1	FC(F)(F)C(F)(c1nc(nc(n1)C(F)(C(F)(F)F)C(F)(F)F)C(F)(C(F)(F)F)C(F)(F)F)C(F)(F)F	FC(F)(F)C(F)(c1nc(C(F)(C(F)(F)F)C(F)(F)F)nc(C(F)(C(F)(F)F)C(F)(F)F)n1)C(F)(F)F	C12F21N3	-1.9335	2712.94	9.74252	12.9935	303.677	-69.6705	3.21821	0	0	49.4907	0	0	1.65543	FALSE	0	0
304	double bond-, ether-substituted perfluoroalkyl (linear) carboyxlic acids, n=4		NA	FC(F)(F)/C(F)=C(F)/C(F)(F)C(F)(F)C(F)(F)C(F)(F)OC(F)(F)C(O)=O	O=C(O)C(F)(F)OC(F)(F)C(F)(F)C(F)(F)C(F)(F)/C(F)=C(\F)C(F)(F)F	C9HF15O3	0.1124	1551.5	5.43135	12.4326	239.454	60.3872	2.71656	7.6526	-4.98568	-68.7973	0	1	0.826424	TRUE	1	0
305	2-[(acryloyloxy)methyl]-2-[[[bis[3-(acryloyloxy)-2,2-bis[(acryloyloxy)methyl]propoxy](3,3,4,4,5,5,6,6,7,7,8,8,8-tridecafluorooctyl)silyl]oxy]methyl]propane-1,3-diyl diacrylate		CAS_RN: 94237-13-5	O=C(OCC(COC(=O)C=C)(COC(=O)C=C)CO[Si](OCC(COC(=O)C=C)(COC(=O)C=C)COC(=O)C=C)(OCC(COC(=O)C=C)(COC(=O)C=C)COC(=O)C=C)CCC(F)(F)C(F)(F)C(F)(F)C(F)(F)C(F)(F)C(F)(F)F)C=C	C=CC(=O)OCC(COC(=O)C=C)(COC(=O)C=C)CO[Si](CCC(F)(F)C(F)(F)C(F)(F)C(F)(F)C(F)(F)C(F)(F)F)(OCC(COC(=O)C=C)(COC(=O)C=C)COC(=O)C=C)OCC(COC(=O)C=C)(COC(=O)C=C)COC(=O)C=C	C50H55F13O21Si	-3.5244	2672.83	8.03934	13.1595	224.862	600.612	3.63505	0	-1.38992	61.0579	-3.2522	0	1.60126	FALSE	0	0
306	2-(Heptafluoropropyl)-1,3,5-trimethoxybenzene		CAS_RN: 1422444-58-3	COc1cc(OC)c(c(OC)c1)C(F)(F)C(F)(F)C(F)(F)F	COc1cc(OC)c(C(F)(F)C(F)(F)C(F)(F)F)c(OC)c1	C12H11F7O3	-3.7766	803.75	2.3811	12.1669	186.343	653.228	2.70436	0	0	44.5513	0	0	1.63525	FALSE	0	0
307	2-[[[[3-(acryloyloxy)-2,2-bis[(acryloyloxy)methyl]propoxy]methyl(3,3,4,4,5,5,6,6,7,7,8,8,8-tridecafluorooctyl)silyl]oxy]methyl]-2-[(acryloyloxy)methyl]propane-1,3-diyl diacrylate		CAS_RN: 94237-12-4	O=C(OCC(COC(=O)C=C)(COC(=O)C=C)COC[SiH](OCC(COC(=O)C=C)(COC(=O)C=C)COC(=O)C=C)CCC(F)(F)C(F)(F)C(F)(F)C(F)(F)C(F)(F)C(F)(F)F)C=C	C=CC(=O)OCC(COC[SiH](CCC(F)(F)C(F)(F)C(F)(F)C(F)(F)C(F)(F)C(F)(F)F)OCC(COC(=O)C=C)(COC(=O)C=C)COC(=O)C=C)(COC(=O)C=C)COC(=O)C=C	C37H41F13O14Si	-2.2614	2240.85	7.07467	12.9054	216.006	1111.7	3.50786	0	-1.20514	37.3054	-2.72694	0	1.41626	FALSE	0	0
308	N,N-Diethyl-2H-perfluoropropanamine		CAS_RN: 309-88-6	CCN(CC)C(F)(F)C(F)C(F)(F)F	CCN(CC)C(F)(F)C(F)C(F)(F)F	C7H11F6N	-6.5913	633.92	0.5	11.1968	113.12	787.397	2.01453	0	0	20.298	-0.347222	0	2.39172	FALSE	0	0
309	Methyl 4,6,6-trichloro-7,7,7-trifluoro-3,3-dimethylheptanoate		CAS_RN: 72714-62-6	COC(=O)CC(C)(C)C(Cl)CC(Cl)(Cl)C(F)(F)F	COC(=O)CC(C)(C)C(Cl)CC(Cl)(Cl)C(F)(F)F	C10H14Cl3F3O2	-3.1928	268.22	1.31037	11.4049	163.55	-326.477	2.95146	0	-0.339097	60.2195	0.200861	0	1.82577	FALSE	0	0
310	N,N,N-Triethylethanaminium pentadecafluorooctanoate		CAS_RN: 98241-25-9	CC[N+](CC)(CC)CC.[O-]C(=O)C(F)(F)C(F)(F)C(F)(F)C(F)(F)C(F)(F)C(F)(F)C(F)(F)F	CC[N+](CC)(CC)CC	C8H20N	-9.5662	150	0	10.0213	58.968	-56.6876	1.59803	0	0	-0.3715	1.28125	0	3.31927	FALSE	0	0
311	3,3,4,4,5,5,6,6,6-nonafluoro-1-nitrohex-1-ene		CAS_RN: 306935-66-0	[O-][N+](=O)C=CC(F)(F)C(F)(F)C(F)(F)C(F)(F)F	O=[N+]([O-])C=CC(F)(F)C(F)(F)C(F)(F)C(F)(F)F	C6H2F9NO2	-1.52	859.5	3.96541	11.8599	203.912	243.301	2.30476	0	0	-29.0808	0	0	1.356	TRUE	1	0
312	Morpholine, 2,2,3,3,5,5,6,6-octafluoro-4-[1,2,2,2-tetrafluoro-1-(trifluoromethyl)ethyl]-		CAS_RN: 1600-71-1	FC(F)(F)C(F)(N1C(F)(F)C(F)(F)OC(F)(F)C1(F)F)C(F)(F)F	FC(F)(F)C(F)(N1C(F)(F)C(F)(F)OC(F)(F)C1(F)F)C(F)(F)F	C7F15NO	-3.297	1694.63	8.99719	12.8239	214.429	-36.1574	2.53601	0	0	-4.5358	0	0	1.36477	FALSE	0	0
313	ether-substituted perfluoroalkyl (linear) caborxylic acids_ii, n=11		NA	FC(F)(F)OC(F)(F)C(F)(F)C(F)(F)C(F)(F)C(F)(F)C(F)(F)C(F)(F)C(F)(F)C(F)(F)C(F)(F)C(F)(F)C(O)=O	O=C(O)C(F)(F)C(F)(F)C(F)(F)C(F)(F)C(F)(F)C(F)(F)C(F)(F)C(F)(F)C(F)(F)C(F)(F)C(F)(F)OC(F)(F)F	C13HF25O3	0.0501	3401.13	18.4696	13.2485	237.048	50.8338	3.22923	7.6474	-4.67241	-123.424	0	1	0.80139	TRUE	1	0
314	multiple H-substituted, multiple ether-substituted perfluoroalkyl alcohols, n=5, m=20		NA	FC(F)(F)C(F)(F)C(F)(F)C(F)(F)C(F)(F)C(F)(F)C(F)(F)C(F)(F)C(F)(F)C(F)(F)CCOCCOCCOCCOCCOCCOCCOCCOCCOCCOCCOCCOCCOCCOCCOCCOCCOCCOCCOCCO[H]	OCCOCCOCCOCCOCCOCCOCCOCCOCCOCCOCCOCCOCCOCCOCCOCCOCCOCCOCCOCCC(F)(F)C(F)(F)C(F)(F)C(F)(F)C(F)(F)C(F)(F)C(F)(F)C(F)(F)C(F)(F)C(F)(F)F	C50H81F21O20	-5.8499	3208.63	15.1596	13.1666	130.428	5192.63	3.48475	8.5972	0	-58.8792	-2.85572	0	2.64707	FALSE	0	0
315	N-Allylperfluorononanamide		CAS_RN: 221466-77-9	FC(F)(F)C(F)(F)C(F)(F)C(F)(F)C(F)(F)C(F)(F)C(F)(F)C(F)(F)C(=O)NCC=C	C=CCNC(=O)C(F)(F)C(F)(F)C(F)(F)C(F)(F)C(F)(F)C(F)(F)C(F)(F)C(F)(F)F	C12H6F17NO	-0.6262	2168.67	11.2406	12.8387	218.491	1760.5	2.96545	0	-3.56614	-77.7864	-1.2376	0	1.18708	TRUE	1	0
316	Heptafluorobutyronitrile		CAS_RN: 375-00-8	FC(F)(F)C(F)(F)C(F)(F)C#N	N#CC(F)(F)C(F)(F)C(F)(F)F	C4F7N	-1.9725	547.5	2.3811	11.2788	207.551	9.03043	1.58175	0	0	-39.0871	0	0	1.59851	FALSE	0	0
317	n:2 fluorotelomer thio alkyl amido betaine-related, n=2		NA	FC(F)(F)C(F)(F)C(F)(F)C(F)(F)CCSCC(NCCC[N+](C)(C)CC(O)=O)=O	C[N+](C)(CCCNC(=O)CSCCC(F)(F)C(F)(F)C(F)(F)C(F)(F)F)CC(=O)O	C15H21F9N2O3S	-2.3394	1074.43	3.96541	12.0658	139.744	716.688	3.18641	8.7302	-1.00592	28.6099	-1.86387	1	1.38506	FALSE	0	0
318	[4,4,5,5,6,6,7,7,8,8,9,9,10,11,11,11-hexadecafluoro-2-hydroxy-10-(trifluoromethyl)undecyl]trimethylammonium iodide		CAS_RN: 80909-29-1	[I-].C[N+](C)(C)CC(O)CC(F)(F)C(F)(F)C(F)(F)C(F)(F)C(F)(F)C(F)(F)C(F)(C(F)(F)F)C(F)(F)F	C[N+](C)(C)CC(O)CC(F)(F)C(F)(F)C(F)(F)C(F)(F)C(F)(F)C(F)(F)C(F)(C(F)(F)F)C(F)(F)F	C15H15F19NO	-2.3683	3109.94	13.7028	13.036	181.493	1538.08	3.21821	9.2981	0	-7.1858	-2.95704	0	1.29415	TRUE	1	0
319	1,4-Bis(heptafluoroisopropyl)benzene		CAS_RN: 51114-12-6	FC(F)(F)C(F)(C1=CC=C(C=C1)C(F)(C(F)(F)F)C(F)(F)F)C(F)(F)F	FC(F)(F)C(F)(c1ccc(C(F)(C(F)(F)F)C(F)(F)F)cc1)C(F)(F)F	C12H4F14	0	1681.17	4.53408	12.5079	178.178	714.062	2.70105	0	0	119.744	0	0	1.55018	FALSE	0	0
320	Perfluorodecane		CAS_RN: 307-45-9	FC(F)(F)C(F)(F)C(F)(F)C(F)(F)C(F)(F)C(F)(F)C(F)(F)C(F)(F)C(F)(F)C(F)(F)F	FC(F)(F)C(F)(F)C(F)(F)C(F)(F)C(F)(F)C(F)(F)C(F)(F)C(F)(F)C(F)(F)C(F)(F)F	C10F22	-0.8067	2613.38	15.1596	13.0083	236.547	-4.38651	2.8685	0	0	-114.523	0	0	1.11924	TRUE	1	0
321	N-Butyl-2,2,3,3,4,4,5,5,5-nonafluoropentanamide		CAS_RN: 73602-44-5	CCCCNC(=O)C(F)(F)C(F)(F)C(F)(F)C(F)(F)F	CCCCNC(=O)C(F)(F)C(F)(F)C(F)(F)C(F)(F)F	C9H10F9NO	-1.9779	992.46	3.96541	11.98	165.544	2479.58	2.54188	0	-2.889	-6.9705	-0.556952	0	1.67284	FALSE	0	0
322	Cl-substituted,ether-substituted perfluoroalkyl (linear)sulfonic acids, n=7		NA	S(=O)(O)(=O)C(F)(F)C(F)(F)OC(F)(F)C(F)(F)C(F)(F)C(F)(F)C(F)(F)C(F)(F)C(F)(F)Cl	O=S(=O)(O)C(F)(F)C(F)(F)OC(F)(F)C(F)(F)C(F)(F)C(F)(F)C(F)(F)C(F)(F)C(F)(F)Cl	C9HClF18O4S	-0.1155	2275.06	11.9359	12.9153	245.471	160.069	3.0966	7.9024	0	-108.781	0	1	0.58559	TRUE	1	0
323	1,1,1,2,2,3,3,4,4-Nonafluoroundec-5-ene		CAS_RN: 383145-46-8	CCCCCC=CC(F)(F)C(F)(F)C(F)(F)C(F)(F)F	CCCCCC=CC(F)(F)C(F)(F)C(F)(F)C(F)(F)F	C11H13F9	-1.9476	876.25	3.96541	11.8548	150.783	2530.87	2.56457	0	0	14.2947	-0.113989	0	1.83177	FALSE	0	0
324	4,4,5,5,6,6,7,7,7-Nonafluoroheptyl iodide		CAS_RN: 183547-74-2	FC(F)(F)C(F)(F)C(F)(F)C(F)(F)CCCI	FC(F)(F)C(F)(F)C(F)(F)C(F)(F)CCCI	C7H6F9I	-1.7707	846.46	3.96541	11.8265	192.754	-1507.56	2.42832	0	0	-0.2917	-1.67301	0	1.57665	FALSE	0	0
325	N-Ethyl-2,2,3,3,4,4,5,5,5-nonafluoropentanamide		CAS_RN: 158018-93-0	CCNC(=O)C(F)(F)C(F)(F)C(F)(F)C(F)(F)F	CCNC(=O)C(F)(F)C(F)(F)C(F)(F)C(F)(F)F	C7H6F9NO	-1.8411	966.75	3.96541	11.9585	184.332	1618.54	2.38236	0	-2.91766	-26.9717	-0.650702	0	1.43842	FALSE	0	0
326	Sodium 2,2,3,3,4,4,5,5,6,7,7,7-dodecafluoro-6-(trifluoromethyl)heptanoate		CAS_RN: 18017-22-6	[Na+].[O-]C(=O)C(F)(F)C(F)(F)C(F)(F)C(F)(F)C(F)(C(F)(F)F)C(F)(F)F	O=C(O)C(F)(F)C(F)(F)C(F)(F)C(F)(F)C(F)(C(F)(F)F)C(F)(F)F	C8HF15O2	1.2039	2428.94	9.83452	12.709	227.027	-25.7484	2.6122	7.5821	-4.30884	-47.306	0	1	0.633718	TRUE	1	0
327	Propan-2-yl 2,3,3,3-tetrafluoro-2-[1,1,2,3,3,3-hexafluoro-2-(heptafluoropropoxy)propoxy]propanoate		CAS_RN: 145510-88-9	CC(C)OC(=O)C(F)(OC(F)(F)C(F)(OC(F)(F)C(F)(F)C(F)(F)F)C(F)(F)F)C(F)(F)F	CC(C)OC(=O)C(F)(OC(F)(F)C(F)(OC(F)(F)C(F)(F)C(F)(F)F)C(F)(F)F)C(F)(F)F	C12H7F17O4	-3.8652	1769.69	9.19158	12.6869	229.951	1469.65	3.16477	0	-3.6652	21.5165	0	0	1.52408	FALSE	0	0
328	1H-Perfluoro-1,1-propanediol		CAS_RN: 422-63-9	OC(O)C(F)(F)C(F)(F)F	OC(O)C(F)(F)C(F)(F)F	C3H3F5O2	3.3946	347.5	1	10.7735	74.1835	375.056	1.58175	7.5013	0	-4.3788	0	0	2.30416	FALSE	0	0
329	Vinylidene fluoride		CAS_RN: 75-38-7	FC(F)=C	C=C(F)F	C2H2F2	-11.0291	0	0	6.8804	0	-321.863	1.47355	0	-1.83333	-4.7306	0	0	4.4813	FALSE	0	0
330	5H-Perfluoropentanal		CAS_RN: 2648-47-7	FC(F)C(F)(F)C(F)(F)C(F)(F)C=O	O=CC(F)(F)C(F)(F)C(F)(F)C(F)F	C5H2F8O	-2.3044	743.25	2.3811	11.5494	165.082	-14.6851	1.58175	0	0	-57.5585	0	0	1.66948	FALSE	0	0
331	2,3,4,5,6-Pentafluoro-N-(3-{[4-(1,1,1,2,3,3,3-heptafluoropropan-2-yl)-2,6-dimethylphenyl]carbamoyl}phenyl)benzamide		CAS_RN: 862130-96-9	Cc1cc(cc(C)c1NC(=O)c1cccc(NC(=O)c2c(F)c(F)c(F)c(F)c2F)c1)C(F)(C(F)(F)F)C(F)(F)F	Cc1cc(C(F)(C(F)(F)F)C(F)(F)F)cc(C)c1NC(=O)c1cccc(NC(=O)c2c(F)c(F)c(F)c(F)c2F)c1	C25H14F12N2O2	1.7754	1633.75	2.3811	12.7224	205.279	623.413	3.21821	0	-1.77623	61.0382	0	0	1.30537	TRUE	1	0
332	AGN-PC-0NHL39		CAS_RN: 40161-59-9	FC(F)(F)C(F)(C1=CC=C(I)C=C1)C(F)(F)F	FC(F)(F)C(F)(c1ccc(I)cc1)C(F)(F)F	C9H4F7I	0	849.34	2.3811	11.8624	184.322	-3182.64	2.56928	0	0	85.3578	0	0	2.04397	FALSE	0	0
333	2,2,3,3,4,4,5,5,6,6,6-Undecafluorohexyl nonafluorobutane-1-sulfonate		CAS_RN: 924894-08-6	FC(F)(F)C(F)(F)C(F)(F)C(F)(F)C(F)(F)COS(=O)(=O)C(F)(F)C(F)(F)C(F)(F)C(F)(F)F	O=S(=O)(OCC(F)(F)C(F)(F)C(F)(F)C(F)(F)C(F)(F)F)C(F)(F)C(F)(F)C(F)(F)C(F)(F)F	C10H2F20O3S	-1.8732	2186.81	9.53588	12.8703	223.653	-509.061	3.12047	0	0	-76.1218	-4.38344	0	1.50589	FALSE	0	0
334	4-(1,1,1,2,3,3,3-Heptafluoropropan-2-yl)-2,6-dimethylbenzaldehyde		CAS_RN: 1771743-29-3	Cc1cc(cc(C)c1C=O)C(F)(C(F)(F)F)C(F)(F)F	Cc1cc(C(F)(C(F)(F)F)C(F)(F)F)cc(C)c1C=O	C12H9F7O	0	956.75	2.3811	12.0906	160.822	363.897	2.67005	0	0	98.1574	0	0	1.63194	FALSE	0	0
335	2,3,3,3-Tetrafluoro-2-(heptafluoropropoxy)propyl 2-fluoroprop-2-enoate		CAS_RN: 96250-49-6	FC(=C)C(=O)OCC(F)(OC(F)(F)C(F)(F)C(F)(F)F)C(F)(F)F	C=C(F)C(=O)OCC(F)(OC(F)(F)C(F)(F)C(F)(F)F)C(F)(F)F	C9H4F12O3	-3.8453	930.79	4.5088	12.0744	224.176	151.921	2.66216	0	-2.43447	-6.0072	-3.0121	0	1.54677	FALSE	0	0
336	multiple H-substituted, multiple ether-substituted perfluoroalkyl alcohols, n=3, m=7		NA	FC(F)(F)C(F)(F)C(F)(F)C(F)(F)C(F)(F)C(F)(F)CCOCCOCCOCCOCCOCCOCCO[H]	OCCOCCOCCOCCOCCOCCOCCC(F)(F)C(F)(F)C(F)(F)C(F)(F)C(F)(F)C(F)(F)F	C20H29F13O7	-4.7091	1644.63	7.47342	12.4816	137.605	2717.96	3.30233	8.4902	0	-20.5802	-2.42172	0	1.89386	FALSE	0	0
337	2,2,4,4,5,5,5-Heptafluoro-3-(pentafluoroethyl)-3-(trifluoromethyl)pentanoic acid		CAS_RN: 1882109-67-2	OC(=O)C(F)(F)C(C(F)(F)F)(C(F)(F)C(F)(F)F)C(F)(F)C(F)(F)F	O=C(O)C(F)(F)C(C(F)(F)F)(C(F)(F)C(F)(F)F)C(F)(F)C(F)(F)F	C8HF15O2	1.2039	2405.06	11.0294	12.8855	200.228	-88.0899	2.65965	7.747	-4.72438	28.6468	0	1	0.882733	TRUE	1	0
338	1-Pentanesulfonamide, 1,1,2,2,3,3,4,4,5,5,5-undecafluoro-N-(2-hydroxyethyl)-N-methyl-		CAS_RN: 68555-74-8	CN(CCO)S(=O)(=O)C(F)(F)C(F)(F)C(F)(F)C(F)(F)C(F)(F)F	CN(CCO)S(=O)(=O)C(F)(F)C(F)(F)C(F)(F)C(F)(F)C(F)(F)F	C8H8F11NO3S	-1.6879	1461.75	5.67624	12.4871	177.781	589.629	2.70851	8.3326	0	-28.6728	-1.2861	0	1.02787	TRUE	1	0
339	Bis[2,8-di(trifluoromethyl)quinolin-4-yl-2-pyridyl] ketone		CAS_RN: 35853-55-5	O=C(C1=NC=CC=C1C2=CC(=NC3=C2C=CC=C3C(F)(F)F)C(F)(F)F)C4=NC=CC=C4C5=CC(=NC6=C5C=CC=C6C(F)(F)F)C(F)(F)F	O=C(c1ncccc1-c1cc(C(F)(F)F)nc2c(C(F)(F)F)cccc12)c1ncccc1-c1cc(C(F)(F)F)nc2c(C(F)(F)F)cccc12	C33H14F12N4O	0.3894	975.89	0.635275	13.0537	267.768	771.56	3.58689	0	-1.22945	232.574	0	0	1.96827	FALSE	0	0
340	1,1,1,2,2,3,3,4,4,5,5,6,6-Tridecafluoroicosane		CAS_RN: 154628-00-9	CCCCCCCCCCCCCCC(F)(F)C(F)(F)C(F)(F)C(F)(F)C(F)(F)C(F)(F)F	CCCCCCCCCCCCCCC(F)(F)C(F)(F)C(F)(F)C(F)(F)C(F)(F)C(F)(F)F	C20H29F13	-1.1965	1577.88	7.47342	12.454	140.056	4713.02	3.20921	0	0	15.6119	-2.08265	0	2.32493	FALSE	0	0
341	2,2,3,3,4,4,5,5,6,6,6-Undecafluorohexyl methanesulfonate		CAS_RN: 188534-35-2	CS(=O)(=O)OCC(F)(F)C(F)(F)C(F)(F)C(F)(F)C(F)(F)F	CS(=O)(=O)OCC(F)(F)C(F)(F)C(F)(F)C(F)(F)C(F)(F)F	C7H5F11O3S	-2.7446	1170.4	5.67624	12.2328	195.297	-623.052	2.42573	0	0	-32.517	-3.00126	0	1.50911	FALSE	0	0
342	(2E)-1,1,1,4,4,5,5,6,6,6-Decafluorohex-2-ene		CAS_RN: 83227-62-7	FC(F)(F)C=CC(F)(F)C(F)(F)C(F)(F)F	FC(F)(F)C=CC(F)(F)C(F)(F)C(F)(F)F	C6H2F10	-1.9166	576.56	2.7016	11.5187	198.193	70.4205	1.58175	0	0	-4.5834	0	0	1.59157	FALSE	0	0
343	Bis(2-(perfluorododecyl)ethyl) hydrogen phosphate		CAS_RN: 57677-99-3	C(C(C(C(C(C(C(C(C(C(C(C(C(F)(F)F)(F)F)(F)F)(F)F)(F)F)(F)F)(F)F)(F)F)(F)F)(F)F)(F)F)(F)F)CO[P](=O)(OCCC(C(C(C(C(C(C(C(C(C(C(C(F)(F)F)(F)F)(F)F)(F)F)(F)F)(F)F)(F)F)(F)F)(F)F)(F)F)(F)F)(F)F)O	O=P(O)(OCCC(F)(F)C(F)(F)C(F)(F)C(F)(F)C(F)(F)C(F)(F)C(F)(F)C(F)(F)C(F)(F)C(F)(F)C(F)(F)C(F)(F)F)OCCC(F)(F)C(F)(F)C(F)(F)C(F)(F)C(F)(F)C(F)(F)C(F)(F)C(F)(F)C(F)(F)C(F)(F)C(F)(F)C(F)(F)F	C28H9F50O4P	-0.7494	6626.03	0	13.9755	220.517	916.483	3.73466	9.1605	0	-230.86	-4.14576	1	1.75123	FALSE	0	0
344	1,1,1,2,2,3,3,4,4,5,5,6,6-Tridecafluoro-6-methoxyhexane		CAS_RN: 226909-72-4	COC(F)(F)C(F)(F)C(F)(F)C(F)(F)C(F)(F)C(F)(F)F	COC(F)(F)C(F)(F)C(F)(F)C(F)(F)C(F)(F)C(F)(F)F	C7H3F13O	-3.1431	1431.75	7.47342	12.3785	200.545	352.583	2.4847	0	0	-63.7191	0	0	1.3445	TRUE	1	0
345	1,1,1,2,2,3,3,4,4,5,5,6,6,7,7,14,14,15,15,16,16,17,17,18,18,19,19,20,20,20-Triacontafluoro-9,12-diiodoicosane		CAS_RN: 25474-72-0	FC(F)(F)C(F)(F)C(F)(F)C(F)(F)C(F)(F)C(F)(F)C(F)(F)CC(I)CCC(I)CC(F)(F)C(F)(F)C(F)(F)C(F)(F)C(F)(F)C(F)(F)C(F)(F)F	FC(F)(F)C(F)(F)C(F)(F)C(F)(F)C(F)(F)C(F)(F)C(F)(F)CC(I)CCC(I)CC(F)(F)C(F)(F)C(F)(F)C(F)(F)C(F)(F)C(F)(F)C(F)(F)F	C20H10F30I2	-0.5058	3499.98	15.9426	13.3481	222.955	-11741.5	3.7262	0	0	-31.4727	-2.94892	0	4.84593	FALSE	0	0
346	3,5,6-Trifluoro-4-(1,1,1,2,3,3,3-heptafluoropropan-2-yl)pyridin-2-amine		CAS_RN: 55181-17-4	Nc1nc(F)c(F)c(c1F)C(F)(C(F)(F)F)C(F)(F)F	Nc1nc(F)c(F)c(C(F)(C(F)(F)F)C(F)(F)F)c1F	C8H2F10N2	3.3145	1123.08	2.3811	12.2261	215.273	46.4087	2.28187	0	0	22.9414	0	0	1.4117	FALSE	0	0
347	n:1:2 fluorotelomer betaine-related, n=6		NA	C[N+](CC(O)=O)(C)CCC(F)C(F)(F)C(F)(F)C(F)(F)C(F)(F)C(F)(F)C(F)(F)C(F)(F)C(F)(F)C(F)(F)C(F)(F)C(F)(F)C(F)(F)C(F)(F)F	C[N+](C)(CCC(F)C(F)(F)C(F)(F)C(F)(F)C(F)(F)C(F)(F)C(F)(F)C(F)(F)C(F)(F)C(F)(F)C(F)(F)C(F)(F)C(F)(F)C(F)(F)F)CC(=O)O	C20H13F28NO2	-1.4627	3826.6	21.2152	13.4263	191.465	2435.21	3.42672	8.5546	-1.87625	-114.87	-2.37234	1	1.21936	TRUE	1	0
348	6-(Ethenyloxy)-1,1,1,2,2,3,3,4,4,5,5-undecafluorohexane		CAS_RN: 595-00-6	FC(F)(F)C(F)(F)C(F)(F)C(F)(F)C(F)(F)COC=C	C=COCC(F)(F)C(F)(F)C(F)(F)C(F)(F)C(F)(F)F	C8H5F11O	-3.2999	1158.81	5.67624	12.1584	187.867	577.44	2.4159	0	0	-42.0605	-2.56247	0	1.4982	FALSE	0	0
349	1,1,1,2,2,3,3,4,5,5,6,6,6-Tridecafluorohexane		CAS_RN: 1998-67-0	FC(C(F)(F)C(F)(F)F)C(F)(F)C(F)(F)C(F)(F)F	FC(C(F)(F)C(F)(F)F)C(F)(F)C(F)(F)C(F)(F)F	C6HF13	-1.5795	1136.38	4.5088	12.0767	210.589	-24.0116	2.25362	0	0	-51.69	0	0	1.29616	TRUE	1	0
350	Tris(2,2,3,3,4,4,5,5-octafluoropentyl) phosphate		CAS_RN: 355-86-2	P(=O)(OCC(C(C(C(F)F)(F)F)(F)F)(F)F)(OCC(C(C(C(F)F)(F)F)(F)F)(F)F)OCC(C(C(C(F)F)(F)F)(F)F)(F)F	O=P(OCC(F)(F)C(F)(F)C(F)(F)C(F)F)(OCC(F)(F)C(F)(F)C(F)(F)C(F)F)OCC(F)(F)C(F)(F)C(F)(F)C(F)F	C15H9F24O4P	-3.2039	2233.76	7.2007	12.8502	202.242	-1714.53	3.37861	0	0	-119.84	-3.96904	0	1.72954	FALSE	0	0
351	8:1 Fluorotelomer alcohol	8:1FTOH	CAS_RN: 423-56-3	OCC(F)(F)C(F)(F)C(F)(F)C(F)(F)C(F)(F)C(F)(F)C(F)(F)C(F)(F)F	OCC(F)(F)C(F)(F)C(F)(F)C(F)(F)C(F)(F)C(F)(F)C(F)(F)C(F)(F)F	C9H3F17O	0.6921	2061.38	11.2406	12.7577	215.355	508.486	2.66606	7.7447	0	-92.5475	-3.45204	0	0.948358	TRUE	1	0
352	1-chloro-1,1,2,2,3,3-hexafluoro-3-[(trifluorovinyl)oxy]propane		CAS_RN: 80962-91-0	FC(F)=C(F)OC(F)(F)C(F)(F)C(F)(F)Cl	FC(F)=C(F)OC(F)(F)C(F)(F)C(F)(F)Cl	C5ClF9O	-2.9553	553.74	2.3811	11.535	257.638	-23.5035	2.25906	0	-3.4636	-50.5885	0	0	1.56986	FALSE	0	0
353	n:2 fluorotelomer thio ethanoic acids, n=3		CAS_RN: 123708-11-2	O=C(O)CSCCC(F)(F)C(F)(F)C(F)(F)C(F)(F)C(F)(F)C(F)(F)F	O=C(O)CSCCC(F)(F)C(F)(F)C(F)(F)C(F)(F)C(F)(F)C(F)(F)F	C10H7F13O2S	1.1199	1456.91	7.47342	12.4331	195.943	490.786	2.8663	8.213	-1.51483	-15.3743	-2.26989	1	0.678953	TRUE	1	0
354	2,2,3,3,4,4,4-Heptafluorobutyl carbonochloridate		CAS_RN: 108156-21-4	FC(F)(F)C(F)(F)C(F)(F)COC(Cl)=O	O=C(Cl)OCC(F)(F)C(F)(F)C(F)(F)F	C5H2ClF7O2	-3.7419	570.75	2.3811	11.4149	208.726	-11.1523	2.08832	0	-1.21823	-16.1981	-2.28367	0	1.63775	FALSE	0	0
355	2,2,3,3,4,4,5,5,6,6,6-Undecafluorohexanimidamide		CAS_RN: 464-21-1	NC(=N)C(F)(F)C(F)(F)C(F)(F)C(F)(F)C(F)(F)F	N=C(N)C(F)(F)C(F)(F)C(F)(F)C(F)(F)C(F)(F)F	C6H3F11N2	4.5179	1225.31	5.67624	12.2042	193.099	364.482	2.36994	0	-2.9906	-55.7041	0	0	1.38703	FALSE	0	0
356	Perfluoro(2-(2-phenoxypropoxy)propanoyl) fluoride		CAS_RN: 25711-77-7	FC(=O)C(F)(OC(F)(F)C(F)(OC1=C(F)C(F)=C(F)C(F)=C1F)C(F)(F)F)C(F)(F)F	O=C(F)C(F)(OC(F)(F)C(F)(Oc1c(F)c(F)c(F)c(F)c1F)C(F)(F)F)C(F)(F)F	C12F16O3	-1.6367	1597.17	4.5088	12.5964	269.887	0.885246	3.04927	0	-4.59682	-32.4253	0	0	1.41232	FALSE	0	0
357	4,5-Dibromo-1,1,1,2,2,3,3-heptafluoropentane		CAS_RN: 377-46-8	FC(F)(F)C(F)(F)C(F)(F)C(Br)CBr	FC(F)(F)C(F)(F)C(F)(F)C(Br)CBr	C5H3Br2F7	-1.5276	530.36	2.3811	11.5194	215.584	428.473	2.25974	0	0	8.3074	-0.121947	0	1.47625	FALSE	0	0
358	Potassium N-((heptadecafluorooctyl)sulphonyl)-N-propylglycinate		CAS_RN: 55910-10-6	[K+].CCCN(CC([O-])=O)S(=O)(=O)C(F)(F)C(F)(F)C(F)(F)C(F)(F)C(F)(F)C(F)(F)C(F)(F)C(F)(F)F	CCCN(CC(=O)O)S(=O)(=O)C(F)(F)C(F)(F)C(F)(F)C(F)(F)C(F)(F)C(F)(F)C(F)(F)C(F)(F)F	C13H10F17NO4S	-1.025	2382.72	11.2406	13.013	207.212	1614.45	3.21747	8.4413	-2.41779	-57.6305	-2.18828	1	0.757318	TRUE	1	0
359	4-[(Heptadecafluorooctyl)oxy]-4-oxobut-2-enoic acid		CAS_RN: 152682-85-4	OC(=O)C=CC(=O)OC(F)(F)C(F)(F)C(F)(F)C(F)(F)C(F)(F)C(F)(F)C(F)(F)C(F)(F)F	O=C(O)C=CC(=O)OC(F)(F)C(F)(F)C(F)(F)C(F)(F)C(F)(F)C(F)(F)C(F)(F)C(F)(F)F	C12H3F17O4	-0.0879	2194.04	11.2406	12.8258	234.341	484.01	3.07311	8.0001	-3.05381	-62.084	0	1	0.447252	TRUE	1	0
360	1-Pentafluoroethylethanol		CAS_RN: 374-40-3	CC(O)C(F)(F)C(F)(F)F	CC(O)C(F)(F)C(F)(F)F	C4H5F5O	-1.352	288	1	10.7735	74.1835	540.869	1.58175	7.9458	0	8.9152	0	0	2.28935	FALSE	0	0
361	Perfluorohexyl iodide		CAS_RN: 355-43-1	FC(C(C(C(F)(F)I)(F)F)(F)F)(C(C(F)(F)F)(F)F)F	FC(F)(F)C(F)(F)C(F)(F)C(F)(F)C(F)(F)C(F)(F)I	C6F13I	-0.8982	1302.8	7.47342	12.3324	255.592	-632.459	2.49585	0	0	-83.5025	0	0	1.28715	TRUE	1	0
362	perfluoroalkanesulfonamido quaternary ammonium diol C, n=6		NA	S(NCCC[N+](CCC(O)CO)(C)C)(=O)(=O)C(F)(F)C(F)(F)C(F)(F)C(F)(F)C(F)(F)C(F)(F)F	C[N+](C)(CCCNS(=O)(=O)C(F)(F)C(F)(F)C(F)(F)C(F)(F)C(F)(F)C(F)(F)F)CCC(O)CO	C15H22F13N2O4S	-1.3748	1870.81	7.47342	12.7045	150.158	2913.09	3.15409	9.259	0	-4.2731	-1.12968	0	1.57111	FALSE	0	0
363	N-Allylperfluoro-2-(2-propoxypropoxy)propanamide		CAS_RN: 174080-50-3	FC(F)(F)C(F)(F)C(F)(F)OC(F)(C(F)(F)F)C(F)(F)OC(F)(C(=O)NCC=C)C(F)(F)F	C=CCNC(=O)C(F)(OC(F)(F)C(F)(OC(F)(F)C(F)(F)C(F)(F)F)C(F)(F)F)C(F)(F)F	C12H6F17NO3	-2.4587	1751.73	9.19158	12.6737	226.146	1604.49	3.16517	0	-3.46622	9.8575	-1.24809	0	1.36632	FALSE	0	0
364	S-Deoxo fulvestrant		CAS_RN: 153004-31-0	C[C@]12CC[C@H]3[C@H]([C@@H]1CC[C@@H]2O)[C@H](CCCCCCCCCSCCCC(F)(F)C(F)(F)F)CC1=C3C=CC(O)=C1	C[C@]12CC[C@@H]3c4ccc(O)cc4C[C@@H](CCCCCCCCCSCCCC(F)(F)C(F)(F)F)[C@H]3[C@@H]1CC[C@@H]2O	C32H47F5O2S	3.6755	645.22	0.445192	12.63	133.527	383.998	3.37433	10.8419	0	62.1354	-1.04828	0	1.65413	FALSE	0	0
365	Ethyl 4,4,5,5,6,6,6-heptafluoro-3,3-bis(trifluoromethyl)hexanoate		CAS_RN: 161261-13-8	CCOC(=O)CC(C(F)(F)F)(C(F)(F)F)C(F)(F)C(F)(F)C(F)(F)F	CCOC(=O)CC(C(F)(F)F)(C(F)(F)F)C(F)(F)C(F)(F)C(F)(F)F	C10H7F13O2	-2.6572	2209.5	7.94418	12.6045	199.084	874.267	2.96945	0	-2.69926	74.1876	-3.53521	0	1.57952	FALSE	0	0
366	3,3,4,4,5,5,6,6,7,7,8,8,9,9,10,10,11,11,12,12,12-Henicosafluorododecyl phenylcarbamate		CAS_RN: 305849-13-2	FC(F)(F)C(F)(F)C(F)(F)C(F)(F)C(F)(F)C(F)(F)C(F)(F)C(F)(F)C(F)(F)C(F)(F)CCOC(=O)Nc1ccccc1	O=C(Nc1ccccc1)OCCC(F)(F)C(F)(F)C(F)(F)C(F)(F)C(F)(F)C(F)(F)C(F)(F)C(F)(F)C(F)(F)C(F)(F)F	C19H10F21NO2	-0.3906	2780.83	15.1596	13.1085	209.49	2069.51	3.35188	0	-1.82648	-46.4392	-3.0398	0	1.36974	FALSE	0	0
367	(1R-trans)-N,N'-1,2-Cyclohexanediylbis(perfluorobutanamide)		CAS_RN: 133964-60-0	FC(F)(F)C(F)(F)C(F)(F)C(=O)NC1CCCCC1NC(=O)C(F)(F)C(F)(F)C(F)(F)F	O=C(NC1CCCCC1NC(=O)C(F)(F)C(F)(F)C(F)(F)F)C(F)(F)C(F)(F)C(F)(F)F	C14H12F14N2O2	0.2728	1422.67	3.67785	12.4713	176.561	3104.56	2.94504	0	-3.23763	30.7088	-0.605564	0	1.70258	FALSE	0	0
368	1-Phenoxy(3-(perfluoro-7-methyloctyl)propan-2-ol)		CAS_RN: 94159-92-9	C1=C(OCC(O)CC(F)(F)C(F)(F)C(F)(F)C(F)(F)C(F)(F)C(F)(F)C(F)(C(F)(F)F)C(F)(F)F)C=CC=C1	OC(COc1ccccc1)CC(F)(F)C(F)(F)C(F)(F)C(F)(F)C(F)(F)C(F)(F)C(F)(C(F)(F)F)C(F)(F)F	C18H11F19O2	0.2823	3074.6	13.7028	13.0459	203.882	1801.52	3.21821	9.3144	0	12.6667	-3.0847	0	1.1955	TRUE	1	0
369	2,2,3,3,4,4,5,5,6,6,7,7,8,8,9,9,9-Heptadecafluoro-N-(propan-2-yl)nonanamide		CAS_RN: 6104-22-9	CC(C)NC(=O)C(F)(F)C(F)(F)C(F)(F)C(F)(F)C(F)(F)C(F)(F)C(F)(F)C(F)(F)F	CC(C)NC(=O)C(F)(F)C(F)(F)C(F)(F)C(F)(F)C(F)(F)C(F)(F)C(F)(F)C(F)(F)F	C12H8F17NO	-0.8652	2179.38	11.2406	12.8495	215.927	1992.82	2.93633	0	-3.51512	-71.2854	0	0	1.26111	TRUE	1	0
370	Trimethoxy(3,3,4,4,5,5,6,6,7,7,8,8,8-tridecafluorooctyl)silane		CAS_RN: 85857-16-5	FC(F)(F)C(F)(F)C(F)(F)C(F)(F)C(F)(F)C(F)(F)CC[Si](OC)(OC)OC	CO[Si](CCC(F)(F)C(F)(F)C(F)(F)C(F)(F)C(F)(F)C(F)(F)F)(OC)OC	C11H13F13O3Si	-2.7337	1554.66	7.47342	12.5372	165.657	-707.545	2.7924	0	0	8.3151	-2.3817	0	1.55416	FALSE	0	0
371	5-(Heptafluoropropyl)-3-methoxy-1-methyl-1H-1,2,4-triazole		CAS_RN: 714975-34-5	COc1nc(n(C)n1)C(F)(F)C(F)(F)C(F)(F)F	COc1nc(C(F)(F)C(F)(F)C(F)(F)F)n(C)n1	C7H6F7N3O	-6.2096	679.71	2.3811	11.9704	186.985	535.411	2.49216	0	0	-12.321	0	0	1.86291	FALSE	0	0
372	4,9-Dimethoxy-7-(nonafluorobutyl)-5H-furo[3,2-g][1]benzopyran-5-one		CAS_RN: 376380-66-4	COc1c2C(=O)C=C(Oc2c(OC)c2occc12)C(F)(F)C(F)(F)C(F)(F)C(F)(F)F	COc1c2occc2c(OC)c2c(=O)cc(C(F)(F)C(F)(F)C(F)(F)C(F)(F)F)oc12	C17H9F9O5	-1.6397	1169.88	3.96541	12.7927	229.942	858.973	3.06701	0	-2.45353	59.7052	0	0	1.35973	FALSE	0	0
373	Perfluorononane amide betaine		CAS_RN: 77958-18-0	C[N+](C)(CCCNC(=O)C(F)(F)C(F)(F)C(F)(F)C(F)(F)C(F)(F)C(F)(F)C(F)(F)C(F)(F)F)CC([O-])=O	C[N+](C)(CCCNC(=O)C(F)(F)C(F)(F)C(F)(F)C(F)(F)C(F)(F)C(F)(F)C(F)(F)C(F)(F)F)CC(=O)O	C16H15F17N2O3	-2.1264	2329.04	11.2406	12.9063	168.553	2465.34	3.22744	8.626	-3.5998	-39.7503	-1.19464	1	1.24466	TRUE	1	0
374	perfluoroalkylamido betaine-related, n=8		NA	C(NCCC[N+](CC(O)=O)(C)C)(=O)C(F)(F)C(F)(F)C(F)(F)C(F)(F)C(F)(F)C(F)(F)C(F)(F)C(F)(F)F	C[N+](C)(CCCNC(=O)C(F)(F)C(F)(F)C(F)(F)C(F)(F)C(F)(F)C(F)(F)C(F)(F)C(F)(F)F)CC(=O)O	C16H15F17N2O3	-2.1264	2329.04	11.2406	12.9063	168.553	2465.34	3.22744	8.626	-3.5998	-39.7503	-1.19464	1	1.24466	TRUE	1	0
375	N-{1-[3,5-Bis({[tert-butyl(dimethyl)silyl]oxy}methyl)phenyl]-2,2,3,3,4,4,5,5,6,6,7,7,7-tridecafluoroheptylidene}hydroxylamine		CAS_RN: 1335496-61-1	CC(C)(C)[Si](C)(C)OCc1cc(CO[Si](C)(C)C(C)(C)C)cc(c1)C(=NO)C(F)(F)C(F)(F)C(F)(F)C(F)(F)C(F)(F)C(F)(F)F	CC(C)(C)[Si](C)(C)OCc1cc(CO[Si](C)(C)C(C)(C)C)cc(C(=NO)C(F)(F)C(F)(F)C(F)(F)C(F)(F)C(F)(F)C(F)(F)F)c1	C27H38F13NO3Si2	6.8478	2055.6	6.51958	12.984	140.645	-1974.76	3.35292	9.3246	-2.70049	112.19	-0.346719	0	2.061	FALSE	0	0
376	1,1,1,2,2,3,3-Heptafluoro-5-nitroheptan-4-ol		CAS_RN: 355-90-8	CCC(C(O)C(F)(F)C(F)(F)C(F)(F)F)[N+]([O-])=O	CCC(C(O)C(F)(F)C(F)(F)C(F)(F)F)[N+](=O)[O-]	C7H8F7NO3	-1.0688	876.63	2.3811	11.7944	147.625	1336.08	2.3947	8.7344	0	9.8614	-0.835621	0	1.44496	FALSE	0	0
377	1-Heptanesulfonamide, 1,1,2,2,3,3,4,4,5,5,6,6,7,7,7-pentadecafluoro-N-2-propenyl-		CAS_RN: 67584-49-0	C(N[S](=O)(=O)C(F)(F)C(F)(F)C(F)(F)C(F)(F)C(F)(F)C(F)(F)C(F)(F)F)C=C	C=CCNS(=O)(=O)C(F)(F)C(F)(F)C(F)(F)C(F)(F)C(F)(F)C(F)(F)C(F)(F)F	C10H6F15NO2S	-0.4913	1991.32	9.33326	12.7791	217.784	1243.25	2.92327	0	0	-61.9612	-1.35254	0	1.12808	TRUE	1	0
378	3,3,4,4,5,5,6,6,6-Nonafluorohexyl 4-methylbenzene-1-sulfonate		CAS_RN: 188492-56-0	Cc1ccc(cc1)S(=O)(=O)OCCC(F)(F)C(F)(F)C(F)(F)C(F)(F)F	Cc1ccc(S(=O)(=O)OCCC(F)(F)C(F)(F)C(F)(F)C(F)(F)F)cc1	C13H11F9O3S	-0.8186	1074.53	3.96541	12.1792	174.56	199.941	2.76625	0	0	43.0177	-2.35506	0	1.47479	FALSE	0	0
379	4-(1,1,1,2,3,3,3-Heptafluoropropan-2-yl)-2-methyl-3-(methylsulfanyl)benzoic acid		CAS_RN: 1355553-97-7	CSc1c(C)c(ccc1C(F)(C(F)(F)F)C(F)(F)F)C(O)=O	CSc1c(C(F)(C(F)(F)F)C(F)(F)F)ccc(C(=O)O)c1C	C12H9F7O2S	2.4334	962.55	2.3811	12.2347	193.196	453.453	2.84166	8.8845	-1.49164	102.267	0	1	1.16916	TRUE	1	0
380	Undecafluoropentyl 2-methylprop-2-enoate		CAS_RN: 89004-77-3	CC(=C)C(=O)OC(F)(F)C(F)(F)C(F)(F)C(F)(F)C(F)(F)F	C=C(C)C(=O)OC(F)(F)C(F)(F)C(F)(F)C(F)(F)C(F)(F)F	C9H5F11O2	-2.8617	1290.94	5.67624	12.242	236.482	678.908	2.58597	0	-2.40667	-10.7791	0	0	1.33497	TRUE	1	0
381	5,5,6,6,7,7,7-Heptafluoro-4,4-bis(trifluoromethyl)heptan-1-ol		CAS_RN: 110254-90-5	OCCCC(C(F)(F)F)(C(F)(F)F)C(F)(F)C(F)(F)C(F)(F)F	OCCCC(C(F)(F)F)(C(F)(F)F)C(F)(F)C(F)(F)C(F)(F)F	C9H7F13O	0.0333	2158	7.94418	12.5482	180.445	1647.51	2.58277	8.2001	0	80.6752	-2.92146	0	1.35873	FALSE	0	0
382	1-[4-(Heptafluoropropyl)-1H-pyrrol-3-yl]ethan-1-one		CAS_RN: 121103-97-7	CC(=O)C1=CNC=C1C(F)(F)C(F)(F)C(F)(F)F	CC(=O)c1c[nH]cc1C(F)(F)C(F)(F)C(F)(F)F	C9H6F7NO	0.4887	689.46	2.3811	11.9689	178.525	628.943	2.1982	0	-1.05194	32.1542	0	0	1.4359	FALSE	0	0
383	1,1,1,2,2,3,3,4-Octafluorodec-4-ene		CAS_RN: 90292-32-3	CCCCCC=C(F)C(F)(F)C(F)(F)C(F)(F)F	CCCCCC=C(F)C(F)(F)C(F)(F)C(F)(F)F	C10H12F8	-2.1747	719.83	2.3811	11.5948	147.585	2344.12	2.45142	0	-2.74914	10.7014	-0.316269	0	1.83846	FALSE	0	0
384	1H,1H,6H,6H-Perfluorohexane-1,6-diol diacrylate		CAS_RN: 2264-01-9	FC(F)(COC(=O)C=C)C(F)(F)C(F)(F)C(F)(F)COC(=O)C=C	C=CC(=O)OCC(F)(F)C(F)(F)C(F)(F)C(F)(F)COC(=O)C=C	C12H10F8O4	-3.8316	963.5	3.96541	12.0417	197.698	533.456	2.72147	0	-1.66624	-38.8635	-2.60817	0	1.50157	FALSE	0	0
385	1,1,1,2,2,3,3,4,4,5,5,6,6,7,7,8,8,9,9,10,10,11,11,12,12,19,19,20,20,21,21,22,22,23,23,24,24,25,25,26,26,27,27,28,28,29,29,30,30,30-Pentacontafluorotriacontane		CAS_RN: 114221-77-1	FC(F)(F)C(F)(F)C(F)(F)C(F)(F)C(F)(F)C(F)(F)C(F)(F)C(F)(F)C(F)(F)C(F)(F)C(F)(F)C(F)(F)CCCCCCC(F)(F)C(F)(F)C(F)(F)C(F)(F)C(F)(F)C(F)(F)C(F)(F)C(F)(F)C(F)(F)C(F)(F)C(F)(F)C(F)(F)F	FC(F)(F)C(F)(F)C(F)(F)C(F)(F)C(F)(F)C(F)(F)C(F)(F)C(F)(F)C(F)(F)C(F)(F)C(F)(F)C(F)(F)CCCCCCC(F)(F)C(F)(F)C(F)(F)C(F)(F)C(F)(F)C(F)(F)C(F)(F)C(F)(F)C(F)(F)C(F)(F)C(F)(F)C(F)(F)F	C30H12F50	-0.3839	6481.5	0	13.957	211.54	4971.22	3.73372	0	0	-185.736	-3.68578	0	2.57965	FALSE	0	0
386	3,3,4,4,5,5,6,6,6-Nonafluorohexyl formate		CAS_RN: 78689-20-0	FC(F)(F)C(F)(F)C(F)(F)C(F)(F)CCOC=O	O=COCCC(F)(F)C(F)(F)C(F)(F)C(F)(F)F	C7H5F9O2	-3.7568	905.63	3.96541	11.8384	172.676	727.81	2.40847	0	0	-16.8126	-2.17618	0	1.64645	FALSE	0	0
387	1-Decanesulfonyl chloride, 3,3,4,4,5,5,6,6,7,7,8,8,9,9,10,10,10-heptadecafluoro-		CAS_RN: 27619-90-5	C(C(C(C(C(C(C(C(C(F)(F)F)(F)F)(F)F)(F)F)(F)F)(F)F)(F)F)(F)F)C[S](=O)(=O)Cl	O=S(=O)(Cl)CCC(F)(F)C(F)(F)C(F)(F)C(F)(F)C(F)(F)C(F)(F)C(F)(F)C(F)(F)F	C10H4ClF17O2S	-0.1404	2056.46	11.2406	12.8198	227.999	-268.466	2.91588	0	0	-55.5864	-2.87424	0	1.19632	TRUE	1	0
388	Hexanoic acid, 4,4,5,5,6,6,6-heptafluoro-2-methyl-, methyl ester		CAS_RN: 88021-93-6	COC(=O)C(C)CC(F)(F)C(F)(F)C(F)(F)F	COC(=O)C(C)CC(F)(F)C(F)(F)C(F)(F)F	C8H9F7O2	-4.0977	667.38	2.3811	11.5727	154.762	693.685	2.46973	0	-1.28921	19.3042	-1.9522	0	1.79795	FALSE	0	0
389	1,1,1,2,4,5,5,6,6,7,7,7-dodecafluoro-2,4-bis(trifluoromethyl)heptan-3-one		CAS_RN: 95639-15-9	FC(F)(F)C(F)(F)C(F)(F)C(F)(C(=O)C(F)(C(F)(F)F)C(F)(F)F)C(F)(F)F	O=C(C(F)(C(F)(F)F)C(F)(F)F)C(F)(C(F)(F)F)C(F)(F)C(F)(F)C(F)(F)F	C9F18O	-0.884	2438.88	10.7567	12.8339	246.929	-73.4027	2.93459	0	-6.02646	1.0449	0	0	1.42932	FALSE	0	0
390	1,1,1,2,2,3,3,4,4,5,5,6,6-Tridecafluoro-8-isocyanatooctane		CAS_RN: 142010-49-9	FC(F)(F)C(F)(F)C(F)(F)C(F)(F)C(F)(F)C(F)(F)CCN=C=O	O=C=NCCC(F)(F)C(F)(F)C(F)(F)C(F)(F)C(F)(F)C(F)(F)F	C9H4F13NO	-2.3827	1490.25	7.47342	12.4163	206.576	932.172	2.63295	0	0	-49.5173	-2.52927	0	1.33634	TRUE	1	0
391	Dodecafluoroheptanol		CAS_RN: 335-99-9	C(C(C(C(C(C(C(F)F)(F)F)(F)F)(F)F)(F)F)(F)F)O	OCC(F)(F)C(F)(F)C(F)(F)C(F)(F)C(F)(F)C(F)F	C7H4F12O	0.4293	1346.94	5.67624	12.2563	191.191	420.436	2.42036	7.7268	0	-79.5734	-3.10524	0	1.04542	TRUE	1	0
392	6-(Heptafluoropropyl)pyridin-3-amine		CAS_RN: 317810-57-4	Nc1ccc(nc1)C(F)(F)C(F)(F)C(F)(F)F	Nc1ccc(C(F)(F)C(F)(F)C(F)(F)F)nc1	C8H5F7N2	2.5984	633.75	2.3811	11.7832	193.023	582.574	2.43426	0	0	9.9103	0	0	1.45141	FALSE	0	0
393	1,1,1,2,2,3,3,4,4,5,5,6,6-Tridecafluoro-8,8-dimethoxyoctane		CAS_RN: 142502-76-9	COC(CC(F)(F)C(F)(F)C(F)(F)C(F)(F)C(F)(F)C(F)(F)F)OC	COC(CC(F)(F)C(F)(F)C(F)(F)C(F)(F)C(F)(F)C(F)(F)F)OC	C10H9F13O2	-4.0517	1559.5	7.47342	12.4659	175.717	834.858	2.7924	0	0	-40.1549	-2.54538	0	1.565	FALSE	0	0
394	1,1-Di-(4-methoxyphenyl)-1-[4-(1H,1H,2H,2H-perfluorodecyl)phenyl]methyl chloride		CAS_RN: 865758-36-7	COC1=CC=C(C=C1)C(Cl)(C1=CC=C(CCC(F)(F)C(F)(F)C(F)(F)C(F)(F)C(F)(F)C(F)(F)C(F)(F)C(F)(F)F)C=C1)C1=CC=C(OC)C=C1	COc1ccc(C(Cl)(c2ccc(CCC(F)(F)C(F)(F)C(F)(F)C(F)(F)C(F)(F)C(F)(F)C(F)(F)C(F)(F)F)cc2)c2ccc(OC)cc2)cc1	C31H22ClF17O2	0.0816	2318.89	10.5557	13.1944	204.116	2456.77	3.53666	0	0	76.2339	-2.53152	0	1.63604	FALSE	0	0
395	N-(2,4-Dimethylphenyl)-2,2,3,3,4,4,4-heptafluorobutanamide		CAS_RN: 90791-28-9	Cc1ccc(NC(=O)C(F)(F)C(F)(F)C(F)(F)F)c(C)c1	Cc1ccc(NC(=O)C(F)(F)C(F)(F)C(F)(F)F)c(C)c1	C12H10F7NO	0.2152	752.46	2.3811	11.9001	170.5	730.315	2.70205	0	-2.72521	38.7766	0	0	1.46096	FALSE	0	0
396	Hexafluoro-2,2,3,3-tetrachlorobutane		CAS_RN: 375-34-8	FC(F)(F)C(Cl)(Cl)C(Cl)(Cl)C(F)(F)F	FC(F)(F)C(Cl)(Cl)C(Cl)(Cl)C(F)(F)F	C4Cl4F6	-0.5133	189.19	3.96541	11.6883	177.044	28.1171	2.95146	0	0	57.4704	0	0	1.56869	FALSE	0	0
397	2-[(3,3,4,4,5,5,6,6,6-Nonafluorohexyl)sulfanyl]ethan-1-ol		CAS_RN: 104568-28-7	OCCSCCC(F)(F)C(F)(F)C(F)(F)C(F)(F)F	OCCSCCC(F)(F)C(F)(F)C(F)(F)C(F)(F)F	C8H9F9OS	0.783	853.7	3.96541	11.847	162.723	715.831	2.46911	8.3403	0	9.2742	-1.73306	0	1.25022	TRUE	1	0
398	3,3,4,4,5,5,6,6,7,7,8,8,9,9,9-Pentadecafluoro-2-methylnonan-2-ol		CAS_RN: 92914-88-0	CC(C)(O)C(F)(F)C(F)(F)C(F)(F)C(F)(F)C(F)(F)C(F)(F)C(F)(F)F	CC(C)(O)C(F)(F)C(F)(F)C(F)(F)C(F)(F)C(F)(F)C(F)(F)C(F)(F)F	C10H7F15O	0.1403	1912.5	11.2406	12.7263	197.621	782.687	2.63228	8.6782	0	-40.8502	0	0	0.807005	TRUE	1	0
399	3,3,4,4,5,5,6,6,6-Nonafluorohexyl trifluoromethanesulfonate		CAS_RN: 171182-86-8	FC(F)(F)C(F)(F)C(F)(F)C(F)(F)CCOS(=O)(=O)C(F)(F)F	O=S(=O)(OCCC(F)(F)C(F)(F)C(F)(F)C(F)(F)F)C(F)(F)F	C7H4F12O3S	-2.6726	961.55	3.71151	12.1068	179.322	279.873	2.67786	0	0	-8.1005	-2.8231	0	1.5372	FALSE	0	0
400	2,2-Difluoro-3-(nonafluorobutoxy)propanoic acid		CAS_RN: 824393-39-7	OC(=O)C(F)(F)COC(F)(F)C(F)(F)C(F)(F)C(F)(F)F	O=C(O)C(F)(F)COC(F)(F)C(F)(F)C(F)(F)C(F)(F)F	C7H3F11O3	-0.7399	943.4	4.32964	12.0205	202.704	132.037	2.44891	7.7395	-3.14889	-35.9259	-3.05669	1	0.968648	TRUE	1	0
401	4,4,5,5,6,6,6-Heptafluorohexan-2-yl acetate		CAS_RN: 136909-75-6	CC(CC(F)(F)C(F)(F)C(F)(F)F)OC(C)=O	CC(=O)OC(C)CC(F)(F)C(F)(F)C(F)(F)F	C8H9F7O2	-4.0977	654.29	2.3811	11.5369	146.023	301.88	2.16892	0	-1.0522	8.2787	-1.91757	0	1.85034	FALSE	0	0
402	multiple H-substituted, multiple ether-substituted perfluoroalkyl alcohols, n=5, m=8		NA	FC(F)(F)C(F)(F)C(F)(F)C(F)(F)C(F)(F)C(F)(F)C(F)(F)C(F)(F)C(F)(F)C(F)(F)CCOCCOCCOCCOCCOCCOCCOCCO[H]	OCCOCCOCCOCCOCCOCCOCCOCCC(F)(F)C(F)(F)C(F)(F)C(F)(F)C(F)(F)C(F)(F)C(F)(F)C(F)(F)C(F)(F)C(F)(F)F	C26H33F21O8	-3.9659	2863.63	15.1596	13.0934	153.293	4344.67	3.42494	8.5138	0	-62.541	-2.84409	0	2.14484	FALSE	0	0
403	2,2,3,3,4,4,5,5,6,6,7,7,8,8,9,9,9-Heptadecafluorononyl acrylate		CAS_RN: 307-87-9	FC(F)(F)C(F)(F)C(F)(F)C(F)(F)C(F)(F)C(F)(F)C(F)(F)C(F)(F)COC(=O)C=C	C=CC(=O)OCC(F)(F)C(F)(F)C(F)(F)C(F)(F)C(F)(F)C(F)(F)C(F)(F)C(F)(F)F	C12H5F17O2	-1.9562	2086	11.2406	12.8001	221.24	697.088	2.90284	0	-2.09052	-75.5023	-3.28056	0	1.25432	TRUE	1	0
404	Bis(2-{ethyl[(perfluorooctyl)sulfonyl]amino}ethyl) hydrogen phosphate	diSAmPAP	CAS_RN: 2965-52-8	C(F)(F)(F)C(F)(F)C(F)(F)C(F)(F)C(F)(F)C(F)(F)C(F)(F)C(F)(F)[S](=O)(=O)N(CC)CCO[P](=O)(OCCN(CC)[S](C(C(C(C(C(C(C(C(F)(F)F)(F)F)(F)F)(F)F)(F)F)(F)F)(F)F)(F)F)(=O)=O)O[H]	CCN(CCOP(=O)(O)OCCN(CC)S(=O)(=O)C(F)(F)C(F)(F)C(F)(F)C(F)(F)C(F)(F)C(F)(F)C(F)(F)C(F)(F)F)S(=O)(=O)C(F)(F)C(F)(F)C(F)(F)C(F)(F)C(F)(F)C(F)(F)C(F)(F)C(F)(F)F	C24H19F34N2O8PS2	-2.1435	4838.18	16.4324	13.7138	187.981	2001.7	3.71228	9.6702	0	-115.448	-2.32568	1	1.35844	TRUE	1	1
405	1,1,1,2,2,3,3,4,4,7,7,7-Dodecafluoro-6-iodoheptane		CAS_RN: 935553-88-1	FC(F)(F)C(I)CC(F)(F)C(F)(F)C(F)(F)C(F)(F)F	FC(F)(F)C(I)CC(F)(F)C(F)(F)C(F)(F)C(F)(F)F	C7H3F12I	-1.2448	907.87	4.32964	12.0275	223.154	-3187.71	2.47842	0	0	17.4387	-2.79922	0	1.95841	FALSE	0	0
406	(Perfluorododecyl)ethylene		CAS_RN: 67103-05-3	C=CC(C(C(C(C(C(C(C(C(C(C(C(F)(F)F)(F)F)(F)F)(F)F)(F)F)(F)F)(F)F)(F)F)(F)F)(F)F)(F)F)(F)F	C=CC(F)(F)C(F)(F)C(F)(F)C(F)(F)C(F)(F)C(F)(F)C(F)(F)C(F)(F)C(F)(F)C(F)(F)C(F)(F)C(F)(F)F	C14H3F25	-0.7116	3208.5	19.1782	13.2472	230.755	632.331	3.13037	0	0	-141.969	0	0	1.18374	TRUE	1	0
407	4-Bromo-3-(heptafluoropropyl)-5-phenyl-1H-pyrazole		CAS_RN: 82633-52-1	FC(F)(F)C(F)(F)C(F)(F)c1nNc(c1Br):c1ccccc1	FC(F)(F)C(F)(F)C(F)(F)c1n[nH]c(-c2ccccc2)c1Br	C12H6BrF7N2	1.6892	671.4	2.3811	12.1794	237.096	1005.96	2.66655	0	0	39.1041	0	0	1.41021	FALSE	0	0
408	Perfluoro-15-crown-5-ether		CAS_RN: 97571-69-2	FC1(F)OC(F)(F)C(F)(F)OC(F)(F)C(F)(F)OC(F)(F)C(F)(F)OC(F)(F)C(F)(F)OC1(F)F	FC1(F)OC(F)(F)C(F)(F)OC(F)(F)C(F)(F)OC(F)(F)C(F)(F)OC(F)(F)C(F)(F)OC1(F)F	C10F20O5	-4.1881	1731.56	12.6578	12.784	227.556	78.283	2.8868	0	0	-61.5388	0	0	1.4007	FALSE	0	0
409	perfluoroalkanesulfonamido quaternary ammonium, n=3		NA	S(NCCC[N+](C)(C)C)(=O)(=O)C(F)(F)C(F)(F)C(F)(F)F	C[N+](C)(C)CCCNS(=O)(=O)C(F)(F)C(F)(F)C(F)(F)F	C9H16F7N2O2S	-4.7439	872.79	2.3811	11.9223	135.485	1271.81	2.46683	0	0	22.8765	-0.613342	0	1.96544	FALSE	0	0
410	1-Nonanesulfonyl chloride, 3,3,4,4,5,5,6,6,7,7,8,8,9,9,9-pentadecafluoro-		CAS_RN: 27607-61-0	C([S](Cl)(=O)=O)CC(F)(F)C(F)(F)C(F)(F)C(F)(F)C(F)(F)C(F)(F)C(F)(F)F	O=S(=O)(Cl)CCC(F)(F)C(F)(F)C(F)(F)C(F)(F)C(F)(F)C(F)(F)C(F)(F)F	C9H4ClF15O2S	-0.1529	1758.9	9.33326	12.6593	225.221	-290.247	2.79428	0	0	-42.7379	-2.76257	0	1.20533	TRUE	1	0
411	2-Chloro-4,6-bis[(4,4,5,5,6,6,7,7,8,8,9,9,9-tridecafluorononyl)oxy]-1,3,5-triazine		CAS_RN: 916770-15-5	FC(F)(F)C(F)(F)C(F)(F)C(F)(F)C(F)(F)C(F)(F)CCCOC1=NC(OCCCC(F)(F)C(F)(F)C(F)(F)C(F)(F)C(F)(F)C(F)(F)F)=NC(Cl)=N1	FC(F)(F)C(F)(F)C(F)(F)C(F)(F)C(F)(F)C(F)(F)CCCOc1nc(Cl)nc(OCCCC(F)(F)C(F)(F)C(F)(F)C(F)(F)C(F)(F)C(F)(F)F)n1	C21H12ClF26N3O2	-2.488	3009.62	10.3112	13.1949	202.604	3103.87	3.41568	0	0	-41.2895	-2.70371	0	1.73402	FALSE	0	0
412	N-ethyl perfluoroheptanesulfonamido polyethylene glycol, n=7, m=3		NA	OCCOCCOCCOCCN(CC)S(=O)(=O)C(F)(F)C(F)(F)C(F)(F)C(F)(F)C(F)(F)C(F)(F)C(F)(F)F	CCN(CCOCCOCCOCCO)S(=O)(=O)C(F)(F)C(F)(F)C(F)(F)C(F)(F)C(F)(F)C(F)(F)C(F)(F)F	C17H22F15NO6S	-3.3284	2153.16	9.33326	12.8835	159.318	3244.18	3.28733	8.4633	0	-39.0572	-1.30084	0	1.69394	FALSE	0	0
413	Octafluorotetrahydrothiophene 1,1-dioxide		CAS_RN: 42060-64-0	O=[S]1(C(C(C(C1(F)F)(F)F)(F)F)(F)F)=O	O=S1(=O)C(F)(F)C(F)(F)C(F)(F)C1(F)F	C4F8O2S	0.3791	1216	4.24264	12.5212	0	28.3474	1.58175	0	0	-43.2454	0	0	2.86569	FALSE	0	0
414	Perfluorotriethylamine		CAS_RN: 359-70-6	FC(F)(F)C(F)(F)N(C(F)(F)C(F)(F)F)C(F)(F)C(F)(F)F	FC(F)(F)C(F)(F)N(C(F)(F)C(F)(F)F)C(F)(F)C(F)(F)F	C6F15N	-3.7406	1072.69	6.37712	12.3736	209.305	44.1693	2.65965	0	0	-19.7188	0	0	1.44153	FALSE	0	0
415	double bond perfluoroalkyl (linear) sulfonic aicds, n=2		NA	F/C(C(F)(F)C(F)(F)S(=O)(O)=O)=C(F)C(F)(F)F	O=S(=O)(O)C(F)(F)C(F)(F)C(F)=C(F)C(F)(F)F	C5HF9O3S	1.3252	909.95	1.31037	11.8635	223.823	83.2918	2.03833	7.8119	-4.32627	-41.1264	0	1	0.99962	TRUE	1	0
416	Sodium [[[(tridecafluorohexyl)sulphonyl]amino]methyl]benzenesulphonate		CAS_RN: 68299-21-8	[Na+].[O-]S(=O)(=O)c1ccccc1CNS(=O)(=O)C(F)(F)C(F)(F)C(F)(F)C(F)(F)C(F)(F)C(F)(F)F	O=S(=O)(O)c1ccccc1CNS(=O)(=O)C(F)(F)C(F)(F)C(F)(F)C(F)(F)C(F)(F)C(F)(F)F	C13H8F13NO5S2	1.7235	1853.49	7.47342	12.802	198.54	885.254	3.14004	9.0682	0	13.1659	-1.71196	1	0.809102	TRUE	1	0
417	N'-[(2Z)-5,5,6,6,7,7,7-Heptafluoro-4-oxohept-2-en-2-yl]benzohydrazide		CAS_RN: 203200-76-4	CC(NNC(=O)c1ccccc1)=CC(=O)C(F)(F)C(F)(F)C(F)(F)F	CC(=CC(=O)C(F)(F)C(F)(F)C(F)(F)F)NNC(=O)c1ccccc1	C14H11F7N2O2	1.1875	815.32	2.3811	11.888	183.88	951.011	2.72794	0	-2.76964	29.1131	0	0	1.40372	FALSE	0	0
418	Bis(perfluoro(1-[(3,6-dimethyl-1,4-dioxan-2-yl)oxy]ethyl)) ketone		CAS_RN: 61097-96-9	FC(F)(F)C(F)(OC1(F)OC(F)(C(F)(F)F)C(F)(F)OC1(F)C(F)(F)F)C(=O)C(F)(OC1(F)OC(F)(C(F)(F)F)C(F)(F)OC1(F)C(F)(F)F)C(F)(F)F	O=C(C(F)(OC1(F)OC(F)(C(F)(F)F)C(F)(F)OC1(F)C(F)(F)F)C(F)(F)F)C(F)(OC1(F)OC(F)(C(F)(F)F)C(F)(F)OC1(F)C(F)(F)F)C(F)(F)F	C17F30O7	-2.6553	3352.31	25.3504	13.6321	253.829	7.22903	3.53787	0	-6.52046	31.8718	0	0	1.7908	FALSE	0	0
419	1H,1H,2H,2H-Perfluorotetradecyltriethoxysilane		CAS_RN: 885275-56-9	CCO[Si](CCC(F)(F)C(F)(F)C(F)(F)C(F)(F)C(F)(F)C(F)(F)C(F)(F)C(F)(F)C(F)(F)C(F)(F)C(F)(F)C(F)(F)F)(OCC)OCC	CCO[Si](CCC(F)(F)C(F)(F)C(F)(F)C(F)(F)C(F)(F)C(F)(F)C(F)(F)C(F)(F)C(F)(F)C(F)(F)C(F)(F)C(F)(F)F)(OCC)OCC	C20H19F25O3Si	-1.6981	3357.73	19.1782	13.3364	195.993	2571.99	3.32207	0	0	-56.7815	-2.91165	0	1.61607	FALSE	0	0
420	Ethyl [3-(heptafluoropropyl)-1-methyl-1H-pyrazol-5-yl]acetate		CAS_RN: 1428569-18-9	CCOC(=O)Cc1cc(nn1C)C(F)(F)C(F)(F)C(F)(F)F	CCOC(=O)Cc1cc(C(F)(F)C(F)(F)C(F)(F)F)nn1C	C11H11F7N2O2	-3.7902	727.24	2.3811	12.0331	174.273	817.109	2.65924	0	-0.858382	5.5396	-0.592253	0	1.59479	FALSE	0	0
421	1-Bromo-3-(heptadecafluorooctyl)benzene		CAS_RN: 325459-90-3	FC(F)(F)C(F)(F)C(F)(F)C(F)(F)C(F)(F)C(F)(F)C(F)(F)C(F)(F)C1=CC(Br)=CC=C1	FC(F)(F)C(F)(F)C(F)(F)C(F)(F)C(F)(F)C(F)(F)C(F)(F)C(F)(F)c1cccc(Br)c1	C14H4BrF17	0	2094.36	11.2406	12.9085	239.763	-1272.17	3.13316	0	0	-14.8039	0	0	1.29215	TRUE	1	0
422	N-Ethylperfluorooctanesulfonamide	N-EtFOSA	CAS_RN: 4151-50-2	FC(F)(C(F)(F)C(F)(F)C(F)(F)C(F)(F)C(F)(F)C(F)(F)C(F)(F)F)S(=O)(=O)NCC	CCNS(=O)(=O)C(F)(F)C(F)(F)C(F)(F)C(F)(F)C(F)(F)C(F)(F)C(F)(F)C(F)(F)F	C10H6F17NO2S	-0.4834	2278.56	11.2406	12.9166	213.665	1499.83	3.04333	0	0	-80.7376	-1.2655	0	1.15304	TRUE	1	1
423	Methyl 3-(heptadecafluorooctyl)benzoate		CAS_RN: 80791-11-3	COC(=O)C1=CC(=CC=C1)C(F)(F)C(F)(F)C(F)(F)C(F)(F)C(F)(F)C(F)(F)C(F)(F)C(F)(F)F	COC(=O)c1cccc(C(F)(F)C(F)(F)C(F)(F)C(F)(F)C(F)(F)C(F)(F)C(F)(F)C(F)(F)F)c1	C16H7F17O2	-0.7999	2190.42	11.2406	12.9516	228.665	1316.63	3.11235	0	-1.60776	-9.6728	0	0	1.15927	TRUE	1	0
424	Ammonium nonadecafluorononanesulphonate		CAS_RN: 17202-41-4	[NH4+].[O-]S(=O)(=O)C(F)(F)C(F)(F)C(F)(F)C(F)(F)C(F)(F)C(F)(F)C(F)(F)C(F)(F)C(F)(F)F	O=S(=O)(O)C(F)(F)C(F)(F)C(F)(F)C(F)(F)C(F)(F)C(F)(F)C(F)(F)C(F)(F)C(F)(F)F	C9HF19O3S	0.7318	2545.65	13.1851	13.0083	235.547	93.9171	2.91356	7.8306	0	-108.019	0	1	0.514094	TRUE	1	0
425	n:2 fluorotelomer thio alkyl amido ammonium, n=6		NA	FC(F)(F)C(F)(F)C(F)(F)C(F)(F)C(F)(F)C(F)(F)C(F)(F)C(F)(F)C(F)(F)C(F)(F)C(F)(F)C(F)(F)CCSCC(NCCCN(C)C)=O	CN(C)CCCNC(=O)CSCCC(F)(F)C(F)(F)C(F)(F)C(F)(F)C(F)(F)C(F)(F)C(F)(F)C(F)(F)C(F)(F)C(F)(F)C(F)(F)C(F)(F)F	C21H19F25N2OS	-1.2501	3342.09	19.1782	13.2882	191.858	3077.54	3.47811	0	-0.918531	-72.7297	-2.73422	0	1.6772	FALSE	0	0
426	3,6,9,12,15,18,21,24-Octaoxaheptacosanoyl fluoride, 2,4,4,5,7,7,8,10,10,11,13,13,14,16,16,17,19,19,20,22,22,23,25,25,26,26,27,27,27-nonacosafluoro-2,5,8,11,14,17,20,23-octakis(trifluoromethyl)-		CAS_RN: 13140-26-6	FC(=O)C(F)(OC(F)(F)C(F)(OC(F)(F)C(F)(OC(F)(F)C(F)(OC(F)(F)C(F)(OC(F)(F)C(F)(OC(F)(F)C(F)(OC(F)(F)C(F)(OC(F)(F)C(F)(F)C(F)(F)F)C(F)(F)F)C(F)(F)F)C(F)(F)F)C(F)(F)F)C(F)(F)F)C(F)(F)F)C(F)(F)F)C(F)(F)F	O=C(F)C(F)(OC(F)(F)C(F)(OC(F)(F)C(F)(OC(F)(F)C(F)(OC(F)(F)C(F)(OC(F)(F)C(F)(OC(F)(F)C(F)(OC(F)(F)C(F)(OC(F)(F)C(F)(F)C(F)(F)F)C(F)(F)F)C(F)(F)F)C(F)(F)F)C(F)(F)F)C(F)(F)F)C(F)(F)F)C(F)(F)F)C(F)(F)F	C27F54O9	-2.8876	6122.69	0	13.9264	248.673	-3.83621	3.72537	0	-5.49029	-52.1415	0	0	1.85121	FALSE	0	0
427	Perfluoro-14-iodo-2-(methyl)tetradecane		CAS_RN: 3248-63-3	FC(I)(F)C(F)(F)C(F)(F)C(F)(F)C(F)(F)C(F)(F)C(F)(F)C(F)(F)C(F)(F)C(F)(F)C(F)(F)C(F)(F)C(F)(C(F)(F)F)C(F)(F)F	FC(F)(F)C(F)(C(F)(F)F)C(F)(F)C(F)(F)C(F)(F)C(F)(F)C(F)(F)C(F)(F)C(F)(F)C(F)(F)C(F)(F)C(F)(F)C(F)(F)C(F)(F)I	C15F31I	-0.4488	4556.87	25.8059	13.5172	249.481	-150.218	3.41171	0	0	-161.856	0	0	1.43403	FALSE	0	0
428	Hexafluoroglutaric acid	HF2CA	CAS_RN: 376-73-8	OC(=O)C(F)(F)C(F)(F)C(F)(F)C(O)=O	O=C(O)C(F)(F)C(F)(F)C(F)(F)C(=O)O	C5H2F6O4	4.7761	795.11	2.3811	11.6895	183.499	180.396	1.73407	7.5657	-3.54775	-44.2378	0	2	1.4361	FALSE	0	0
429	Perfluorohept-1-ene		CAS_RN: 355-63-5	FC(F)=C(F)C(F)(F)C(F)(F)C(F)(F)C(F)(F)C(F)(F)F	FC(F)=C(F)C(F)(F)C(F)(F)C(F)(F)C(F)(F)C(F)(F)F	C7F14	-1.1757	1459.06	5.67624	12.2935	232.189	-10.8497	2.3893	0	-4.56468	-75.9528	0	0	1.27094	TRUE	1	0
430	Tris[3-(3,3,4,4,5,5,6,6,7,7,8,8,9,9,10,10,10-heptadecafluorodecyl)phenyl]phosphane		CAS_RN: 342889-38-7	FC(F)(F)C(F)(F)C(F)(F)C(F)(F)C(F)(F)C(F)(F)C(F)(F)C(F)(F)CCC1=CC(=CC=C1)P(C1=CC=CC(CCC(F)(F)C(F)(F)C(F)(F)C(F)(F)C(F)(F)C(F)(F)C(F)(F)C(F)(F)F)=C1)C1=CC=CC(CCC(F)(F)C(F)(F)C(F)(F)C(F)(F)C(F)(F)C(F)(F)C(F)(F)C(F)(F)F)=C1	FC(F)(F)C(F)(F)C(F)(F)C(F)(F)C(F)(F)C(F)(F)C(F)(F)C(F)(F)CCc1cccc(P(c2cccc(CCC(F)(F)C(F)(F)C(F)(F)C(F)(F)C(F)(F)C(F)(F)C(F)(F)C(F)(F)F)c2)c2cccc(CCC(F)(F)C(F)(F)C(F)(F)C(F)(F)C(F)(F)C(F)(F)C(F)(F)C(F)(F)F)c2)c1	C48H24F51P	0.9043	6342.53	0	14.0168	221.785	3841.5	3.79943	0	0	63.085	-3.30854	0	2.3127	FALSE	0	0
431	1-Propanaminium, 2-hydroxy-N,N,N-trimethyl-, 3-[(.gamma.-.omega.-perfluoro-C6-20-alkyl)thio] derivs., chlorides		CAS_RN: 70983-60-7	CN(C)CC(O)SC(F)(F)C(F)(F)C(F)(F)C(F)(F)C(F)(F)C(F)(F)F	CN(C)CC(O)SC(F)(F)C(F)(F)C(F)(F)C(F)(F)C(F)(F)C(F)(F)F	C10H10F13NOS	-1.272	1535.77	7.47342	12.4756	185.161	942.479	2.78663	9.1553	0	-31.9836	-0.760166	0	0.966412	TRUE	1	0
432	(Tridecafluorohexyl)benzene		CAS_RN: 65440-93-9	FC(F)(F)C(F)(F)C(F)(F)C(F)(F)C(F)(F)C(F)(F)C1=CC=CC=C1	FC(F)(F)C(F)(F)C(F)(F)C(F)(F)C(F)(F)C(F)(F)c1ccccc1	C12H5F13	0	1505.04	7.47342	12.5572	217.946	1364.8	2.61918	0	0	2.4729	0	0	1.25009	TRUE	1	0
433	6:2 Fluorotelomer methacrylate		CAS_RN: 2144-53-8	C(C(C(C(C(C(C(F)(F)F)(F)F)(F)F)(F)F)(F)F)(F)F)COC(C(C)=C)=O	C=C(C)C(=O)OCCC(F)(F)C(F)(F)C(F)(F)C(F)(F)C(F)(F)C(F)(F)F	C12H9F13O2	-2.4082	1568	7.47342	12.4597	200.402	1164.2	2.82522	0	-1.47703	-20.5275	-2.59496	0	1.33606	TRUE	1	0
434	1 OH-substituted n:2 fluorotelomer sulfonic acids, n=5		NA	FC(F)(F)C(F)(F)C(F)(F)C(F)(F)C(F)(F)CC(O)S(=O)(O)=O	O=S(=O)(O)C(O)CC(F)(F)C(F)(F)C(F)(F)C(F)(F)C(F)(F)F	C7H5F11O4S	2.5278	1294.03	5.67624	12.3073	197.537	-252.529	2.57114	8.473	0	-16.5195	-3.20959	1	1.04393	TRUE	1	0
435	perfluoroalkanesulfonamido quaternary ammonium dicarboxylate B, n=6		NA	S(N(CCC(O)=O)CCC[N+](CC(O)=O)(C)C)(=O)(=O)C(F)(F)C(F)(F)C(F)(F)C(F)(F)C(F)(F)C(F)(F)F	C[N+](C)(CCCN(CCC(=O)O)S(=O)(=O)C(F)(F)C(F)(F)C(F)(F)C(F)(F)C(F)(F)C(F)(F)F)CC(=O)O	C16H19F13N2O6S	-2.3398	1979.12	7.47342	12.8132	165.219	1581.57	3.26953	8.7594	-1.95875	-2.9771	-1.6322	2	1.22016	TRUE	1	0
436	1-{4-[(2H-1,3-Benzodioxol-5-yl)methyl]piperazin-1-yl}-2,2,3,3,4,4,4-heptafluorobutan-1-one		CAS_RN: 546063-97-2	FC(F)(F)C(F)(F)C(F)(F)C(=O)N1CCN(Cc2ccc3OCOc3c2)CC1	O=C(N1CCN(Cc2ccc3c(c2)OCO3)CC1)C(F)(F)C(F)(F)C(F)(F)F	C16H15F7N2O3	-2.7522	843.83	2.3811	12.2555	158.062	1007.9	2.86758	0	-2.53004	47.7315	-0.39592	0	1.62177	FALSE	0	0
437	((Perfluorooctyl)ethyl)phosphonic acid		CAS_RN: 80220-63-9	OP(O)(=O)CCC(F)(F)C(F)(F)C(F)(F)C(F)(F)C(F)(F)C(F)(F)C(F)(F)C(F)(F)F	O=P(O)(O)CCC(F)(F)C(F)(F)C(F)(F)C(F)(F)C(F)(F)C(F)(F)C(F)(F)C(F)(F)F	C10H6F17O3P	1.9276	2076.13	11.2406	12.8198	210.315	307.351	2.89955	8.3227	0	-54.5027	-3.10126	2	0.929296	TRUE	1	0
438	3,3,4,4,5,6,6,6-Octafluoro-5-(trifluoromethyl)hexan-1-ol		CAS_RN: 89076-11-9	OCCC(F)(F)C(F)(F)C(F)(C(F)(F)F)C(F)(F)F	OCCC(F)(F)C(F)(F)C(F)(C(F)(F)F)C(F)(F)F	C7H5F11O	0.1638	1789.38	6.08364	12.2392	178.953	858.977	2.18838	7.9383	0	4.5343	-2.47438	0	1.12891	TRUE	1	0
439	2-{[4-(Heptafluoropropyl)phenyl]methyl}oxirane		CAS_RN: 144006-68-8	FC(F)(F)C(F)(F)C(F)(F)C1=CC=C(CC2CO2)C=C1	FC(F)(F)C(F)(F)C(F)(F)c1ccc(CC2CO2)cc1	C12H9F7O	0.1643	667.92	2.3811	11.9674	176.326	1039.82	2.61918	0	0	49.1486	0.404281	0	1.53591	FALSE	0	0
440	Perfluorododecanesulfonic acid (PFDOS)	PFDoS	CAS_RN: 79780-39-5	O=[S](=O)(O)C(F)(F)C(F)(F)C(F)(F)C(F)(F)C(F)(F)C(F)(F)C(F)(F)C(F)(F)C(F)(F)C(F)(F)C(F)(F)C(F)(F)F	O=S(=O)(O)C(F)(F)C(F)(F)C(F)(F)C(F)(F)C(F)(F)C(F)(F)C(F)(F)C(F)(F)C(F)(F)C(F)(F)C(F)(F)C(F)(F)F	C12HF25O3S	0.576	3438.34	19.1782	13.3221	239.001	93.9239	3.23567	7.859	0	-147.474	0	1	0.731509	TRUE	1	1
441	3-((Perfluoropentylsulfonyl)amino)-N,N,N-trimethylpropanaminium chloride		CAS_RN: 68957-55-1	[Cl-].[H]N(CCC[N+](C)(C)C)S(=O)(=O)C(F)(F)C(F)(F)C(F)(F)C(F)(F)C(F)(F)F	C[N+](C)(C)CCCNS(=O)(=O)C(F)(F)C(F)(F)C(F)(F)C(F)(F)C(F)(F)F	C11H16F11N2O2S	-3.7227	1474.16	5.67624	12.4643	158.938	1911.92	2.93268	0	0	-2.3885	-0.915547	0	1.69689	FALSE	0	0
442	1-Ethoxy-3,3,4,4,5,5,6,6,6-nonafluorohexan-2-ol		CAS_RN: 89807-88-5	CCOCC(O)C(F)(F)C(F)(F)C(F)(F)C(F)(F)F	CCOCC(O)C(F)(F)C(F)(F)C(F)(F)C(F)(F)F	C8H9F9O2	-2.1619	1007.46	3.96541	11.9713	157.865	1468.51	2.42044	8.6171	0	-10.2862	-1.52081	0	1.39273	FALSE	0	0
443	1,1,1,2,2,3,3,4,4,5,5,6,6,7,7,8,8,9,9,10,10-Henicosafluoro-12-iodohenicosane		CAS_RN: 129838-42-2	CCCCCCCCCC(I)CC(F)(F)C(F)(F)C(F)(F)C(F)(F)C(F)(F)C(F)(F)C(F)(F)C(F)(F)C(F)(F)C(F)(F)F	CCCCCCCCCC(I)CC(F)(F)C(F)(F)C(F)(F)C(F)(F)C(F)(F)C(F)(F)C(F)(F)C(F)(F)C(F)(F)C(F)(F)F	C21H22F21I	-0.8201	2728.43	15.1596	13.0885	181.743	1061.69	3.41601	0	0	-9.9584	-2.41	0	1.33714	TRUE	1	0
444	Methyl Perfluorononanoate		CAS_RN: 51502-45-5	COC(=O)C(F)(F)C(F)(F)C(F)(F)C(F)(F)C(F)(F)C(F)(F)C(F)(F)C(F)(F)F	COC(=O)C(F)(F)C(F)(F)C(F)(F)C(F)(F)C(F)(F)C(F)(F)C(F)(F)C(F)(F)F	C10H3F17O2	-2.0927	2149.38	11.2406	12.824	221.28	363.375	2.79839	0	-3.79753	-93.9133	0	0	1.16937	TRUE	1	0
445	4-[(3,3,4,4,5,5,6,6,7,7,8,8,8-Tridecafluorooctyl)sulfanyl]phenol		CAS_RN: 892155-19-0	OC1=CC=C(SCCC(F)(F)C(F)(F)C(F)(F)C(F)(F)C(F)(F)C(F)(F)F)C=C1	Oc1ccc(SCCC(F)(F)C(F)(F)C(F)(F)C(F)(F)C(F)(F)C(F)(F)F)cc1	C14H9F13OS	1.9935	1485.85	7.47342	12.5123	196.034	446.787	2.89165	9.0155	0	24.2202	-2.13736	0	1.01776	TRUE	1	0
446	1,1,1,2,2,3,3,4,4,5,5,6,6,7,7,8,8,11,11,12,12,13,13,14,14,14-Hexacosafluorotetradecane		CAS_RN: 53638-09-8	FC(F)(F)C(F)(F)C(F)(F)C(F)(F)CCC(F)(F)C(F)(F)C(F)(F)C(F)(F)C(F)(F)C(F)(F)C(F)(F)C(F)(F)F	FC(F)(F)C(F)(F)C(F)(F)C(F)(F)CCC(F)(F)C(F)(F)C(F)(F)C(F)(F)C(F)(F)C(F)(F)C(F)(F)C(F)(F)F	C14H4F26	-0.7456	2854.88	16.1929	13.1199	211.03	972.053	3.19322	0	0	-94.4161	-4.35826	0	1.45908	FALSE	0	0
447	1-[3-Methylidene-4-(2,2,3,3,4,4,5,5,5-nonafluoropentyl)pyrrolidin-1-yl]ethan-1-one		CAS_RN: 31164-13-3	CC(=O)N1CC(CC(F)(F)C(F)(F)C(F)(F)C(F)(F)F)C(=C)C1	C=C1CN(C(C)=O)CC1CC(F)(F)C(F)(F)C(F)(F)C(F)(F)F	C12H12F9NO	-2.0848	985.04	3.96541	12.1989	151.912	596.052	2.66883	0	-0.593196	27.6466	-1.97789	0	1.58214	FALSE	0	0
448	2-(4,4,5,5,6,6,6-heptafluorohexyl)propanedioic Acid		CAS_RN: 244022-64-8	OC(=O)C(CCCC(F)(F)C(F)(F)C(F)(F)F)C(O)=O	O=C(O)C(CCCC(F)(F)C(F)(F)C(F)(F)F)C(=O)O	C9H9F7O4	1.4	835.08	2.3811	11.61	142.985	953.43	2.54129	8.3657	-1.89963	26.683	-1.98951	2	1.44165	FALSE	0	0
449	1-(Heptafluoropropyl)-4-iodobenzene		CAS_RN: 1417885-93-8	FC(F)(F)C(F)(F)C(F)(F)c1ccc(I)cc1	FC(F)(F)C(F)(F)C(F)(F)c1ccc(I)cc1	C9H4F7I	0	614.84	2.3811	11.7832	211.34	-3186.64	2.56102	0	0	47.3814	0	0	1.96365	FALSE	0	0
450	19-Bromo-1,1,1,2,2,3,3,4,4,5,5,6,6,7,7,8,8-heptadecafluorononadecane		CAS_RN: 1597-70-2	FC(F)(F)C(F)(F)C(F)(F)C(F)(F)C(F)(F)C(F)(F)C(F)(F)C(F)(F)CCCCCCCCCCCBr	FC(F)(F)C(F)(F)C(F)(F)C(F)(F)C(F)(F)C(F)(F)C(F)(F)C(F)(F)CCCCCCCCCCCBr	C19H22BrF17	-0.9932	2134.73	11.2406	12.8044	163.381	4148.3	3.33204	0	0	-2.2249	-2.32402	0	2.0387	FALSE	0	0
451	2-(2-Bromo-1,1,2,2-tetrafluoroethoxy)-1,1,1,2,3,3-hexafluoro-3-(pentafluoroethoxy)propane		CAS_RN: 1482416-44-3	FC(F)(F)C(F)(F)OC(F)(F)C(F)(OC(F)(F)C(F)(F)Br)C(F)(F)F	FC(F)(F)C(F)(F)OC(F)(F)C(F)(OC(F)(F)C(F)(F)Br)C(F)(F)F	C7BrF15O2	-3.1282	1068.33	7.41337	12.3405	247.953	99.6649	2.76305	0	0	-40.5042	0	0	1.38964	FALSE	0	0
452	Methyl tetrafluoro-2-(trifluoromethyl)propionate		CAS_RN: 680-05-7	COC(=O)C(F)(C(F)(F)F)C(F)(F)F	COC(=O)C(F)(C(F)(F)F)C(F)(F)F	C5H3F7O2	-4.8303	1125.75	2.3811	11.5978	170.262	157.861	1.58175	0	-3.04398	19.162	0	0	1.86669	FALSE	0	0
453	di Cl-substituted perfluoroalkyl (linear) sulfonic acids, C8		NA	FC(F)(C(F)(F)C(S(=O)(O)=O)(F)F)C(Cl)(F)C(C(F)(F)C(Cl)(F)C(F)(F)F)(F)F	O=S(=O)(O)C(F)(F)C(F)(F)C(F)(F)C(F)(Cl)C(F)(F)C(F)(F)C(F)(Cl)C(F)(F)F	C8HCl2F15O3S	0.8857	1903.73	11.2406	12.8772	258.463	58.2775	3.12521	8.0188	0	-75.8361	0	1	0.678677	TRUE	1	0
454	Ytterbium, tris[3-[2,2,3,3,4,4,4-heptafluoro-1-(oxo-βO)butyl]-1,7,7-trimethylbicyclo[2.2.1]heptan-2-onato-βO]-		CAS_RN: 80464-74-0	[Yb+3].CC1(C)C2CCC1(C)C(=O)[C-]2C(=O)C(F)(F)C(F)(F)C(F)(F)F.CC1(C)C2CCC1(C)C(=O)[C-]2C(=O)C(F)(F)C(F)(F)C(F)(F)F.CC1(C)C2CCC1(C)C(=O)[C-]2C(=O)C(F)(F)C(F)(F)C(F)(F)F	CC12CCC(C(C(=O)C(F)(F)C(F)(F)C(F)(F)F)C1=O)C2(C)C	C14H15F7O2	1.47	965.08	3.58147	12.7176	118.933	857.373	2.86124	0	-2.63303	88.8702	0.152099	0	1.82027	FALSE	0	0
455	1-(Perfluorofluorooctyl)propane-2,3-diol		CAS_RN: 94159-84-9	OCC(O)CC(F)(F)C(F)(F)C(F)(F)C(F)(F)C(F)(F)C(F)(F)C(F)(F)C(F)(F)F	OCC(O)CC(F)(F)C(F)(F)C(F)(F)C(F)(F)C(F)(F)C(F)(F)C(F)(F)C(F)(F)F	C11H7F17O2	1.6008	2156	11.2406	12.8058	201.381	1540.93	2.85301	8.5227	0	-58.3894	-3.06662	0	1.04236	TRUE	1	0
456	Butyl 2,3,3,3-tetrafluoro-2-(heptafluoropropoxy)propanoate		CAS_RN: 147224-18-8	CCCCOC(=O)C(F)(OC(F)(F)C(F)(F)C(F)(F)F)C(F)(F)F	CCCCOC(=O)C(F)(OC(F)(F)C(F)(F)C(F)(F)F)C(F)(F)F	C10H9F11O3	-4.1395	1059.33	4.5088	12.1321	200.967	2453.3	2.70885	0	-3.23509	31.5419	-0.942779	0	1.75819	FALSE	0	0
457	1,1,1,2,2,3,3,5,6,6,8,9,9,11,12,14,14,15,17,17,18,20,20,21,21,22,22,22-Octacosafluoro-5,8,11,12,15,18-hexakis(trifluoromethyl)-4,7,10,13,16,19-hexaoxadocosane		CAS_RN: 61098-01-9	FC(F)(F)C(F)(F)C(F)(F)OC(F)(C(F)(F)F)C(F)(F)OC(F)(C(F)(F)F)C(F)(F)OC(F)(C(F)(F)F)C(F)(OC(F)(F)C(F)(OC(F)(F)C(F)(OC(F)(F)C(F)(F)C(F)(F)F)C(F)(F)F)C(F)(F)F)C(F)(F)F	FC(F)(F)C(F)(F)C(F)(F)OC(F)(C(F)(F)F)C(F)(F)OC(F)(C(F)(F)F)C(F)(F)OC(F)(C(F)(F)F)C(F)(OC(F)(F)C(F)(OC(F)(F)C(F)(OC(F)(F)C(F)(F)C(F)(F)F)C(F)(F)F)C(F)(F)F)C(F)(F)F	C22F46O6	-2.7529	4923	0	13.752	248.497	31.3817	3.66176	0	0	-52.6748	0	0	1.57758	FALSE	0	0
458	Phosphonic acid, [3-[ethyl[(heptadecafluorooctyl)sulfonyl]amino]propyl]-, diethyl ester		CAS_RN: 71463-80-4	C(N([S](=O)(=O)C(F)(F)C(F)(F)C(F)(F)C(F)(F)C(F)(F)C(F)(F)C(F)(F)C(F)(F)F)CCC[P](=O)(OCC)OCC)C	CCOP(=O)(CCCN(CC)S(=O)(=O)C(F)(F)C(F)(F)C(F)(F)C(F)(F)C(F)(F)C(F)(F)C(F)(F)C(F)(F)F)OCC	C17H21F17NO5PS	-2.8451	2522.69	11.2406	13.0599	175.567	2509.32	3.25774	0	0	-36.7749	-1.37289	0	1.60617	FALSE	0	0
459	1,1,2,2,3,3,4,4,5,5,6,6-Dodecafluoro-7-(trifluoromethoxy)heptane		CAS_RN: 1737-33-3	FC(F)C(F)(F)C(F)(F)C(F)(F)C(F)(F)C(F)(F)COC(F)(F)F	FC(F)C(F)(F)C(F)(F)C(F)(F)C(F)(F)C(F)(F)COC(F)(F)F	C8H3F15O	-2.6881	1386.13	6.10059	12.3568	209.338	-3.51778	2.55007	0	0	-50.9734	-3.67121	0	1.48634	FALSE	0	0
460	multiple ether-substituted Perfluoroalkyl (linear) sulfonic acids, n=8		NA	FC(F)(F)C(F)(F)OC(F)(F)C(F)(F)OC(F)(F)C(F)(F)C(F)(F)C(F)(F)C(F)(F)C(F)(F)C(F)(F)C(F)(F)S(=O)(O)=O	O=S(=O)(O)C(F)(F)C(F)(F)C(F)(F)C(F)(F)C(F)(F)C(F)(F)C(F)(F)C(F)(F)OC(F)(F)C(F)(F)OC(F)(F)C(F)(F)F	C12HF25O5S	-0.8343	2865.9	16.4693	13.1978	234.957	138.222	3.35716	7.8867	0	-118.426	0	1	0.670746	TRUE	1	0
461	1-Propanesulfonic acid, 3-[ethyl[(heptadecafluorooctyl)sulfonyl]amino]-, sodium salt		CAS_RN: 75032-81-4	[Na+].CCN(CCCS([O-])(=O)=O)S(=O)(=O)C(F)(F)C(F)(F)C(F)(F)C(F)(F)C(F)(F)C(F)(F)C(F)(F)C(F)(F)F	CCN(CCCS(=O)(=O)O)S(=O)(=O)C(F)(F)C(F)(F)C(F)(F)C(F)(F)C(F)(F)C(F)(F)C(F)(F)C(F)(F)F	C13H12F17NO5S2	-0.8107	2436.62	11.2406	13.0232	189.046	1550.72	3.25435	8.5986	0	-44.9386	-1.59326	1	0.842919	TRUE	1	0
462	Cl-substituted perfluoroalkyl (linear) carboyxlic acids_i, n=13		NA	OC(C(F)(F)C(F)(F)C(F)(F)C(F)(F)C(F)(F)C(F)(F)C(F)(F)C(F)(F)C(F)(F)C(F)(F)C(F)(F)C(F)(F)C(F)(F)Cl)=O	O=C(O)C(F)(F)C(F)(F)C(F)(F)C(F)(F)C(F)(F)C(F)(F)C(F)(F)C(F)(F)C(F)(F)C(F)(F)C(F)(F)C(F)(F)C(F)(F)Cl	C14HClF26O2	0.8341	3523.53	21.2152	13.366	242.522	85.8883	3.29303	7.6671	-4.69415	-181.142	0	1	0.959611	TRUE	1	0
463	(1,1,1,2,3,3,3-Heptafluoropropan-2-yl)benzene		CAS_RN: 378-34-7	FC(F)(F)C(F)(c1ccccc1)C(F)(F)F	FC(F)(F)C(F)(c1ccccc1)C(F)(F)F	C9H5F7	0	849.67	2.3811	11.8	168.922	769.851	2.15067	0	0	74.3324	0	0	1.61961	FALSE	0	0
464	ether-substituted Perfluoroalkyl (linear) sulfonic acids_i, n=7		NA	S(=O)(O)(=O)C(F)(F)C(F)(F)C(F)(F)C(F)(F)C(F)(F)C(F)(F)C(F)(F)OC(F)(F)C(C(F)(F)F)(F)C(F)(F)F	O=S(=O)(O)C(F)(F)C(F)(F)C(F)(F)C(F)(F)C(F)(F)C(F)(F)C(F)(F)OC(F)(F)C(F)(C(F)(F)F)C(F)(F)F	C11HF23O4S	-0.158	3717.15	15.8446	13.1831	247.597	-31.9117	3.21821	7.8711	0	-81.996	0	1	0.715833	TRUE	1	0
465	[(1Z)-4,4,5,5,6,6,7,7,7-Nonafluorohept-1-en-1-yl]benzene		CAS_RN: 97041-10-6	FC(F)(F)C(F)(F)C(F)(F)C(F)(F)CC=C/c1ccccc1	FC(F)(F)C(F)(F)C(F)(F)C(F)(F)CC=Cc1ccccc1	C13H9F9	0	894.96	3.96541	11.9616	179.823	1186.26	2.61918	0	0	36.1817	-1.97166	0	1.47417	FALSE	0	0
466	8:2 Fuorotelomer sulfonamide betaine		CAS_RN: 34455-21-5	C[N+](C)(CCCNS(=O)(=O)CCC(F)(F)C(F)(F)C(F)(F)C(F)(F)C(F)(F)C(F)(F)C(F)(F)C(F)(F)F)CC([O-])=O	C[N+](C)(CCCNS(=O)(=O)CCC(F)(F)C(F)(F)C(F)(F)C(F)(F)C(F)(F)C(F)(F)C(F)(F)C(F)(F)F)CC(=O)O	C17H19F17N2O4S	-1.6611	2302.68	11.2406	12.9141	165.409	1361.48	3.26987	8.6968	-1.2855	-20.1253	-3.04304	1	1.11722	TRUE	1	0
467	n:2 fluorotelomer sulfonamido betaine-related, n=4		NA	FC(F)(F)C(F)(F)C(F)(F)C(F)(F)C(F)(F)C(F)(F)C(F)(F)C(F)(F)CCS(NCCC[N+](CC(O)=O)(C)C)(=O)=O	C[N+](C)(CCCNS(=O)(=O)CCC(F)(F)C(F)(F)C(F)(F)C(F)(F)C(F)(F)C(F)(F)C(F)(F)C(F)(F)F)CC(=O)O	C17H19F17N2O4S	-1.6611	2302.68	11.2406	12.9141	165.409	1361.48	3.26987	8.6968	-1.2855	-20.1253	-3.04304	1	1.11722	TRUE	1	0
468	2,2,3,3,4,4,4-heptafluoro-1-pyrrolidin-1-ylbutan-1-one		CAS_RN: 424-54-4	FC(F)(F)C(F)(F)C(F)(F)C(=O)N1CCCC1	O=C(N1CCCC1)C(F)(F)C(F)(F)C(F)(F)F	C8H8F7NO	-2.8978	707.42	2.3811	11.809	182.472	1736.11	2.43616	0	-2.4747	15.5915	-0.233769	0	1.62114	FALSE	0	0
469	ether-substituted Perfluoroalkyl (linear) sulfonic acids_ii, n=6		NA	S(=O)(O)(=O)C(F)(F)C(F)(F)C(F)(F)C(F)(F)C(F)(F)C(F)(F)OC(F)(F)C(F)(F)F	O=S(=O)(O)C(F)(F)C(F)(F)C(F)(F)C(F)(F)C(F)(F)C(F)(F)OC(F)(F)C(F)(F)F	C8HF17O4S	-0.2253	1924.47	9.9794	12.7887	233.555	122.207	2.81812	7.8428	0	-79.0135	0	1	0.534308	TRUE	1	0
470	Potassium 2,3,3,3-tetrafluoro-2-[1,1,2,3,3,3-hexafluoro-2-(heptafluoropropoxy)propoxy]propionate		CAS_RN: 67118-57-4	[K+].[O-]C(=O)C(F)(OC(F)(F)C(F)(OC(F)(F)C(F)(F)C(F)(F)F)C(F)(F)F)C(F)(F)F	O=C(O)C(F)(OC(F)(F)C(F)(OC(F)(F)C(F)(F)C(F)(F)F)C(F)(F)F)C(F)(F)F	C9HF17O4	-1.0461	1768.31	9.19158	12.6316	237.527	89.7697	3.1189	7.8537	-4.28557	-20.5179	0	1	0.777393	TRUE	1	0
471	Triphenyl(3,3,4,4,5,5,6,6,7,7,8,8,8-tridecafluorooctyl)phosphanium iodide		CAS_RN: 94190-73-5	[I-].FC(F)(F)C(F)(F)C(F)(F)C(F)(F)C(F)(F)C(F)(F)CC[P+](c1ccccc1)(c1ccccc1)c1ccccc1	FC(F)(F)C(F)(F)C(F)(F)C(F)(F)C(F)(F)C(F)(F)CC[P+](c1ccccc1)(c1ccccc1)c1ccccc1	C26H19F13P	2.5359	1649.24	7.47342	12.9439	212.058	1202.23	3.42386	0	0	90.8142	-2.21327	0	1.49461	FALSE	0	0
472	H-substituted perfluoroalkyl (linear) sulfonic acids_ii, n=8		NA	FC(F)(F)C([H])(F)C(F)(F)C(F)(F)C(F)(F)C(F)(F)C(F)(F)C(F)(F)C(F)(F)C(F)(F)S(=O)(O)=O	O=S(=O)(O)C(F)(F)C(F)(F)C(F)(F)C(F)(F)C(F)(F)C(F)(F)C(F)(F)C(F)(F)C(F)C(F)(F)F	C10H2F20O3S	0.643	2723.9	12.4044	13.0334	232.11	-51.4426	3.02945	7.8551	0	-112.496	0	1	0.525794	TRUE	1	0
473	Methanaminium perfluoro-2-(2-propoxypropoxy)propanoate		CAS_RN: 328065-29-8	C[NH3+].[O-]C(=O)C(F)(OC(F)(F)C(F)(OC(F)(F)C(F)(F)C(F)(F)F)C(F)(F)F)C(F)(F)F	O=C(O)C(F)(OC(F)(F)C(F)(OC(F)(F)C(F)(F)C(F)(F)F)C(F)(F)F)C(F)(F)F	C9HF17O4	-1.0461	1768.31	9.19158	12.6316	237.527	89.7697	3.1189	7.8537	-4.28557	-20.5179	0	1	0.777393	TRUE	1	0
474	Disulfides, bis(.gamma.-.omega.-perfluoro-C6-20-alkyl)		CAS_RN: 118400-71-8	CC(F)(F)C(F)(F)C(F)(F)CCSSCCC(F)(F)C(F)(F)C(C)(F)F	CC(F)(F)C(F)(F)C(F)(F)CCSSCCC(F)(F)C(F)(F)C(C)(F)F	C12H14F12S2	0.465	960.32	3.67785	12.0796	167.332	-1418.44	2.9193	0	0	-37.4365	-1.52967	0	1.50204	FALSE	0	0
475	Vinyl perfluorobutyrate		CAS_RN: 356-28-5	FC(F)(F)C(F)(F)C(F)(F)C(=O)OC=C	C=COC(=O)C(F)(F)C(F)(F)C(F)(F)F	C6H3F7O2	-4.1698	675.96	2.3811	11.5522	198.596	577.596	1.59029	0	-3.02794	-13.7761	0	0	1.71955	FALSE	0	0
476	(carboxymethyl)dimethyl-3-[methyl[(3,3,4,4,5,5,6,6,7,7,8,8,8-tridecafluorooctyl)sulphonyl]amino]propylammonium hydroxide		CAS_RN: 66008-71-7	[OH-].CN(CCC[N+](C)(C)CC(=O)O)S(=O)(=O)CCC(F)(F)C(F)(F)C(F)(F)C(F)(F)C(F)(F)C(F)(F)F	CN(CCC[N+](C)(C)CC(=O)O)S(=O)(=O)CCC(F)(F)C(F)(F)C(F)(F)C(F)(F)C(F)(F)C(F)(F)F	C16H21F13N2O4S	-3.3019	1768.18	7.47342	12.6436	149.59	182.753	3.27236	8.746	-1.21342	11.6929	-2.78485	1	1.33976	TRUE	1	0
477	Difluoro{[2,2,4,5-tetrafluoro-5-(trifluoromethoxy)-1,3-dioxolan-4-yl]oxy}acetic acid		CAS_RN: 1190931-41-9	O=C(O)C(F)(F)OC1(F)OC(F)(F)OC1(F)OC(F)(F)F	O=C(O)C(F)(F)OC1(F)OC(F)(F)OC1(F)OC(F)(F)F	C6HF9O6	-3.0114	975.63	3.92514	12.2272	238.27	-59.1685	2.53149	7.8379	-3.35398	39.7295	0	1	1.14786	TRUE	1	0
478	Sodium Perfluorononanesulfonate		CAS_RN: 98789-57-2	[Na+].[O-]S(=O)(=O)C(F)(F)C(F)(F)C(F)(F)C(F)(F)C(F)(F)C(F)(F)C(F)(F)C(F)(F)C(F)(F)F	O=S(=O)(O)C(F)(F)C(F)(F)C(F)(F)C(F)(F)C(F)(F)C(F)(F)C(F)(F)C(F)(F)C(F)(F)F	C9HF19O3S	0.7318	2545.65	13.1851	13.0083	235.547	93.9171	2.91356	7.8306	0	-108.019	0	1	0.514094	TRUE	1	0
479	Methyl perfluoroundecanoate		CAS_RN: 203302-98-1	COC(=O)C(F)(F)C(F)(F)C(F)(F)C(F)(F)C(F)(F)C(F)(F)C(F)(F)C(F)(F)C(F)(F)C(F)(F)F	COC(=O)C(F)(F)C(F)(F)C(F)(F)C(F)(F)C(F)(F)C(F)(F)C(F)(F)C(F)(F)C(F)(F)C(F)(F)F	C12H3F21O2	-1.696	2744.5	15.1596	13.0829	227.094	353.216	2.99864	0	-3.96321	-121.559	0	0	1.17559	TRUE	1	0
480	4(perfluorooctyl)-2-butanol		CAS_RN: 149868-74-6	CC(O)CCC(F)(F)C(F)(F)C(F)(F)C(F)(F)C(F)(F)C(F)(F)C(F)(F)C(F)(F)F	CC(O)CCC(F)(F)C(F)(F)C(F)(F)C(F)(F)C(F)(F)C(F)(F)C(F)(F)C(F)(F)F	C12H9F17O	0.0587	2070.25	11.2406	12.7922	195.507	2064.1	2.87965	8.6229	0	-47.1949	-2.62102	0	1.1087	TRUE	1	0
481	Tetrahydro(perfluorobutyl)furan		CAS_RN: 26446-59-3	FC(F)(F)C(F)(F)C(F)(F)C(F)(F)C1CCCO1	FC(F)(F)C(F)(F)C(F)(F)C(F)(F)C1CCCO1	C8H7F9O	-1.6562	915.75	3.96541	12.0693	174.599	1595.97	2.34375	0	0	10.8517	-0.711779	0	1.53112	FALSE	0	0
482	4-[(Nonadecafluorodecenyl)oxy]benzenesulfonic acid, sodium salt		CAS_RN: 64910-98-1	OS(=O)(=O)C1=CC=C(OC(F)(F)C(F)(F)C(F)(F)C(F)(F)C(F)(F)C(F)(F)C(F)(F)C(F)(F)C(F)=C(F)F)C=C1	O=S(=O)(O)c1ccc(OC(F)(F)C(F)(F)C(F)(F)C(F)(F)C(F)(F)C(F)(F)C(F)(F)C(F)(F)C(F)=C(F)F)cc1	C16H5F19O4S	0.4289	2527.4	11.2406	13.0375	225.375	359.519	3.33	8.7806	-4.97576	-41.829	0	1	0.765418	TRUE	1	0
483	Nonafluoropentanoyl bromide		CAS_RN: 159623-35-5	FC(F)(F)C(F)(F)C(F)(F)C(F)(F)C(Br)=O	O=C(Br)C(F)(F)C(F)(F)C(F)(F)C(F)(F)F	C5BrF9O	-1.1135	857.87	3.96541	11.8888	255.302	-317.818	2.30967	0	-2.55655	-39.7363	0	0	1.34669	TRUE	1	0
484	N,N-Dibutyl-N-methylbutan-1-aminium heptadecafluorooctane-1-sulfonate		CAS_RN: 124472-68-0	CCCC[N+](C)(CCCC)CCCC.[O-]S(=O)(=O)C(F)(F)C(F)(F)C(F)(F)C(F)(F)C(F)(F)C(F)(F)C(F)(F)C(F)(F)F	CCCC[N+](C)(CCCC)CCCC	C13H30N	-6.0825	194.25	0	10.3778	110.015	-222.207	2.57553	0	0	0.8912	1.33937	0	2.53801	FALSE	0	0
485	Sodium 3,3,4,4,5,5,6,6,7,7,8,8,8-tridecafluorooctane-1-sulfonate		CAS_RN: 27619-94-9	[Na+].[O-]S(=O)(=O)CCC(F)(F)C(F)(F)C(F)(F)C(F)(F)C(F)(F)C(F)(F)F	O=S(=O)(O)CCC(F)(F)C(F)(F)C(F)(F)C(F)(F)C(F)(F)C(F)(F)F	C8H5F13O3S	0.6084	1479.97	7.47342	12.468	206.555	188.461	2.60572	8.183	0	-29.9879	-2.91819	1	0.81393	TRUE	1	0
486	1-Chloro-perfluorooctanesulfonic acid		NA	FC(C(C(C(C(S(=O)(=O)O)(Cl)F)(F)F)(F)F)(F)F)(C(C(C(F)(F)F)(F)F)(F)F)F	O=S(=O)(O)C(F)(Cl)C(F)(F)C(F)(F)C(F)(F)C(F)(F)C(F)(F)C(F)(F)C(F)(F)F	C8HClF16O3S	0.8482	2126.65	11.2406	12.8772	241.238	17.1142	2.95389	8.2323	0	-80.4772	0	1	0.544922	TRUE	1	0
487	Perfluoro(4-isopropyltoluene)		CAS_RN: 20017-49-6	FC1=C(F)C(=C(F)C(F)=C1C(F)(F)F)C(F)(C(F)(F)F)C(F)(F)F	Fc1c(F)c(C(F)(C(F)(F)F)C(F)(F)F)c(F)c(F)c1C(F)(F)F	C10F14	0	1628.5	2.24958	12.4962	236.49	-129.18	2.68141	0	0	42.7235	0	0	1.31535	TRUE	1	0
488	Octatriacontafluorooctadecane		CAS_RN: 24768-65-8	FC(F)(F)C(F)(F)C(F)(F)C(F)(F)C(F)(F)C(F)(F)C(F)(F)C(F)(F)C(F)(F)C(F)(F)C(F)(F)C(F)(F)C(F)(F)C(F)(F)C(F)(F)C(F)(F)C(F)(F)C(F)(F)F	FC(F)(F)C(F)(F)C(F)(F)C(F)(F)C(F)(F)C(F)(F)C(F)(F)C(F)(F)C(F)(F)C(F)(F)C(F)(F)C(F)(F)C(F)(F)C(F)(F)C(F)(F)C(F)(F)C(F)(F)C(F)(F)F	C18F38	-0.4429	4993.88	31.5895	13.6929	242.359	-2.42874	3.48429	0	0	-213.714	0	0	1.62619	FALSE	0	0
489	1,1,1,2,2,3,3,4,4,5,5,6,6-Tridecafluoro-8-iodooctadecane		CAS_RN: 125081-35-8	CCCCCCCCCCC(I)CC(F)(F)C(F)(F)C(F)(F)C(F)(F)C(F)(F)C(F)(F)F	CCCCCCCCCCC(I)CC(F)(F)C(F)(F)C(F)(F)C(F)(F)C(F)(F)C(F)(F)F	C18H24F13I	-1.1364	1550.43	7.47342	12.4881	159.564	633.698	3.28697	0	0	22.1296	-1.98912	0	1.45898	FALSE	0	0
490	2-(N-Ethylperfluorooctanesulfonamido)acetic acid (EtFOSAA)		CAS_RN: 1336-61-4	FC(F)(C(F)(F)C(F)(F)C(F)(F)C(F)(F)C(F)(F)C(F)(F)C(F)(F)F)S(=O)(=O)N(CC(O)=O)CC	CCN(CC(=O)O)S(=O)(=O)C(F)(F)C(F)(F)C(F)(F)C(F)(F)C(F)(F)C(F)(F)C(F)(F)C(F)(F)F	C12H8F17NO4S	-0.9988	2378.36	11.2406	13.0038	200.522	781.133	3.09473	8.3458	-2.42853	-68.2304	-2.19953	1	0.58603	TRUE	1	0
491	Potassium 2,2,3,3-tetrafluoro-3-(heptafluoropropoxy)propionate		CAS_RN: 84100-11-8	[K+].[O-]C(=O)C(F)(F)C(F)(F)OC(F)(F)C(F)(F)C(F)(F)F	O=C(O)C(F)(F)C(F)(F)OC(F)(F)C(F)(F)C(F)(F)F	C6HF11O3	-0.1826	1079.96	4.5088	12.0229	235.051	98.041	2.4698	7.5718	-3.78368	-40.3561	0	1	0.811762	TRUE	1	0
492	1,1'-Oxybis[4-(tridecafluorohexyl)benzene]		CAS_RN: 151707-03-8	FC(F)(F)C(F)(F)C(F)(F)C(F)(F)C(F)(F)C(F)(F)C1=CC=C(OC2=CC=C(C=C2)C(F)(F)C(F)(F)C(F)(F)C(F)(F)C(F)(F)C(F)(F)F)C=C1	FC(F)(F)C(F)(F)C(F)(F)C(F)(F)C(F)(F)C(F)(F)c1ccc(Oc2ccc(C(F)(F)C(F)(F)C(F)(F)C(F)(F)C(F)(F)C(F)(F)F)cc2)cc1	C24H8F26O	-0.0472	3063.58	11.058	13.311	226.719	1842.71	3.53758	0	0	15.8417	0	0	1.37109	FALSE	0	0
493	multiple H-substituted perfluoroalkyl (linear) carboxylic acids, n=2		NA	[H]C(F)(F)CC(F)(F)CC(F)(F)C(O)=O	O=C(O)C(F)(F)CC(F)(F)CC(F)F	C6H6F6O2	-0.3929	677.25	0.5	10.942	151.258	-968.808	1.82462	7.7679	-2.75792	-16.3972	-2.41699	1	1.57447	FALSE	0	0
494	1H,1H-Perfluoropropyl methacrylate		CAS_RN: 45115-53-5	CC(=C)C(=O)OCC(F)(F)C(F)(F)F	C=C(C)C(=O)OCC(F)(F)C(F)(F)F	C7H7F5O2	-4.7989	254.92	1	10.8963	218.325	107.218	2.18108	0	-1.2834	24.4575	-2.0256	0	1.88041	FALSE	0	0
495	multiple H-substituted, multiple ether-substituted perfluoroalkyl alcohols, n=3, m=18		NA	FC(F)(F)C(F)(F)C(F)(F)C(F)(F)C(F)(F)C(F)(F)CCOCCOCCOCCOCCOCCOCCOCCOCCOCCOCCOCCOCCOCCOCCOCCOCCOCCO[H]	OCCOCCOCCOCCOCCOCCOCCOCCOCCOCCOCCOCCOCCOCCOCCOCCOCCOCCC(F)(F)C(F)(F)C(F)(F)C(F)(F)C(F)(F)C(F)(F)F	C42H73F13O18	-6.4009	1960.88	7.47342	12.6023	121.302	2814.88	3.45974	8.5897	0	-23.3066	-2.43449	0	2.18747	FALSE	0	0
496	H-substituted Perfluoroalkyl (linear) carboxylic acids_i, n=6		NA	C(O)(=O)C(F)C(F)(F)C(F)(F)C(F)(F)C(F)(F)C(F)(F)C(F)(F)F	O=C(O)C(F)C(F)(F)C(F)(F)C(F)(F)C(F)(F)C(F)(F)C(F)(F)F	C8H2F14O2	1.0063	1726.63	7.47342	12.5168	218.92	77.9045	2.55511	7.6897	-3.59595	-74.9011	0	1	0.54398	TRUE	1	0
497	12,12,13,13,14,14,15,15,16,16,17,17,17-Tridecafluoroheptadecanoyl chloride		CAS_RN: 118624-66-1	FC(F)(F)C(F)(F)C(F)(F)C(F)(F)C(F)(F)C(F)(F)CCCCCCCCCCC(Cl)=O	O=C(Cl)CCCCCCCCCCC(F)(F)C(F)(F)C(F)(F)C(F)(F)C(F)(F)C(F)(F)F	C17H20ClF13O	-1.1524	1558.67	7.47342	12.4568	154.931	3624.98	3.21349	0	0.171168	11.3191	-2.1186	0	1.96448	FALSE	0	0
498	3-(Trifluorosilyl)propyl nonafluoropentanoate		CAS_RN: 92916-37-5	FC(F)(F)C(F)(F)C(F)(F)C(F)(F)C(=O)OCCC[Si](F)(F)F	O=C(OCCC[Si](F)(F)F)C(F)(F)C(F)(F)C(F)(F)C(F)(F)F	C8H6F12O2Si	-5.1727	1057.1	3.96541	12.0521	198.234	852.831	2.61138	0	-3.47952	18.9501	-1.48066	0	1.69352	FALSE	0	0
499	perfluoroalkylamido ammonium, n=8		CAS_RN: 103831-29-4	C(NCCCN(C)C)(=O)C(F)(F)C(F)(F)C(F)(F)C(F)(F)C(F)(F)C(F)(F)C(F)(F)C(F)(F)F	CN(C)CCCNC(=O)C(F)(F)C(F)(F)C(F)(F)C(F)(F)C(F)(F)C(F)(F)C(F)(F)C(F)(F)F	C14H13F17N2O	-2.5597	2216.21	11.2406	12.8531	185.642	2687.66	3.07945	0	-3.49775	-60.0029	-1.01718	0	1.55156	FALSE	0	0
500	N,N-Diethyl-1,1,1,2,2,3,3,5,6,6,8,9,9,11-tetradecafluoro-N-methyl-12-oxo-5,8,11-tris(trifluoromethyl)-4,7,10-trioxa-13-azahexadecan-16-aminium iodide		CAS_RN: 84166-37-0	[I-].CC[N+](C)(CC)CCCNC(=O)C(F)(OC(F)(F)C(F)(OC(F)(F)C(F)(OC(F)(F)C(F)(F)C(F)(F)F)C(F)(F)F)C(F)(F)F)C(F)(F)F	CC[N+](C)(CC)CCCNC(=O)C(F)(OC(F)(F)C(F)(OC(F)(F)C(F)(OC(F)(F)C(F)(F)C(F)(F)F)C(F)(F)F)C(F)(F)F)C(F)(F)F	C20H19F23N2O4	-4.2135	2598.46	14.3995	13.0767	163.358	4038.51	3.29744	0	-3.61977	66.1531	-1.19243	0	2.22238	FALSE	0	0
501	3,4,5,6,7-Pentafluoro-3-(1,1,1,2,3,3,3-heptafluoropropan-2-yl)-2-benzofuran-1(3H)-one		CAS_RN: 1419865-31-8	Fc1c2C(=O)OC(F)(c2c(F)c(F)c1F)C(F)(C(F)(F)F)C(F)(F)F	O=C1OC(F)(C(F)(C(F)(F)F)C(F)(F)F)c2c(F)c(F)c(F)c(F)c21	C11F12O2	-0.2907	1809.94	4.24264	12.8221	275.135	-76.1779	2.70921	0	-2.80248	30.957	0	0	1.363	FALSE	0	0
502	Ethyl heptafluorobutyrylacetate		CAS_RN: 336-62-9	CCOC(=O)CC(=O)C(F)(F)C(F)(F)C(F)(F)F	CCOC(=O)CC(=O)C(F)(F)C(F)(F)C(F)(F)F	C8H7F7O3	-3.7058	765	2.3811	11.656	174.151	899.75	2.4116	0	-2.85808	6.8521	-1.86854	0	1.66312	FALSE	0	0
503	Ammonium bis(3,3,4,4,5,5,6,6,7,7,8,8,9,9,10,10,11,11,12,12,13,13,14,14,14-pentacosafluorotetradecyl) phosphate		CAS_RN: 93776-22-8	[NH4+].[O-]P(=O)(OCCC(F)(F)C(F)(F)C(F)(F)C(F)(F)C(F)(F)C(F)(F)C(F)(F)C(F)(F)C(F)(F)C(F)(F)C(F)(F)C(F)(F)F)OCCC(F)(F)C(F)(F)C(F)(F)C(F)(F)C(F)(F)C(F)(F)C(F)(F)C(F)(F)C(F)(F)C(F)(F)C(F)(F)C(F)(F)F	O=P(O)(OCCC(F)(F)C(F)(F)C(F)(F)C(F)(F)C(F)(F)C(F)(F)C(F)(F)C(F)(F)C(F)(F)C(F)(F)C(F)(F)C(F)(F)F)OCCC(F)(F)C(F)(F)C(F)(F)C(F)(F)C(F)(F)C(F)(F)C(F)(F)C(F)(F)C(F)(F)C(F)(F)C(F)(F)C(F)(F)F	C28H9F50O4P	-0.7494	6626.03	0	13.9755	220.517	916.483	3.73466	9.1605	0	-230.86	-4.14576	1	1.75123	FALSE	0	0
504	1,1,1,2,2,3,3,4,4,5,5,6,6-Tridecafluoro-8-iodoheptadecane		CAS_RN: 207122-01-8	CCCCCCCCCC(I)CC(F)(F)C(F)(F)C(F)(F)C(F)(F)C(F)(F)C(F)(F)F	CCCCCCCCCC(I)CC(F)(F)C(F)(F)C(F)(F)C(F)(F)C(F)(F)C(F)(F)F	C17H22F13I	-1.1661	1538.18	7.47342	12.4842	162.971	253.403	3.26688	0	0	20.66	-1.98978	0	1.43243	FALSE	0	0
505	2H-Perfluoro-2-decenoic acid	FOUEA	CAS_RN: 70887-84-2	FC(C(F)(C(F)(C(C(F)CC(O)=O)(F)F)F)F)(C(F)(F)C(F)(F)C(F)(F)F)F	O=C(O)CC(F)C(F)(F)C(F)(F)C(F)(F)C(F)(F)C(F)(F)C(F)(F)C(F)(F)F	C10H4F16O2	0.6126	1986.65	9.33326	12.694	214.805	494.258	2.7813	7.903	-2.74353	-70.7802	-2.77843	1	0.576307	TRUE	1	1
506	Perfluorodecahydro-2-sec-butylnaphthalene		CAS_RN: 119141-86-5	FC(F)(F)C(F)(F)C(F)(C(F)(F)F)C1(F)C(F)(F)C(F)(F)C2(F)C(F)(F)C(F)(F)C(F)(F)C(F)(F)C2(F)C1(F)F	FC(F)(F)C(F)(F)C(F)(C(F)(F)F)C1(F)C(F)(F)C(F)(F)C2(F)C(F)(F)C(F)(F)C(F)(F)C(F)(F)C2(F)C1(F)F	C14F26	0.5452	4291.88	32.483	13.9276	233.297	-97.5255	3.18037	0	0	-45.9515	0	0	1.47869	FALSE	0	0
507	2-{[(3,3,4,4,5,5,6,6,6-Nonafluorohexyl)oxy]methyl}oxirane		CAS_RN: 384828-82-4	FC(F)(F)C(F)(F)C(F)(F)C(F)(F)CCOCC1CO1	FC(F)(F)C(F)(F)C(F)(F)C(F)(F)CCOCC1CO1	C9H9F9O2	-2.9624	907.67	3.96541	11.9511	162.112	1146.25	2.4674	0	0	-4.7981	-1.97382	0	1.63512	FALSE	0	0
508	1-(4-Bromophenyl)-2,2,3,3,4,4,5,5,5-nonafluoropentan-1-one		CAS_RN: 1228786-80-8	FC(F)(F)C(F)(F)C(F)(F)C(F)(F)C(=O)c1ccc(Br)cc1	O=C(c1ccc(Br)cc1)C(F)(F)C(F)(F)C(F)(F)C(F)(F)F	C11H4BrF9O	0	1006.77	3.96541	12.1836	230.66	-1257.79	2.61918	0	-2.80604	35.8895	0	0	1.41099	FALSE	0	0
509	N-Methyl-N-trimethylsilylheptafluorobutyramide		CAS_RN: 53296-64-3	CN(C(=O)C(F)(F)C(F)(F)C(F)(F)F)[Si](C)(C)C	CN(C(=O)C(F)(F)C(F)(F)C(F)(F)F)[Si](C)(C)C	C8H12F7NOSi	6.4387	771.16	2.3811	11.8635	137.66	140.086	2.34948	0	-2.48019	30.0578	0	0	1.97009	FALSE	0	0
510	1,1,1,2,3,3,3-Heptafluoro-2-(1,1,2,3,3,3-hexafluoro-2-iodopropoxy)propane		CAS_RN: 16005-45-1	FC(F)(F)C(F)(I)C(F)(F)OC(F)(C(F)(F)F)C(F)(F)F	FC(F)(F)C(F)(I)C(F)(F)OC(F)(C(F)(F)F)C(F)(F)F	C6F13IO	-2.1245	1297.97	6.40993	12.2053	273.515	-1199.16	2.43244	0	0	-2.2953	0	0	1.57129	FALSE	0	0
511	N-(9,10-Dioxo-9,10-dihydroanthracen-1-yl)-2,2,3,3,4,4,4-heptafluorobutanamide		CAS_RN: 162441-56-7	FC(F)(F)C(F)(F)C(F)(F)C(=O)Nc1cccc2C(=O)c3ccccc3C(=O)c12	O=C1c2ccccc2C(=O)c2c(NC(=O)C(F)(F)C(F)(F)C(F)(F)F)cccc21	C18H8F7NO3	1.9833	947.13	2.3811	12.5183	230.386	1104.19	3.10977	0	-2.97932	70.2081	0	0	1.41153	FALSE	0	0
512	N-(Perfluoro-1-oxobutyl)aspartic acid 1-propyl ester		CAS_RN: 88436-09-3	CCCOC(=O)[C@H](CC(O)=O)NC(=O)C(F)(F)C(F)(F)C(F)(F)F	CCCOC(=O)[C@H](CC(=O)O)NC(=O)C(F)(F)C(F)(F)C(F)(F)F	C11H12F7NO5	-1.4693	869.11	2.3811	11.8569	194.699	1463.28	2.82623	8.4883	-3.16248	8.5292	-1.35917	1	1.08462	TRUE	1	0
513	2(5H)-Furanone, 5-(heptafluoropropyl)-		CAS_RN: 143469-51-6	FC(F)(F)C(F)(F)C(F)(F)C1OC(=O)C=C1	O=C1C=CC(C(F)(F)C(F)(F)C(F)(F)F)O1	C7H3F7O2	-1.7505	633.63	2.3811	11.7971	199.749	442.991	2.09005	0	-1.40032	15.8486	0	0	1.44171	FALSE	0	0
514	n:2 fluorotelomer thio hydroxy ammonium, n=3		CAS_RN: 88992-46-5	C[N+](C)(C)CC(O)CSCCC(F)(F)C(F)(F)C(F)(F)C(F)(F)C(F)(F)C(F)(F)F	C[N+](C)(C)CC(O)CSCCC(F)(F)C(F)(F)C(F)(F)C(F)(F)C(F)(F)C(F)(F)F	C14H19F13NOS	-2.2509	1569.76	7.47342	12.4999	165.554	1126.52	3.00995	9.6687	0	15.1203	-2.12722	0	1.28564	TRUE	1	0
515	1,1,1,2,2,3,3,4,4,5,5,6,6,7,7,8,8,9,9,10,10,11,11,12,12-Pentacosafluorotetracosane		CAS_RN: 89109-71-7	CCCCCCCCCCCCC(F)(F)C(F)(F)C(F)(F)C(F)(F)C(F)(F)C(F)(F)C(F)(F)C(F)(F)C(F)(F)C(F)(F)C(F)(F)C(F)(F)F	CCCCCCCCCCCCC(F)(F)C(F)(F)C(F)(F)C(F)(F)C(F)(F)C(F)(F)C(F)(F)C(F)(F)C(F)(F)C(F)(F)C(F)(F)C(F)(F)F	C24H25F25	-0.776	3338.75	19.1782	13.2761	173.423	7120.25	3.39788	0	0	-35.0953	-2.63186	0	2.98382	FALSE	0	0
516	multiple H-substituted, multiple ether-substituted perfluoroalkyl alcohols, n=3, m=15		NA	FC(F)(F)C(F)(F)C(F)(F)C(F)(F)C(F)(F)C(F)(F)CCOCCOCCOCCOCCOCCOCCOCCOCCOCCOCCOCCOCCOCCOCCO[H]	OCCOCCOCCOCCOCCOCCOCCOCCOCCOCCOCCOCCOCCOCCOCCC(F)(F)C(F)(F)C(F)(F)C(F)(F)C(F)(F)C(F)(F)F	C36H61F13O15	-6.1477	1874.63	7.47342	12.5708	123.596	2871.57	3.44125	8.5764	0	-21.2134	-2.43254	0	2.15739	FALSE	0	0
517	(1Z)-1,2,3,3,4,4,5,5,6,6,7,7,8,8,9,9,10,10,10-Nonadecafluoro-1-iododec-1-ene		CAS_RN: 56184-40-8	FC(I)=C(F)C(F)(F)C(F)(F)C(F)(F)C(F)(F)C(F)(F)C(F)(F)C(F)(F)C(F)(F)F	FC(I)=C(F)C(F)(F)C(F)(F)C(F)(F)C(F)(F)C(F)(F)C(F)(F)C(F)(F)C(F)(F)F	C10F19I	-0.6108	2231.43	11.2406	12.8545	255.319	-161.011	2.99436	0	-4.18455	-121.414	0	0	1.20738	TRUE	1	0
518	1,1,1,2,2,3,3,4,4,5,5,6,6,7,7,8,8,9,9-Nonadecafluorohenicosane		CAS_RN: 677324-20-8	CCCCCCCCCCCCC(F)(F)C(F)(F)C(F)(F)C(F)(F)C(F)(F)C(F)(F)C(F)(F)C(F)(F)C(F)(F)F	CCCCCCCCCCCCC(F)(F)C(F)(F)C(F)(F)C(F)(F)C(F)(F)C(F)(F)C(F)(F)C(F)(F)C(F)(F)F	C21H25F19	-0.9744	2446.06	13.1851	12.9447	161.086	5993.97	3.3034	0	0	-8.9682	-2.42417	0	2.61398	FALSE	0	0
519	1,1,1,2,2,3,3,4,4,7,7,8,8,8-Tetradecafluorooctane		CAS_RN: 343627-66-7	FC(F)(F)C(F)(F)CCC(F)(F)C(F)(F)C(F)(F)C(F)(F)F	FC(F)(F)C(F)(F)CCC(F)(F)C(F)(F)C(F)(F)C(F)(F)F	C8H4F14	-1.55	972.38	5.47991	12.1235	186.046	707.619	2.47321	0	0	-15.129	-3.25181	0	1.48409	FALSE	0	0
520	2,4-Dichlorophenyl nonafluorobutane-1-sulfonate		CAS_RN: 32848-21-8	FC(F)(F)C(F)(F)C(F)(F)C(F)(F)S(=O)(=O)Oc1ccc(Cl)cc1Cl	O=S(=O)(Oc1ccc(Cl)cc1Cl)C(F)(F)C(F)(F)C(F)(F)C(F)(F)F	C10H3Cl2F9O3S	-1.5479	1113.12	3.96541	12.3745	261.206	-595.278	3.04425	0	0	18.618	0	0	1.44435	FALSE	0	0
521	3,3-Dichloro-1,1,1,2,2-pentafluoropropane		CAS_RN: 422-56-0	FC(F)(F)C(F)(F)C(Cl)Cl	FC(F)(F)C(F)(F)C(Cl)Cl	C3HCl2F5	-1.8752	88.59	1	10.7735	0	-97.2102	1.58175	0	0	-2.9419	0	0	3.10519	FALSE	0	0
522	1,1,1,2,2,3,3,4,4,5,5,6,6,7,7,8,8-Heptadecafluoro-12-iodododecane		CAS_RN: 38565-62-7	FC(F)(F)C(F)(F)C(F)(F)C(F)(F)C(F)(F)C(F)(F)C(F)(F)C(F)(F)CCCCI	FC(F)(F)C(F)(F)C(F)(F)C(F)(F)C(F)(F)C(F)(F)C(F)(F)C(F)(F)CCCCI	C12H8F17I	-1.0053	2048.84	11.2406	12.7837	205.795	-504.488	3.08571	0	0	-39.7524	-2.30803	0	1.21052	TRUE	1	0
523	Ethyl 4,4,5,5,6,6,6-heptafluoro-3-(nitromethyl)hexanoate		CAS_RN: 376-88-5	CCOC(=O)CC(C[N+]([O-])=O)C(F)(F)C(F)(F)C(F)(F)F	CCOC(=O)CC(C[N+](=O)[O-])C(F)(F)C(F)(F)C(F)(F)F	C9H10F7NO4	-3.7819	767.79	2.3811	11.8117	169.294	891.646	2.62233	0	-1.53982	17.9794	-1.94694	0	1.6662	FALSE	0	0
524	1,1,1,2,2,3,3,4,4,5,5,6,6,7,7,8,8,9,9,10,10,11,11,12,12-Pentacosafluoroheptacosane		CAS_RN: 116177-48-1	CCCCCCCCCCCCCCCC(F)(F)C(F)(F)C(F)(F)C(F)(F)C(F)(F)C(F)(F)C(F)(F)C(F)(F)C(F)(F)C(F)(F)C(F)(F)C(F)(F)F	CCCCCCCCCCCCCCCC(F)(F)C(F)(F)C(F)(F)C(F)(F)C(F)(F)C(F)(F)C(F)(F)C(F)(F)C(F)(F)C(F)(F)C(F)(F)C(F)(F)F	C27H31F25	-0.741	3375.5	19.1782	13.2813	165.729	7971.46	3.44394	0	0	-23.5372	-2.63061	0	3.3022	FALSE	0	0
525	2-Hydroxy-3-[ethyl[(nonafluorobutyl)sulfonyl]amino]propanesulfonic acid monoammonium salt		CAS_RN: 484023-83-8	[NH4+].CCN(CC(O)CS([O-])(=O)=O)S(=O)(=O)C(F)(F)C(F)(F)C(F)(F)C(F)(F)F	CCN(CC(O)CS(=O)(=O)O)S(=O)(=O)C(F)(F)C(F)(F)C(F)(F)C(F)(F)F	C9H12F9NO6S2	0.0822	1358.44	3.96541	12.4101	171.411	812.863	3.02303	9.2622	0	0.5083	-1.63136	1	0.968251	TRUE	1	0
526	Perflisobutane		CAS_RN: 354-92-7	FC(F)(F)C(F)(C(F)(F)F)C(F)(F)F	FC(F)(F)C(F)(C(F)(F)F)C(F)(F)F	C4F10	-2.0764	1728	4.24264	11.7986	0	-143.482	1.58175	0	0	-6.9753	0	0	2.95067	FALSE	0	0
527	(9E)-1,1,1,2,2,3,3,4,4,5,5,6,6,7,7,8,8,11,11,12,12,13,13,14,14,15,15,16,16,17,17,18,18,18-Tetratriacontafluorooctadec-9-ene		CAS_RN: 51249-70-8	FC(F)(F)C(F)(F)C(F)(F)C(F)(F)C(F)(F)C(F)(F)C(F)(F)C(F)(F)C=CC(F)(F)C(F)(F)C(F)(F)C(F)(F)C(F)(F)C(F)(F)C(F)(F)C(F)(F)F	FC(F)(F)C(F)(F)C(F)(F)C(F)(F)C(F)(F)C(F)(F)C(F)(F)C(F)(F)C=CC(F)(F)C(F)(F)C(F)(F)C(F)(F)C(F)(F)C(F)(F)C(F)(F)C(F)(F)F	C18H2F34	-0.4976	4010.63	23.7158	13.4825	233.72	368.471	3.46423	0	0	-166	0	0	1.33141	TRUE	1	0
528	5-(Heptafluoropropyl)-N,1-dimethyl-1H-1,2,4-triazol-3-amine		CAS_RN: 714975-28-7	CNc1nc(n(C)n1)C(F)(F)C(F)(F)C(F)(F)F	CNc1nc(C(F)(F)C(F)(F)C(F)(F)F)n(C)n1	C7H7F7N4	-4.4278	680.13	2.3811	11.9704	184.792	884.572	2.49391	0	0	-9.7049	0	0	1.67419	FALSE	0	0
529	1,1,2,3,4,4,4-Heptafluoro-3-(trifluoromethyl)but-1-ene		CAS_RN: 21581-82-8	FC(F)=C(F)C(F)(C(F)(F)F)C(F)(F)F	FC(F)=C(F)C(F)(C(F)(F)F)C(F)(F)F	C5F10	-1.6796	1208	2.3811	11.7024	177.044	-92.2227	1.58175	0	-4.20602	-12.6588	0	0	1.59946	FALSE	0	0
530	(2S)-2-Pyrrolidinyl-bis(4-(perfluorooctyl)phenyl)methanol		CAS_RN: 862589-19-3	[H][C@]1(CCCN1)C(O)(C1=CC=C(C=C1)C(F)(F)C(F)(F)C(F)(F)C(F)(F)C(F)(F)C(F)(F)C(F)(F)C(F)(F)F)C1=CC=C(C=C1)C(F)(F)C(F)(F)C(F)(F)C(F)(F)C(F)(F)C(F)(F)C(F)(F)C(F)(F)F	OC(c1ccc(C(F)(F)C(F)(F)C(F)(F)C(F)(F)C(F)(F)C(F)(F)C(F)(F)C(F)(F)F)cc1)(c1ccc(C(F)(F)C(F)(F)C(F)(F)C(F)(F)C(F)(F)C(F)(F)C(F)(F)C(F)(F)F)cc1)[C@@H]1CCCN1	C33H17F34NO	1.5858	4451.33	19.4011	13.7422	211.494	4703.48	3.66236	11.6466	0	37.7616	-0.482604	0	2.11505	FALSE	0	0
531	Potassium pentadecafluorooctanoate--water (1/1/2)		CAS_RN: 98065-31-7	O.O.[K+].[O-]C(=O)C(F)(F)C(F)(F)C(F)(F)C(F)(F)C(F)(F)C(F)(F)C(F)(F)F	O=C(O)C(F)(F)C(F)(F)C(F)(F)C(F)(F)C(F)(F)C(F)(F)C(F)(F)F	C8HF15O2	1.2039	1852.94	9.33326	12.6412	227.027	103.07	2.59555	7.574	-4.27882	-85.2824	0	1	0.615412	TRUE	1	0
532	Hexane, 1,1,1,2,2,3,3,4,5,5,6,6,6-tridecafluoro-4-(trifluoromethyl)-		CAS_RN: 558-69-0	FC(F)(F)C(F)(F)C(F)(F)C(F)(C(F)(F)F)C(F)(F)C(F)(F)F	FC(F)(F)C(F)(F)C(F)(F)C(F)(C(F)(F)F)C(F)(F)C(F)(F)F	C7F16	-1.1638	1972.69	10.0767	12.645	216.933	-46.6087	2.51604	0	0	-40.489	0	0	1.15013	TRUE	1	0
533	3,3,4,4,5,5,6,6,7,7,8,8,9,9,10,10,10-Heptadecafluorodecyl acetate		CAS_RN: 37858-04-1	CC(=O)OCCC(F)(F)C(F)(F)C(F)(F)C(F)(F)C(F)(F)C(F)(F)C(F)(F)C(F)(F)F	CC(=O)OCCC(F)(F)C(F)(F)C(F)(F)C(F)(F)C(F)(F)C(F)(F)C(F)(F)C(F)(F)F	C12H7F17O2	-2.0855	2102.79	11.2406	12.7936	199.15	919.702	2.93709	0	-1.51689	-66.6918	-2.79968	0	1.2444	TRUE	1	0
534	PFOPA	PFOPA	CAS_RN: 40143-78-0	C(C(C(C(C(F)(F)P(=O)(O)O)(F)F)(F)F)(F)F)(C(C(C(F)(F)F)(F)F)(F)F)(F)F	O=P(O)(O)C(F)(F)C(F)(F)C(F)(F)C(F)(F)C(F)(F)C(F)(F)C(F)(F)C(F)(F)F	C8H2F17O3P	2.6051	2248.88	11.2406	12.8772	226.37	192.138	2.77439	7.9306	0	-91.7602	0	2	0.782989	TRUE	1	1
535	1-((3-(Dimethylamino)propyl)amino)-(3-(perfluoro-11-methyldodecyl))propan-2-ol		CAS_RN: 94159-82-7	C(NCCCN(C)C)C(O)CC(F)(F)C(F)(F)C(F)(F)C(F)(F)C(F)(F)C(F)(F)C(F)(F)C(F)(F)C(F)(F)C(F)(F)C(F)(C(F)(F)F)C(F)(F)F	CN(C)CCCNCC(O)CC(F)(F)C(F)(F)C(F)(F)C(F)(F)C(F)(F)C(F)(F)C(F)(F)C(F)(F)C(F)(F)C(F)(F)C(F)(C(F)(F)F)C(F)(F)F	C21H19F27N2O	-1.0278	4300.1	21.7082	13.4157	187.609	3656.91	3.39068	9.3411	0	-63.9591	-3.22893	0	1.79301	FALSE	0	0
536	2-[[[dimethyl(3,3,4,4,5,5,6,6,7,7,8,8,8-tridecafluorooctyl)silyl]oxy]methyl]-2-[[(1-oxoallyl)oxy]methyl]-1,3-propanediyl diacrylate		CAS_RN: 94237-11-3	O=C(OCC(COC(=O)C=C)(COC(=O)C=C)CO[Si](C)(C)CCC(F)(F)C(F)(F)C(F)(F)C(F)(F)C(F)(F)C(F)(F)F)C=C	C=CC(=O)OCC(COC(=O)C=C)(COC(=O)C=C)CO[Si](C)(C)CCC(F)(F)C(F)(F)C(F)(F)C(F)(F)C(F)(F)C(F)(F)F	C24H27F13O7Si	0.9378	1871.64	6.9686	12.7406	200.723	721.298	3.50786	0	-1.07835	29.5612	-2.44437	0	1.26966	TRUE	1	0
537	perfluoroalkanesulfonamido sulfonate betaine E, n=6		NA	S(N(CCO)CCC[N+](CC(O)CS(=O)(O)=O)(C)C)(=O)(=O)C(F)(F)C(F)(F)C(F)(F)C(F)(F)C(F)(F)C(F)(F)F	C[N+](C)(CCCN(CCO)S(=O)(=O)C(F)(F)C(F)(F)C(F)(F)C(F)(F)C(F)(F)C(F)(F)F)CC(O)CS(=O)(=O)O	C16H23F13N2O7S2	-1.2632	2091.4	7.47342	12.8489	156.295	1911.88	3.29554	9.6997	0	3.2463	-1.53191	1	1.23818	TRUE	1	0
538	multiple double bond-perfluoroalkyl (linear) carboxylic acids, n=2		NA	F/C(C(F)(F)C(F)(F)C(O)=O)=C(F)C(F)=C(F)F	O=C(O)C(F)(F)C(F)(F)C(F)=C(F)C(F)=C(F)F	C7HF9O2	2.0016	828.53	1	11.6331	233.041	70.088	2.22105	7.6597	-3.95815	-62.1873	0	1	1.01526	TRUE	1	0
539	Ammonium nonadecafluorodecanoate		CAS_RN: 3108-42-7	[NH4+].[O-]C(=O)C(F)(F)C(F)(F)C(F)(F)C(F)(F)C(F)(F)C(F)(F)C(F)(F)C(F)(F)C(F)(F)F	O=C(O)C(F)(F)C(F)(F)C(F)(F)C(F)(F)C(F)(F)C(F)(F)C(F)(F)C(F)(F)C(F)(F)F	C10HF19O2	1.0078	2448.06	13.1851	12.9448	232.861	100.739	2.84477	7.606	-4.47501	-112.159	0	1	0.626693	TRUE	1	0
540	Octan-2-yl heptafluorobutanoate		CAS_RN: 560-01-0	CCCCCCC(C)OC(=O)C(F)(F)C(F)(F)C(F)(F)F	CCCCCCC(C)OC(=O)C(F)(F)C(F)(F)C(F)(F)F	C12H17F7O2	-3.2158	757.75	2.3811	11.6882	142.124	2444.49	2.72966	0	-2.86776	21.8204	0.110525	0	1.95457	FALSE	0	0
541	2,4-Dichloro-N-(3-{[4-(1,1,1,2,3,3,3-heptafluoropropan-2-yl)-2,6-dimethylphenyl]carbamoyl}phenyl)benzamide		CAS_RN: 862130-69-6	Cc1cc(cc(C)c1NC(=O)c1cccc(NC(=O)c2ccc(Cl)cc2Cl)c1)C(F)(C(F)(F)F)C(F)(F)F	Cc1cc(C(F)(C(F)(F)F)C(F)(F)F)cc(C)c1NC(=O)c1cccc(NC(=O)c2ccc(Cl)cc2Cl)c1	C25H17Cl2F7N2O2	1.7808	1181.36	2.3811	12.5595	202.034	-269.135	3.34858	0	-0.732144	107.408	0	0	1.49052	FALSE	0	0
542	[4-(3,3,4,4,5,5,6,6,7,7,8,8,9,9,10,10,10-Heptadecafluorodecyl)phenyl]methanol		CAS_RN: 356055-77-1	OCC1=CC=C(CCC(F)(F)C(F)(F)C(F)(F)C(F)(F)C(F)(F)C(F)(F)C(F)(F)C(F)(F)F)C=C1	OCc1ccc(CCC(F)(F)C(F)(F)C(F)(F)C(F)(F)C(F)(F)C(F)(F)C(F)(F)C(F)(F)F)cc1	C17H11F17O	1.0974	2136.75	11.2406	12.8639	188.616	2120.56	3.08474	8.7803	0	5.7087	-2.523	0	1.20271	TRUE	1	0
543	6-8-phosphinic		NA	C(C(C(C(C(F)(F)P(=O)(C(C(C(C(C(C(F)(F)F)(F)F)(F)F)(F)F)(F)F)(F)F)O)(F)F)(F)F)(F)F)(C(C(C(F)(F)F)(F)F)(F)F)(F)F	O=P(O)(C(F)(F)C(F)(F)C(F)(F)C(F)(F)C(F)(F)C(F)(F)F)C(F)(F)C(F)(F)C(F)(F)C(F)(F)C(F)(F)C(F)(F)C(F)(F)C(F)(F)F	C14HF30O2P	0.9824	3999.82	21.3073	13.4873	238.527	154.058	3.39296	8.5091	0	-141.35	0	1	0.849249	TRUE	1	0
544	n:2 fluorotelomer thio alkyl amido ammonium_i, n=5		NA	FC(F)(F)C(F)(F)C(F)(F)C(F)(F)C(F)(F)C(F)(F)C(F)(F)C(F)(F)C(F)(F)C(F)(F)CCSCC(NCCC[N+](C)(C)C)=O	C[N+](C)(C)CCCNC(=O)CSCCC(F)(F)C(F)(F)C(F)(F)C(F)(F)C(F)(F)C(F)(F)C(F)(F)C(F)(F)C(F)(F)C(F)(F)F	C20H21F21N2OS	-2.0502	2780.22	15.1596	13.0988	177.797	2777.79	3.41212	0	-0.836782	-32.0884	-2.6053	0	1.65272	FALSE	0	0
545	Methyl 5,5,6,6,7,7,8,8,9,9,9-undecafluoro-4-oxononanoate		CAS_RN: 1456734-51-2	COC(=O)CCC(=O)C(F)(F)C(F)(F)C(F)(F)C(F)(F)C(F)(F)F	COC(=O)CCC(=O)C(F)(F)C(F)(F)C(F)(F)C(F)(F)C(F)(F)F	C10H7F11O3	-2.7034	1324.56	5.67624	12.2964	189.531	1095.69	2.68254	0	-3.14301	-13.8229	-1.8582	0	1.38985	FALSE	0	0
546	Perfluoro-11-(trifluoromethyl)dodecanoic acid		CAS_RN: 16486-96-7	O=C(C(C(C(C(C(C(C(C(C(C(C(F)(F)F)(F)C(F)(F)F)(F)F)(F)F)(F)F)(F)F)(F)F)(F)F)(F)F)(F)F)(F)F)O	O=C(O)C(F)(F)C(F)(F)C(F)(F)C(F)(F)C(F)(F)C(F)(F)C(F)(F)C(F)(F)C(F)(F)C(F)(C(F)(F)F)C(F)(F)F	C13HF25O2	0.8081	3916.75	19.68	13.313	237.236	-19.4699	3.21821	7.6361	-4.68227	-113.674	0	1	0.855567	TRUE	1	0
547	(8E)-1,1,1,2,2,3,3,4,4,5,5,6,6,7,7,10,10,11,11,12,12,13,13,14,14,15,15,16,16,16-Triacontafluorohexadec-8-ene		CAS_RN: 35709-15-0	FC(F)(F)C(F)(F)C(F)(F)C(F)(F)C(F)(F)C(F)(F)C(F)(F)C=CC(F)(F)C(F)(F)C(F)(F)C(F)(F)C(F)(F)C(F)(F)C(F)(F)F	FC(F)(F)C(F)(F)C(F)(F)C(F)(F)C(F)(F)C(F)(F)C(F)(F)C=CC(F)(F)C(F)(F)C(F)(F)C(F)(F)C(F)(F)C(F)(F)C(F)(F)F	C16H2F30	-0.569	3415.5	19.768	13.3165	231.367	361.671	3.35647	0	0	-140.06	0	0	1.20501	TRUE	1	0
548	4-[Methyl[(pentadecafluoroheptyl)sulfonyl]amino]butyl methacrylate		CAS_RN: 67906-38-1	C(N([S](=O)(=O)C(F)(F)C(F)(F)C(F)(F)C(F)(F)C(F)(F)C(F)(F)C(F)(F)F)C)CCCOC(=O)C(=C)C	C=C(C)C(=O)OCCCCN(C)S(=O)(=O)C(F)(F)C(F)(F)C(F)(F)C(F)(F)C(F)(F)C(F)(F)C(F)(F)F	C16H16F15NO4S	-2.7751	2177.83	9.33326	12.8738	188.438	2077.44	3.28	0	-0.959987	-17.6893	-1.22295	0	1.4514	FALSE	0	0
549	(1H,1H,2H,2H-perfluorooctyl)triacetoxysilane		CAS_RN: 1034681-41-8	CC(=O)O[Si](CCC(F)(F)C(F)(F)C(F)(F)C(F)(F)C(F)(F)C(F)(F)F)(OC(C)=O)OC(C)=O	CC(=O)O[Si](CCC(F)(F)C(F)(F)C(F)(F)C(F)(F)C(F)(F)C(F)(F)F)(OC(C)=O)OC(C)=O	C14H13F13O6Si	-2.645	1703.19	7.47342	12.6546	203.826	123.415	3.30809	0	-1.52006	7.3817	-2.8417	0	1.37136	FALSE	0	0
550	1,1,2,2-Tetrafluoro-2-(trifluoromethoxy)-N,N-bis(trifluoromethyl)ethanamine		CAS_RN: 160228-75-1	FC(F)(F)OC(F)(F)C(F)(F)N(C(F)(F)F)C(F)(F)F	FC(F)(F)OC(F)(F)C(F)(F)N(C(F)(F)F)C(F)(F)F	C5F13NO	-5.8534	1889.25	3.95055	12.04	201.064	-142.919	1.58175	0	0	59.3671	0	0	1.91575	FALSE	0	0
551	Tris{4-[1,1,2,3,3,3-hexafluoro-2-(heptafluoropropoxy)propyl]phenyl}phosphane		CAS_RN: 62512-90-7	FC(F)(F)C(F)(F)C(F)(F)OC(F)(C(F)(F)F)C(F)(F)C1=CC=C(C=C1)P(C1=CC=C(C=C1)C(F)(F)C(F)(OC(F)(F)C(F)(F)C(F)(F)F)C(F)(F)F)C1=CC=C(C=C1)C(F)(F)C(F)(OC(F)(F)C(F)(F)C(F)(F)F)C(F)(F)F	FC(F)(F)C(F)(F)C(F)(F)OC(F)(C(F)(F)F)C(F)(F)c1ccc(P(c2ccc(C(F)(F)C(F)(OC(F)(F)C(F)(F)C(F)(F)F)C(F)(F)F)cc2)c2ccc(C(F)(F)C(F)(OC(F)(F)C(F)(F)C(F)(F)F)C(F)(F)F)cc2)cc1	C36H12F39O3P	0.033	4060.13	17.7833	13.6812	240.581	1225.51	3.77133	0	0	227.007	0	0	1.96708	FALSE	0	0
552	1-(Heptafluoropropyl)isoquinoline		CAS_RN: 70414-12-9	FC(F)(F)C(F)(F)C(F)(F)c1nccc2ccccc12	FC(F)(F)C(F)(F)C(F)(F)c1nccc2ccccc12	C12H6F7N	0.1313	671.58	2.3811	12.1076	212.47	983.794	2.49807	0	0	49.6144	0	0	1.41839	FALSE	0	0
553	2,3,4,5,5,5-Hexafluoro-2,3,4-tris(trifluoromethyl)pentanoic acid		CAS_RN: 1882109-72-9	OC(=O)C(F)(C(F)(F)F)C(F)(C(F)(F)F)C(F)(C(F)(F)F)C(F)(F)F	O=C(O)C(F)(C(F)(F)F)C(F)(C(F)(F)F)C(F)(C(F)(F)F)C(F)(F)F	C8HF15O2	1.2039	2419.63	10.6713	12.8519	202.853	-73.5279	2.6539	7.8255	-4.82375	28.6468	0	1	0.889074	TRUE	1	0
554	Benzenamine, 4-(heptadecafluorooctyl)-N,N-dimethyl-		CAS_RN: 80791-09-9	CN(C)C1=CC=C(C=C1)C(F)(F)C(F)(F)C(F)(F)C(F)(F)C(F)(F)C(F)(F)C(F)(F)C(F)(F)F	CN(C)c1ccc(C(F)(F)C(F)(F)C(F)(F)C(F)(F)C(F)(F)C(F)(F)C(F)(F)C(F)(F)F)cc1	C16H10F17N	-1.434	2160.42	11.2406	12.9339	191.8	1587.21	3.05421	0	0	-17.4227	0	0	1.31288	TRUE	1	0
555	Perfluoro-2-methyl-3-oxahexanoic acid	HFPO-DA	CAS_RN: 13252-13-6	O=C(C(OC(C(C(F)(F)F)(F)F)(F)F)(C(F)(F)F)F)O	O=C(O)C(F)(OC(F)(F)C(F)(F)C(F)(F)F)C(F)(F)F	C6HF11O3	-0.1826	1048.88	4.5088	12.0508	225.844	101.284	2.36147	7.7205	-3.88644	-16.9093	0	1	0.850589	TRUE	1	1
556	4-(Tridecafluorohexyl)phenol		CAS_RN: 106877-15-0	Oc1ccc(cc1)C(F)(F)C(F)(F)C(F)(F)C(F)(F)C(F)(F)C(F)(F)F	Oc1ccc(C(F)(F)C(F)(F)C(F)(F)C(F)(F)C(F)(F)C(F)(F)F)cc1	C12H5F13O	1.7692	1528.96	7.47342	12.5863	213.13	983.187	2.62187	8.7858	0	2.9928	0	0	0.93085	TRUE	1	0
557	Silane, (heptadecafluorooctyl)trimethyl-		CAS_RN: 52112-19-3	C[Si](C)(C)C(F)(F)C(F)(F)C(F)(F)C(F)(F)C(F)(F)C(F)(F)C(F)(F)C(F)(F)F	C[Si](C)(C)C(F)(F)C(F)(F)C(F)(F)C(F)(F)C(F)(F)C(F)(F)C(F)(F)C(F)(F)F	C11H9F17Si	8.2629	2171.16	11.2406	12.8772	209.045	1399.27	2.7794	0	0	-22.303	0	0	1.85947	FALSE	0	0
558	perfluoroalkanesulfonamido betaine B, n=3		NA	S(NCCC[N+](CCC(O)=O)(C)C)(=O)(=O)C(F)(F)C(F)(F)C(F)(F)F	C[N+](C)(CCCNS(=O)(=O)C(F)(F)C(F)(F)C(F)(F)F)CCC(=O)O	C11H17F7N2O4S	-2.971	944.95	2.3811	12.0046	132.173	1264.65	2.95952	8.5446	-1.08905	23.0969	-0.752994	1	1.51786	FALSE	0	0
559	Perfluoromethoxypropionic acid methyl ester		CAS_RN: 356-69-4	COC(=O)C(F)(F)C(F)(F)OC(F)(F)F	COC(=O)C(F)(F)C(F)(F)OC(F)(F)F	C5H3F7O3	-6.6958	700.08	1.65096	11.3838	179.517	186.999	1.58175	0	-2.83634	18.3663	0	0	2.09374	FALSE	0	0
560	PFDPA	PFDPA	CAS_RN: 52299-26-0	C(C(C(C(C(C(F)(F)P(=O)(O)O)(F)F)(F)F)(F)F)(F)F)(C(C(C(C(F)(F)F)(F)F)(F)F)(F)F)(F)F	O=P(O)(O)C(F)(F)C(F)(F)C(F)(F)C(F)(F)C(F)(F)C(F)(F)C(F)(F)C(F)(F)C(F)(F)C(F)(F)F	C10H2F21O3P	2.198	2844	15.1596	13.1242	231.233	192.042	3.02885	7.9561	0	-118.454	0	2	0.794508	TRUE	1	1
561	Glycine, N-ethyl-N-[(tridecafluorohexyl)sulfonyl]-, ethyl ester		CAS_RN: 68957-53-9	C(N([S](=O)(=O)C(F)(F)C(F)(F)C(F)(F)C(F)(F)C(F)(F)C(F)(F)F)CC(=O)OCC)C	CCOC(=O)CN(CC)S(=O)(=O)C(F)(F)C(F)(F)C(F)(F)C(F)(F)C(F)(F)C(F)(F)F	C12H12F13NO4S	-3.3949	1819.67	7.47342	12.7371	184.278	1727.91	3.08753	0	-1.66413	-35.4789	-1.76846	0	1.45332	FALSE	0	0
562	3-(Perfluorododecyl)-2-hydroxypropyl dihydrogen phosphate		CAS_RN: 94200-42-7	C(C(F)(F)C(F)(F)C(F)(F)C(F)(F)C(F)(F)C(F)(F)C(F)(F)C(F)(F)C(F)(F)C(F)(F)C(F)(F)C(F)(F)F)C(O)CO[P](O)(O)=O	O=P(O)(O)OCC(O)CC(F)(F)C(F)(F)C(F)(F)C(F)(F)C(F)(F)C(F)(F)C(F)(F)C(F)(F)C(F)(F)C(F)(F)C(F)(F)C(F)(F)F	C15H8F25O5P	1.2216	3397.11	19.1782	13.3037	212.905	752.945	3.3771	8.9137	0	-105.597	-3.56697	2	1.10092	TRUE	1	0
563	Perfluoro-2-methylheptane		CAS_RN: 153273-32-6	FC(F)(F)C(F)(F)C(F)(F)C(F)(F)C(F)(F)C(F)(C(F)(F)F)C(F)(F)F	FC(F)(F)C(F)(F)C(F)(F)C(F)(F)C(F)(F)C(F)(C(F)(F)F)C(F)(F)F	C8F18	-1.0143	2594.25	11.7549	12.7892	232.189	-95.6253	2.63567	0	0	-52.358	0	0	1.12833	TRUE	1	0
564	2,2,3,3,4,4,4-Heptafluoro-N-(2-iodophenyl)butanamide		CAS_RN: 378215-44-2	FC(F)(F)C(F)(F)C(F)(F)C(=O)Nc1ccccc1I	O=C(Nc1ccccc1I)C(F)(F)C(F)(F)C(F)(F)F	C10H5F7INO	0.9994	703.62	2.3811	11.8396	237.496	-1298.28	2.60505	0	-2.68866	33.5057	0	0	1.48659	FALSE	0	0
565	(2-Carboxylatoethyl)-3-((perfluoro-11-methyldodecyl)-2-hydroxypropyl)aminopropyldimethylammonium		CAS_RN: 93776-15-9	C[N+](CCCNCC(O)CC(F)(F)C(F)(F)C(F)(F)C(F)(F)C(F)(F)C(F)(F)C(F)(F)C(F)(F)C(F)(F)C(F)(F)C(C(F)(F)F)(F)C(F)(F)F)(CCC(O)=O)C	C[N+](C)(CCCNCC(O)CC(F)(F)C(F)(F)C(F)(F)C(F)(F)C(F)(F)C(F)(F)C(F)(F)C(F)(F)C(F)(F)C(F)(F)C(F)(C(F)(F)F)C(F)(F)F)CCC(=O)O	C24H23F27N2O3	-0.8856	4405.52	21.7082	13.4459	172.367	3851.96	3.44294	9.4784	-1.24203	-37.2245	-3.29194	1	1.81579	FALSE	0	0
566	Poly(difluoromethylene), .alpha.,.alpha.'-[phosphinicobis(oxy-2,1-ethanediyl)]bis[.omega.-fluoro-|Ethanol, 2,2'-iminobis-, compd. with .alpha.,.alpha.'-[phosphinicobis(oxy-2,1-ethanediyl)]bis[.omega.-fluoropoly(difluoromethylene)] (1:1)		CAS_RN: 65530-62-3|65530-64-5	C(COP(=O)(O)OCCC(F)(F)F)C(F)(F)F	O=P(O)(OCCC(F)(F)F)OCCC(F)(F)F	C6H9F6O4P	-4.2681	386.78	0.125	10.7583	178.073	-1206.95	1.8313	8.808	0	62.0152	-1.46896	1	1.87867	FALSE	0	0
567	1,1,1,2,2,3,3,4,4,10,10,11,11,12,12,13,13,13-Octadecafluoro-6,8-diiodotridecane		CAS_RN: 40735-21-5	FC(F)(F)C(F)(F)C(F)(F)C(F)(F)CC(I)CC(I)CC(F)(F)C(F)(F)C(F)(F)C(F)(F)F	FC(F)(F)C(F)(F)C(F)(F)C(F)(F)CC(I)CC(I)CC(F)(F)C(F)(F)C(F)(F)C(F)(F)F	C13H8F18I2	-0.767	1702.45	6.74168	12.616	211.307	-13448.1	3.44377	0	0	29.6556	-2.38372	0	5.48159	FALSE	0	0
568	1H-Perfluorononane		CAS_RN: 375-94-0	FC(F)C(F)(F)C(F)(F)C(F)(F)C(F)(F)C(F)(F)C(F)(F)C(F)(F)C(F)(F)F	FC(F)C(F)(F)C(F)(F)C(F)(F)C(F)(F)C(F)(F)C(F)(F)C(F)(F)C(F)(F)F	C9HF19	-0.9968	2196.5	11.2406	12.8044	227.976	9.67898	2.71597	0	0	-113.088	0	0	1.10877	TRUE	1	0
569	4,4,5,5,6,6,7,7,8,9,9,9-Dodecafluoro-2-(2-hydroxypropyl)-8-(trifluoromethyl)non-2-enoate		CAS_RN: 16083-75-3	CC(O)CC(=CC(F)(F)C(F)(F)C(F)(F)C(F)(F)C(F)(C(F)(F)F)C(F)(F)F)C([O-])=O	CC(O)CC(=CC(F)(F)C(F)(F)C(F)(F)C(F)(F)C(F)(C(F)(F)F)C(F)(F)F)C(=O)O	C13H9F15O3	1.4485	2428.06	9.83452	12.7726	206.123	1234.89	3.1841	8.8419	-2.6279	17.0678	-1.52667	1	0.716937	TRUE	1	0
570	2,2,3,3,4,4,5,5,6,6,7,7,8,8,9,9,9-Heptadecafluoro-N-(4-nitrophenyl)nonanamide		CAS_RN: 164796-46-7	[O-][N+](=O)c1ccc(NC(=O)C(F)(F)C(F)(F)C(F)(F)C(F)(F)C(F)(F)C(F)(F)C(F)(F)C(F)(F)F)cc1	O=C(Nc1ccc([N+](=O)[O-])cc1)C(F)(F)C(F)(F)C(F)(F)C(F)(F)C(F)(F)C(F)(F)C(F)(F)C(F)(F)F	C15H5F17N2O3	0.6162	2278.38	11.2406	12.9394	224.576	1127.19	3.20905	0	-3.75229	-38.0085	0	0	1.13733	TRUE	1	0
571	Undecafluorohexanoyl chloride		CAS_RN: 335-53-5	FC(F)(F)C(F)(F)C(F)(F)C(F)(F)C(F)(F)C(Cl)=O	O=C(Cl)C(F)(F)C(F)(F)C(F)(F)C(F)(F)C(F)(F)F	C6ClF11O	-1.0861	1160.28	5.67624	12.2042	244.348	-33.5632	2.38781	0	-2.82702	-57.9995	0	0	1.21486	TRUE	1	0
572	Perfluoro-3-(1H-perfluoroethoxy)propane		CAS_RN: 3330-15-2	FC(OC(F)(F)C(F)(F)C(F)(F)F)C(F)(F)F	FC(OC(F)(F)C(F)(F)C(F)(F)F)C(F)(F)F	C5HF11O	-3.7828	697.81	2.7016	11.6619	217.496	-20.5612	1.58175	0	0	-34.1192	0	0	1.65961	FALSE	0	0
573	3-(Heptafluoroisopropoxy)propyltriethoxysilane		CAS_RN: 149838-19-7	CCO[Si](CCCOC(F)(C(F)(F)F)C(F)(F)F)(OCC)OCC	CCO[Si](CCCOC(F)(C(F)(F)F)C(F)(F)F)(OCC)OCC	C12H21F7O4Si	-2.9924	865.72	2.3811	11.7924	148.638	1134.05	3.11283	0	0	74.8419	-1.1028	0	1.82328	FALSE	0	0
574	n:2 fluorotelomer thio alkyl amido ammonium_i, n=4		NA	FC(F)(F)C(F)(F)C(F)(F)C(F)(F)C(F)(F)C(F)(F)C(F)(F)C(F)(F)CCSCC(NCCC[N+](C)(C)C)=O	C[N+](C)(C)CCCNC(=O)CSCCC(F)(F)C(F)(F)C(F)(F)C(F)(F)C(F)(F)C(F)(F)C(F)(F)C(F)(F)F	C18H21F17N2OS	-2.4052	2185.09	11.2406	12.8446	168.843	2300.04	3.32875	0	-0.742558	-9.2077	-2.43201	0	1.60507	FALSE	0	0
575	10:2 Fluorotelomer unsaturated aldehyde		CAS_RN: 864551-40-6	C(=C(/C(C(C(C(C(C(C(C(C(F)(F)F)(F)F)(F)F)(F)F)(F)F)(F)F)(F)F)(F)F)(F)F)F)C=O	O=CC=C(F)C(F)(F)C(F)(F)C(F)(F)C(F)(F)C(F)(F)C(F)(F)C(F)(F)C(F)(F)C(F)(F)F	C12H2F20O	-0.7896	2504.81	13.1851	12.97	233.464	375.492	2.98149	0	-4.09538	-109.587	0	0	1.12672	TRUE	1	0
576	3,4,4,5,5,6,6,7,7,8,8,9,9,10,10,11,11,12,12,12-Icosafluorododec-2-enal		CAS_RN: 864551-40-6	FC(=CC=O)C(F)(F)C(F)(F)C(F)(F)C(F)(F)C(F)(F)C(F)(F)C(F)(F)C(F)(F)C(F)(F)F	O=CC=C(F)C(F)(F)C(F)(F)C(F)(F)C(F)(F)C(F)(F)C(F)(F)C(F)(F)C(F)(F)C(F)(F)F	C12H2F20O	-0.7896	2504.81	13.1851	12.97	233.464	375.492	2.98149	0	-4.09538	-109.587	0	0	1.12672	TRUE	1	0
577	H-substituted Perfluoroalkyl (linear) carboxylic acids_i, n=7		NA	C(O)(=O)C(F)C(F)(F)C(F)(F)C(F)(F)C(F)(F)C(F)(F)C(F)(F)C(F)(F)F	O=C(O)C(F)C(F)(F)C(F)(F)C(F)(F)C(F)(F)C(F)(F)C(F)(F)C(F)(F)F	C9H2F16O2	0.9403	2024.19	9.33326	12.6998	223.674	84.0309	2.70107	7.7076	-3.70262	-88.6192	0	1	0.490144	TRUE	1	0
578	2-Chloro-3,3,4,4,5,5,6,6,6-nonafluorohex-1-ene		CAS_RN: 110927-72-5	FC(F)(F)C(F)(F)C(F)(F)C(F)(F)C(Cl)=C	C=C(Cl)C(F)(F)C(F)(F)C(F)(F)C(F)(F)F	C6H2ClF9	-1.5907	828.21	3.96541	11.8888	211.454	-367.41	2.34415	0	-1.62677	-28.0703	0	0	1.31584	TRUE	1	0
579	1-Bromoperfluorobutane		CAS_RN: 375-48-4	FC(F)(F)C(F)(F)C(F)(F)C(F)(F)Br	FC(F)(F)C(F)(F)C(F)(F)C(F)(F)Br	C4BrF9	-1.3904	708.37	3.96541	11.6883	235.661	-459.868	1.58175	0	0	-53.4843	0	0	1.49774	FALSE	0	0
580	1-Iodo-1H,1H-perfluorooctane		CAS_RN: 10258-49-8	FC(F)(F)C(F)(F)C(F)(F)C(F)(F)C(F)(F)C(F)(F)C(F)(F)CI	FC(F)(F)C(F)(F)C(F)(F)C(F)(F)C(F)(F)C(F)(F)C(F)(F)CI	C8H2F15I	-0.9571	1660.74	9.33326	12.5859	236.119	-212.468	2.7058	0	0	-68.1236	-2.09659	0	1.17155	TRUE	1	0
581	2-Chloro-2-propenoic acid 3,3,4,4,5,5,6,6,6-nonafluorohexyl ester		CAS_RN: 701909-41-3	[H]C([H])=C(Cl)C(=O)OCCC(F)(F)C(F)(F)C(F)(F)C(F)(F)F	C=C(Cl)C(=O)OCCC(F)(F)C(F)(F)C(F)(F)C(F)(F)F	C9H6ClF9O2	-2.8251	934.39	3.96541	11.9145	188.346	322.915	2.61931	0	-1.20813	-4.5226	-2.19939	0	1.45336	FALSE	0	0
582	Potassium 3,3,4,4,5,5,6,6,7,7,8,8,9,9,10,10,10-heptadecafluorodecyl sulfate		CAS_RN: 1262446-13-8	[K+].[O-]S(=O)(=O)OCCC(F)(F)C(F)(F)C(F)(F)C(F)(F)C(F)(F)C(F)(F)C(F)(F)C(F)(F)F	O=S(=O)(O)OCCC(F)(F)C(F)(F)C(F)(F)C(F)(F)C(F)(F)C(F)(F)C(F)(F)C(F)(F)F	C10H5F17O4S	-1.0623	2133.93	11.2406	12.8173	208.199	306.419	2.96156	8.0967	0	-68.8174	-3.09577	1	0.795518	TRUE	1	0
583	3-(Perfluorooctyl)propylamine		CAS_RN: 139175-50-1	NCCCC(F)(F)C(F)(F)C(F)(F)C(F)(F)C(F)(F)C(F)(F)C(F)(F)C(F)(F)F	NCCCC(F)(F)C(F)(F)C(F)(F)C(F)(F)C(F)(F)C(F)(F)C(F)(F)C(F)(F)F	C11H8F17N	1.0375	2053.38	11.2406	12.7791	197.47	2450.33	2.85919	0	0	-59.8548	-2.48329	0	1.42333	FALSE	0	0
584	multiple H-substituted, multiple ether-substituted perfluoroalkyl alcohols, n=6, m=19		NA	FC(F)(F)C(F)(F)C(F)(F)C(F)(F)C(F)(F)C(F)(F)C(F)(F)C(F)(F)C(F)(F)C(F)(F)C(F)(F)C(F)(F)CCOCCOCCOCCOCCOCCOCCOCCOCCOCCOCCOCCOCCOCCOCCOCCOCCOCCOCCO[H]	OCCOCCOCCOCCOCCOCCOCCOCCOCCOCCOCCOCCOCCOCCOCCOCCOCCOCCOCCC(F)(F)C(F)(F)C(F)(F)C(F)(F)C(F)(F)C(F)(F)C(F)(F)C(F)(F)C(F)(F)C(F)(F)C(F)(F)C(F)(F)F	C50H77F25O19	-5.4615	3775	19.1782	13.3521	136.103	6211.64	3.49433	8.5945	0	-76.8606	-2.9833	0	2.92193	FALSE	0	0
585	(1H,1H-Perfluoroethyl)(2H-perfluoroethyl)ether		CAS_RN: 406-78-0	FC(F)C(F)(F)OCC(F)(F)F	FC(F)C(F)(F)OCC(F)(F)F	C4H3F7O	-6.135	111.83	0.333333	10.5389	161.391	-366.457	1.58175	0	0	-5.5999	-2.39847	0	2.30299	FALSE	0	0
586	2,2,3,3,4,4,4-Heptafluoro-N'-phenylbutanehydrazide		CAS_RN: 77146-66-8	FC(F)(F)C(F)(F)C(F)(F)C(=O)NNc1ccccc1	O=C(NNc1ccccc1)C(F)(F)C(F)(F)C(F)(F)F	C10H7F7N2O	1.7601	725.58	2.3811	11.7381	181.666	1092.07	2.61918	0	-2.80215	12.6567	0	0	1.43877	FALSE	0	0
587	Sodium 2-((undecafluoropentylsulphonylamino)methyl)benzenesulphonate		CAS_RN: 68299-20-7	[Na+].[H]N(CC1=CC=CC=C1S([O-])(=O)=O)S(=O)(=O)C(F)(F)C(F)(F)C(F)(F)C(F)(F)C(F)(F)F	O=S(=O)(O)c1ccccc1CNS(=O)(=O)C(F)(F)C(F)(F)C(F)(F)C(F)(F)C(F)(F)F	C12H8F11NO5S2	1.8689	1555.93	5.67624	12.6384	193.65	810.55	2.98038	9.0589	0	22.8338	-1.60029	1	0.871305	TRUE	1	0
588	Perfluoro-3,6-dimethyl-1,4-dioxan-2-one		CAS_RN: 7309-84-4	FC(F)(F)C1(F)OC(F)(F)C(F)(OC1=O)C(F)(F)F	O=C1OC(F)(C(F)(F)F)C(F)(F)OC1(F)C(F)(F)F	C6F10O3	-2.9377	1061.29	4.5088	12.3232	230.1	-10.5615	2.22817	0	-3.63356	7.8008	0	0	1.43492	FALSE	0	0
589	N-Butyl-2,2,3,3,4,4,5,5,6,6,7,7,8,8,8-pentadecafluorooctanamide		CAS_RN: 37696-83-6	CCCCNC(=O)C(F)(F)C(F)(F)C(F)(F)C(F)(F)C(F)(F)C(F)(F)C(F)(F)F	CCCCNC(=O)C(F)(F)C(F)(F)C(F)(F)C(F)(F)C(F)(F)C(F)(F)C(F)(F)F	C12H10F15NO	-1.1095	1885.15	9.33326	12.6857	193.894	3201.24	2.89338	0	-3.37748	-44.5463	-0.897547	0	1.5896	FALSE	0	0
590	2,2,3,3,4,4,5,5,6,6,7,7,7-Tridecafluoro-N-[(4-sulfamoylphenyl)methyl]heptanamide		CAS_RN: 165618-99-5	NS(=O)(=O)c1ccc(CNC(=O)C(F)(F)C(F)(F)C(F)(F)C(F)(F)C(F)(F)C(F)(F)F)cc1	NS(=O)(=O)c1ccc(CNC(=O)C(F)(F)C(F)(F)C(F)(F)C(F)(F)C(F)(F)C(F)(F)F)cc1	C14H9F13N2O3S	2.6031	1721.48	7.47342	12.6719	188.154	873.576	3.06409	0	-3.4409	15.0971	-1.23743	0	1.27429	TRUE	1	0
591	Perfluorododecanoic acid (PFDoDA)	PFDoDA	CAS_RN: 307-55-1	OC(=O)C(F)(F)C(F)(F)C(F)(F)C(F)(F)C(F)(F)C(F)(F)C(F)(F)C(F)(F)C(F)(F)C(F)(F)C(F)(F)F	O=C(O)C(F)(F)C(F)(F)C(F)(F)C(F)(F)C(F)(F)C(F)(F)C(F)(F)C(F)(F)C(F)(F)C(F)(F)C(F)(F)F	C12HF23O2	0.8654	3043.19	17.1586	13.1774	236.102	98.7857	3.05869	7.6267	-4.61672	-138.563	0	1	0.745928	TRUE	1	1
592	1,1,1,2,2,3,3,4,4-Nonafluoro-6-iodohexane		CAS_RN: 2043-55-2	C(C(C(C(C(F)(F)F)(F)F)(F)F)(F)F)CI	FC(F)(F)C(F)(F)C(F)(F)C(F)(F)CCI	C6H4F9I	-1.6964	828.43	3.96541	11.8081	201.546	-2738.77	2.35376	0	0	-10.7974	-1.64992	0	1.81601	FALSE	0	0
593	2,2,3,3,4,4,4-Heptafluoro-1-methoxybutan-1-ol		CAS_RN: 377-52-6	COC(O)C(F)(F)C(F)(F)C(F)(F)F	COC(O)C(F)(F)C(F)(F)C(F)(F)F	C5H5F7O2	-2.75	675.63	2.3811	11.5194	130.14	509.529	1.58175	8.1324	0	-13.6363	0	0	1.74413	FALSE	0	0
594	1-(3,3,4,4,5,5,6,6,7,7,8,8,9,9,10,10,10-Heptadecafluorodecyl)-N,N,N',N',N'',N''-hexamethylsilanetriamine		CAS_RN: 186599-45-1	CN(C)[Si](CCC(F)(F)C(F)(F)C(F)(F)C(F)(F)C(F)(F)C(F)(F)C(F)(F)C(F)(F)F)(N(C)C)N(C)C	CN(C)[Si](CCC(F)(F)C(F)(F)C(F)(F)C(F)(F)C(F)(F)C(F)(F)C(F)(F)C(F)(F)F)(N(C)C)N(C)C	C16H22F17N3Si	-2.439	2241.66	11.2406	12.975	149.155	-970.508	3.06217	0	0	30.0661	-2.40739	0	1.65656	FALSE	0	0
595	Nonafluorobis(trifluoromethyl)cyclohexanesulphonyl fluoride		CAS_RN: 68156-00-3	FC(F)(F)C1(C(F)(F)F)C(F)(F)C(F)(F)C(F)(F)C(F)(F)C1(F)S(=O)(=O)F	O=S(=O)(F)C1(F)C(F)(F)C(F)(F)C(F)(F)C(F)(F)C1(C(F)(F)F)C(F)(F)F	C8F16O2S	-0.7421	3277.46	14.6761	13.3731	203.52	-409.224	2.85408	0	0	20.3574	0	0	1.27159	TRUE	1	0
596	Perfluoropentanoic acid (PFPeA)	PFPeA	CAS_RN: 2706-90-3	O=C(O)C(F)(F)C(F)(F)C(F)(F)C(F)(F)F	O=C(O)C(F)(F)C(F)(F)C(F)(F)C(F)(F)F	C5HF9O2	1.6757	960.25	3.96541	11.8888	196.402	106.295	1.73407	7.4753	-3.79035	-43.0837	0	1	1.01584	TRUE	1	1
597	3-(tert-Butylsulfanyl)-4-(1,1,1,2,3,3,3-heptafluoropropan-2-yl)-2-methylbenzoic acid		CAS_RN: 1355554-16-3	Cc1c(ccc(c1SC(C)(C)C)C(F)(C(F)(F)F)C(F)(F)F)C(O)=O	Cc1c(C(=O)O)ccc(C(F)(C(F)(F)F)C(F)(F)F)c1SC(C)(C)C	C15H15F7O2S	1.8433	1009.36	2.48111	12.3529	216.127	-1207.41	2.90036	9.0873	-1.49122	125.514	0	1	1.30648	TRUE	1	0
598	H-substituted Perfluoroalkyl (linear) carboxylic acids_i, n=4		NA	C(O)(=O)C(F)C(F)(F)C(F)(F)C(F)(F)C(F)(F)F	O=C(O)C(F)C(F)(F)C(F)(F)C(F)(F)C(F)(F)F	C6H2F10O2	1.1421	1131.5	3.96541	12.0076	199.904	56.148	2.27524	7.635	-3.30773	-46.645	0	1	0.800781	TRUE	1	0
599	(6E)-8,8,9,9,10,10,11,11,12,12,13,13,13-Tridecafluorotridec-6-ene		CAS_RN: 350608-60-5	CCCCCC=CC(F)(F)C(F)(F)C(F)(F)C(F)(F)C(F)(F)C(F)(F)F	CCCCCC=CC(F)(F)C(F)(F)C(F)(F)C(F)(F)C(F)(F)C(F)(F)F	C13H13F13	-1.4512	1471.38	7.47342	12.4256	173.089	3305.87	2.84142	0	0	-5.9745	-0.360927	0	1.76792	FALSE	0	0
600	Benzene, (heptadecafluorooctyl)-		CAS_RN: 87405-83-2	FC(F)(F)C(F)(F)C(F)(F)C(F)(F)C(F)(F)C(F)(F)C(F)(F)C(F)(F)C1=CC=CC=C1	FC(F)(F)C(F)(F)C(F)(F)C(F)(F)C(F)(F)C(F)(F)C(F)(F)C(F)(F)c1ccccc1	C14H5F17	0	2100.17	11.2406	12.8834	225.026	1494.85	2.86165	0	0	-21.9069	0	0	1.19789	TRUE	1	0
601	1,1,1,2,2,3,3,4,4,5,5,6,6,7,7,8,8,9,9,10,10,11,11,12,12-Pentacosafluorooctacosane		CAS_RN: 93454-74-1	CCCCCCCCCCCCCCCCC(F)(F)C(F)(F)C(F)(F)C(F)(F)C(F)(F)C(F)(F)C(F)(F)C(F)(F)C(F)(F)C(F)(F)C(F)(F)C(F)(F)F	CCCCCCCCCCCCCCCCC(F)(F)C(F)(F)C(F)(F)C(F)(F)C(F)(F)C(F)(F)C(F)(F)C(F)(F)C(F)(F)C(F)(F)C(F)(F)C(F)(F)F	C28H33F25	-0.729	3387.75	19.1782	13.2831	163.574	8213.27	3.45627	0	0	-20.5063	-2.63034	0	3.39347	FALSE	0	0
602	Perfluorooctylsulfonylpropylaminoethyl acrylate		CAS_RN: 2357-60-0	C(N([S](=O)(=O)C(F)(F)C(F)(F)C(F)(F)C(F)(F)C(F)(F)C(F)(F)C(F)(F)C(F)(F)F)CCOC(=O)C=C)CC	C=CC(=O)OCCN(CCC)S(=O)(=O)C(F)(F)C(F)(F)C(F)(F)C(F)(F)C(F)(F)C(F)(F)C(F)(F)C(F)(F)F	C16H14F17NO4S	-2.6736	2427.09	11.2406	13.0188	194.296	2668.71	3.29363	0	-1.38083	-48.5412	-1.54981	0	1.52689	FALSE	0	0
603	N-Allylperfluorobutanesulfonamide		CAS_RN: 40630-65-7	C(N[S](=O)(=O)C(F)(F)C(F)(F)C(F)(F)C(F)(F)F)C=C	C=CCNS(=O)(=O)C(F)(F)C(F)(F)C(F)(F)C(F)(F)F	C7H6F9NO2S	-0.8513	1098.64	3.96541	12.1584	198.508	1101.14	2.43181	0	0	-20.4678	-1.01194	0	1.29868	TRUE	1	0
604	Methyl 2-(heptafluoropropyl)-2-(trifluoromethyl)pent-4-en-1-		CAS_RN: 83846-71-3	COC(=O)C(CC=C)(C(F)(F)F)C(F)(F)C(F)(F)C(F)(F)F	C=CCC(C(=O)OC)(C(F)(F)F)C(F)(F)C(F)(F)C(F)(F)F	C10H8F10O2	-2.9822	1600.23	5.67624	12.4178	197.924	1006.99	2.61391	0	-2.99183	61.0608	-2.24817	0	1.50732	FALSE	0	0
605	N-methyl perfluoroalkanesulfonamido quaternary ammonium, n=8		NA	S(N(C)CCC[N+](C)(C)C)(=O)(=O)C(F)(F)C(F)(F)C(F)(F)C(F)(F)C(F)(F)C(F)(F)C(F)(F)C(F)(F)F	CN(CCC[N+](C)(C)C)S(=O)(=O)C(F)(F)C(F)(F)C(F)(F)C(F)(F)C(F)(F)C(F)(F)C(F)(F)C(F)(F)F	C15H18F17N2O2S	-4.0799	2433.47	11.2406	13.004	173.128	1897.87	3.16544	0	0	-31.3048	-1.13106	0	1.60938	FALSE	0	0
606	Methyl 4,4,5,5,6,6,7,7,8,8,9,9,10,10,11,11,11-heptadecafluoroundecanoate		CAS_RN: 132424-37-4	COC(=O)CCC(F)(F)C(F)(F)C(F)(F)C(F)(F)C(F)(F)C(F)(F)C(F)(F)C(F)(F)F	COC(=O)CCC(F)(F)C(F)(F)C(F)(F)C(F)(F)C(F)(F)C(F)(F)C(F)(F)C(F)(F)F	C12H7F17O2	-2.0855	2096.38	11.2406	12.8001	201.958	1096.48	2.89752	0	-1.85441	-61.1791	-2.83431	0	1.25751	TRUE	1	0
607	Carboxymethyldimethyl-3-[[(3,3,4,4,5,5,6,6,7,7,8,8,8-tridecafluorooctyl)sulphonyl]amino]propylammonium hydroxide		CAS_RN: 34455-29-3	C[N+](C)(CCCNS(=O)(=O)CCC(F)(F)C(F)(F)C(F)(F)C(F)(F)C(F)(F)C(F)(F)F)CC([O-])=O	C[N+](C)(CCCNS(=O)(=O)CCC(F)(F)C(F)(F)C(F)(F)C(F)(F)C(F)(F)C(F)(F)F)CC(=O)O	C15H19F13N2O4S	-2.025	1707.56	7.47342	12.5995	154.936	809.854	3.26502	8.6888	-1.21841	2.0278	-2.7961	1	1.18972	TRUE	1	0
608	2-Perfluoropropyl-2-propanol		CAS_RN: 355-22-6	CC(C)(O)C(F)(F)C(F)(F)C(F)(F)F	CC(C)(O)C(F)(F)C(F)(F)C(F)(F)F	C6H7F7O	-0.8268	722.25	3.96541	11.6883	135.729	384.695	2.03482	8.5144	0	10.8345	0	0	1.52997	FALSE	0	0
609	Ethyl 4,4,5,5,6,6,6-heptafluorohexanoate		CAS_RN: 424-66-8	CCOC(=O)CCC(F)(F)C(F)(F)C(F)(F)F	CCOC(=O)CCC(F)(F)C(F)(F)C(F)(F)F	C8H9F7O2	-4.0977	622	2.3811	11.466	152.438	974.175	2.31219	0	-1.25912	8.3245	-1.9322	0	1.83482	FALSE	0	0
610	Ammonium tricosafluorododecanoate		CAS_RN: 3793-74-6	[NH4+].[O-]C(=O)C(F)(F)C(F)(F)C(F)(F)C(F)(F)C(F)(F)C(F)(F)C(F)(F)C(F)(F)C(F)(F)C(F)(F)C(F)(F)F	O=C(O)C(F)(F)C(F)(F)C(F)(F)C(F)(F)C(F)(F)C(F)(F)C(F)(F)C(F)(F)C(F)(F)C(F)(F)C(F)(F)F	C12HF23O2	0.8654	3043.19	17.1586	13.1774	236.102	98.7857	3.05869	7.6267	-4.61672	-138.563	0	1	0.745928	TRUE	1	0
611	Perfluoro(4-methoxybutanoic) acid		CAS_RN: 863090-89-5	OC(=O)C(F)(F)C(F)(F)C(F)(F)OC(F)(F)F	O=C(O)C(F)(F)C(F)(F)C(F)(F)OC(F)(F)F	C5HF9O3	-0.3284	1021.56	3.14735	11.7844	206.368	35.2202	1.73407	7.5384	-3.72875	-10.3175	0	1	1.04885	TRUE	1	0
612	(Perfluoropropyl)-2-(2-phenylhydrazinylidene)ethanal phenylhydrazone		CAS_RN: 57912-15-9	FC(F)(F)C(F)(F)C(F)(F)C(C=NNC1=CC=CC=C1)=NNC1=CC=CC=C1	FC(F)(F)C(F)(F)C(F)(F)C(C=NNc1ccccc1)=NNc1ccccc1	C17H13F7N4	1.127	768.78	2.3811	11.9776	200.877	1155.3	2.9424	0	-1.91471	17.6975	0	0	1.33425	TRUE	1	0
613	1H-Pyrrole, 1-methyl-2-(tridecafluorohexyl)-		CAS_RN: 64435-67-2	CN1C=CC=C1C(F)(F)C(F)(F)C(F)(F)C(F)(F)C(F)(F)C(F)(F)F	Cn1cccc1C(F)(F)C(F)(F)C(F)(F)C(F)(F)C(F)(F)C(F)(F)F	C11H6F13N	-1.9651	1529.88	7.47342	12.6144	192.783	1111.83	2.70768	0	0	-23.7719	0	0	1.30583	TRUE	1	0
614	3-(Perfluorooctyl)-2-hydroxypropyl acrylate		CAS_RN: 76962-34-0	OC(COC(=O)C=C)CC(F)(F)C(F)(F)C(F)(F)C(F)(F)C(F)(F)C(F)(F)C(F)(F)C(F)(F)F	C=CC(=O)OCC(O)CC(F)(F)C(F)(F)C(F)(F)C(F)(F)C(F)(F)C(F)(F)C(F)(F)C(F)(F)F	C14H9F17O3	-0.6822	2208.04	11.2406	12.8323	203.982	1558.95	3.0969	8.9968	-1.5431	-49.4659	-3.11432	0	1.00514	TRUE	1	0
615	4,4,5,5,6,6,7,7,8,8,9,9,9-tridecafluorononane-1,2-diol		CAS_RN: 107650-06-6	OCC(O)CC(F)(F)C(F)(F)C(F)(F)C(F)(F)C(F)(F)C(F)(F)F	OCC(O)CC(F)(F)C(F)(F)C(F)(F)C(F)(F)C(F)(F)C(F)(F)F	C9H7F13O2	1.6545	1560.88	7.47342	12.448	187.788	1340.2	2.56695	8.4907	0	-32.459	-2.81968	0	1.09448	TRUE	1	0
616	2,3-Dichloro-1,1,1,2,3,4,5,5,5-nonafluoro-4-(trifluoromethyl)pentane		CAS_RN: 85720-79-2	FC(F)(F)C(F)(Cl)C(F)(Cl)C(F)(C(F)(F)F)C(F)(F)F	FC(F)(F)C(F)(Cl)C(F)(Cl)C(F)(C(F)(F)F)C(F)(F)F	C6Cl2F12	-0.9184	1450.14	7.94418	12.421	247.095	-39.0381	2.40088	0	0	3.7131	0	0	1.2766	TRUE	1	0
617	18-Bromo-1,1,1,2,2,3,3,4,4,5,5,6,6,7,7,8,8-heptadecafluorooctadecane		CAS_RN: 184007-06-5	FC(F)(F)C(F)(F)C(F)(F)C(F)(F)C(F)(F)C(F)(F)C(F)(F)C(F)(F)CCCCCCCCCCBr	FC(F)(F)C(F)(F)C(F)(F)C(F)(F)C(F)(F)C(F)(F)C(F)(F)C(F)(F)CCCCCCCCCCBr	C18H20BrF17	-1.012	2122.48	11.2406	12.8016	166.815	3836.94	3.30113	0	0	-5.4781	-2.32344	0	1.93486	FALSE	0	0
618	2,5-Difluoro-N-(3-{[4-(1,1,1,2,3,3,3-heptafluoropropan-2-yl)-2,6-dimethylphenyl]carbamoyl}phenyl)benzamide		CAS_RN: 862130-67-4	Cc1cc(cc(C)c1NC(=O)c1cccc(NC(=O)c2cc(F)ccc2F)c1)C(F)(C(F)(F)F)C(F)(F)F	Cc1cc(C(F)(C(F)(F)F)C(F)(F)F)cc(C)c1NC(=O)c1cccc(NC(=O)c2cc(F)ccc2F)c1	C25H17F9N2O2	1.8059	1294.86	2.3811	12.5605	199.826	147.285	3.21821	0	-1.02234	87.6113	0	0	1.40536	FALSE	0	0
619	Prop-2-en-1-yl tridecafluoroheptanoate		CAS_RN: 53378-90-8	FC(F)(F)C(F)(F)C(F)(F)C(F)(F)C(F)(F)C(F)(F)C(=O)OCC=C	C=CCOC(=O)C(F)(F)C(F)(F)C(F)(F)C(F)(F)C(F)(F)C(F)(F)F	C10H5F13O2	-2.4829	1571.54	7.47342	12.4947	222.493	1271.73	2.69331	0	-3.58037	-47.0249	-1.31431	0	1.28098	TRUE	1	0
620	((2,2,3,3-Tetrafluoropropoxy)methyl)oxirane		CAS_RN: 19932-26-4	FC(F)C(F)(F)COCC1CO1	FC(F)C(F)(F)COCC1CO1	C6H8F4O2	-4.7209	150.33	0	10.6453	160.256	27.919	1.58175	0	0	-7.3314	-1.24551	0	2.10224	FALSE	0	0
621	1,1,1,2,3,3,3-Heptafluoropropan-2-yl 2-methylprop-2-enoate		CAS_RN: 7459-59-8	CC(=C)C(=O)OC(F)(C(F)(F)F)C(F)(F)F	C=C(C)C(=O)OC(F)(C(F)(F)F)C(F)(F)F	C7H5F7O2	-4.073	811.75	2.3811	11.5895	244.902	450.753	2.21731	0	-2.12764	43.241	0	0	1.68199	FALSE	0	0
622	1,1,2,2,3,3,3-heptafluoro-1-(vinyloxy)propane		CAS_RN: 6996-01-6	FC(F)(F)C(F)(F)C(F)(F)OC=C	C=COC(F)(F)C(F)(F)C(F)(F)F	C5H3F7O	-5.1882	574	2.3811	11.3356	172.131	559.121	1.58175	0	0	-10.2574	0	0	1.95473	FALSE	0	0
623	2-[Ethyl[(heptadecafluorooctyl)sulfonyl]amino]ethyl methacrylate		CAS_RN: 376-14-7	CCN(CCOC(=O)C(C)=C)[S](=O)(=O)C(F)(F)C(F)(F)C(F)(F)C(F)(F)C(F)(F)C(F)(F)C(F)(F)C(F)(F)F	C=C(C)C(=O)OCCN(CC)S(=O)(=O)C(F)(F)C(F)(F)C(F)(F)C(F)(F)C(F)(F)C(F)(F)C(F)(F)C(F)(F)F	C16H14F17NO4S	-2.6736	2460.47	11.2406	13.021	189.966	2002.41	3.24792	0	-1.33953	-44.194	-1.56161	0	1.39838	FALSE	0	0
624	2-Ethyl-4-(1,1,1,2,3,3,3-heptafluoropropan-2-yl)-3-(propylsulfanyl)benzoic acid		CAS_RN: 1355554-68-5	CCCSc1c(CC)c(ccc1C(F)(C(F)(F)F)C(F)(F)F)C(O)=O	CCCSc1c(C(F)(C(F)(F)F)C(F)(F)F)ccc(C(=O)O)c1CC	C15H15F7O2S	1.8433	981.98	2.3811	12.31	209.903	1645.32	3.06278	9.1455	-1.46164	104.903	-0.0853354	1	1.22649	TRUE	1	0
625	Ethyl perfluoropropionate		CAS_RN: 426-65-3	CCOC(=O)C(F)(F)C(F)(F)F	CCOC(=O)C(F)(F)C(F)(F)F	C5H5F5O2	-5.9356	315.88	1	10.9441	161.617	1003.6	1.58175	0	-2.57176	6.3662	-0.52331	0	2.14261	FALSE	0	0
626	[3-[[(heptadecafluorooctyl)sulphonyl]amino]propyl]trimethylammonium hydrogen sulphate		CAS_RN: 70225-26-2	C[N+](C)(C)CCCNS(=O)(=O)C(F)(F)C(F)(F)C(F)(F)C(F)(F)C(F)(F)C(F)(F)C(F)(F)C(F)(F)F.[O-]S(=O)(=O)[O-]	C[N+](C)(C)CCCNS(=O)(=O)C(F)(F)C(F)(F)C(F)(F)C(F)(F)C(F)(F)C(F)(F)C(F)(F)C(F)(F)F	C14H16F17N2O2S	-2.7741	2366.85	11.2406	12.9559	178.852	2554.7	3.12176	0	0	-40.8944	-1.2005	0	1.58445	FALSE	0	0
627	1-Ethenyl-4-(heptadecafluorooctyl)benzene		CAS_RN: 106209-21-6	FC(F)(F)C(F)(F)C(F)(F)C(F)(F)C(F)(F)C(F)(F)C(F)(F)C(F)(F)C1=CC=C(C=C)C=C1	C=Cc1ccc(C(F)(F)C(F)(F)C(F)(F)C(F)(F)C(F)(F)C(F)(F)C(F)(F)C(F)(F)F)cc1	C16H7F17	0	2135.42	11.2406	12.9151	208.976	1667.63	3.01861	0	0	-5.3765	0	0	1.25309	TRUE	1	0
628	1,1,1,2,2,3,3,4,4,5,5,6,6-Tridecafluoro-9-iodononane		CAS_RN: 89889-20-3	FC(F)(F)C(F)(F)C(F)(F)C(F)(F)C(F)(F)C(F)(F)CCCI	FC(F)(F)C(F)(F)C(F)(F)C(F)(F)C(F)(F)C(F)(F)CCCI	C9H6F13I	-1.2658	1441.58	7.47342	12.4096	210.984	-1515.15	2.75986	0	0	-25.3792	-2.05041	0	1.39958	FALSE	0	0
629	1-Iodo-1H,1H,2H,2H-perfluorotetradecane		CAS_RN: 30046-31-2	C(C(C(C(C(C(C(C(C(C(C(C(C(F)(F)F)(F)F)(F)F)(F)F)(F)F)(F)F)(F)F)(F)F)(F)F)(F)F)(F)F)(F)F)CI	FC(F)(F)C(F)(F)C(F)(F)C(F)(F)C(F)(F)C(F)(F)C(F)(F)C(F)(F)C(F)(F)C(F)(F)C(F)(F)C(F)(F)CCI	C14H4F25I	-0.635	3208.93	19.1782	13.256	234.927	-2778.3	3.32566	0	0	-116.735	-2.5756	0	1.71415	FALSE	0	0
630	Prop-2-en-1-yl heptadecafluorononanoate		CAS_RN: 117374-33-1	FC(F)(F)C(F)(F)C(F)(F)C(F)(F)C(F)(F)C(F)(F)C(F)(F)C(F)(F)C(=O)OCC=C	C=CCOC(=O)C(F)(F)C(F)(F)C(F)(F)C(F)(F)C(F)(F)C(F)(F)C(F)(F)C(F)(F)F	C12H5F17O2	-1.9562	2166.67	11.2406	12.8387	229.002	1340.36	2.95974	0	-3.81614	-75.5023	-1.4876	0	1.22224	TRUE	1	0
631	Poly(difluoromethylene), alpha-fluoro-omega-[2-[(2-methyl-1-oxo-2-propenyl)oxy]ethyl]-|2-Propenoic acid, esters, 2-methyl-, dodecyl ester, polymer with .alpha.-fluoro-.omega.-[2-[(2-methyl-1-oxo-2-propen-1-yl)oxy]ethyl]poly(difluoromethylene)|2-Propenoic acid, 2-methyl-, 2-ethylhexyl ester, polymer with a-fluoro-<U+03C9>-[2-[(2-methyl-1-oxo-2-propen-1-yl)oxy]ethyl]poly(difluoromethylene), 2-hydro…	Zonyl	CAS_RN: 65530-66-7|65605-58-5|68239-43-0|65636-35-3	CC(=C)C(=O)OCCC(F)(F)F	C=C(C)C(=O)OCCC(F)(F)F	C7H9F3O2	-5.5789	233.75	0	10.0703	191.045	-437.962	1.72527	0	-0.792361	39.4604	-1.11903	0	2.23849	FALSE	0	0
632	multiple H-substituted, multiple ether-substituted perfluoroalkyl alcohols, n=3, m=17		NA	FC(F)(F)C(F)(F)C(F)(F)C(F)(F)C(F)(F)C(F)(F)CCOCCOCCOCCOCCOCCOCCOCCOCCOCCOCCOCCOCCOCCOCCOCCOCCO[H]	OCCOCCOCCOCCOCCOCCOCCOCCOCCOCCOCCOCCOCCOCCOCCOCCOCCC(F)(F)C(F)(F)C(F)(F)C(F)(F)C(F)(F)C(F)(F)F	C40H69F13O17	-6.325	1932.13	7.47342	12.5919	121.984	2837.3	3.45456	8.5858	0	-22.5538	-2.43391	0	2.17944	FALSE	0	0
633	2,2,3,3,4,4,5,5,6,6,7,7,8,8,9,9,10,10,10-Nonadecafluorodecan-1-amine		CAS_RN: 307-36-8	NCC(F)(F)C(F)(F)C(F)(F)C(F)(F)C(F)(F)C(F)(F)C(F)(F)C(F)(F)C(F)(F)F	NCC(F)(F)C(F)(F)C(F)(F)C(F)(F)C(F)(F)C(F)(F)C(F)(F)C(F)(F)C(F)(F)F	C10H4F19N	1.6429	2341.69	13.1851	12.9043	214.598	980.097	2.80386	0	0	-105.825	-3.0457	0	1.22392	TRUE	1	0
634	2,2,3,3,4,4,5,5,6,6,7,7,8,8,8-Pentadecafluoro-N-(2-hydroxypropyl)octanamide		CAS_RN: 1407514-44-6	CC(O)CNC(=O)C(F)(F)C(F)(F)C(F)(F)C(F)(F)C(F)(F)C(F)(F)C(F)(F)F	CC(O)CNC(=O)C(F)(F)C(F)(F)C(F)(F)C(F)(F)C(F)(F)C(F)(F)C(F)(F)F	C11H8F15NO2	0.3736	1890.94	9.33326	12.6938	207.776	1922.84	2.85164	8.627	-3.55114	-54.8573	-1.38019	0	0.932257	TRUE	1	0
635	2-(heptafluoropropyl)-4,5-dihydro-1h-imidazole		CAS_RN: 4472-70-2	FC(F)(F)C(F)(F)C(F)(F)C1=NCCN1	FC(F)(F)C(F)(F)C(F)(F)C1=NCCN1	C6H5F7N2	-1.3401	594.88	2.3811	11.711	166.784	1159.56	2.1366	0	-1.62053	-7.461	-0.25113	0	1.53452	FALSE	0	0
636	2-[(2,2,3,3,4,4,5,5,6,6,6-Undecafluorohexyl)oxy]ethan-1-ol		CAS_RN: 169289-67-2	OCCOCC(F)(F)C(F)(F)C(F)(F)C(F)(F)C(F)(F)F	OCCOCC(F)(F)C(F)(F)C(F)(F)C(F)(F)C(F)(F)F	C8H7F11O2	-1.6231	1163.06	5.67624	12.1669	178.265	1160.45	2.48313	8.0874	0	-34.8056	-2.59317	0	1.20323	TRUE	1	0
637	Europium, tris[6,6,7,7,8,8,8-heptafluoro-2,2-di(methyl-d3)-3,5-octanedion-1,1,1-d3-ato-?O3,?O5]-|Praseodymium, tris[6,6,7,7,8,8,8-heptafluoro-2,2-di(methyl-d3)-3,5-octanedion-1,1,1-d3-ato-O,O']- (9CI)		CAS_RN: 36393-27-8	[Eu+3].[2H]C([2H])([2H])C(C(=O)\C=C(/[O-])C(F)(F)C(F)(F)C(F)(F)F)(C([2H])([2H])[2H])C([2H])([2H])[2H].[2H]C([2H])([2H])C(C(=O)\C=C(/[O-])C(F)(F)C(F)(F)C(F)(F)F)(C([2H])([2H])[2H])C([2H])([2H])[2H].[2H]C([2H])([2H])C(C(=O)\C=C(/[O-])C(F)(F)C(F)(F)C(F)(F)F)(C([2H])([2H])[2H])C([2H])([2H])[2H]	[2H]C([2H])([2H])C(C(=O)/C=C(\O)C(F)(F)C(F)(F)C(F)(F)F)(C([2H])([2H])[2H])C([2H])([2H])[2H]	C10H11F7O2	-0.486	811.73	2.40685	11.795	175.73	534.57	2.38268	8.7199	-2.62986	39.3053	0	0	1.23272	TRUE	1	0
638	ether-substituted Perfluoroalkyl (linear) sulfonic acids_ii, n=5		NA	S(=O)(O)(=O)C(F)(F)C(F)(F)C(F)(F)C(F)(F)C(F)(F)OC(F)(F)C(F)(F)F	O=S(=O)(O)C(F)(F)C(F)(F)C(F)(F)C(F)(F)C(F)(F)OC(F)(F)C(F)(F)F	C7HF15O4S	-0.261	1626.9	8.07366	12.6227	231.103	122.248	2.74399	7.8307	0	-64.965	0	1	0.580874	TRUE	1	0
639	7,8-Dichloro-1,1,1,2,2,3,3,4,4,5,5,6,6-tridecafluorooctane		CAS_RN: 319490-55-6	FC(F)(F)C(F)(F)C(F)(F)C(F)(F)C(F)(F)C(F)(F)C(Cl)CCl	FC(F)(F)C(F)(F)C(F)(F)C(F)(F)C(F)(F)C(F)(F)C(Cl)CCl	C8H3Cl2F13	-1.0917	1432.18	7.47342	12.4738	227.045	28.0509	2.79205	0	0	-42.5527	-0.736034	0	1.14661	TRUE	1	0
640	4,4,5,5,6,6,7,7,8,8,9,9,10,10,11,11,11-Heptadecafluoro-2-hydroxyundecyl 2-methylprop-2-enoate		CAS_RN: 93706-76-4	CC(=C)C(=O)OCC(O)CC(F)(F)C(F)(F)C(F)(F)C(F)(F)C(F)(F)C(F)(F)C(F)(F)C(F)(F)F	C=C(C)C(=O)OCC(O)CC(F)(F)C(F)(F)C(F)(F)C(F)(F)C(F)(F)C(F)(F)C(F)(F)C(F)(F)F	C15H11F17O3	-0.7654	2245.93	11.2406	12.8461	206.152	1507.92	3.11234	9.0877	-1.4968	-36.2354	-3.11526	0	1.01024	TRUE	1	0
641	1,1'-[1,3-Phenylenebis(oxy)]bis[3-(tridecafluorohexyl)benzene]		CAS_RN: 151707-04-9	FC(F)(F)C(F)(F)C(F)(F)C(F)(F)C(F)(F)C(F)(F)c1cccc(Oc2cccc(Oc3cccc(c3)C(F)(F)C(F)(F)C(F)(F)C(F)(F)C(F)(F)C(F)(F)F)c2)c1	FC(F)(F)C(F)(F)C(F)(F)C(F)(F)C(F)(F)C(F)(F)c1cccc(Oc2cccc(Oc3cccc(C(F)(F)C(F)(F)C(F)(F)C(F)(F)C(F)(F)C(F)(F)F)c3)c2)c1	C30H12F26O2	-0.0647	3132.53	10.3112	13.3783	237.407	2252.34	3.57214	0	0	48.6406	0	0	1.52612	FALSE	0	0
642	Perfluoro-11-methyldodecanoic acid compd. with ethanamine		CAS_RN: 68015-87-2	CC[NH3+].[O-]C(=O)C(F)(F)C(F)(F)C(F)(F)C(F)(F)C(F)(F)C(F)(F)C(F)(F)C(F)(F)C(F)(F)C(F)(C(F)(F)F)C(F)(F)F	O=C(O)C(F)(F)C(F)(F)C(F)(F)C(F)(F)C(F)(F)C(F)(F)C(F)(F)C(F)(F)C(F)(F)C(F)(C(F)(F)F)C(F)(F)F	C13HF25O2	0.8081	3916.75	19.68	13.313	237.236	-19.4699	3.21821	7.6361	-4.68227	-113.674	0	1	0.855567	TRUE	1	0
643	4,4,5,5,6,6,7,7,7-Nonafluoroheptyl carbonochloridate		CAS_RN: 821806-42-2	FC(F)(F)C(F)(F)C(F)(F)C(F)(F)CCCOC(Cl)=O	O=C(Cl)OCCCC(F)(F)C(F)(F)C(F)(F)C(F)(F)F	C8H6ClF9O2	-3.1111	889.54	3.96541	11.8682	176.244	1324.71	2.4748	0	-0.780218	-5.8075	-1.98287	0	1.58152	FALSE	0	0
644	Bis(heneicosafluorodecyl)phosphinic acid		CAS_RN: 52299-27-1	[H]C([H])(C([H])([H])P(O)(=O)C([H])([H])C([H])([H])C(F)(F)C(F)(F)C(F)(F)C(F)(F)C(F)(F)C(F)(F)C(F)(F)C(F)(F)F)C(F)(F)C(F)(F)C(F)(F)C(F)(F)C(F)(F)C(F)(F)C(F)(F)C(F)(F)F	O=P(O)(CCC(F)(F)C(F)(F)C(F)(F)C(F)(F)C(F)(F)C(F)(F)C(F)(F)C(F)(F)F)CCC(F)(F)C(F)(F)C(F)(F)C(F)(F)C(F)(F)C(F)(F)C(F)(F)C(F)(F)F	C20H9F34O2P	0.6384	4126.25	20.3197	13.5125	208.469	936.916	3.51652	9.3345	0	-90.862	-3.92624	1	1.1647	TRUE	1	0
645	12-Azido-1,1,1,2,2,3,3,4,4,5,5,6,6,7,7,8,8,9,9,10,10-henicosafluorododecane		CAS_RN: 145876-00-2	FC(F)(F)C(F)(F)C(F)(F)C(F)(F)C(F)(F)C(F)(F)C(F)(F)C(F)(F)C(F)(F)C(F)(F)CCN=[N+]=[N-]	[N-]=[N+]=NCCC(F)(F)C(F)(F)C(F)(F)C(F)(F)C(F)(F)C(F)(F)C(F)(F)C(F)(F)C(F)(F)C(F)(F)F	C12H4F21N3	-1.0127	2678.63	15.1596	13.0519	221.109	1043.23	3.14589	0	0	-105.58	-2.94074	0	1.25296	TRUE	1	0
646	8:2 Fluorotelomer 9-(trifluoromethyl)-dihydrogen phosphate		CAS_RN: 78974-42-2	C(C(F)(F)C(F)(F)C(F)(F)C(F)(F)C(F)(F)C(F)(F)C(F)(C(F)(F)F)C(F)(F)F)CO[P](O)(O)=O	O=P(O)(O)OCCC(F)(F)C(F)(F)C(F)(F)C(F)(F)C(F)(F)C(F)(F)C(F)(C(F)(F)F)C(F)(F)F	C11H6F19O4P	0.3145	3006.45	13.7028	13.0063	207.149	136.97	3.21821	8.2203	0	-42.6764	-3.16666	2	0.951181	TRUE	1	0
647	multiple ether-substituted Perfluoroalkyl (linear) sulfonic acids, n=3		NA	FC(F)(F)C(F)(F)OC(F)(F)C(F)(F)OC(F)(F)C(F)(F)C(F)(F)S(=O)(O)=O	O=S(=O)(O)C(F)(F)C(F)(F)C(F)(F)OC(F)(F)C(F)(F)OC(F)(F)C(F)(F)F	C7HF15O5S	-1.3425	1376.01	6.88903	12.4917	222.526	138.464	2.81809	7.8619	0	-47.6515	0	1	0.708657	TRUE	1	0
648	(3,3,4,4,5,5,6,6,7,7,8,8,9,9,10,10,10-Heptadecafluorodecyl)phosphinic acid		CAS_RN: 731858-13-2	OP(=O)CCC(F)(F)C(F)(F)C(F)(F)C(F)(F)C(F)(F)C(F)(F)C(F)(F)C(F)(F)F	O=[PH](O)CCC(F)(F)C(F)(F)C(F)(F)C(F)(F)C(F)(F)C(F)(F)C(F)(F)C(F)(F)F	C10H6F17O2P	-0.5088	2056.89	11.2406	12.7922	210.621	952.523	2.89753	8.3009	0	-56.1083	-2.82972	1	0.758917	TRUE	1	0
649	Bis[trimethyl-3-[[(nonafluorobutyl)sulphonyl]amino]propylammonium] sulphate		CAS_RN: 70225-22-8	C[N+](C)(C)CCCNS(=O)(=O)C(F)(F)C(F)(F)C(F)(F)C(F)(F)F.C[N+](C)(C)CCCNS(=O)(=O)C(F)(F)C(F)(F)C(F)(F)C(F)(F)F.[O-]S(=O)(=O)[O-]	C[N+](C)(C)CCCNS(=O)(=O)C(F)(F)C(F)(F)C(F)(F)C(F)(F)F	C10H16F9N2O2S	-4.1787	1176.6	3.96541	12.2281	149.122	1620.42	2.70728	0	0	10.312	-0.780275	0	1.7991	FALSE	0	0
650	n:2 fluorotelomer sulfonyl propano-amido alkyl sulfonic acids, n=4		NA	FC(F)(F)C(F)(F)C(F)(F)C(F)(F)C(F)(F)C(F)(F)C(F)(F)C(F)(F)CCS(CCC(NC(C)(C)CS(O)(=O)=O)=O)(=O)=O	CC(C)(CS(=O)(=O)O)NC(=O)CCS(=O)(=O)CCC(F)(F)C(F)(F)C(F)(F)C(F)(F)C(F)(F)C(F)(F)C(F)(F)C(F)(F)F	C17H18F17NO6S2	0.8629	2381.14	10.3345	12.9668	180.316	246.721	3.5095	8.8875	-1.35657	-10.1456	-3.14594	1	0.913674	TRUE	1	0
651	Diammonium 3,3,4,4,5,5,6,6,7,7,8,8,9,9,10,10,11,12,12,12-icosafluoro-11-(trifluoromethyl)dodecyl phosphate		CAS_RN: 93857-50-2	[NH4+].[NH4+].[O-]P(=O)([O-])OCCC(F)(F)C(F)(F)C(F)(F)C(F)(F)C(F)(F)C(F)(F)C(F)(F)C(F)(F)C(F)(C(F)(F)F)C(F)(F)F	O=P(O)(O)OCCC(F)(F)C(F)(F)C(F)(F)C(F)(F)C(F)(F)C(F)(F)C(F)(F)C(F)(F)C(F)(C(F)(F)F)C(F)(F)F	C13H6F23O4P	0.3332	3601.58	17.6682	13.2265	213.865	208.605	3.21821	8.2318	0	-69.5476	-3.30791	2	1.00808	TRUE	1	0
652	perfluoroalkanesulfonamido quaternary ammonium alcohol, n=3		NA	S(NCCC[N+](CCO)(C)C)(=O)(=O)C(F)(F)C(F)(F)C(F)(F)F	C[N+](C)(CCO)CCCNS(=O)(=O)C(F)(F)C(F)(F)C(F)(F)F	C10H18F7N2O3S	-3.3473	923.29	2.3811	11.9705	120.641	1621.88	2.9102	8.7513	0	19.6833	-0.685179	0	1.78644	FALSE	0	0
653	Trimethyl-3-[[(pentadecafluoroheptyl)sulphonyl]amino]propylammonium chloride		CAS_RN: 68555-81-7	[Cl-].C[N+](C)(C)CCCNS(=O)(=O)C(F)(F)C(F)(F)C(F)(F)C(F)(F)C(F)(F)C(F)(F)C(F)(F)F	C[N+](C)(C)CCCNS(=O)(=O)C(F)(F)C(F)(F)C(F)(F)C(F)(F)C(F)(F)C(F)(F)C(F)(F)F	C13H16F15N2O2S	-3.037	2069.29	9.33326	12.8172	173.29	2370.99	3.10147	0	0	-28.0182	-1.12087	0	1.59943	FALSE	0	0
654	2-(Perfluorohexyl)ethylphosphonic acid		CAS_RN: 252237-40-4	OP(O)(=O)CCC(F)(F)C(F)(F)C(F)(F)C(F)(F)C(F)(F)C(F)(F)F	O=P(O)(O)CCC(F)(F)C(F)(F)C(F)(F)C(F)(F)C(F)(F)C(F)(F)F	C8H6F13O3P	2.2065	1481	7.47342	12.468	199.176	178.057	2.60289	8.2972	0	-28.9165	-2.85432	2	1.01193	TRUE	1	0
655	2,3,3,3-Tetrafluoro-2-(trifluoromethyl)propanamide		CAS_RN: 662-20-4	NC(=O)C(F)(C(F)(F)F)C(F)(F)F	NC(=O)C(F)(C(F)(F)F)C(F)(F)F	C4H2F7NO	3.6491	1125	2.3811	11.5261	74.1835	22.919	1.58175	0	-3.13194	11.1735	0	0	2.30704	FALSE	0	0
656	1,1,1,2,2,3,3,4,4-Nonafluoro-5-[(prop-2-en-1-yl)oxy]pentane		CAS_RN: 646063-05-0	FC(F)(F)C(F)(F)C(F)(F)C(F)(F)COCC=C	C=CCOCC(F)(F)C(F)(F)C(F)(F)C(F)(F)F	C8H7F9O	-3.7988	866.63	3.96541	11.8384	174.528	913.682	2.41	0	0	-15.6563	-2.29396	0	1.66234	FALSE	0	0
657	1-Octanesulfinic acid, 1,1,2,2,3,3,4,4,5,5,6,6,7,7,8,8,8-heptadecafluoro-, sodium salt		CAS_RN: 68555-67-9	[Na+].[O-]S(=O)C(F)(F)C(F)(F)C(F)(F)C(F)(F)C(F)(F)C(F)(F)C(F)(F)C(F)(F)F	O=S(O)C(F)(F)C(F)(F)C(F)(F)C(F)(F)C(F)(F)C(F)(F)C(F)(F)C(F)(F)F	C8HF17O2S	0.9495	2129.2	11.2406	12.8044	233.794	82.494	2.76612	7.9005	0	-100.501	0	1	0.506453	TRUE	1	0
658	Perfluoroperhydrobenzyl tetralin		CAS_RN: 116265-66-8	FC(F)(C1(F)C(F)(F)C(F)(F)C(F)(F)C(F)(F)C1(F)F)C1(F)C(F)(F)C(F)(F)C2(F)C(F)(F)C(F)(F)C(F)(F)C(F)(F)C2(F)C1(F)F	FC1(F)C(F)(F)C(F)(F)C(F)(C(F)(F)C2(F)C(F)(F)C(F)(F)C3(F)C(F)(F)C(F)(F)C(F)(F)C(F)(F)C3(F)C2(F)F)C(F)(F)C1(F)F	C17F30	0.8798	5562.56	41.1041	14.1565	243.044	-173.348	3.3605	0	0	-109.734	0	0	1.81264	FALSE	0	0
659	5-(Henicosafluorodecyl)-1H-imidazole		CAS_RN: 81769-57-5	FC(F)(F)C(F)(F)C(F)(F)C(F)(F)C(F)(F)C(F)(F)C(F)(F)C(F)(F)C(F)(F)C(F)(F)c1Ncnc1	FC(F)(F)C(F)(F)C(F)(F)C(F)(F)C(F)(F)C(F)(F)C(F)(F)C(F)(F)C(F)(F)C(F)(F)c1cnc[nH]1	C13H3F21N2	-0.1245	2705.75	15.1596	13.1276	231.543	723.717	3.07504	0	0	-100.235	0	0	1.10048	TRUE	1	0
660	1H,2H,2H-perfluorooctanal (2,4-dinitrophenyl)hydrazone		CAS_RN: 128917-19-1	[O-][N+](=O)C1=CC(=C(NN=CCC(F)(F)C(F)(F)C(F)(F)C(F)(F)C(F)(F)C(F)(F)F)C=C1)[N+]([O-])=O	O=[N+]([O-])c1ccc(NN=CCC(F)(F)C(F)(F)C(F)(F)C(F)(F)C(F)(F)C(F)(F)F)c([N+](=O)[O-])c1	C14H7F13N4O4	0.3515	1709.96	7.47342	12.6496	200.864	849.095	3.20208	0	0	-20.6837	-2.78072	0	1.25807	TRUE	1	0
661	10:2 Fluorotelomer aldehyde		CAS_RN: 864551-38-2	C(C=O)C(C(C(C(C(C(C(C(C(C(F)(F)F)(F)F)(F)F)(F)F)(F)F)(F)F)(F)F)(F)F)(F)F)(F)F	O=CCC(F)(F)C(F)(F)C(F)(F)C(F)(F)C(F)(F)C(F)(F)C(F)(F)C(F)(F)C(F)(F)C(F)(F)F	C12H3F21O	-0.8414	2708.25	15.1596	13.043	226.928	489.911	3.02034	0	0	-106.61	-3.23644	0	1.2494	TRUE	1	0
662	Potassium 3,3,4,4,5,5,6,6,7,7,8,8,8-tridecafluorooctanesulphonate		CAS_RN: 59587-38-1	[K+].[O-]S(=O)(=O)CCC(F)(F)C(F)(F)C(F)(F)C(F)(F)C(F)(F)C(F)(F)F	O=S(=O)(O)CCC(F)(F)C(F)(F)C(F)(F)C(F)(F)C(F)(F)C(F)(F)F	C8H5F13O3S	0.6084	1479.97	7.47342	12.468	206.555	188.461	2.60572	8.183	0	-29.9879	-2.91819	1	0.81393	TRUE	1	0
663	Ethyl perfluorobutyl ether		CAS_RN: 163702-05-4	C(OC(F)(F)C(F)(F)C(F)(F)C(F)(F)F)C	CCOC(F)(F)C(F)(F)C(F)(F)C(F)(F)F	C6H5F9O	-4.4737	849	3.96541	11.8081	163.577	1277.75	1.93183	0	0	-18.4684	-1.15622	0	1.79964	FALSE	0	0
664	1H,1H,3H-Perfluorobutyl 2-methylacrylate		CAS_RN: 36405-47-7	CC(=C)C(=O)OCC(F)(F)C(F)C(F)(F)F	C=C(C)C(=O)OCC(F)(F)C(F)C(F)(F)F	C8H8F6O2	-4.1878	599.43	0.5	11.1123	185.841	-345.132	2.22606	0	-1.31107	13.4217	-1.98674	0	1.80147	FALSE	0	0
665	H-substituted perfluoroalkyl (linear) sulfonic acids_ii, n=0		NA	FC(F)(F)C(S(=O)(O)=O)(F)[H]	O=S(=O)(O)C(F)C(F)(F)F	C2H2F4O3S	1.6272	490.25	0	10.638	74.1835	63.0958	1.58175	7.6472	0	2.9808	0	1	2.22838	FALSE	0	0
666	(3,3,4,4,5,5,5-Heptafluoropent-1-yn-1-yl)benzene		CAS_RN: 81674-08-0	FC(F)(F)C(F)(F)C(F)(F)C#Cc1ccccc1	FC(F)(F)C(F)(F)C(F)(F)C#Cc1ccccc1	C11H5F7	0	559.54	2.3811	11.5772	256.427	971.047	2.52329	0	0	41.588	0	0	1.53809	FALSE	0	0
667	9,9,10,10,11,11,12,12,12-Nonafluorododecan-1-ol		CAS_RN: 133001-14-6	OCCCCCCCCC(F)(F)C(F)(F)C(F)(F)C(F)(F)F	OCCCCCCCCC(F)(F)C(F)(F)C(F)(F)C(F)(F)F	C12H17F9O	-0.8185	928.5	3.96541	11.8694	135.721	2673.53	2.74401	8.4617	0	18.9306	-1.75826	0	1.72337	FALSE	0	0
668	N-[4-(Heptafluoropropyl)phenyl]acetamide		CAS_RN: 199530-73-9	CC(=O)Nc1ccc(cc1)C(F)(F)C(F)(F)C(F)(F)F	CC(=O)Nc1ccc(C(F)(F)C(F)(F)C(F)(F)F)cc1	C11H8F7NO	0.3591	680.25	2.3811	11.8686	187.127	485.562	2.61918	0	-0.550804	30.9107	0	0	1.40009	FALSE	0	0
669	perfluoroalkanesulfonamido quaternary ammonium dicarboxylate A, n=4		NA	S(N(CC(O)=O)CCC[N+](CC(O)=O)(C)C)(=O)(=O)C(F)(F)C(F)(F)C(F)(F)C(F)(F)F	C[N+](C)(CCCN(CC(=O)O)S(=O)(=O)C(F)(F)C(F)(F)C(F)(F)C(F)(F)F)CC(=O)O	C13H17F9N2O6S	-2.925	1352.65	3.96541	12.4601	157.177	735.285	3.23056	8.7062	-2.16708	15.2516	-1.89452	2	1.32961	TRUE	1	0
670	multiple H-substituted-ether-substituted-perfluoroalkyl (linear) carboxylic acids, n=6		NA	FC(F)(F)C(F)(F)C(F)(F)C(F)(F)C(F)(F)C(F)(F)COCC(O)=O	O=C(O)COCC(F)(F)C(F)(F)C(F)(F)C(F)(F)C(F)(F)C(F)(F)F	C9H5F13O3	-0.8315	1468.67	7.47342	12.4305	201.363	243.491	2.64368	7.9487	-2.0974	-51.9283	-2.99052	1	0.767066	TRUE	1	0
671	2,3,3,4,4,5,5,6,6,7,7,7-Dodecafluoro-2-(trifluoromethyl)heptanoic acid		CAS_RN: 207678-51-1	OC(=O)C(F)(C(F)(F)F)C(F)(F)C(F)(F)C(F)(F)C(F)(F)C(F)(F)F	O=C(O)C(F)(C(F)(F)F)C(F)(F)C(F)(F)C(F)(F)C(F)(F)C(F)(F)F	C8HF15O2	1.2039	2158.19	9.33326	12.68	217.475	37.6374	2.63077	7.7325	-4.58722	-47.306	0	1	0.675729	TRUE	1	0
672	4-(1,1,1,2,3,3,3-Heptafluoropropan-2-yl)-2-methyl-3-(propane-2-sulfonyl)benzoic acid		CAS_RN: 1355554-50-5	CC(C)S(=O)(=O)c1c(C)c(ccc1C(F)(C(F)(F)F)C(F)(F)F)C(O)=O	Cc1c(C(=O)O)ccc(C(F)(C(F)(F)F)C(F)(F)F)c1S(=O)(=O)C(C)C	C14H13F7O4S	2.0911	1158.55	2.3811	12.5131	206.773	-161.331	3.00454	8.9913	-1.77006	111.363	0	1	1.13022	TRUE	1	0
673	1,1,1,2,2,3,3,4,4-Nonafluorooctane		CAS_RN: 253342-14-2	CCCCC(F)(F)C(F)(F)C(F)(F)C(F)(F)F	CCCCC(F)(F)C(F)(F)C(F)(F)C(F)(F)F	C8H9F9	-2.3788	860.13	3.96541	11.8265	153.48	1941.47	2.36565	0	0	0.9054	-1.73396	0	1.74472	FALSE	0	0
674	(Perfluoropropyl)(perfluorophenyl)methanol		CAS_RN: 19108-36-2	OC(C1=C(F)C(F)=C(F)C(F)=C1F)C(F)(F)C(F)(F)C(F)(F)F	OC(c1c(F)c(F)c(F)c(F)c1F)C(F)(F)C(F)(F)C(F)(F)F	C10H2F12O	2.366	1149.31	2.3811	12.2698	216.719	334.882	2.59755	8.7829	0	-25.435	0	0	0.97845	TRUE	1	0
675	12:2 Fluorotelomer carboxylic acid		CAS_RN: 70887-93-3	OC(CC(F)(F)C(F)(F)C(F)(F)C(F)(F)C(F)(F)C(F)(F)C(F)(F)C(F)(F)C(F)(F)C(F)(F)C(F)(C(F)(F)F)F)=O	O=C(O)CC(F)(F)C(F)(F)C(F)(F)C(F)(F)C(F)(F)C(F)(F)C(F)(F)C(F)(F)C(F)(F)C(F)(F)C(F)(F)C(F)(F)F	C14H3F25O2	0.624	3387.13	19.1782	13.2702	230.794	64.0634	3.21832	7.8633	-3.37882	-131.811	-3.78116	1	0.972147	TRUE	1	0
676	(1H,1H-Perfluoro-12-methyltridecyl)oxirane		CAS_RN: 54009-78-8	C(C(C(C(C(C(C(C(C(C(C(C(C(F)(F)F)(C(F)(F)F)F)(F)F)(F)F)(F)F)(F)F)(F)F)(F)F)(F)F)(F)F)(F)F)(F)F)C1OC1	FC(F)(F)C(F)(C(F)(F)F)C(F)(F)C(F)(F)C(F)(F)C(F)(F)C(F)(F)C(F)(F)C(F)(F)C(F)(F)C(F)(F)C(F)(F)CC1CO1	C16H5F27O	-0.6778	4137.44	21.7082	13.422	227.007	993.187	3.28526	0	0	-92.2582	-2.86849	0	1.36137	FALSE	0	0
677	1,1,1,2,2,3,3,4,4,5,5,6,6,7,7,8,8,9,9,10,10,19,19,20,20,21,21,22,22,23,23,24,24,25,25,26,26,27,27,28,28,28-Dotetracontafluorooctacosane		CAS_RN: 115249-34-8	FC(F)(F)C(F)(F)C(F)(F)C(F)(F)C(F)(F)C(F)(F)C(F)(F)C(F)(F)C(F)(F)C(F)(F)CCCCCCCCC(F)(F)C(F)(F)C(F)(F)C(F)(F)C(F)(F)C(F)(F)C(F)(F)C(F)(F)C(F)(F)C(F)(F)F	FC(F)(F)C(F)(F)C(F)(F)C(F)(F)C(F)(F)C(F)(F)C(F)(F)C(F)(F)C(F)(F)C(F)(F)CCCCCCCCC(F)(F)C(F)(F)C(F)(F)C(F)(F)C(F)(F)C(F)(F)C(F)(F)C(F)(F)C(F)(F)C(F)(F)F	C28H16F42	-0.4735	5315.75	0	13.748	197.821	6148.18	3.6546	0	0	-112.703	-3.20311	0	2.76828	FALSE	0	0
678	double bond-perfluoroalkyl (linear) carboxylic acids_5_n, n=5		NA	F/C(C(F)(C(F)(F)C(F)(F)C(F)(F)C(F)(F)C(O)=O)F)=C(C(F)(F)C(F)(F)C(F)(F)C(F)(F)C(F)(F)F)/F	O=C(O)C(F)(F)C(F)(F)C(F)(F)C(F)(F)C(F)(F)/C(F)=C(\F)C(F)(F)C(F)(F)C(F)(F)C(F)(F)C(F)(F)F	C13HF23O2	0.8976	2817.5	12.1731	13.0705	241.533	98.7481	3.11124	7.6675	-5.97924	-139.976	0	1	0.963081	TRUE	1	0
679	Cl-substituted perfluoroalkyl (linear) carboyxlic acids_i, n=11		CAS_RN: 574715-87-0	OC(C(F)(F)C(F)(F)C(F)(F)C(F)(F)C(F)(F)C(F)(F)C(F)(F)C(F)(F)C(F)(F)C(F)(F)C(F)(F)Cl)=O	O=C(O)C(F)(F)C(F)(F)C(F)(F)C(F)(F)C(F)(F)C(F)(F)C(F)(F)C(F)(F)C(F)(F)C(F)(F)C(F)(F)Cl	C12HClF22O2	0.9684	2928.4	17.1586	13.1774	241.429	86.2605	3.12608	7.6607	-4.57735	-154.781	0	1	0.785332	TRUE	1	0
680	4'-Hydroxy[1,1'-biphenyl]-4-yl 2-[perfluoro-4-morpholinylmethyl]-perfluoropropanoate		CAS_RN: 304658-31-9	OC1=CC=C(C=C1)C1=CC=C(OC(=O)C(F)(C(F)(F)F)C(F)(F)N2C(F)(F)C(F)(F)OC(F)(F)C2(F)F)C=C1	O=C(Oc1ccc(-c2ccc(O)cc2)cc1)C(F)(C(F)(F)F)C(F)(F)N1C(F)(F)C(F)(F)OC(F)(F)C1(F)F	C20H9F14NO4	-0.0645	2313.35	8.56995	13.0711	227.95	1145.88	3.20472	9.2374	-3.95638	129.708	0	0	1.2998	TRUE	1	0
681	Bis(4-tert-butylphenyl)iodanium nonafluorobutane-1-sulfonate		CAS_RN: 194999-85-4	[O-]S(=O)(=O)C(F)(F)C(F)(F)C(F)(F)C(F)(F)F.CC(C)(C)C1=CC=C([I+]C2=CC=C(C=C2)C(C)(C)C)C=C1	CC(C)(C)c1ccc([I+]c2ccc(C(C)(C)C)cc2)cc1	C20H26I	3.3496	266.92	0.1	11.5435	137.645	-3185.4	2.61918	0	0	32.0986	0	0	2.2735	FALSE	0	0
682	6,6,7,7,8,8,9,9,9-Nonafluoro-3-methylnon-4-yn-3-ol		CAS_RN: 82721-69-5	CCC(C)(O)C#CC(F)(F)C(F)(F)C(F)(F)C(F)(F)F	CCC(C)(O)C#CC(F)(F)C(F)(F)C(F)(F)C(F)(F)F	C10H9F9O	-0.1551	880.19	4.32964	11.9624	180.256	1215.21	2.49864	9.1534	0	12.6124	-0.335997	0	1.18388	TRUE	1	0
683	n:2 fluorotelomer sulfonyl propanoic acids, n=3		NA	FC(F)(F)C(F)(F)C(F)(F)C(F)(F)C(F)(F)C(F)(F)CCS(CCC(O)=O)(=O)=O	O=C(O)CCS(=O)(=O)CCC(F)(F)C(F)(F)C(F)(F)C(F)(F)C(F)(F)C(F)(F)F	C11H9F13O4S	1.003	1564.64	7.47342	12.5204	192.058	224.959	2.91042	8.218	-1.77665	-3.3173	-2.84565	1	0.793468	TRUE	1	0
684	4-{[(Perfluorooctyl)sulfonyl](methyl)amino}butyl 2-methyl-2-propenoate		CAS_RN: 61577-14-8	C(N([S](=O)(=O)C(F)(F)C(F)(F)C(F)(F)C(F)(F)C(F)(F)C(F)(F)C(F)(F)C(F)(F)F)C)CCCOC(=O)C(=C)C	C=C(C)C(=O)OCCCCN(C)S(=O)(=O)C(F)(F)C(F)(F)C(F)(F)C(F)(F)C(F)(F)C(F)(F)C(F)(F)C(F)(F)F	C17H16F17NO4S	-2.5845	2475.39	11.2406	13.0053	192.492	2213.36	3.34914	0	-0.999364	-29.4432	-1.30258	0	1.44301	FALSE	0	0
685	Methyl nonaflate		CAS_RN: 6401-03-2	COS(=O)(=O)C(F)(F)C(F)(F)C(F)(F)C(F)(F)F	COS(=O)(=O)C(F)(F)C(F)(F)C(F)(F)C(F)(F)F	C5H3F9O3S	-3.4591	1077.72	3.96541	12.1183	196.015	-479.303	2.39935	0	0	-31.6539	0	0	1.49764	FALSE	0	0
686	N-Dodecyl-2,2,3,3,4,4,5,5,6,6,7,7,8,8,8-pentadecafluorooctanamide		CAS_RN: 37696-86-9	CCCCCCCCCCCCNC(=O)C(F)(F)C(F)(F)C(F)(F)C(F)(F)C(F)(F)C(F)(F)C(F)(F)F	CCCCCCCCCCCCNC(=O)C(F)(F)C(F)(F)C(F)(F)C(F)(F)C(F)(F)C(F)(F)C(F)(F)F	C20H26F15NO	-1.1527	1982.65	9.33326	12.7113	154.023	5600.95	3.24522	0	-3.35204	-2.0508	-0.86977	0	2.47578	FALSE	0	0
687	N-ethyl perfluoroheptanesulfonamido polyethylene glycol, n=7, m=8		NA	OCCOCCOCCOCCOCCOCCOCCOCCOCCN(CC)S(=O)(=O)C(F)(F)C(F)(F)C(F)(F)C(F)(F)C(F)(F)C(F)(F)C(F)(F)F	CCN(CCOCCOCCOCCOCCOCCOCCOCCOCCO)S(=O)(=O)C(F)(F)C(F)(F)C(F)(F)C(F)(F)C(F)(F)C(F)(F)C(F)(F)F	C27H42F15NO11S	-4.8997	2296.91	9.33326	12.9218	140.739	4144.41	3.41757	8.5446	0	-32.9705	-1.31272	0	2.16843	FALSE	0	0
688	Sodium undecafluoropentane-1-sulfinate		CAS_RN: 1997344-07-6	[Na+].[O-]S(=O)C(F)(F)C(F)(F)C(F)(F)C(F)(F)C(F)(F)F	O=S(O)C(F)(F)C(F)(F)C(F)(F)C(F)(F)C(F)(F)F	C5HF11O2S	1.3588	1236.52	5.67624	12.2042	220.144	82.0566	2.36975	7.8279	0	-59.1282	0	1	0.71829	TRUE	1	0
689	(3,3,4,4,5,5,6,6,7,7,8,8,9,9,10,10,11,11,12,12,13,13,14,14,14-Pentacosafluorotetradecyl)phosphonic acid		CAS_RN: 147290-12-8	OP(O)(=O)CCC(F)(F)C(F)(F)C(F)(F)C(F)(F)C(F)(F)C(F)(F)C(F)(F)C(F)(F)C(F)(F)C(F)(F)C(F)(F)C(F)(F)F	O=P(O)(O)CCC(F)(F)C(F)(F)C(F)(F)C(F)(F)C(F)(F)C(F)(F)C(F)(F)C(F)(F)C(F)(F)C(F)(F)C(F)(F)C(F)(F)F	C14H6F25O3P	1.5263	3266.38	19.1782	13.2857	222.04	461.7	3.3208	8.352	0	-105.819	-3.40261	2	1.04614	TRUE	1	0
690	n:2 fluorotelomer thio alkyl amido sulfonic acids, n=3		CAS_RN: 62880-95-9	FC(F)(F)C(F)(F)C(F)(F)C(F)(F)C(F)(F)C(F)(F)CCSCCC(NC(C)(C)CS(O)(=O)=O)=O	CC(C)(CS(=O)(=O)O)NC(=O)CCSCCC(F)(F)C(F)(F)C(F)(F)C(F)(F)C(F)(F)C(F)(F)F	C15H18F13NO4S2	0.7498	1697.85	6.54649	12.5965	167.15	225.233	3.28177	8.8956	-0.84315	5.0158	-2.24751	1	0.932987	TRUE	1	0
691	1-(1,1,1,2,3,3,3-Heptafluoropropan-2-yl)-3,5-dinitrobenzene		CAS_RN: 24813-57-8	[O-][N+](=O)C1=CC(=CC(=C1)[N+]([O-])=O)C(F)(C(F)(F)F)C(F)(F)F	O=[N+]([O-])c1cc([N+](=O)[O-])cc(C(F)(C(F)(F)F)C(F)(F)F)c1	C9H3F7N2O4	0.5535	1000.83	2.3811	12.1375	221.343	174.248	2.53919	0	0	68.8906	0	0	1.40419	FALSE	0	0
692	Cadmium bis(1,1,2,2,3,3,4,4,4-nonafluorobutan-1-ide)		CAS_RN: 93367-04-5	[Cd++].F[C-](F)C(F)(F)C(F)(F)C(F)(F)F.F[C-](F)C(F)(F)C(F)(F)C(F)(F)F	FC(F)C(F)(F)C(F)(F)C(F)(F)F	C4HF9	-2.5412	709.25	2.3811	11.4497	142.757	13.0133	1.58175	0	0	-50.1426	0	0	1.81632	FALSE	0	0
693	1-(3,3,4,4,5,5,6,6,7,7,8,8,9,9,10,10,10-Heptadecafluorodecyl)-N,N,1,1-tetramethylsilanamine		CAS_RN: 1221157-06-7	CN(C)[Si](C)(C)CCC(F)(F)C(F)(F)C(F)(F)C(F)(F)C(F)(F)C(F)(F)C(F)(F)C(F)(F)F	CN(C)[Si](C)(C)CCC(F)(F)C(F)(F)C(F)(F)C(F)(F)C(F)(F)C(F)(F)C(F)(F)C(F)(F)F	C14H16F17NSi	3.7017	2135.66	11.2406	12.8586	145.815	306.065	2.97608	0	0	3.6002	-2.32739	0	1.56414	FALSE	0	0
694	multiple H-substituted, multiple ether-substituted perfluoroalkyl alcohols, n=7, m=18		NA	FC(F)(F)C(F)(F)C(F)(F)C(F)(F)C(F)(F)C(F)(F)C(F)(F)C(F)(F)C(F)(F)C(F)(F)C(F)(F)C(F)(F)C(F)(F)C(F)(F)CCOCCOCCOCCOCCOCCOCCOCCOCCOCCOCCOCCOCCOCCOCCOCCOCCOCCO[H]	OCCOCCOCCOCCOCCOCCOCCOCCOCCOCCOCCOCCOCCOCCOCCOCCOCCOCCC(F)(F)C(F)(F)C(F)(F)C(F)(F)C(F)(F)C(F)(F)C(F)(F)C(F)(F)C(F)(F)C(F)(F)C(F)(F)C(F)(F)C(F)(F)C(F)(F)F	C50H73F29O18	-5.079	4341.38	23.2671	13.5086	141.804	7081.37	3.49512	8.5915	0	-96.0831	-3.08117	0	3.19131	FALSE	0	0
695	1-[4-((Perfluorooctyl)ethyl)phenylmethoxycarbonyloxy]pyrrolidine-2,5-dione		CAS_RN: 556050-49-8	FC(F)(F)C(F)(F)C(F)(F)C(F)(F)C(F)(F)C(F)(F)C(F)(F)C(F)(F)CCC1=CC=C(COC(=O)ON2C(=O)CCC2=O)C=C1	O=C(OCc1ccc(CCC(F)(F)C(F)(F)C(F)(F)C(F)(F)C(F)(F)C(F)(F)C(F)(F)C(F)(F)F)cc1)ON1C(=O)CCC1=O	C22H14F17NO5	-1.1203	2320.25	11.2406	12.9944	203.673	2168.14	3.3702	0	-1.57616	9.5239	-2.63253	0	1.43151	FALSE	0	0
696	Perfluoroalkylamido betaine-related_i, n=8		NA	C(NCCC[N+](CC(OC(C)C)=O)(C)C)(=O)C(F)(F)C(F)(F)C(F)(F)C(F)(F)C(F)(F)C(F)(F)C(F)(F)C(F)(F)F	CC(C)OC(=O)C[N+](C)(C)CCCNC(=O)C(F)(F)C(F)(F)C(F)(F)C(F)(F)C(F)(F)C(F)(F)C(F)(F)C(F)(F)F	C19H21F17N2O3	-3.5282	2377.96	11.2406	12.9302	167.382	2919.36	3.30888	0	-3.57111	-28.7926	-1.15336	0	1.77419	FALSE	0	0
697	2,2,3,3,4,4,4-heptafluoro-n'-(2,2,3,3,4,4,4-heptafluorobutanoyl)butanehydrazide		CAS_RN: 648-19-1	FC(F)(F)C(F)(F)C(F)(F)C(=O)NNC(=O)C(F)(F)C(F)(F)C(F)(F)F	O=C(NNC(=O)C(F)(F)C(F)(F)C(F)(F)F)C(F)(F)C(F)(F)C(F)(F)F	C8H2F14N2O2	1.2947	1340.5	4.29096	12.2739	203.301	512.856	2.74274	0	-3.83398	-58.8514	0	0	1.18448	TRUE	1	0
698	Perfluoro-N,N-bis(perfluoroethyl)propylamine		CAS_RN: 338-81-8	FC(F)(F)C(F)(F)N(C(F)(F)C(F)(F)F)C(F)(F)C(F)(F)C(F)(F)F	FC(F)(F)C(F)(F)N(C(F)(F)C(F)(F)F)C(F)(F)C(F)(F)C(F)(F)F	C7F17N	-3.2389	1487.81	8.2917	12.5846	227.199	30.0287	2.65965	0	0	-30.3918	0	0	1.33933	TRUE	1	0
699	H-substituted perfluoroalkyl (linear) sulfonic acids_ii, n=1		CAS_RN: 357-31-3	FC(F)(F)C([H])(F)C(F)(F)S(=O)(O)=O	O=S(=O)(O)C(F)(F)C(F)C(F)(F)F	C3H2F6O3S	1.3871	614.11	0.5	11.3071	165.132	-452.211	1.58175	7.7095	0	-15.733	0	1	1.41028	FALSE	0	0
700	1,1,2,3,3,3-Hexafluoro-2-(trifluoromethyl)propane-1-sulphonic anhydride		CAS_RN: 93894-52-1	FC(F)(F)C(F)(C(F)(F)F)C(F)(F)S(=O)(=O)OS(=O)(=O)C(F)(F)C(F)(C(F)(F)F)C(F)(F)F	O=S(=O)(OS(=O)(=O)C(F)(F)C(F)(C(F)(F)F)C(F)(F)F)C(F)(F)C(F)(C(F)(F)F)C(F)(F)F	C8F18O5S2	-2.4152	3330.35	8.36616	12.9977	240.441	-728.978	3.21821	0	0	14.1668	0	0	1.3958	FALSE	0	0
701	3-[(Butan-2-yl)sulfanyl]-4-(1,1,1,2,3,3,3-heptafluoropropan-2-yl)-2-methylbenzoic acid		CAS_RN: 1355554-14-1	CCC(C)Sc1c(C)c(ccc1C(F)(C(F)(F)F)C(F)(F)F)C(O)=O	CCC(C)Sc1c(C(F)(C(F)(F)F)C(F)(F)F)ccc(C(=O)O)c1C	C15H15F7O2S	1.8433	997.55	2.3811	12.3087	197.459	631.865	2.95007	9.0803	-1.48173	112.475	0.504869	1	1.20109	TRUE	1	0
702	(Z)-1,2,3,3,3-pentafluoropropene		CAS_RN: 5528-43-8	FC=C(F)C(F)(F)F	FC=C(F)C(F)(F)F	C3HF5	-4.0728	216	0	9.8266	0	6.09077	1.00635	0	-2.71065	-21.1637	0	0	3.36311	FALSE	0	0
703	1,1,1,2,2,3,3,4,4,5,5,6,6,7,7,8,8,9,9,10,10-Henicosafluoro-12-iodooctacosane		CAS_RN: 1257261-90-7	CCCCCCCCCCCCCCCCC(I)CC(F)(F)C(F)(F)C(F)(F)C(F)(F)C(F)(F)C(F)(F)C(F)(F)C(F)(F)C(F)(F)C(F)(F)F	CCCCCCCCCCCCCCCCC(I)CC(F)(F)C(F)(F)C(F)(F)C(F)(F)C(F)(F)C(F)(F)C(F)(F)C(F)(F)C(F)(F)C(F)(F)F	C28H36F21I	-0.7376	2814.18	15.1596	13.1032	162.177	3870.42	3.47785	0	0	6.7704	-2.40741	0	1.98801	FALSE	0	0
704	Trichloro[5,5,6,6,7,7,8,8,9,9,10,10,10-tridecafluoro-2-(tridecafluorohexyl)decyl]silane		CAS_RN: 1621953-16-9	FC(F)(F)C(F)(F)C(F)(F)C(F)(F)C(F)(F)C(F)(F)CCC(C[Si](Cl)(Cl)Cl)C(F)(F)C(F)(F)C(F)(F)C(F)(F)C(F)(F)C(F)(F)F	FC(F)(F)C(F)(F)C(F)(F)C(F)(F)C(F)(F)C(F)(F)CCC(C[Si](Cl)(Cl)Cl)C(F)(F)C(F)(F)C(F)(F)C(F)(F)C(F)(F)C(F)(F)F	C16H7Cl3F26Si	6.8236	2941.41	14.822	13.2176	224.532	176.999	3.38588	0	0	-29.0784	-3.66107	0	1.77398	FALSE	0	0
705	n:2 fluorotelomer thio alkyl amido betaine-related, n=6		NA	FC(F)(F)C(F)(F)C(F)(F)C(F)(F)C(F)(F)C(F)(F)C(F)(F)C(F)(F)C(F)(F)C(F)(F)C(F)(F)C(F)(F)CCSCC(NCCC[N+](C)(C)CC(O)=O)=O	C[N+](C)(CCCNC(=O)CSCCC(F)(F)C(F)(F)C(F)(F)C(F)(F)C(F)(F)C(F)(F)C(F)(F)C(F)(F)C(F)(F)C(F)(F)C(F)(F)C(F)(F)F)CC(=O)O	C23H21F25N2O3S	-1.0219	3454.93	19.1782	13.3228	179.106	2924.84	3.53469	8.7533	-1.21284	-56.5367	-2.78955	1	1.39415	FALSE	0	0
706	Prop-2-en-1-yl pentadecafluorooctanoate		CAS_RN: 20120-44-9	FC(F)(F)C(F)(F)C(F)(F)C(F)(F)C(F)(F)C(F)(F)C(F)(F)C(=O)OCC=C	C=CCOC(=O)C(F)(F)C(F)(F)C(F)(F)C(F)(F)C(F)(F)C(F)(F)C(F)(F)F	C11H5F15O2	-2.1895	1869.1	9.33326	12.6814	226.236	1310.86	2.83251	0	-3.70947	-61.3635	-1.40796	0	1.23958	TRUE	1	0
707	perfluoroalkanesulfonamido sulfonate betaine A, n=5		NA	S(NCCC[N+](CCCS(=O)(O)=O)(C)C)(=O)(=O)C(F)(F)C(F)(F)C(F)(F)C(F)(F)C(F)(F)F	C[N+](C)(CCCNS(=O)(=O)C(F)(F)C(F)(F)C(F)(F)C(F)(F)C(F)(F)F)CCCS(=O)(=O)O	C13H19F11N2O5S2	-1.7177	1578.05	5.67624	12.5467	148.082	1770.28	3.1493	8.7588	0	7.3913	-1.06853	1	1.30236	TRUE	1	0
708	1,1,1,2,2,3,3,4,4,5,5,6,6,7,7,8,8-Heptadecafluoro-10-iodooctacosane		CAS_RN: 1257261-95-2	CCCCCCCCCCCCCCCCCCC(I)CC(F)(F)C(F)(F)C(F)(F)C(F)(F)C(F)(F)C(F)(F)C(F)(F)C(F)(F)F	CCCCCCCCCCCCCCCCCCC(I)CC(F)(F)C(F)(F)C(F)(F)C(F)(F)C(F)(F)C(F)(F)C(F)(F)C(F)(F)F	C28H40F17I	-0.8061	2243.56	11.2406	12.8556	151.331	3573.03	3.48583	0	0	18.1207	-2.23383	0	1.95429	FALSE	0	0
709	ketone perfluoroalkyl (linear) carboxylic acids, n=3		NA	FC(F)(F)C(=O)C(F)(F)C(F)(F)C(F)(F)S(=O)(O)=O	O=C(C(F)(F)F)C(F)(F)C(F)(F)C(F)(F)S(=O)(=O)O	C5HF9O4S	1.2452	1206.95	3.14735	12.1223	223.357	55.1915	2.31157	7.7935	-4.56581	-28.3411	0	1	0.904394	TRUE	1	0
710	H-substituted perfluoroalkyl (linear) sulfonic acids_ii, n=4		NA	FC(F)(F)C([H])(F)C(F)(F)C(F)(F)C(F)(F)C(F)(F)S(=O)(O)=O	O=S(=O)(O)C(F)(F)C(F)(F)C(F)(F)C(F)(F)C(F)C(F)(F)F	C6H2F12O3S	0.9338	1533.65	4.83241	12.3816	217.956	-64.0798	2.4264	7.8047	0	-58.6192	0	1	0.667781	TRUE	1	0
711	1H,1H,5H,5H-Perfluoro-1,5-pentanediol diacrylate		CAS_RN: 678-95-5	FC(F)(COC(=O)C=C)C(F)(F)C(F)(F)COC(=O)C=C	C=CC(=O)OCC(F)(F)C(F)(F)C(F)(F)COC(=O)C=C	C11H10F6O4	-4.3768	666	2.3811	11.6758	189.088	309.409	2.67214	0	-1.49363	-27.989	-2.29579	0	1.63591	FALSE	0	0
712	(1H,1H,7H-perfluoroheptyl)-2-sulfohexadecanoate sodium salt		CAS_RN: 75032-94-9	[Na+].CCCCCCCCCCCCCCC(C(=O)OCC(F)(F)C(F)(F)C(F)(F)C(F)(F)C(F)(F)C(F)F)S([O-])(=O)=O	CCCCCCCCCCCCCCC(C(=O)OCC(F)(F)C(F)(F)C(F)(F)C(F)(F)C(F)(F)C(F)F)S(=O)(=O)O	C23H34F12O5S	-0.6795	1824.43	5.67624	12.5352	148.269	4309.51	3.3763	9.3021	-2.28227	-7.971	-3.21715	1	1.97269	FALSE	0	0
713	N,N',N''-(Phosphoryltris(oxyethylene))tris(N-ethyl-perfluoroheptane-1-sulphonamide)		CAS_RN: 67939-94-0	C(CO[P](OCCN([S](C(C(C(C(C(C(C(F)(F)F)(F)F)(F)F)(F)F)(F)F)(F)F)(F)F)(=O)=O)CC)(OCCN([S](C(C(C(C(C(C(C(F)(F)F)(F)F)(F)F)(F)F)(F)F)(F)F)(F)F)(=O)=O)CC)=O)N([S](C(C(C(C(C(C(C(F)(F)F)(F)F)(F)F)(F)F)(F)F)(F)F)(F)F)(=O)=O)CC	CCN(CCOP(=O)(OCCN(CC)S(=O)(=O)C(F)(F)C(F)(F)C(F)(F)C(F)(F)C(F)(F)C(F)(F)C(F)(F)F)OCCN(CC)S(=O)(=O)C(F)(F)C(F)(F)C(F)(F)C(F)(F)C(F)(F)C(F)(F)C(F)(F)F)S(=O)(=O)C(F)(F)C(F)(F)C(F)(F)C(F)(F)C(F)(F)C(F)(F)C(F)(F)F	C33H27F45N3O10PS3	-2.7594	6337.21	0	13.9915	187.496	2986.82	3.90568	0	0	-131.677	-2.72337	0	2.11919	FALSE	0	0
714	2-(Tridecafluorohexyl)-5,6-dihydro-2H-pyran-2-ol		CAS_RN: 1401315-55-6	OC1(OCCC=C1)C(F)(F)C(F)(F)C(F)(F)C(F)(F)C(F)(F)C(F)(F)F	OC1(C(F)(F)C(F)(F)C(F)(F)C(F)(F)C(F)(F)C(F)(F)F)C=CCCO1	C11H7F13O2	0.3907	1652.56	9.33326	12.6891	194.143	1720.71	2.69626	9.1994	0	-9.6109	-1.00065	0	1.00084	TRUE	1	0
715	N-Methyl-N-[(3-octadecyl-2-oxo-5-oxazolidinyl)methyl]perfluoro-1-octanesulfonamide		CAS_RN: 138704-55-9	CCCCCCCCCCCCCCCCCCN1CC(CN(C)S(=O)(=O)C(F)(F)C(F)(F)C(F)(F)C(F)(F)C(F)(F)C(F)(F)C(F)(F)C(F)(F)F)OC1=O	CCCCCCCCCCCCCCCCCCN1CC(CN(C)S(=O)(=O)C(F)(F)C(F)(F)C(F)(F)C(F)(F)C(F)(F)C(F)(F)C(F)(F)C(F)(F)F)OC1=O	C31H45F17N2O4S	-1.8237	2657.91	11.2406	13.1181	153.205	6709.7	3.48215	0	-1.15128	12.6692	-1.51431	0	2.87399	FALSE	0	0
716	3-(Ethanesulfinyl)-2-ethyl-4-(1,1,1,2,3,3,3-heptafluoropropan-2-yl)benzoic acid		CAS_RN: 1355554-87-8	CCc1c(ccc(c1S(=O)CC)C(F)(C(F)(F)F)C(F)(F)F)C(O)=O	CCc1c(C(=O)O)ccc(C(F)(C(F)(F)F)C(F)(F)F)c1S(=O)CC	C14H13F7O3S	2.052	1035.81	2.3811	12.3777	207.465	1028.72	3.06156	9.0739	-1.60615	104.39	-0.295517	1	1.13267	TRUE	1	0
717	2,2,3,3,4,4,5,5,6,6,7,7,8,8,8-Pentadecafluorooctyl 4-hydroxybenzoate		CAS_RN: 869308-35-0	Oc1ccc(cc1)C(=O)OCC(F)(F)C(F)(F)C(F)(F)C(F)(F)C(F)(F)C(F)(F)C(F)(F)F	O=C(OCC(F)(F)C(F)(F)C(F)(F)C(F)(F)C(F)(F)C(F)(F)C(F)(F)F)c1ccc(O)cc1	C15H7F15O3	0.5014	1873.47	9.33326	12.7325	214.204	940.086	3.03564	8.9326	-2.01899	-6.742	-3.22955	0	0.95128	TRUE	1	0
718	Allyl 1H,1H-perfluorooctyl ether		CAS_RN: 812-72-6	FC(F)(F)C(F)(F)C(F)(F)C(F)(F)C(F)(F)C(F)(F)C(F)(F)COCC=C	C=CCOCC(F)(F)C(F)(F)C(F)(F)C(F)(F)C(F)(F)C(F)(F)C(F)(F)F	C11H7F15O	-2.4197	1759.31	9.33326	12.6167	204.816	1215.92	2.76924	0	0	-58.2218	-2.80662	0	1.36009	FALSE	0	0
719	Ethyl 6-(nonafluorobutyl)-4-phenyl-2-sulfanylidene-1,2,3,4-tetrahydropyrimidine-5-carboxylate		CAS_RN: 281189-83-1	CCOC(=O)C1=C(NC(=S)NC1c1ccccc1)C(F)(F)C(F)(F)C(F)(F)C(F)(F)F	CCOC(=O)C1=C(C(F)(F)C(F)(F)C(F)(F)C(F)(F)F)NC(=S)NC1c1ccccc1	C17H13F9N2O2S	0.5848	1130.64	3.96541	12.5993	229.131	1399.08	3.11154	0	-2.07641	32.5162	-0.405181	0	1.27418	TRUE	1	0
720	1H,1H-Perfluoropropylamine		CAS_RN: 422-03-7	NCC(F)(F)C(F)(F)F	NCC(F)(F)C(F)(F)F	C3H4F5N	0.9162	178.5	1	10.4775	74.1835	491.986	1.58175	0	0	-7.2011	-1.69792	0	2.43971	FALSE	0	0
721	perfluoroalkanesulfonamido quaternary ammonium diol B, n=5		NA	S(N(CCO)CCC[N+](CCO)(C)C)(=O)(=O)C(F)(F)C(F)(F)C(F)(F)C(F)(F)C(F)(F)F	C[N+](C)(CCO)CCCN(CCO)S(=O)(=O)C(F)(F)C(F)(F)C(F)(F)C(F)(F)C(F)(F)F	C14H22F11N2O4S	-2.9975	1608.88	5.67624	12.6115	144.505	2370.11	3.08122	8.8767	0	4.2903	-1.30651	0	1.60803	FALSE	0	0
722	4,4,5,5,6,6,7,7,8,8,9,9,9-Tridecafluorononyl azide		CAS_RN: 852527-60-7	FC(F)(F)C(F)(F)C(F)(F)C(F)(F)C(F)(F)C(F)(F)CCCN=[N+]=[N-]	[N-]=[N+]=NCCCC(F)(F)C(F)(F)C(F)(F)C(F)(F)C(F)(F)C(F)(F)F	C9H6F13N3	-1.8642	1479.5	7.47342	12.4212	193.078	1579.22	2.78812	0	0	-36.9583	-2.35885	0	1.38686	FALSE	0	0
723	(1Z)-2,2,3,3,4,4,4-Heptafluoro-N-(4-methoxy-2-methylphenyl)butanimidoyl chloride		CAS_RN: 923569-77-1	COC1=CC(C)=C(C=C1)N=C(/Cl)C(F)(F)C(F)(F)C(F)(F)F	COc1ccc(N=C(Cl)C(F)(F)C(F)(F)C(F)(F)F)c(C)c1	C12H9ClF7NO	-2.2009	635.23	2.3811	11.9297	200.382	954.671	2.8143	0	-1.47245	33.5952	0	0	1.4574	FALSE	0	0
724	2,3,3,3-Tetrafluoro-2-[1,1,2,3,3,3-hexafluoro-2-(heptafluoropropoxy)propoxy]propyl prop-2-enoate		CAS_RN: 17559-01-2	FC(F)(F)C(F)(F)C(F)(F)OC(F)(C(F)(F)F)C(F)(F)OC(F)(COC(=O)C=C)C(F)(F)F	C=CC(=O)OCC(F)(OC(F)(F)C(F)(OC(F)(F)C(F)(F)C(F)(F)F)C(F)(F)F)C(F)(F)F	C12H5F17O4	-3.7058	1640.81	9.19158	12.6257	230.895	645.903	3.16476	0	-2.09433	12.2111	-3.19446	0	1.50056	FALSE	0	0
725	2,2,3,3,4,4,4-Heptafluoro-N-(4-methoxyphenyl)butanamide		CAS_RN: 793-36-2	COc1ccc(NC(=O)C(F)(F)C(F)(F)C(F)(F)F)cc1	COc1ccc(NC(=O)C(F)(F)C(F)(F)C(F)(F)F)cc1	C11H8F7NO2	-0.9557	738.88	2.3811	11.8379	177.638	710.463	2.61918	0	-2.76853	24.789	0	0	1.44557	FALSE	0	0
726	ether-substituted Perfluoroalkyl (linear) sulfonic acids, n=9		NA	S(=O)(O)(=O)C(F)(F)C(F)(F)C(F)(F)C(F)(F)C(F)(F)C(F)(F)C(F)(F)C(F)(F)C(F)(F)OC(F)(F)F	O=S(=O)(O)C(F)(F)C(F)(F)C(F)(F)C(F)(F)C(F)(F)C(F)(F)C(F)(F)C(F)(F)C(F)(F)OC(F)(F)F	C10HF21O4S	-0.1758	2903.59	14.4034	13.0921	236.76	61.2929	3.13979	7.8593	0	-91.9423	0	1	0.571212	TRUE	1	0
727	1,1,2,2,3,3,4,4,5,5,6,6,7,7,8,8-Hexadecafluoro-1-[(1,1,1,2,3,3,3-heptafluoropropan-2-yl)oxy]-8-iodooctane		CAS_RN: 25080-19-7	FC(F)(F)C(F)(OC(F)(F)C(F)(F)C(F)(F)C(F)(F)C(F)(F)C(F)(F)C(F)(F)C(F)(F)I)C(F)(F)F	FC(F)(F)C(F)(OC(F)(F)C(F)(F)C(F)(F)C(F)(F)C(F)(F)C(F)(F)C(F)(F)C(F)(F)I)C(F)(F)F	C11F23IO	-1.3241	2658.99	16.0112	13.0607	249.736	-243.178	3.21821	0	0	-112.378	0	0	1.21121	TRUE	1	0
728	2-Iodo-1h,1h,2h,3h,3h-perfluorodecan-1-ol		CAS_RN: 16083-64-0	OCC(I)CC(F)(F)C(F)(F)C(F)(F)C(F)(F)C(F)(F)C(F)(F)C(F)(F)F	OCC(I)CC(F)(F)C(F)(F)C(F)(F)C(F)(F)C(F)(F)C(F)(F)C(F)(F)F	C10H6F15IO	0.6093	1756.39	9.33326	12.6428	215.578	-5567.02	2.97139	8.4549	0	-29.9602	-2.40217	0	2.41473	FALSE	0	0
729	Difluoro(trifluoromethoxy)acetic acid--piperazine (1/1)		CAS_RN: 2266-82-2	C1CNCCN1.OC(=O)C(F)(F)OC(F)(F)F	C1CNCCN1	C4H10N2	-3.1108	33	0	8.7234	31.0837	-181.304	0.933809	0	0	-7.8735	1.13889	0	3.36646	FALSE	0	0
730	1,12-Bis(perfluorodecyl)-2,11-diiodododecane		CAS_RN: 1980048-92-7	FC(F)(F)C(F)(F)C(F)(F)C(F)(F)C(F)(F)C(F)(F)C(F)(F)C(F)(F)C(F)(F)C(F)(F)CC(I)CCCCCCCCC(I)CC(F)(F)C(F)(F)C(F)(F)C(F)(F)C(F)(F)C(F)(F)C(F)(F)C(F)(F)C(F)(F)C(F)(F)F	FC(F)(F)C(F)(F)C(F)(F)C(F)(F)C(F)(F)C(F)(F)C(F)(F)C(F)(F)C(F)(F)C(F)(F)CC(I)CCCCCCCCC(I)CC(F)(F)C(F)(F)C(F)(F)C(F)(F)C(F)(F)C(F)(F)C(F)(F)C(F)(F)C(F)(F)C(F)(F)F	C32H22F42I2	-0.4017	5358.87	0	13.7755	202.257	-4842.54	3.83789	0	0	-49.4218	-2.81402	0	2.5334	FALSE	0	0
731	N-[3-(dimethylamino)propyl]-1,1,2,2,3,3,4,4,4-nonafluorobutane-1-sulphonamide monohydrochloride		CAS_RN: 68957-59-5	Cl.CN(C)CCCNS(=O)(=O)C(F)(F)C(F)(F)C(F)(F)C(F)(F)F	CN(C)CCCNS(=O)(=O)C(F)(F)C(F)(F)C(F)(F)C(F)(F)F	C9H13F9N2O2S	-3.2623	1143.35	3.96541	12.1885	158.959	1770.11	2.7064	0	0	-6.3323	-0.791525	0	1.67323	FALSE	0	0
732	2-(Heptafluoropropyl)-1H-pyrrole		CAS_RN: 118425-75-5	FC(F)(F)C(F)(F)C(F)(F)c1Nccc1	FC(F)(F)C(F)(F)C(F)(F)c1ccc[nH]1	C7H4F7N	0.7348	610.63	2.3811	11.711	184.954	822.2	2.00523	0	0	8.6444	0	0	1.48746	FALSE	0	0
733	1,1,1,2,2,3,3,4,4,5,5,6,6,7,7,8,8-Heptadecafluorotetradecane		CAS_RN: 182130-14-9	CCCCCCC(F)(F)C(F)(F)C(F)(F)C(F)(F)C(F)(F)C(F)(F)C(F)(F)C(F)(F)F	CCCCCCC(F)(F)C(F)(F)C(F)(F)C(F)(F)C(F)(F)C(F)(F)C(F)(F)C(F)(F)F	C14H13F17	-1.2202	2075	11.2406	12.7871	180.083	3795.89	2.97772	0	0	-29.4209	-2.34093	0	1.85844	FALSE	0	0
734	double bond-perfluoroalkyl alcohols, n=11		NA	OC(F)(F)C(F)(F)C(F)(F)C(F)(F)C(F)(F)C(F)(F)C(F)(F)C(F)(F)C(F)(F)C(F)(F)C(F)(F)/C(F)=C(C(F)(F)F)F	OC(F)(F)C(F)(F)C(F)(F)C(F)(F)C(F)(F)C(F)(F)C(F)(F)C(F)(F)C(F)(F)C(F)(F)C(F)(F)C(F)=C(F)C(F)(F)F	C14HF27O	0.7828	3332.75	17.9531	13.2668	238.375	-9.56246	3.21519	7.4264	-5.61646	-163.124	0	0	1.10758	TRUE	1	0
735	multiple H-substituted perfluoroalkyl (linear) carboxylic acids, n=5		NA	[H]C(F)(F)CC(F)(F)CC(F)(F)CC(F)(F)CC(F)(F)CC(F)(F)C(O)=O	O=C(O)C(F)(F)CC(F)(F)CC(F)(F)CC(F)(F)CC(F)(F)CC(F)F	C12H12F12O2	-0.2426	1627.69	2.83812	11.8636	161.336	-2909.9	2.94406	7.9535	-3.07179	-31.1125	-2.97333	1	1.67186	FALSE	0	0
736	Ethyl perfluorononan-1-oate		CAS_RN: 30377-52-7	CCOC(=O)C(F)(F)C(F)(F)C(F)(F)C(F)(F)C(F)(F)C(F)(F)C(F)(F)C(F)(F)F	CCOC(=O)C(F)(F)C(F)(F)C(F)(F)C(F)(F)C(F)(F)C(F)(F)C(F)(F)C(F)(F)F	C11H5F17O2	-2.1008	2154	11.2406	12.8333	220.854	1517.95	2.90641	0	-3.7628	-81.339	-1.32093	0	1.24292	TRUE	1	0
737	Trimethylsilyl 2,3,3,3-tetrafluoro-2-(heptafluoropropoxy)propanoate		CAS_RN: 152718-74-6	C[Si](C)(C)OC(=O)C(F)(OC(F)(F)C(F)(F)C(F)(F)F)C(F)(F)F	C[Si](C)(C)OC(=O)C(F)(OC(F)(F)C(F)(F)C(F)(F)F)C(F)(F)F	C9H9F11O3Si	4.0516	1068.32	4.5088	12.2111	237.615	508.412	2.56623	0	-3.17202	55.1259	0	0	1.48067	FALSE	0	0
738	Methyl perfluorotetradecanoate		CAS_RN: 203302-99-2	COC(=O)C(F)(F)C(F)(F)C(F)(F)C(F)(F)C(F)(F)C(F)(F)C(F)(F)C(F)(F)C(F)(F)C(F)(F)C(F)(F)C(F)(F)C(F)(F)F	COC(=O)C(F)(F)C(F)(F)C(F)(F)C(F)(F)C(F)(F)C(F)(F)C(F)(F)C(F)(F)C(F)(F)C(F)(F)C(F)(F)C(F)(F)C(F)(F)F	C15H3F27O2	-1.3179	3637.19	21.2152	13.3771	232.182	339.458	3.24625	0	-4.13576	-161.981	0	0	1.30653	TRUE	1	0
739	2-{[(3,3,4,4,5,5,6,6,7,7,8,8,8-Tridecafluorooctyl)oxy]methyl}oxirane		CAS_RN: 122193-68-4	FC(F)(F)C(F)(F)C(F)(F)C(F)(F)C(F)(F)C(F)(F)CCOCC1CO1	FC(F)(F)C(F)(F)C(F)(F)C(F)(F)C(F)(F)C(F)(F)CCOCC1CO1	C11H9F13O2	-2.3126	1502.79	7.47342	12.4811	184.7	1532.31	2.81028	0	0	-30.2589	-2.35121	0	1.43578	FALSE	0	0
740	5-(Perfluorooctyl)-1,3-bis(bis(trifluoromethyl)hydroxymethyl)benzene		CAS_RN: 89780-02-9	OC(C1=CC(=CC(=C1)C(F)(F)C(F)(F)C(F)(F)C(F)(F)C(F)(F)C(F)(F)C(F)(F)C(F)(F)F)C(O)(C(F)(F)F)C(F)(F)F)(C(F)(F)F)C(F)(F)F	OC(c1cc(C(F)(F)C(F)(F)C(F)(F)C(F)(F)C(F)(F)C(F)(F)C(F)(F)C(F)(F)F)cc(C(O)(C(F)(F)F)C(F)(F)F)c1)(C(F)(F)F)C(F)(F)F	C20H5F29O2	2.0308	3820.85	19.4125	13.4539	230.164	818.153	3.3861	9.2316	0	115.542	0	0	1.33543	TRUE	1	0
741	Methyl perfluoro(2-propoxypropanoate)		CAS_RN: 13140-34-6	COC(=O)C(F)(OC(F)(F)C(F)(F)C(F)(F)F)C(F)(F)F	COC(=O)C(F)(OC(F)(F)C(F)(F)C(F)(F)F)C(F)(F)F	C7H3F11O3	-4.5688	1023.25	4.5088	12.0929	218.042	322.19	2.53394	0	-3.29847	-7.0565	0	0	1.55816	FALSE	0	0
742	1-H-Perflurodecane		CAS_RN: 375-97-3	FC(F)C(F)(F)C(F)(F)C(F)(F)C(F)(F)C(F)(F)C(F)(F)C(F)(F)C(F)(F)C(F)(F)F	FC(F)C(F)(F)C(F)(F)C(F)(F)C(F)(F)C(F)(F)C(F)(F)C(F)(F)C(F)(F)C(F)(F)F	C10HF21	-0.8865	2494.06	13.1851	12.9448	230.757	9.04093	2.83827	0	0	-125.716	0	0	1.11181	TRUE	1	0
743	2-Propenoic acid, 2-methyl-, 2-[ethyl[(nonafluorobutyl)sulfonyl]amino]ethyl ester		CAS_RN: 67939-33-7	C(N([S](=O)(=O)C(F)(F)C(F)(F)C(F)(F)C(F)(F)F)CCOC(=O)C(=C)C)C	C=C(C)C(=O)OCCN(CC)S(=O)(=O)C(F)(F)C(F)(F)C(F)(F)C(F)(F)F	C12H14F9NO4S	-3.7325	1270.22	3.96541	12.3578	168.345	1482.19	2.99526	0	-1.09081	4.32	-1.14139	0	1.59468	FALSE	0	0
744	2,2,3,3,4,4,5,5,6,6,7,7,8,8,8-Pentadecafluoro-N-(4-methoxyphenyl)octanamide		CAS_RN: 103188-04-1	COc1ccc(NC(=O)C(F)(F)C(F)(F)C(F)(F)C(F)(F)C(F)(F)C(F)(F)C(F)(F)F)cc1	COc1ccc(NC(=O)C(F)(F)C(F)(F)C(F)(F)C(F)(F)C(F)(F)C(F)(F)C(F)(F)F)cc1	C15H8F15NO2	-0.4926	1926.31	9.33326	12.7778	205.431	1232.01	3.00293	0	-3.51478	-22.0909	0	0	1.1785	TRUE	1	0
745	1-Butanesulfonamide, 1,1,2,2,3,3,4,4,4-nonafluoro-N-(2-hydroxyethyl)-N-methyl-		CAS_RN: 34454-97-2	CN(CCO)S(=O)(=O)C(F)(F)C(F)(F)C(F)(F)C(F)(F)F	CN(CCO)S(=O)(=O)C(F)(F)C(F)(F)C(F)(F)C(F)(F)F	C7H8F9NO3S	-2.0021	1164.18	3.96541	12.2562	167.217	528.892	2.66576	8.3147	0	-14.5293	-1.15083	0	1.17796	TRUE	1	0
746	1-(Perfluorooctyl)nonanol sulfate sodium		CAS_RN: 799267-73-5	[Na+].CCCCCCCCC(OS([O-])(=O)=O)C(F)(F)C(F)(F)C(F)(F)C(F)(F)C(F)(F)C(F)(F)C(F)(F)C(F)(F)F	CCCCCCCCC(OS(=O)(=O)O)C(F)(F)C(F)(F)C(F)(F)C(F)(F)C(F)(F)C(F)(F)C(F)(F)C(F)(F)F	C17H19F17O4S	-1.0221	2243.22	11.2406	12.9323	178.045	4583.42	3.2953	8.6294	0	-11.0164	-1.77362	1	1.86696	FALSE	0	0
747	Perfluorotridecyl iodide		CAS_RN: 376-04-5	FC(F)(F)C(F)(F)C(F)(F)C(F)(F)C(F)(F)C(F)(F)C(F)(F)C(F)(F)C(F)(F)C(F)(F)C(F)(F)C(F)(F)C(F)(F)I	FC(F)(F)C(F)(F)C(F)(F)C(F)(F)C(F)(F)C(F)(F)C(F)(F)C(F)(F)C(F)(F)C(F)(F)C(F)(F)C(F)(F)C(F)(F)I	C13F27I	-0.506	3385.74	21.2152	13.3221	249.889	-189.799	3.32917	0	0	-174.252	0	0	1.30635	TRUE	1	0
748	3,3,4,4,5,5,6,6,6-Nonafluorohexane-1,2-diol		CAS_RN: 124995-00-2	OCC(O)C(F)(F)C(F)(F)C(F)(F)C(F)(F)F	OCC(O)C(F)(F)C(F)(F)C(F)(F)C(F)(F)F	C6H5F9O2	2.2395	1031.13	3.96541	11.936	164.409	1015.65	2.27772	8.1697	0	-18.3919	-2.11456	0	1.27312	TRUE	1	0
749	1H,1H,2H,2H-Perfluorotetradecanol sulfate ammonium salt		CAS_RN: 63225-59-2	[NH4+].[O-]S(=O)(=O)OCCC(F)(F)C(F)(F)C(F)(F)C(F)(F)C(F)(F)C(F)(F)C(F)(F)C(F)(F)C(F)(F)C(F)(F)C(F)(F)C(F)(F)F	O=S(=O)(O)OCCC(F)(F)C(F)(F)C(F)(F)C(F)(F)C(F)(F)C(F)(F)C(F)(F)C(F)(F)C(F)(F)C(F)(F)C(F)(F)C(F)(F)F	C14H5F25O4S	-0.7338	3324.18	19.1782	13.2841	220.592	402.62	3.33831	8.1215	0	-122.651	-3.39711	1	0.945379	TRUE	1	0
750	3-(1,1,2,2-tetrafluoroethoxy)propene		CAS_RN: 1428-33-7	FC(F)C(F)(F)OCC=C	C=CCOC(F)(F)C(F)F	C5H6F4O	-7.125	110.83	0	10.111	146.179	436.171	1.58175	0	0	4.341	-0.585972	0	2.51286	FALSE	0	0
751	Poly(oxy-1,2-ethanediyl), .alpha.-[2-[[(perfluorooctyl)sulfonyl]propylamino]ethyl]-.omega.-hydroxy-		CAS_RN: 52550-45-5	CCCN(CCOCCO)S(=O)(=O)C(F)(F)C(F)(F)C(F)(F)C(F)(F)C(F)(F)C(F)(F)C(F)(F)C(F)(F)F	CCCN(CCOCCO)S(=O)(=O)C(F)(F)C(F)(F)C(F)(F)C(F)(F)C(F)(F)C(F)(F)C(F)(F)C(F)(F)F	C15H16F17NO4S	-1.906	2397.67	11.2406	13.0089	185.851	3175.81	3.25785	8.4691	0	-51.1192	-1.38272	0	1.45617	FALSE	0	0
752	ether-substituted perfluoroalkyl (linear) caborxylic acids_ii, n=14		NA	FC(F)(F)OC(F)(F)C(F)(F)C(F)(F)C(F)(F)C(F)(F)C(F)(F)C(F)(F)C(F)(F)C(F)(F)C(F)(F)C(F)(F)C(F)(F)C(F)(F)C(F)(F)C(O)=O	O=C(O)C(F)(F)C(F)(F)C(F)(F)C(F)(F)C(F)(F)C(F)(F)C(F)(F)C(F)(F)C(F)(F)C(F)(F)C(F)(F)C(F)(F)C(F)(F)C(F)(F)OC(F)(F)F	C16HF31O3	0.0609	4293.81	24.687	13.5031	239.387	51.571	3.40059	7.6603	-4.80757	-163.054	0	1	1.07756	TRUE	1	0
753	Oxetane, 3-methyl-3-[[(3,3,4,4,5,5,6,6,6-nonafluorohexyl)oxy]methyl]-		CAS_RN: 475678-78-5	CC1(COCCC(F)(F)C(F)(F)C(F)(F)C(F)(F)F)COC1	CC1(COCCC(F)(F)C(F)(F)C(F)(F)C(F)(F)F)COC1	C11H13F9O2	-2.6089	979.13	3.71151	12.0636	172.22	727.864	2.57076	0	0	24.012	-1.96964	0	1.55698	FALSE	0	0
754	1,1,1,2,2,3,3,4,4,5,5,6,6,7,7,8,8-Heptadecafluoroundecane		CAS_RN: 1835250-28-6	CCCC(F)(F)C(F)(F)C(F)(F)C(F)(F)C(F)(F)C(F)(F)C(F)(F)C(F)(F)F	CCCC(F)(F)C(F)(F)C(F)(F)C(F)(F)C(F)(F)C(F)(F)C(F)(F)C(F)(F)F	C11H7F17	-1.2556	2045.25	11.2406	12.772	202.442	2153.85	2.81928	0	0	-60.0213	-2.38259	0	1.38277	FALSE	0	0
755	(3β)-25,26,26,26,27,27,27-Heptafluoro-cholest-5-en-3-ol		CAS_RN: 153463-21-9	[H]C(C)(CCCC(F)(C(F)(F)F)C(F)(F)F)[C@@]1([H])CC[C@@]2([H])[C@]3([H])CC=C4C[C@@]([H])(O)CC[C@]4(C)[C@@]3([H])CC[C@]12C	CC(CCCC(F)(C(F)(F)F)C(F)(F)F)[C@H]1CC[C@H]2[C@@H]3CC=C4C[C@@H](O)CC[C@]4(C)[C@H]3CC[C@@]21C	C27H39F7O	3.4145	1238.53	2.26244	12.8605	119.785	555.888	3.21821	10.1667	1.39635	133.908	-1.56976	0	1.92195	FALSE	0	0
756	1,1,1,2,2,3,3-heptafluorobutane		CAS_RN: 662-00-0	CC(F)(F)C(F)(F)C(F)(F)F	CC(F)(F)C(F)(F)C(F)(F)F	C4H3F7	-3.6116	483.75	2.3811	11.1561	74.1835	-87.6562	1.58175	0	0	-24.7065	0	0	2.43223	FALSE	0	0
757	2-C-(Heptafluoropropyl)-α-D-ribofuranose		CAS_RN: 467220-81-1	[H][C@]1(CO)O[C@]([H])(O)[C@](O)([C@]1([H])O)C(F)(F)C(F)(F)C(F)(F)F	OC[C@H]1O[C@H](O)[C@@](O)(C(F)(F)C(F)(F)C(F)(F)F)[C@@H]1O	C8H9F7O5	4.6339	1116.08	3.96541	12.3904	145.601	1120.11	2.52147	9.2904	0	31.1305	-1.3113	0	1.54769	FALSE	0	0
758	Perfluorodecahydro-2-n-butylnaphthalene		CAS_RN: 119107-96-9	FC(F)(F)C(F)(F)C(F)(F)C(F)(F)C1(F)C(F)(F)C(F)(F)C2(F)C(F)(F)C(F)(F)C(F)(F)C(F)(F)C2(F)C1(F)F	FC(F)(F)C(F)(F)C(F)(F)C(F)(F)C1(F)C(F)(F)C(F)(F)C2(F)C(F)(F)C(F)(F)C(F)(F)C(F)(F)C2(F)C1(F)F	C14F26	0.5452	4318.31	31.0774	13.8867	237.816	-92.6432	3.17491	0	0	-83.9279	0	0	1.44258	FALSE	0	0
759	2-Propenoic acid, 2-[ethyl[(nonafluorobutyl)sulfonyl]amino]ethyl ester		CAS_RN: 17329-79-2	C(N([S](=O)(=O)C(F)(F)C(F)(F)C(F)(F)C(F)(F)F)CCOC(=O)C=C)C	C=CC(=O)OCCN(CC)S(=O)(=O)C(F)(F)C(F)(F)C(F)(F)C(F)(F)F	C11H12F9NO4S	-3.928	1232.39	3.96541	12.336	164.991	1526.58	2.95786	0	-1.13711	-5.6078	-1.14083	0	1.62353	FALSE	0	0
760	2,2,3,4,4,4-Hexafluorobutyl nonafluorobutane-1-sulfonate		CAS_RN: 1205020-79-6	FC(C(F)(F)F)C(F)(F)COS(=O)(=O)C(F)(F)C(F)(F)C(F)(F)C(F)(F)F	O=S(=O)(OCC(F)(F)C(F)C(F)(F)F)C(F)(F)C(F)(F)C(F)(F)C(F)(F)F	C8H3F15O3S	-2.3212	1554.9	4.54032	12.4323	214.595	-693.477	2.71142	0	0	-39.3562	-3.50433	0	1.47916	FALSE	0	0
761	1,1,1,2,2,3,3,4,4,5,5,6,6,7,7-Pentadecafluoro-9-iodopentadecane		CAS_RN: 918-32-1	CCCCCCC(I)CC(F)(F)C(F)(F)C(F)(F)C(F)(F)C(F)(F)C(F)(F)C(F)(F)F	CCCCCCC(I)CC(F)(F)C(F)(F)C(F)(F)C(F)(F)C(F)(F)C(F)(F)C(F)(F)F	C15H16F15I	-1.1192	1799	9.33326	12.6629	182.786	-1115.25	3.15083	0	0	4.6705	-2.12873	0	1.40346	FALSE	0	0
762	N,N'-(Propane-1,3-diyl)bis(2,2,3,3,4,4,5,5,6,6,7,7,8,8,8-pentadecafluorooctanamide)		CAS_RN: 29680-98-6	FC(F)(F)C(F)(F)C(F)(F)C(F)(F)C(F)(F)C(F)(F)C(F)(F)C(=O)NCCCNC(=O)C(F)(F)C(F)(F)C(F)(F)C(F)(F)C(F)(F)C(F)(F)C(F)(F)F	O=C(NCCCNC(=O)C(F)(F)C(F)(F)C(F)(F)C(F)(F)C(F)(F)C(F)(F)C(F)(F)F)C(F)(F)C(F)(F)C(F)(F)C(F)(F)C(F)(F)C(F)(F)C(F)(F)F	C19H8F30N2O2	-0.0486	3733.54	15.2888	13.3782	210.813	3195.54	3.48538	0	-4.14766	-122.931	-2.13493	0	1.67045	FALSE	0	0
763	Perfluorotetradecanedioic acid dihydrazide		CAS_RN: 5102-53-4	NNC(=O)C(F)(F)C(F)(F)C(F)(F)C(F)(F)C(F)(F)C(F)(F)C(F)(F)C(F)(F)C(F)(F)C(F)(F)C(F)(F)C(F)(F)C(=O)NN	NNC(=O)C(F)(F)C(F)(F)C(F)(F)C(F)(F)C(F)(F)C(F)(F)C(F)(F)C(F)(F)C(F)(F)C(F)(F)C(F)(F)C(F)(F)C(=O)NN	C14H6F24N4O2	4.6291	3523.25	19.1782	13.3452	221.833	1402.77	3.24672	0	-4.06219	-179.953	0	0	1.51504	FALSE	0	0
764	perfluoroalkanesulfonamido quaternary ammonium triol sulfonic acid, n=3		NA	S(N(CCCS(O)(=O)=O)C(CO)CC[N+](CC(CO)O)(C)C)(=O)(=O)C(F)(F)C(F)(F)C(F)(F)F	C[N+](C)(CCC(CO)N(CCCS(=O)(=O)O)S(=O)(=O)C(F)(F)C(F)(F)C(F)(F)F)CC(O)CO	C15H27F7N2O8S2	-1.0241	1177.6	2.3811	12.3917	146.723	1120.03	3.21732	9.5806	0	31.8087	-1.28289	1	1.30157	TRUE	1	0
765	multiple H-substituted, multiple ether-substituted perfluoroalkyl alcohols, n=5, m=19		NA	FC(F)(F)C(F)(F)C(F)(F)C(F)(F)C(F)(F)C(F)(F)C(F)(F)C(F)(F)C(F)(F)C(F)(F)CCOCCOCCOCCOCCOCCOCCOCCOCCOCCOCCOCCOCCOCCOCCOCCOCCOCCOCCO[H]	OCCOCCOCCOCCOCCOCCOCCOCCOCCOCCOCCOCCOCCOCCOCCOCCOCCOCCOCCC(F)(F)C(F)(F)C(F)(F)C(F)(F)C(F)(F)C(F)(F)C(F)(F)C(F)(F)C(F)(F)C(F)(F)F	C48H77F21O19	-5.7646	3179.88	15.1596	13.1607	131.399	5178.04	3.48271	8.5941	0	-58.4693	-2.85524	0	2.63069	FALSE	0	0
766	Perfluoro-2-methyldecalin		CAS_RN: 306-95-6	FC(F)(F)C1(F)C(F)(F)C(F)(F)C2(F)C(F)(F)C(F)(F)C(F)(F)C(F)(F)C2(F)C1(F)F	FC(F)(F)C1(F)C(F)(F)C(F)(F)C2(F)C(F)(F)C(F)(F)C(F)(F)C(F)(F)C2(F)C1(F)F	C11F20	0.6882	3658.5	23.9214	13.6939	226.256	-144.693	2.97807	0	0	-47.0259	0	0	1.25793	TRUE	1	0
767	Bis(3,3,4,4,5,5,6,6,6-nonafluorohexyl) butanedioate		CAS_RN: 508194-70-5	FC(F)(F)C(F)(F)C(F)(F)C(F)(F)CCOC(=O)CCC(=O)OCCC(F)(F)C(F)(F)C(F)(F)C(F)(F)F	O=C(CCC(=O)OCCC(F)(F)C(F)(F)C(F)(F)C(F)(F)F)OCCC(F)(F)C(F)(F)C(F)(F)C(F)(F)F	C16H12F18O4	-2.5156	1900.08	5.20895	12.5915	175.7	1673.4	3.29125	0	-1.81451	-3.3274	-2.58957	0	1.50847	FALSE	0	0
768	1,1,2,3,3,4,4,5,5,6,6,7,7,8,8,9,9,10,10,11,11,11-Docosafluoroundec-1-ene		CAS_RN: 66256-52-8	FC(F)=C(F)C(F)(F)C(F)(F)C(F)(F)C(F)(F)C(F)(F)C(F)(F)C(F)(F)C(F)(F)C(F)(F)F	FC(F)=C(F)C(F)(F)C(F)(F)C(F)(F)C(F)(F)C(F)(F)C(F)(F)C(F)(F)C(F)(F)C(F)(F)F	C11F22	-0.7348	2649.31	13.1851	12.9884	240.51	-10.8497	2.93105	0	-5.04909	-126.588	0	0	1.24381	TRUE	1	0
769	2,2,3,3,4,4,4-Heptafluoro-N-(nonafluorobutyl)butanimidoyl fluoride		CAS_RN: 103573-07-5	FC(=NC(F)(F)C(F)(F)C(F)(F)C(F)(F)F)C(F)(F)C(F)(F)C(F)(F)F	FC(=NC(F)(F)C(F)(F)C(F)(F)C(F)(F)F)C(F)(F)C(F)(F)C(F)(F)F	C8F17N	-1.9648	1565.38	6.9491	12.4483	239.087	11.1317	2.66755	0	-4.96993	-75.8486	0	0	1.32822	TRUE	1	0
770	1,1,2,2,3,3,4,4,5,5,6,6,6-Tridecafluorohexane-1-sulphonyl chloride		CAS_RN: 55591-23-6	O=[S](C(C(C(C(C(C(F)(F)F)(F)F)(F)F)(F)F)(F)F)(F)F)(=O)Cl	O=S(=O)(Cl)C(F)(F)C(F)(F)C(F)(F)C(F)(F)C(F)(F)C(F)(F)F	C6ClF13O2S	-0.3005	1555.43	7.47342	12.5486	249.089	-77.7803	2.6056	0	0	-67.9674	0	0	1.17269	TRUE	1	0
771	Erbium, tris(6,6,7,7,8,8,8-heptafluoro-2,2-dimethyl-3,5-octanedionato-βO3,βO5)-		CAS_RN: 17978-75-5	[Er+3].CC(C)(C)C([O-])=CC(=O)C(F)(F)C(F)(F)C(F)(F)F.CC(C)(C)C([O-])=CC(=O)C(F)(F)C(F)(F)C(F)(F)F.CC(C)(C)C([O-])=CC(=O)C(F)(F)C(F)(F)C(F)(F)F	CC(C)(C)C(O)=CC(=O)C(F)(F)C(F)(F)C(F)(F)F	C10H11F7O2	-0.486	808.73	2.40685	11.795	156.15	534.57	2.36546	9.1688	-2.81736	39.3053	0	0	1.35369	TRUE	1	0
772	n:2 fluorotelomer thio alkyl amido carboxylic acids, n=4		CAS_RN: 1383438-89-8	FC(F)(F)C(F)(F)C(F)(F)C(F)(F)C(F)(F)C(F)(F)C(F)(F)C(F)(F)CCSC(C(O)=O)CC(NCCCN(C)C)=O	CN(C)CCCNC(=O)CC(SCCC(F)(F)C(F)(F)C(F)(F)C(F)(F)C(F)(F)C(F)(F)C(F)(F)C(F)(F)F)C(=O)O	C19H21F17N2O3S	-0.8414	2247.82	11.2406	12.8742	175.372	2107.02	3.35173	9.0965	-1.82401	-6.382	-2.65478	1	1.13051	TRUE	1	0
773	Benzyl 2,3,3,3-tetrafluoro-2-[1,1,2,3,3,3-hexafluoro-2-(heptafluoropropoxy)propoxy]propanoate		CAS_RN: 140229-81-8	FC(F)(F)C(F)(F)C(F)(F)OC(F)(C(F)(F)F)C(F)(F)OC(F)(C(=O)OCc1ccccc1)C(F)(F)F	O=C(OCc1ccccc1)C(F)(OC(F)(F)C(F)(OC(F)(F)C(F)(F)C(F)(F)F)C(F)(F)F)C(F)(F)F	C16H7F17O4	-2.2934	1801.15	9.19158	12.7327	227.503	1552.51	3.18395	0	-3.69404	75.2051	-1.4417	0	1.4866	FALSE	0	0
774	N,N'-1,3-Phenylenebis(perfluorobutanamide)		CAS_RN: 524726-48-5	FC(F)(F)C(F)(F)C(F)(F)C(=O)NC1=CC(NC(=O)C(F)(F)C(F)(F)C(F)(F)F)=CC=C1	O=C(Nc1cccc(NC(=O)C(F)(F)C(F)(F)C(F)(F)F)c1)C(F)(F)C(F)(F)C(F)(F)F	C14H6F14N2O2	0.9868	1395.56	3.4492	12.4446	221.702	1050.07	2.93649	0	-3.25256	17.2541	0	0	1.24451	TRUE	1	0
775	1,1,1,2,2,3,3,4,4-Nonafluorotetradecane		CAS_RN: 214196-02-8	CCCCCCCCCCC(F)(F)C(F)(F)C(F)(F)C(F)(F)F	CCCCCCCCCCC(F)(F)C(F)(F)C(F)(F)C(F)(F)F	C14H21F9	-1.7396	933.75	3.96541	11.8765	130.782	2967.1	2.83657	0	0	22.3822	-1.70771	0	2.01769	FALSE	0	0
776	5,5,6,6,7,7,7-Heptafluoroheptan-3-amine		CAS_RN: 679-00-5	CCC(N)CC(F)(F)C(F)(F)C(F)(F)F	CCC(N)CC(F)(F)C(F)(F)C(F)(F)F	C7H10F7N	-0.0187	636.63	2.3811	11.4651	124.537	1231.86	2.00979	0	0	9.5837	-1.6984	0	1.86449	FALSE	0	0
777	1,2,3,4,5-Pentafluoro-6-(pentafluoroethoxy)benzene		CAS_RN: 159752-92-8	Fc1c(F)c(F)c(OC(F)(F)C(F)(F)F)c(F)c1F	Fc1c(F)c(F)c(OC(F)(F)C(F)(F)F)c(F)c1F	C8F10O	-1.278	506.17	1	11.8106	265.088	42.9361	2.10183	0	0	-25.9969	0	0	1.51373	FALSE	0	0
778	perfluoroethanesulfonamido ethanol, n =2		NA	N(CCO)S(=O)(=O)C(F)(F)C(F)(F)F	O=S(=O)(NCCO)C(F)(F)C(F)(F)F	C4H6F5NO3S	0.7737	507.59	1	11.3638	153.913	1164.37	1.58175	8.0687	0	2.67	-0.844742	0	1.55301	FALSE	0	0
779	Perfluoro-2-(2-ethoxyethoxy)-1,1-diphenylethan-1-ol		CAS_RN: 217824-95-8	OC(C1=C(F)C(F)=C(F)C(F)=C1F)(C1=C(F)C(F)=C(F)C(F)=C1F)C(F)(F)OC(F)(F)C(F)(F)OC(F)(F)C(F)(F)F	OC(c1c(F)c(F)c(F)c(F)c1F)(c1c(F)c(F)c(F)c(F)c1F)C(F)(F)OC(F)(F)C(F)(F)OC(F)(F)C(F)(F)F	C18HF21O3	0.6987	1887.1	5.26933	13.0615	255.41	203.113	3.04927	10.1817	0	-12.3887	0	0	0.955636	TRUE	1	0
780	4-(3,3,4,4,5,5,6,6,6-Nonafluorohexyl)aniline		CAS_RN: 919289-98-8	NC1=CC=C(CCC(F)(F)C(F)(F)C(F)(F)C(F)(F)F)C=C1	Nc1ccc(CCC(F)(F)C(F)(F)C(F)(F)C(F)(F)F)cc1	C12H10F9N	2.526	915.67	3.96541	12.0096	162.292	1012.65	2.61918	0	0	31.8352	-1.87938	0	1.55669	FALSE	0	0
781	n:1:2 fluorotelomer betaine-related, n=3		NA	C[N+](CC(O)=O)(C)CCC(F)C(F)(F)C(F)(F)C(F)(F)C(F)(F)C(F)(F)C(F)(F)C(F)(F)F	C[N+](C)(CCC(F)C(F)(F)C(F)(F)C(F)(F)C(F)(F)C(F)(F)C(F)(F)C(F)(F)F)CC(=O)O	C14H13F16NO2	-2.5478	2041.23	9.33326	12.762	166.275	1587.59	3.10806	8.5264	-1.64676	-37.7204	-1.97259	1	1.08061	TRUE	1	0
782	Methyl 4,4,5,5,6,6,7,7,7-nonafluoro-3-oxoheptanoate		CAS_RN: 89129-70-4	COC(=O)CC(=O)C(F)(F)C(F)(F)C(F)(F)C(F)(F)F	COC(=O)CC(=O)C(F)(F)C(F)(F)C(F)(F)C(F)(F)F	C8H5F9O3	-3.2127	1048.08	3.96541	12.0169	187.606	323.966	2.52283	0	-3.1266	-10.2665	-2.09025	0	1.47799	FALSE	0	0
783	Bis(4,4,5,5,6,6,7,7,8,8,9,9,9-tridecafluorononyl) diazene-1,2-dicarboxylate		CAS_RN: 462996-01-6	FC(F)(F)C(F)(F)C(F)(F)C(F)(F)C(F)(F)C(F)(F)CCCOC(=O)N=NC(=O)OCCCC(F)(F)C(F)(F)C(F)(F)C(F)(F)C(F)(F)C(F)(F)F	O=C(N=NC(=O)OCCCC(F)(F)C(F)(F)C(F)(F)C(F)(F)C(F)(F)C(F)(F)F)OCCCC(F)(F)C(F)(F)C(F)(F)C(F)(F)C(F)(F)C(F)(F)F	C20H12F26N2O4	-2.4012	3024.92	9.98842	13.1454	195.925	3166.71	3.41061	0	-2.30676	-64.3607	-2.83955	0	1.71348	FALSE	0	0
784	3,3,4,4,5,5,6,6,7,7,8,8,9,9,10,10,11,11,12,12,12-Henicosafluorododecanoyl chloride		CAS_RN: 64018-26-4	C(C(F)(F)C(F)(F)C(F)(F)C(F)(F)C(F)(F)C(F)(F)C(F)(F)C(F)(F)C(F)(F)C(F)(F)F)C(Cl)=O	O=C(Cl)CC(F)(F)C(F)(F)C(F)(F)C(F)(F)C(F)(F)C(F)(F)C(F)(F)C(F)(F)C(F)(F)C(F)(F)F	C12H2ClF21O	-0.7077	2708.46	15.1596	13.0605	237.137	-680.127	3.11284	0	-2.10824	-105.173	-3.13596	0	1.24326	TRUE	1	0
785	double bond-, H-substituted perfluoroalkyl sulfonic acids, n=4_i		NA	FC(C(F)(F)OC(F)(F)C(F)(F)C(F)(F)C(F)(F)/C(F)=C([H])F)(F)S(=O)(O)=O	O=S(=O)(O)C(F)(F)C(F)(F)OC(F)(F)C(F)(F)C(F)(F)C(F)(F)C(F)=CF	C8H2F14O4S	-0.2854	1715.66	6.23898	12.5318	233.032	213.108	2.71031	7.8856	-4.09176	-86.3782	0	1	0.645449	TRUE	1	0
786	1,1,1,2,2,3,3-heptafluoronon-4-ene		CAS_RN: 57325-40-3	CCCCC=CC(F)(F)C(F)(F)C(F)(F)F	CCCCC=CC(F)(F)C(F)(F)C(F)(F)F	C9H11F7	-2.4607	571.75	2.3811	11.3959	142.052	1848.72	2.30812	0	0	19.9827	0.0416936	0	1.9072	FALSE	0	0
787	1,1,2,2,3,3,4,4-Octafluoro-1,4-bis[(1,1,1,2,3,3,3-heptafluoropropan-2-yl)oxy]butane		CAS_RN: 23228-90-2	FC(F)(F)C(F)(OC(F)(F)C(F)(F)C(F)(F)C(F)(F)OC(F)(C(F)(F)F)C(F)(F)F)C(F)(F)F	FC(F)(F)C(F)(OC(F)(F)C(F)(F)C(F)(F)C(F)(F)OC(F)(C(F)(F)F)C(F)(F)F)C(F)(F)F	C10F22O2	-2.5703	2350.13	12.9521	12.8607	236.599	-18.206	3.21821	0	0	-44.589	0	0	1.25532	TRUE	1	0
788	(Perfluorocyclohexyl)methyl methacrylate		CAS_RN: 25965-83-7	CC(=C)C(=O)OCC1(F)C(F)(F)C(F)(F)C(F)(F)C(F)(F)C1(F)F	C=C(C)C(=O)OCC1(F)C(F)(F)C(F)(F)C(F)(F)C(F)(F)C1(F)F	C11H7F11O2	-1.2018	1741.29	9.12547	12.8352	199.415	775.927	2.55617	0	-1.8726	-47.196	-3.04171	0	1.23447	TRUE	1	0
789	Piperidinium perfluorooctanesulfonate		CAS_RN: 71463-74-6	C1CC[NH2+]CC1.[O-]S(=O)(=O)C(F)(F)C(F)(F)C(F)(F)C(F)(F)C(F)(F)C(F)(F)C(F)(F)C(F)(F)F	O=S(=O)(O)C(F)(F)C(F)(F)C(F)(F)C(F)(F)C(F)(F)C(F)(F)C(F)(F)C(F)(F)F	C8HF17O3S	0.8043	2248.09	11.2406	12.8772	233.668	93.9139	2.77903	7.8164	0	-94.6839	0	1	0.496583	TRUE	1	0
790	Perfluoro(2-methylpent-2-ene)		CAS_RN: 1584-03-8	FC(=C(C(F)(F)F)C(F)(F)F)C(F)(F)C(F)(F)F	FC(=C(C(F)(F)F)C(F)(F)F)C(F)(F)C(F)(F)F	C6F12	-1.3832	1295.13	2.33482	11.8365	225.435	-108.497	1.58175	0	-4.64352	0	0	0	1.53246	FALSE	0	0
791	4-Bromo-2-(heptafluoropropyl)pyridine		CAS_RN: 1816283-37-0	FC(F)(F)C(F)(F)C(F)(F)c1cc(Br)ccn1	FC(F)(F)C(F)(F)C(F)(F)c1cc(Br)ccn1	C8H3BrF7N	-1.1826	606.76	2.3811	11.7944	241.587	-1772.64	2.43705	0	0	19.7321	0	0	1.64734	FALSE	0	0
792	2,2,4,5,5,5-Hexafluoro-3,3,4-tris(trifluoromethyl)pentanoic acid		CAS_RN: 1882109-74-1	OC(=O)C(F)(F)C(C(F)(F)F)(C(F)(F)F)C(F)(C(F)(F)F)C(F)(F)F	O=C(O)C(F)(F)C(C(F)(F)F)(C(F)(F)F)C(F)(C(F)(F)F)C(F)(F)F	C8HF15O2	1.2039	2935.5	11.3995	12.9302	192.486	-216.908	2.68055	7.747	-4.72438	66.6233	0	1	1.03487	TRUE	1	0
793	N-Ethyl--N-[2-(phosphonooxy)ethyl]perfluoroheptanesulfonamide		CAS_RN: 67923-61-9	C(N([S](=O)(=O)C(F)(F)C(F)(F)C(F)(F)C(F)(F)C(F)(F)C(F)(F)C(F)(F)F)CCO[P](=O)(O)O)C	CCN(CCOP(=O)(O)O)S(=O)(=O)C(F)(F)C(F)(F)C(F)(F)C(F)(F)C(F)(F)C(F)(F)C(F)(F)F	C11H11F15NO6PS	-1.1748	2131.65	9.33326	12.8941	179.692	809.924	3.21274	8.484	0	-47.0073	-1.69508	2	0.948774	TRUE	1	0
794	5-(Heptafluoropropyl)uridine		CAS_RN: 144862-38-4	OC[C@H]1O[C@H]([C@H](O)[C@@H]1O)N1C=C(C(=O)NC1=O)C(F)(F)C(F)(F)C(F)(F)F	O=c1[nH]c(=O)n([C@@H]2O[C@H](CO)[C@@H](O)[C@H]2O)cc1C(F)(F)C(F)(F)C(F)(F)F	C12H11F7N2O6	2.2538	1069.35	2.3811	12.4437	183.016	1012.14	2.90296	9.7355	-2.42855	40.9179	-0.91469	0	1.12644	TRUE	1	0
795	perfluoroalkanesulfonamido quaternary ammonium sulfonate carboxylate A, n=3		NA	S(N(CC(O)=O)CCC[N+](CCCS(=O)(O)=O)(C)C)(=O)(=O)C(F)(F)C(F)(F)C(F)(F)F	C[N+](C)(CCCN(CC(=O)O)S(=O)(=O)C(F)(F)C(F)(F)C(F)(F)F)CCCS(=O)(=O)O	C13H21F7N2O7S2	-2.4728	1073.13	2.3811	12.2676	145.347	406.661	3.12916	8.8129	-2.03066	31.9223	-1.71787	2	1.41549	FALSE	0	0
796	3-(Perfluoro-2-butyl)propane-1,2-diol		CAS_RN: 125070-38-4	OCC(O)CC(F)(F)C(F)(F)C(F)(F)C(F)(F)F	OCC(O)CC(F)(F)C(F)(F)C(F)(F)C(F)(F)F	C7H7F9O2	1.5596	965.75	3.96541	11.8933	162.816	1020.46	2.39215	8.4359	0	-6.647	-2.44229	0	1.29973	TRUE	1	0
797	multiple H-substituted, multiple ether-substituted perfluoroalkyl alcohols, n=7, m=17		NA	FC(F)(F)C(F)(F)C(F)(F)C(F)(F)C(F)(F)C(F)(F)C(F)(F)C(F)(F)C(F)(F)C(F)(F)C(F)(F)C(F)(F)C(F)(F)C(F)(F)CCOCCOCCOCCOCCOCCOCCOCCOCCOCCOCCOCCOCCOCCOCCOCCOCCO[H]	OCCOCCOCCOCCOCCOCCOCCOCCOCCOCCOCCOCCOCCOCCOCCOCCOCCC(F)(F)C(F)(F)C(F)(F)C(F)(F)C(F)(F)C(F)(F)C(F)(F)C(F)(F)C(F)(F)C(F)(F)C(F)(F)C(F)(F)C(F)(F)C(F)(F)F	C48H69F29O17	-4.9634	4312.63	23.2671	13.5044	143.289	6996.63	3.49416	8.5878	0	-96.3657	-3.08059	0	3.15095	FALSE	0	0
798	tert-Butyl (4,4,5,5,6,6,7,7,7-nonafluoro-2-iodoheptyl)carbamate		CAS_RN: 1301739-79-6	CC(C)(C)OC(=O)NCC(I)CC(F)(F)C(F)(F)C(F)(F)C(F)(F)F	CC(C)(C)OC(=O)NCC(I)CC(F)(F)C(F)(F)C(F)(F)C(F)(F)F	C12H15F9INO2	-2.4782	995.33	3.32536	12.0513	183.423	-4429.96	2.96301	0	-1.04891	25.8873	-1.90409	0	2.33535	FALSE	0	0
799	1,1,2,2,3,3,4,4-Octafluoro-1-[(1,1,1,2,3,3,3-heptafluoropropan-2-yl)oxy]-4-iodobutane		CAS_RN: 25080-17-5	FC(F)(F)C(F)(OC(F)(F)C(F)(F)C(F)(F)C(F)(F)I)C(F)(F)F	FC(F)(F)C(F)(OC(F)(F)C(F)(F)C(F)(F)C(F)(F)I)C(F)(F)F	C7F15IO	-1.897	1468.74	8.20406	12.4363	250.055	-512.24	2.72345	0	0	-59.0555	0	0	1.28991	TRUE	1	0
800	1-Heptafluorobutyryloxydecane		CAS_RN: 2994-16-3	CCCCCCCCCCOC(=O)C(F)(F)C(F)(F)C(F)(F)F	CCCCCCCCCCOC(=O)C(F)(F)C(F)(F)C(F)(F)F	C14H21F7O2	-2.8859	770.71	2.3811	11.6413	131.122	2929.67	2.84361	0	-2.85855	24.1036	-0.613769	0	2.07101	FALSE	0	0
801	Methyl difluoro[1,1,2,2-tetrafluoro-2-(nonafluorobutoxy)ethoxy]acetate		CAS_RN: 129301-40-2	COC(=O)C(F)(F)OC(F)(F)C(F)(F)OC(F)(F)C(F)(F)C(F)(F)C(F)(F)F	COC(=O)C(F)(F)OC(F)(F)C(F)(F)OC(F)(F)C(F)(F)C(F)(F)C(F)(F)F	C9H3F15O4	-4.4565	1499.88	7.23521	12.4368	208.468	322.094	2.83397	0	-3.14938	-42.5742	0	0	1.44497	FALSE	0	0
802	Perfluoroheptanesulphonyl fluoride		CAS_RN: 335-71-7	O=[S](F)(=O)C(F)(F)C(F)(F)C(F)(F)C(F)(F)C(F)(F)C(F)(F)C(F)(F)F	O=S(=O)(F)C(F)(F)C(F)(F)C(F)(F)C(F)(F)C(F)(F)C(F)(F)C(F)(F)F	C7F16O2S	-1.6334	1967.78	9.33326	12.7263	239.171	-27.8777	2.63599	0	0	-100.173	0	0	1.17393	TRUE	1	0
803	2-Iodoperfluorobutane		CAS_RN: 375-51-9	FC(F)(F)C(F)(F)C(F)(I)C(F)(F)F	FC(F)(F)C(F)(F)C(F)(I)C(F)(F)F	C4F9I	-1.1245	660.6	3.96541	11.6883	177.044	-3043.23	1.58175	0	0	-13.4673	0	0	2.02465	FALSE	0	0
804	1,1,1,2,2,3,3,4,4,5,5-Undecafluoro-5-methoxypentane		CAS_RN: 181214-74-4	COC(F)(F)C(F)(F)C(F)(F)C(F)(F)C(F)(F)F	COC(F)(F)C(F)(F)C(F)(F)C(F)(F)C(F)(F)F	C6H3F11O	-3.7717	1134.19	5.67624	12.1183	186.475	356.815	2.37448	0	0	-49.1628	0	0	1.49972	FALSE	0	0
805	2-[[(Heptadecafluorooctyl)sulfonyl]amino]-N,N,N-trimethylethanaminium iodide		CAS_RN: 57765-32-9	[I-].C[N+](C)(C)CCNS(=O)(=O)C(F)(F)C(F)(F)C(F)(F)C(F)(F)C(F)(F)C(F)(F)C(F)(F)C(F)(F)F	C[N+](C)(C)CCNS(=O)(=O)C(F)(F)C(F)(F)C(F)(F)C(F)(F)C(F)(F)C(F)(F)C(F)(F)C(F)(F)F	C13H14F17N2O2S	-2.8528	2357.1	11.2406	12.9559	183.438	2013.12	3.0796	0	0	-50.55	-1.23425	0	1.46163	FALSE	0	0
806	S-(3,3,4,4,5,5,6,6,7,7,8,8,9,9,10,10,10-Heptadecafluorodecyl) ethanethioate		CAS_RN: 125640-21-3	CC(=O)SCCC(F)(F)C(F)(F)C(F)(F)C(F)(F)C(F)(F)C(F)(F)C(F)(F)C(F)(F)F	CC(=O)SCCC(F)(F)C(F)(F)C(F)(F)C(F)(F)C(F)(F)C(F)(F)C(F)(F)C(F)(F)F	C12H7F17OS	-0.3645	2053.6	11.2406	12.7936	204.812	-183.13	2.95608	0	-0.803922	-43.723	-2.48281	0	1.12738	TRUE	1	0
807	perfluoroalkanesulfonamido quaternary ammonium disulfonate A, n=5		NA	S(N(CCCS(=O)(O)=O)CCC[N+](CCCS(=O)(O)=O)(C)C)(=O)(=O)C(F)(F)C(F)(F)C(F)(F)C(F)(F)C(F)(F)F	C[N+](C)(CCCN(CCCS(=O)(=O)O)S(=O)(=O)C(F)(F)C(F)(F)C(F)(F)C(F)(F)C(F)(F)F)CCCS(=O)(=O)O	C16H25F11N2O8S3	-1.5447	1732.85	5.67624	12.7074	154.078	1135.61	3.43803	8.8789	0	19.1863	-1.4138	2	1.29879	TRUE	1	0
808	ether-substituted Perfluoroalkyl (linear) sulfonic acids, n=6		NA	S(=O)(O)(=O)C(F)(F)C(F)(F)C(F)(F)C(F)(F)C(F)(F)C(F)(F)OC(F)(F)F	O=S(=O)(O)C(F)(F)C(F)(F)C(F)(F)C(F)(F)C(F)(F)C(F)(F)OC(F)(F)F	C7HF15O4S	-0.261	2010.9	8.50728	12.6781	231.103	61.256	2.72281	7.8287	0	-50.4354	0	1	0.571061	TRUE	1	0
809	18:2 Fluorotelomer alcohol	18:2FTOH	CAS_RN: 65104-65-6	C(C(F)(F)C(F)(F)C(F)(F)C(F)(F)C(F)(F)C(F)(F)C(F)(F)C(F)(F)C(F)(F)C(F)(F)C(F)(F)C(F)(F)C(F)(F)C(F)(F)C(F)(F)C(F)(F)C(C(F)(F)F)(F)F)CO	OCCC(F)(F)C(F)(F)C(F)(F)C(F)(F)C(F)(F)C(F)(F)C(F)(F)C(F)(F)C(F)(F)C(F)(F)C(F)(F)C(F)(F)C(F)(F)C(F)(F)C(F)(F)C(F)(F)C(F)(F)C(F)(F)F	C20H5F37O	0.3966	5083.38	31.5895	13.7106	231.042	1528.46	3.49691	8.0406	0	-204.415	-3.36796	0	1.58341	FALSE	0	0
810	Perfluoro-5,5'-bis(trifluoromethyl)-1,1'-bicyclohexyl		CAS_RN: 105462-77-9	FC(F)(F)C1(F)C(F)(F)C(F)(F)C(F)(F)C(F)(C1(F)F)C1(F)C(F)(F)C(F)(F)C(F)(F)C(F)(C(F)(F)F)C1(F)F	FC(F)(F)C1(F)C(F)(F)C(F)(F)C(F)(F)C(F)(C2(F)C(F)(F)C(F)(F)C(F)(F)C(F)(C(F)(F)F)C2(F)F)C1(F)F	C14F26	0.5452	4885.88	32.222	13.9034	243.631	-195.173	3.14892	0	0	-45.9515	0	0	1.53797	FALSE	0	0
811	Octafluoroadipoyl difluoride		CAS_RN: 37881-62-2	O=C(F)C(F)(F)C(F)(F)C(F)(F)C(F)(F)C(=O)F	O=C(F)C(F)(F)C(F)(F)C(F)(F)C(F)(F)C(=O)F	C6F10O2	-1.2956	1127	3.96541	12.0579	231.963	7.64868	2.36021	0	-4.35252	-82.2355	0	0	1.3119	TRUE	1	0
812	1-[Chloro(difluoro)methoxy]-1,1,2,2-tetrafluoro-2-(trifluoromethoxy)ethane		CAS_RN: 87136-79-6	FC(F)(F)OC(F)(F)C(F)(F)OC(F)(F)Cl	FC(F)(F)OC(F)(F)C(F)(F)OC(F)(F)Cl	C4ClF9O2	-5.1624	761.96	2.52506	11.4376	215.803	-91.8615	1.58175	0	0	-0.1458	0	0	1.85919	FALSE	0	0
813	1H,1H-Perfluorohexylamine		CAS_RN: 355-34-0	NCC(F)(F)C(F)(F)C(F)(F)C(F)(F)C(F)(F)F	NCC(F)(F)C(F)(F)C(F)(F)C(F)(F)C(F)(F)F	C6H4F11N	1.9221	1151.44	5.67624	12.1183	178.766	849.923	2.36496	0	0	-51.5579	-2.53817	0	1.37701	FALSE	0	0
814	6,6,7,7,8,8,9,9,9-Nonafluoro-2,2-dimethylnon-4-en-3-one		CAS_RN: 105602-69-5	CC(C)(C)C(=O)C=CC(F)(F)C(F)(F)C(F)(F)C(F)(F)F	CC(C)(C)C(=O)C=CC(F)(F)C(F)(F)C(F)(F)C(F)(F)F	C11H11F9O	-1.7602	966.81	3.9779	11.9974	175.388	690.784	2.45629	0	-1.14509	29.6258	0	0	1.45752	FALSE	0	0
815	Butyl heptadecafluorononanoate		CAS_RN: 117374-31-9	CCCCOC(=O)C(F)(F)C(F)(F)C(F)(F)C(F)(F)C(F)(F)C(F)(F)C(F)(F)C(F)(F)F	CCCCOC(=O)C(F)(F)C(F)(F)C(F)(F)C(F)(F)C(F)(F)C(F)(F)C(F)(F)C(F)(F)F	C13H9F17O2	-2.0555	2183.21	11.2406	12.8424	208.074	3077.62	2.98859	0	-3.73415	-54.6692	-1.22718	0	1.58517	FALSE	0	0
816	n:2 fluorotelomer thio alkyl amido ammonium, n=4		NA	FC(F)(F)C(F)(F)C(F)(F)C(F)(F)C(F)(F)C(F)(F)C(F)(F)C(F)(F)CCSCC(NCCCN(C)C)=O	CN(C)CCCNC(=O)CSCCC(F)(F)C(F)(F)C(F)(F)C(F)(F)C(F)(F)C(F)(F)C(F)(F)C(F)(F)F	C17H19F17N2OS	-1.7569	2151.84	11.2406	12.8238	176.225	2392.54	3.27975	0	-0.749644	-24.9568	-2.43288	0	1.5368	FALSE	0	0
817	1,1,1,2,2,3,3,4,4,5,5,6,6--Tridecafluorohexadecane		CAS_RN: 147492-59-9	CCCCCCCCCCC(F)(F)C(F)(F)C(F)(F)C(F)(F)C(F)(F)C(F)(F)F	CCCCCCCCCCC(F)(F)C(F)(F)C(F)(F)C(F)(F)C(F)(F)C(F)(F)F	C16H21F13	-1.3699	1528.88	7.47342	12.4379	148.73	4170.67	3.01515	0	0	8.7778	-2.0851	0	2.12874	FALSE	0	0
818	3-[(3,3,4,4,5,5,6,6,7,7,8,8,8-Tridecafluorooctyl)thio]propanoic acid lithium salt		CAS_RN: 433333-62-1	[Li+].[O-]C(=O)CCSCCC(F)(F)C(F)(F)C(F)(F)C(F)(F)C(F)(F)C(F)(F)F	O=C(O)CCSCCC(F)(F)C(F)(F)C(F)(F)C(F)(F)C(F)(F)C(F)(F)F	C11H9F13O2S	0.8921	1477.61	7.47342	12.4369	187.363	554.628	2.88884	8.2606	-1.37023	-7.5182	-2.19416	1	0.733101	TRUE	1	0
819	Lithium nonafluorobutane-1-sulfonate		CAS_RN: 131651-65-5	[Li+].[O-]S(=O)(=O)C(F)(F)C(F)(F)C(F)(F)C(F)(F)F	O=S(=O)(O)C(F)(F)C(F)(F)C(F)(F)C(F)(F)F	C4HF9O3S	1.33	1057.84	3.96541	12.0588	208.718	93.8905	1.8131	7.6998	0	-39.3717	0	1	0.9201	TRUE	1	0
820	33,33,34,34,35,35,36,36,37,37,38,38,39,39,40,40,41,41,42,42,43,43,44,44,44-pentacosafluoro-2,5,8,11,14,17,20,23,26-decaoxatetratetracontan-31-ol (English, Spanish) (EINECS)		CAS_RN: 93776-06-8	COCCOCCOCCOCCOCCOCCOCCOCCOCCOCC(O)CC(F)(F)C(F)(F)C(F)(F)C(F)(F)C(F)(F)C(F)(F)C(F)(F)C(F)(F)C(F)(F)C(F)(F)C(F)(F)C(F)(F)F	COCCOCCOCCOCCOCCOCCOCCOCCOCCOCC(O)CC(F)(F)C(F)(F)C(F)(F)C(F)(F)C(F)(F)C(F)(F)C(F)(F)C(F)(F)C(F)(F)C(F)(F)C(F)(F)C(F)(F)F	C34H45F25O11	-4.3294	3611.29	19.1782	13.3285	152.092	5113.65	3.47356	9.473	0	-74.5146	-3.31018	0	2.46993	FALSE	0	0
821	[[4-[(Heptadecafluorononenyl)oxy]phenyl]methyl]phosphonic acid, monosodium salt		CAS_RN: 63661-51-8	[Na+].OP([O-])(=O)CC1=CC=C(OC(F)=C(F)C(F)(F)C(F)(F)C(F)(F)C(F)(F)C(F)(F)C(F)(F)C(F)(F)F)C=C1	O=P(O)(O)Cc1ccc(OC(F)=C(F)C(F)(F)C(F)(F)C(F)(F)C(F)(F)C(F)(F)C(F)(F)C(F)(F)F)cc1	C16H8F17O4P	1.6013	2167.18	9.33326	12.8646	218.495	855.998	3.24215	8.8549	-4.51875	-12.2255	-0.871019	2	0.901207	TRUE	1	0
822	Ammonium 2,2,3,3,4,4,5,5,6,7,7,7-dodecafluoro-6-(trifluoromethyl)heptanoate		CAS_RN: 19742-57-5	[NH4+].[O-]C(=O)C(F)(F)C(F)(F)C(F)(F)C(F)(F)C(F)(C(F)(F)F)C(F)(F)F	O=C(O)C(F)(F)C(F)(F)C(F)(F)C(F)(F)C(F)(C(F)(F)F)C(F)(F)F	C8HF15O2	1.2039	2428.94	9.83452	12.709	227.027	-25.7484	2.6122	7.5821	-4.30884	-47.306	0	1	0.633718	TRUE	1	0
823	Perfluorohexanesulfinate zinc salt		CAS_RN: 86525-30-6	[Zn++].[O-]S(=O)C(F)(F)C(F)(F)C(F)(F)C(F)(F)C(F)(F)C(F)(F)F.[O-]S(=O)C(F)(F)C(F)(F)C(F)(F)C(F)(F)C(F)(F)C(F)(F)F	O=S(O)C(F)(F)C(F)(F)C(F)(F)C(F)(F)C(F)(F)C(F)(F)F	C6HF13O2S	1.1883	1534.08	7.47342	12.446	226.969	82.2409	2.48727	7.8593	0	-73.1909	0	1	0.60943	TRUE	1	0
824	multiple H-substituted, multiple ether-substituted perfluoroalkyl alcohols, n=7, m=20		NA	FC(F)(F)C(F)(F)C(F)(F)C(F)(F)C(F)(F)C(F)(F)C(F)(F)C(F)(F)C(F)(F)C(F)(F)C(F)(F)C(F)(F)C(F)(F)C(F)(F)CCOCCOCCOCCOCCOCCOCCOCCOCCOCCOCCOCCOCCOCCOCCOCCOCCOCCOCCOCCO[H]	OCCOCCOCCOCCOCCOCCOCCOCCOCCOCCOCCOCCOCCOCCOCCOCCOCCOCCOCCOCCC(F)(F)C(F)(F)C(F)(F)C(F)(F)C(F)(F)C(F)(F)C(F)(F)C(F)(F)C(F)(F)C(F)(F)C(F)(F)C(F)(F)C(F)(F)C(F)(F)F	C54H81F29O20	-5.2849	4398.88	23.2671	13.5169	139.186	7220.77	3.49674	8.5979	0	-95.8564	-3.08218	0	3.25987	FALSE	0	0
825	Hexyl 2,3,3,3-tetrafluoro-2-(heptafluoropropoxy)propanoate		CAS_RN: 183873-57-6	CCCCCCOC(=O)C(F)(OC(F)(F)C(F)(F)C(F)(F)F)C(F)(F)F	CCCCCCOC(=O)C(F)(OC(F)(F)C(F)(F)C(F)(F)F)C(F)(F)F	C12H13F11O3	-3.8002	1082.83	4.5088	12.1439	178.705	3142.23	2.97509	0	-3.22301	47.2031	-0.925418	0	1.93776	FALSE	0	0
826	Phosphonic acid, [3-[ethyl[(pentadecafluoroheptyl)sulfonyl]amino]propyl]-		CAS_RN: 71463-79-1	C(N([S](=O)(=O)C(F)(F)C(F)(F)C(F)(F)C(F)(F)C(F)(F)C(F)(F)C(F)(F)F)CCC[P](=O)(O)O)C	CCN(CCCP(=O)(O)O)S(=O)(=O)C(F)(F)C(F)(F)C(F)(F)C(F)(F)C(F)(F)C(F)(F)C(F)(F)F	C12H13F15NO5PS	0.1301	2140.01	9.33326	12.8941	181.777	1438.26	3.21894	8.7062	0	-32.6561	-1.47285	2	0.972313	TRUE	1	0
827	(5E)-1,1,1,2,2,3,3,4,4,7,7,8,8,9,9,10,10,11,11,12,12,13,13,14,14,14-Hexacosafluorotetradec-5-ene		CAS_RN: 51249-69-5	FC(F)(F)C(F)(F)C(F)(F)C(F)(F)C=CC(F)(F)C(F)(F)C(F)(F)C(F)(F)C(F)(F)C(F)(F)C(F)(F)C(F)(F)F	FC(F)(F)C(F)(F)C(F)(F)C(F)(F)C=CC(F)(F)C(F)(F)C(F)(F)C(F)(F)C(F)(F)C(F)(F)C(F)(F)C(F)(F)F	C14H2F26	-0.6639	2820.38	16.1929	13.1199	228.041	352.52	3.1918	0	0	-113.948	0	0	1.11757	TRUE	1	0
828	H-substituted Perfluoroalkyl (linear) carboxylic acids_i, n=3		NA	C(O)(=O)C(F)C(F)(F)C(F)(F)C(F)(F)F	O=C(O)C(F)C(F)(F)C(F)(F)C(F)(F)F	C5H2F8O2	1.1876	834.5	2.3811	11.6237	179.258	35.5066	1.73278	7.591	-3.10748	-31.8732	0	1	1.12136	TRUE	1	0
829	(3,3,4,4,5,5,6,6,6-Nonafluorohexyl)phosphonic acid		CAS_RN: 503564-50-9	OP(O)(=O)CCC(F)(F)C(F)(F)C(F)(F)C(F)(F)F	O=P(O)(O)CCC(F)(F)C(F)(F)C(F)(F)C(F)(F)F	C6H6F9O3P	2.5512	885.88	3.96541	11.9286	178.489	-25.1412	2.35095	8.256	0	-3.6378	-2.47693	2	1.24333	TRUE	1	0
830	Ethyl 3,3,4,4,5,5,6,6,6-nonafluoro-2-methylidenehexanoate		CAS_RN: 117374-41-1	CCOC(=O)C(=C)C(F)(F)C(F)(F)C(F)(F)C(F)(F)F	C=C(C(=O)OCC)C(F)(F)C(F)(F)C(F)(F)C(F)(F)F	C9H7F9O2	-3.2757	1081.92	3.96541	12.0559	200.853	1304.26	2.52347	0	-2.50623	-2.9523	-0.602015	0	1.4589	FALSE	0	0
831	(Tridecafluorohexyl)phosphonic acid--4-methylaniline (1/1)		CAS_RN: 1263361-02-9	Cc1ccc(N)cc1.OP(O)(=O)C(F)(F)C(F)(F)C(F)(F)C(F)(F)C(F)(F)C(F)(F)F	O=P(O)(O)C(F)(F)C(F)(F)C(F)(F)C(F)(F)C(F)(F)C(F)(F)F	C6H2F13O3P	3.195	1653.75	7.47342	12.5486	217.338	191.86	2.49206	7.8894	0	-64.4866	0	2	0.904311	TRUE	1	0
832	1,1,1,2,2,3,3,4,4,5,5,6,6,7,7,8,8,9,9,10,10-Henicosafluoro-12-iodotriacontane		CAS_RN: 1257261-89-4	CCCCCCCCCCCCCCCCCCC(I)CC(F)(F)C(F)(F)C(F)(F)C(F)(F)C(F)(F)C(F)(F)C(F)(F)C(F)(F)C(F)(F)C(F)(F)F	CCCCCCCCCCCCCCCCCCC(I)CC(F)(F)C(F)(F)C(F)(F)C(F)(F)C(F)(F)C(F)(F)C(F)(F)C(F)(F)C(F)(F)C(F)(F)F	C30H40F21I	-0.7129	2838.68	15.1596	13.1074	158.451	4424.74	3.49428	0	0	8.9929	-2.40712	0	2.16046	FALSE	0	0
833	1-Propanaminium, 3-[[(heptadecafluorooctyl)sulfonyl]amino]-N,N,N-trimethyl-, sulfate (2:1) (TSCA, NDSL, ENCS)		CAS_RN: 70225-26-2	C(N[S](=O)(=O)C(F)(F)C(F)(F)C(F)(F)C(F)(F)C(F)(F)C(F)(F)C(F)(F)C(F)(F)F)CC[N+](C)(C)C.C(N[S](=O)(=O)C(F)(F)C(F)(F)C(F)(F)C(F)(F)C(F)(F)C(F)(F)C(F)(F)C(F)(F)F)CC[N+](C)(C)C.O=[S]([O-])([O-])=O	C[N+](C)(C)CCCNS(=O)(=O)C(F)(F)C(F)(F)C(F)(F)C(F)(F)C(F)(F)C(F)(F)C(F)(F)C(F)(F)F	C14H16F17N2O2S	-2.7741	2366.85	11.2406	12.9559	178.852	2554.7	3.12176	0	0	-40.8944	-1.2005	0	1.58445	FALSE	0	0
834	N-ethyl-1,1,2,2,3,3,4,4,5,5,6,6,7,7,7-pentadecafluoro-N-[3-(trichlorosilyl)propyl]heptane-1-sulphonamide		CAS_RN: 67584-50-3	O=S(=O)(N(CC)CCC[Si](Cl)(Cl)Cl)C(F)(F)C(F)(F)C(F)(F)C(F)(F)C(F)(F)C(F)(F)C(F)(F)F	CCN(CCC[Si](Cl)(Cl)Cl)S(=O)(=O)C(F)(F)C(F)(F)C(F)(F)C(F)(F)C(F)(F)C(F)(F)C(F)(F)F	C12H11Cl3F15NO2SSi	7.2615	2079.59	9.33326	12.8941	198.48	-0.480778	3.23345	0	0	-24.9099	-1.01807	0	1.67462	FALSE	0	0
835	(3Z)-4,5,5,6,6,7,7,8,8,9,9,10,10,11,11,11-Hexadecafluoroundec-3-en-2-one		CAS_RN: 136909-85-8	CC(=O)C=C(/F)C(F)(F)C(F)(F)C(F)(F)C(F)(F)C(F)(F)C(F)(F)C(F)(F)F	CC(=O)C=C(F)C(F)(F)C(F)(F)C(F)(F)C(F)(F)C(F)(F)C(F)(F)C(F)(F)F	C11H4F16O	-1.0465	1921.19	9.33326	12.694	227.17	372.531	2.79165	0	-3.88299	-67.8243	0	0	1.12354	TRUE	1	0
836	2-Chloro-5-(1,1,1,2,3,3,3-heptafluoropropan-2-yl)pyridine		CAS_RN: 1807450-20-9	FC(F)(F)C(F)(c1ccc(Cl)nc1)C(F)(F)F	FC(F)(F)C(F)(c1ccc(Cl)nc1)C(F)(F)F	C8H3ClF7N	-1.2333	857.77	2.3811	11.8624	178.002	26.2518	2.38098	0	0	58.5431	0	0	1.55061	FALSE	0	0
837	2,3,3,4,4,5,5,5-Octafluoro-2-(1,1,1,2,3,3,3-heptafluoropropan-2-yl)pentanoic acid		CAS_RN: 1882109-76-3	OC(=O)C(F)(C(F)(F)C(F)(F)C(F)(F)F)C(F)(C(F)(F)F)C(F)(F)F	O=C(O)C(F)(C(F)(F)C(F)(F)C(F)(F)F)C(F)(C(F)(F)F)C(F)(F)F	C8HF15O2	1.2039	2254.69	9.83452	12.7703	213.596	6.46664	2.59233	7.8638	-4.9041	-9.3296	0	1	0.793073	TRUE	1	0
838	12:2 Fluorotelomer phosphate diester		CAS_RN: 1895-26-7	C(C(C(C(C(C(C(C(C(C(C(F)(F)F)(F)F)(F)F)(F)F)(F)F)(F)F)(F)F)(F)F)(F)F)(F)F)CO[P](=O)(OCCC(C(C(C(C(C(C(C(C(C(F)(F)F)(F)F)(F)F)(F)F)(F)F)(F)F)(F)F)(F)F)(F)F)(F)F)O	O=P(O)(OCCC(F)(F)C(F)(F)C(F)(F)C(F)(F)C(F)(F)C(F)(F)C(F)(F)C(F)(F)C(F)(F)C(F)(F)F)OCCC(F)(F)C(F)(F)C(F)(F)C(F)(F)C(F)(F)C(F)(F)C(F)(F)C(F)(F)C(F)(F)C(F)(F)F	C24H9F42O4P	-0.8893	5435.78	0	13.7687	215.621	844.189	3.65213	9.1396	0	-178.897	-3.95447	1	1.46531	FALSE	0	0
839	multiple H-substituted perfluoroalkyl sulfates n=3		NA	O=S(O)(=O)OCC(F)(F)CC(F)(F)CC(F)(F)[H]	O=S(=O)(O)OCC(F)(F)CC(F)(F)CC(F)F	C6H8F6O4S	-2.3944	704.63	0.5	11.0811	161.278	-1849.24	1.92365	8.082	0	-11.5493	-2.28199	1	1.7306	FALSE	0	0
840	4-(1,1,1,2,3,3,3-Heptafluoropropan-2-yl)-2-methyl-1-nitrobenzene		CAS_RN: 238098-38-9	Cc1cc(ccc1[N+]([O-])=O)C(F)(C(F)(F)F)C(F)(F)F	Cc1cc(C(F)(C(F)(F)F)C(F)(F)F)ccc1[N+](=O)[O-]	C10H6F7NO2	-0.0746	971.33	2.3811	12.048	164.835	398.261	2.53323	0	0	80.1783	0	0	1.58086	FALSE	0	0
841	1H,2H-Hexafluorocyclopentene		CAS_RN: 1005-73-8	FC1(F)C=CC(F)(F)C1(F)F	FC1(F)C=CC(F)(F)C1(F)F	C5H2F6	0	320	2.3811	11.6047	0	98.2015	1.58175	0	0	-25.0672	0	0	2.95618	FALSE	0	0
842	4-(4-Methoxyphenyl)-2-methyl-5-(1,1,2,2,3,3,4,4,5,5,6,6,6-tridecafluorohexane-1-sulfonyl)-1,2-oxazolidine		CAS_RN: 93416-31-0	COc1ccc(cc1)C1CN(C)OC1S(=O)(=O)C(F)(F)C(F)(F)C(F)(F)C(F)(F)C(F)(F)C(F)(F)F	COc1ccc(C2CN(C)OC2S(=O)(=O)C(F)(F)C(F)(F)C(F)(F)C(F)(F)C(F)(F)C(F)(F)F)cc1	C17H14F13NO4S	-0.7734	1884.53	7.47342	12.9648	191.925	1564.14	3.12869	0	0	24.6969	-0.633028	0	1.33854	TRUE	1	0
843	4-Pyridinecarboxamide, N-[4-(nonafluorobutoxy)phenyl]-		CAS_RN: 62315-14-4	FC(F)(F)C(F)(F)C(F)(F)C(F)(F)OC1=CC=C(NC(=O)C2=CC=NC=C2)C=C1	O=C(Nc1ccc(OC(F)(F)C(F)(F)C(F)(F)C(F)(F)F)cc1)c1ccncc1	C16H9F9N2O2	-0.3274	1024.29	3.96541	12.2422	208.388	1020.82	2.88045	0	-0.650231	46.5781	0	0	1.33736	TRUE	1	0
844	perfluoroalkanesulfonamido quaternary ammonium disulfonate A, n=8		NA	S(N(CCCS(=O)(O)=O)CCC[N+](CCCS(=O)(O)=O)(C)C)(=O)(=O)C(F)(F)C(F)(F)C(F)(F)C(F)(F)C(F)(F)C(F)(F)C(F)(F)C(F)(F)F	C[N+](C)(CCCN(CCCS(=O)(=O)O)S(=O)(=O)C(F)(F)C(F)(F)C(F)(F)C(F)(F)C(F)(F)C(F)(F)C(F)(F)C(F)(F)F)CCCS(=O)(=O)O	C19H25F17N2O8S3	-1.2739	2625.54	11.2406	13.1115	165.433	2046.13	3.64613	8.8916	0	-7.8735	-1.69875	2	1.31812	TRUE	1	0
845	10:2 Fluorotelomer acrylate		CAS_RN: 17741-60-5	FC(F)(F)C(F)(F)C(F)(F)C(F)(F)C(F)(F)C(F)(F)C(F)(F)C(F)(F)C(F)(F)C(F)(F)CCOC(=O)C=C	C=CC(=O)OCCC(F)(F)C(F)(F)C(F)(F)C(F)(F)C(F)(F)C(F)(F)C(F)(F)C(F)(F)C(F)(F)C(F)(F)F	C15H7F21O2	-1.6142	2720.42	15.1596	13.0645	215.447	1497.87	3.16505	0	-1.77204	-88.5064	-3.01463	0	1.28868	TRUE	1	0
846	1,1,1,3,4,4,4-Heptafluoro-3-(heptafluoropropoxy)-2-(trifluoromethyl)butan-2-yl prop-2-enoate		CAS_RN: 1622868-66-9	FC(F)(F)C(F)(F)C(F)(F)OC(F)(C(F)(F)F)C(OC(=O)C=C)(C(F)(F)F)C(F)(F)F	C=CC(=O)OC(C(F)(F)F)(C(F)(F)F)C(F)(OC(F)(F)C(F)(F)C(F)(F)F)C(F)(F)F	C11H3F17O3	-2.8584	2201.19	10.8269	12.8548	242.42	466.541	3.17725	0	-3.25424	52.4127	0	0	1.4019	FALSE	0	0
847	3-(Butane-2-sulfinyl)-2-ethyl-4-(1,1,1,2,3,3,3-heptafluoropropan-2-yl)benzoic acid		CAS_RN: 1355555-01-9	CCC(C)S(=O)c1c(CC)c(ccc1C(F)(C(F)(F)F)C(F)(F)F)C(O)=O	CCc1c(C(=O)O)ccc(C(F)(C(F)(F)F)C(F)(F)F)c1S(=O)C(C)CC	C16H17F7O3S	1.7902	1093.37	2.3811	12.4425	200.191	1120.43	3.08031	9.197	-1.60332	111.207	-0.299055	1	1.163	TRUE	1	0
848	1,1,1,2,2,3,3,4,4,5,5,6,6-Tridecafluoroicos-7-ene		CAS_RN: 160460-04-8	CCCCCCCCCCCCC=CC(F)(F)C(F)(F)C(F)(F)C(F)(F)C(F)(F)C(F)(F)F	CCCCCCCCCCCCC=CC(F)(F)C(F)(F)C(F)(F)C(F)(F)C(F)(F)C(F)(F)F	C20H27F13	-1.1755	1557.13	7.47342	12.454	145.734	4716.91	3.2	0	0	15.3419	-0.3444	0	2.28257	FALSE	0	0
849	Bis(heptadecafluorooctyl) 2-methylidenebutanedioate		CAS_RN: 243977-25-5	FC(F)(F)C(F)(F)C(F)(F)C(F)(F)C(F)(F)C(F)(F)C(F)(F)C(F)(F)OC(=O)CC(=C)C(=O)OC(F)(F)C(F)(F)C(F)(F)C(F)(F)C(F)(F)C(F)(F)C(F)(F)C(F)(F)F	C=C(CC(=O)OC(F)(F)C(F)(F)C(F)(F)C(F)(F)C(F)(F)C(F)(F)C(F)(F)C(F)(F)F)C(=O)OC(F)(F)C(F)(F)C(F)(F)C(F)(F)C(F)(F)C(F)(F)C(F)(F)C(F)(F)F	C21H4F34O4	-1.4388	4360.92	19.4802	13.5258	236.706	654.807	3.52498	0	-4.02237	-119.151	-3.30206	0	1.48265	FALSE	0	0
850	2,2,3,4,4,4-Hexafluoro-3-(trifluoromethyl)butan-1-ol		CAS_RN: 782390-93-6	OCC(F)(F)C(F)(C(F)(F)F)C(F)(F)F	OCC(F)(F)C(F)(C(F)(F)F)C(F)(F)F	C5H3F9O	0.4911	1517.25	4.24264	11.88	112.774	211.475	1.58175	7.6663	0	0.7718	-2.91417	0	1.74978	FALSE	0	0
851	Perfluoro-1-octanesulfonyl chloride		CAS_RN: 423-60-9	FC(F)(F)C(F)(F)C(F)(F)C(F)(F)C(F)(F)C(F)(F)C(F)(F)C(F)(F)S(Cl)(=O)=O	O=S(=O)(Cl)C(F)(F)C(F)(F)C(F)(F)C(F)(F)C(F)(F)C(F)(F)C(F)(F)C(F)(F)F	C8ClF17O2S	-0.2266	2150.55	11.2406	12.8772	248.541	-55.9358	2.81479	0	0	-94.9778	0	0	1.12263	TRUE	1	0
852	1,1,1,2,2,3,3,4,4,5,5,6,6,7,7,8,8,9,9,10,10-Henicosafluoro-12-iododocosane		CAS_RN: 129838-43-3	CCCCCCCCCCC(I)CC(F)(F)C(F)(F)C(F)(F)C(F)(F)C(F)(F)C(F)(F)C(F)(F)C(F)(F)C(F)(F)C(F)(F)F	CCCCCCCCCCC(I)CC(F)(F)C(F)(F)C(F)(F)C(F)(F)C(F)(F)C(F)(F)C(F)(F)C(F)(F)C(F)(F)C(F)(F)F	C22H24F21I	-0.8099	2740.68	15.1596	13.0906	178.065	1576.87	3.42111	0	0	-6.4018	-2.40934	0	1.41419	FALSE	0	0
853	(2-Naphthalenyl)perfluorobutanamide		CAS_RN: 582-00-3	FC(F)(F)C(F)(F)C(F)(F)C(=O)NC1=CC2=CC=CC=C2C=C1	O=C(Nc1ccc2ccccc2c1)C(F)(F)C(F)(F)C(F)(F)F	C14H8F7NO	1.5846	755.99	2.3811	12.0289	192.514	939.717	2.794	0	-2.74064	51.5567	0	0	1.41261	FALSE	0	0
854	Perfluorotetralin		CAS_RN: 2342-07-6	FC1=C(F)C2=C(C(F)=C1F)C(F)(F)C(F)(F)C(F)(F)C2(F)F	Fc1c(F)c(F)c2c(c1F)C(F)(F)C(F)(F)C(F)(F)C2(F)F	C10F12	0.6844	1275.17	3.96541	12.7781	237.45	-37.5257	2.43199	0	0	-36.4071	0	0	1.19113	TRUE	1	0
855	1,2,3,4-Tetrafluoro-5-(1,1,1,2,3,3,3-heptafluoropropan-2-yl)-6-(trifluoromethyl)benzene		CAS_RN: 112754-12-8	Fc1c(F)c(F)c(c(c1F)C(F)(F)F)C(F)(C(F)(F)F)C(F)(F)F	Fc1c(F)c(F)c(C(F)(C(F)(F)F)C(F)(F)F)c(C(F)(F)F)c1F	C10F14	0	1395.63	2.80397	12.5334	247.11	-80.3558	2.69561	0	0	42.7235	0	0	1.33865	TRUE	1	0
856	1,3-Bis[(6H-perfluorohexyl)methoxy]-2-propanol hydrogen sulfate sodium		CAS_RN: 61119-62-8	[Na+].[O-]S(=O)(=O)OC(COCC(F)(F)C(F)(F)C(F)(F)C(F)(F)C(F)(F)C(F)F)COCC(F)(F)C(F)(F)C(F)(F)C(F)(F)C(F)(F)C(F)F	O=S(=O)(O)OC(COCC(F)(F)C(F)(F)C(F)(F)C(F)(F)C(F)(F)C(F)F)COCC(F)(F)C(F)(F)C(F)(F)C(F)(F)C(F)(F)C(F)F	C17H12F24O6S	-2.0413	2779.69	8.86805	13.0572	185.525	571.267	3.41217	8.6206	0	-115.111	-3.50622	1	1.08583	TRUE	1	0
857	(2E)-4,4,5,5,6,6,6-Heptafluorohex-2-en-1-ol		CAS_RN: 37759-88-9	OCC=CC(F)(F)C(F)(F)C(F)(F)F	OCC=CC(F)(F)C(F)(F)C(F)(F)F	C6H5F7O	-0.0432	547.88	2.3811	11.3638	158.458	898.111	1.58175	7.9518	0	-1.0056	-1.05206	0	1.49239	FALSE	0	0
858	4,4,5,5,6,6,6-Heptafluorohex-2-en-1-ol		CAS_RN: 679-03-8	OCC=CC(F)(F)C(F)(F)C(F)(F)F	OCC=CC(F)(F)C(F)(F)C(F)(F)F	C6H5F7O	-0.0432	547.88	2.3811	11.3638	158.458	898.111	1.58175	7.9518	0	-1.0056	-1.05206	0	1.49239	FALSE	0	0
859	multiple H-substituted, multiple ether-substituted perfluoroalkyl alcohols, n=3, m=11		NA	FC(F)(F)C(F)(F)C(F)(F)C(F)(F)C(F)(F)C(F)(F)CCOCCOCCOCCOCCOCCOCCOCCOCCOCCOCCO[H]	OCCOCCOCCOCCOCCOCCOCCOCCOCCOCCOCCC(F)(F)C(F)(F)C(F)(F)C(F)(F)C(F)(F)C(F)(F)F	C28H45F13O11	-5.6378	1759.63	7.47342	12.5272	128.364	2877.18	3.39493	8.548	0	-19.5336	-2.42862	0	2.07609	FALSE	0	0
860	Perfluoroalkyl (linear) dicarboxylic acids, n=15		NA	FC(C(O)=O)(C(F)(F)C(F)(F)C(F)(F)C(F)(F)C(F)(F)C(F)(F)C(F)(F)C(F)(F)C(F)(F)C(F)(F)C(F)(F)C(F)(F)C(F)(F)C(F)(F)C(O)=O)F	O=C(O)C(F)(F)C(F)(F)C(F)(F)C(F)(F)C(F)(F)C(F)(F)C(F)(F)C(F)(F)C(F)(F)C(F)(F)C(F)(F)C(F)(F)C(F)(F)C(F)(F)C(F)(F)C(=O)O	C17H2F30O4	1.7245	4365.69	25.332	13.5605	238.309	195.282	3.39779	7.6683	-4.81524	-208.534	0	2	1.29228	TRUE	1	0
861	n:2 fluorotelomer betaine, n=5		NA	C[N+](CC(O)=O)(C)CCC(F)(F)C(F)(F)C(F)(F)C(F)(F)C(F)(F)C(F)(F)C(F)(F)C(F)(F)C(F)(F)C(F)(F)F	C[N+](C)(CCC(F)(F)C(F)(F)C(F)(F)C(F)(F)C(F)(F)C(F)(F)C(F)(F)C(F)(F)C(F)(F)C(F)(F)F)CC(=O)O	C16H12F21NO2	-1.9689	2779.71	15.1596	13.1089	182.964	1726.77	3.20921	8.5091	-1.86792	-67.9123	-2.84727	1	1.03798	TRUE	1	0
862	N-methyl perfluoroalkanesulfonamido quaternary ammonium, n=2		NA	S(N(C)CCC[N+](C)(C)C)(=O)(=O)C(F)(F)C(F)(F)F	CN(CCC[N+](C)(C)C)S(=O)(=O)C(F)(F)C(F)(F)F	C9H18F5N2O2S	-7.1736	655.63	1	11.6856	124.933	512.305	2.58594	0	0	47.1433	-0.333439	0	2.32258	FALSE	0	0
863	Bis(Perfluorooctylsulfonyl)amine		CAS_RN: 39847-41-1	FC(F)(F)C(F)(F)C(F)(F)C(F)(F)C(F)(F)C(F)(F)C(F)(F)C(F)(F)S(=O)(=O)NS(=O)(=O)C(F)(F)C(F)(F)C(F)(F)C(F)(F)C(F)(F)C(F)(F)C(F)(F)C(F)(F)F	O=S(=O)(NS(=O)(=O)C(F)(F)C(F)(F)C(F)(F)C(F)(F)C(F)(F)C(F)(F)C(F)(F)C(F)(F)F)C(F)(F)C(F)(F)C(F)(F)C(F)(F)C(F)(F)C(F)(F)C(F)(F)C(F)(F)F	C16HF34NO4S2	-0.2404	4619.17	22.3944	13.6421	244.542	-15.1111	3.70316	0	0	-168.349	0	0	1.4286	FALSE	0	0
864	Ammonium N,N-bis(perfluorobutanesulfonyl)amide		CAS_RN: 129318-48-5	[NH4+].FC(F)(F)C(F)(F)C(F)(F)C(F)(F)S(=O)(=O)[N-]S(=O)(=O)C(F)(F)C(F)(F)C(F)(F)C(F)(F)F	O=S(=O)(NS(=O)(=O)C(F)(F)C(F)(F)C(F)(F)C(F)(F)F)C(F)(F)C(F)(F)C(F)(F)C(F)(F)F	C8HF18NO4S2	-0.413	2238.67	7.83266	12.9065	240.527	-29.4115	3.22636	0	0	-62.2007	0	0	1.13253	TRUE	1	0
865	2,4-Difluoro-6-(1,1,1,2,3,3,3-heptafluoropropan-2-yl)-1,3,5-triazine		CAS_RN: 10271-35-9	Fc1nc(F)nc(n1)C(F)(C(F)(F)F)C(F)(F)F	Fc1nc(F)nc(C(F)(C(F)(F)F)C(F)(F)F)n1	C6F9N3	-3.7084	1034.75	2.3811	11.9603	265.947	-66.8356	2.1115	0	0	34.0884	0	0	1.69581	FALSE	0	0
866	2,2,3,3,4,5,5,6,6,6-Decafluoro-4-(pentafluoroethyl)hexanoic acid		CAS_RN: 1882109-79-6	OC(=O)C(F)(F)C(F)(F)C(F)(C(F)(F)C(F)(F)F)C(F)(F)C(F)(F)F	O=C(O)C(F)(F)C(F)(F)C(F)(C(F)(F)C(F)(F)F)C(F)(F)C(F)(F)F	C8HF15O2	1.2039	1823.69	10.3248	12.7584	219.912	71.8992	2.65965	7.6283	-4.44864	-47.306	0	1	0.653445	TRUE	1	0
867	N,N'-bis(Perfluorobutanoyl)1,3-propanediamine		CAS_RN: 149981-59-9	FC(F)(F)C(F)(F)C(F)(F)C(=O)NCCCNC(=O)C(F)(F)C(F)(F)C(F)(F)F	O=C(NCCCNC(=O)C(F)(F)C(F)(F)C(F)(F)F)C(F)(F)C(F)(F)C(F)(F)F	C11H8F14N2O2	-0.695	1358.67	3.4492	12.2753	174.572	2430.13	2.90368	0	-3.1527	-13.5794	-1.27393	0	1.5288	FALSE	0	0
868	N-(1,1,2,2,3,3,4,4,4-Nonafluorobutane-1-sulfonyl)cyclopentanecarboxamide		CAS_RN: 1440968-21-7	FC(F)(F)C(F)(F)C(F)(F)C(F)(F)S(=O)(=O)NC(=O)C1CCCC1	O=C(NS(=O)(=O)C(F)(F)C(F)(F)C(F)(F)C(F)(F)F)C1CCCC1	C10H10F9NO3S	0.6266	1247.76	3.96541	12.3291	203.021	2864.98	2.70392	0	-1.6024	22.3491	0.0534938	0	1.57311	FALSE	0	0
869	n:3 fluorotelomer betaine-related, n=6		NA	C[N+](CC(O)=O)(C)CCCC(F)(F)C(F)(F)C(F)(F)C(F)(F)C(F)(F)C(F)(F)C(F)(F)C(F)(F)C(F)(F)C(F)(F)C(F)(F)C(F)(F)C(F)(F)F	C[N+](C)(CCCC(F)(F)C(F)(F)C(F)(F)C(F)(F)C(F)(F)C(F)(F)C(F)(F)C(F)(F)C(F)(F)C(F)(F)C(F)(F)C(F)(F)C(F)(F)F)CC(=O)O	C20H14F27NO2	-1.5262	3685.15	21.2152	13.3938	186.626	2705.83	3.40627	8.5825	-1.75163	-95.4634	-2.92932	1	1.34884	TRUE	1	0
870	3-(Perfluoro-5-methylhexyl)-1,2-propanediol 1-(dihydrogen phosphate)		CAS_RN: 105416-14-6	OC(COP(O)(O)=O)CC(F)(F)C(F)(F)C(F)(F)C(F)(F)C(F)(C(F)(F)F)C(F)(F)F	O=P(O)(O)OCC(O)CC(F)(F)C(F)(F)C(F)(F)C(F)(F)C(F)(C(F)(F)F)C(F)(F)F	C10H8F15O5P	1.4027	2485.3	9.83452	12.7569	194.619	219.515	3.13441	8.87	0	-2.3576	-3.18561	2	1.04047	TRUE	1	0
871	Bis(2-hydroxyethyl)methyl(3-(perfluorooctyl)-2-hydroxypropyl)ammonium iodide		CAS_RN: 93776-18-2	[I-].C[N+](CCO)(CCO)CC(O)CC(F)(F)C(F)(F)C(F)(F)C(F)(F)C(F)(F)C(F)(F)C(F)(F)C(F)(F)F	C[N+](CCO)(CCO)CC(O)CC(F)(F)C(F)(F)C(F)(F)C(F)(F)C(F)(F)C(F)(F)C(F)(F)C(F)(F)F	C16H19F17NO3	-0.8335	2324.46	11.2406	12.9005	150.338	2703.22	3.0811	9.5739	0	-29.8471	-2.98905	0	1.56023	FALSE	0	0
872	10:2 Fluorotelomer alcohol	10:2FTOH	CAS_RN: 865-86-1	OCCC(F)(F)C(F)(F)C(F)(F)C(F)(F)C(F)(F)C(F)(F)C(F)(F)C(F)(F)C(F)(F)C(F)(F)F	OCCC(F)(F)C(F)(F)C(F)(F)C(F)(F)C(F)(F)C(F)(F)C(F)(F)C(F)(F)C(F)(F)C(F)(F)F	C12H5F21O	0.4477	2702.88	15.1596	13.043	216.984	1386.12	2.98239	8.0017	0	-100.498	-3.00033	0	0.966136	TRUE	1	0
873	perfluoroalkanesulfonamido sulfonate betaine D, n=5		NA	S(N(C)CCC[N+](CCCS(=O)(O)=O)(C)C)(=O)(=O)C(F)(F)C(F)(F)C(F)(F)C(F)(F)C(F)(F)F	CN(CCC[N+](C)(C)CCCS(=O)(=O)O)S(=O)(=O)C(F)(F)C(F)(F)C(F)(F)C(F)(F)C(F)(F)F	C14H21F11N2O5S2	-3.0337	1644.67	5.67624	12.6186	146.597	1108.8	3.18544	8.7968	0	17.3563	-0.999087	1	1.34301	TRUE	1	0
874	3,3,4,4,5,5,6,6,7,7,8,8,9,9,10,10,10-Heptadecafluorodecanoyl chloride		CAS_RN: 64018-23-1	FC(F)(F)C(F)(F)C(F)(F)C(F)(F)C(F)(F)C(F)(F)C(F)(F)C(F)(F)CC(Cl)=O	O=C(Cl)CC(F)(F)C(F)(F)C(F)(F)C(F)(F)C(F)(F)C(F)(F)C(F)(F)C(F)(F)F	C10H2ClF17O	-0.8622	2113.34	11.2406	12.795	234.045	-686.676	2.86659	0	-1.96653	-78.4742	-2.96267	0	1.20665	TRUE	1	0
875	Methyl perfluoro-3,6,9-trioxatridecanoate		CAS_RN: 330562-42-0	COC(=O)C(F)(F)OC(F)(F)C(F)(F)OC(F)(F)C(F)(F)OC(F)(F)C(F)(F)C(F)(F)C(F)(F)F	COC(=O)C(F)(F)OC(F)(F)C(F)(F)OC(F)(F)C(F)(F)OC(F)(F)C(F)(F)C(F)(F)C(F)(F)F	C11H3F19O5	-4.395	1846.19	9.74429	12.686	213.304	325.829	2.96106	0	-3.2492	-54.7699	0	0	1.40289	FALSE	0	0
876	N,N'-(Methylenedi-1,4-phenylene)bis(perfluorobutanamide)		CAS_RN: 124232-75-3	FC(F)(F)C(F)(F)C(F)(F)C(=O)NC1=CC=C(CC2=CC=C(NC(=O)C(F)(F)C(F)(F)C(F)(F)F)C=C2)C=C1	O=C(Nc1ccc(Cc2ccc(NC(=O)C(F)(F)C(F)(F)C(F)(F)F)cc2)cc1)C(F)(F)C(F)(F)C(F)(F)F	C21H12F14N2O2	1.2751	1475.08	2.59516	12.5648	203.949	1463.01	3.35421	0	-2.93631	71.6606	-0.0624385	0	1.42212	FALSE	0	0
877	n:2 fluorotelomer thio alkyl amido ammonium_i, n=3		NA	FC(F)(F)C(F)(F)C(F)(F)C(F)(F)C(F)(F)C(F)(F)CCSCC(NCCC[N+](C)(C)C)=O	C[N+](C)(C)CCCNC(=O)CSCCC(F)(F)C(F)(F)C(F)(F)C(F)(F)C(F)(F)C(F)(F)F	C16H21F13N2OS	-2.8786	1589.97	7.47342	12.503	157.246	1696.26	3.23966	0	-0.620009	12.837	-2.18507	0	1.63203	FALSE	0	0
878	2-(Heptafluoropropyl)-3-methyl-1H-indole		CAS_RN: 1030606-42-8	Cc1c(Nc2ccccc12)C(F)(F)C(F)(F)C(F)(F)F	Cc1c(C(F)(F)C(F)(F)C(F)(F)F)[nH]c2ccccc12	C12H8F7N	1.7801	685.38	2.3811	12.2078	176.6	892.747	2.52132	0	0	47.3813	0	0	1.49437	FALSE	0	0
879	3-[2,2,3,3,4,4-Hexafluoro-4-(heptafluoropropoxy)butanamido]-N,N-dimethylpropan-1-amine N-oxide		CAS_RN: 87112-48-9	C[N+](C)([O-])CCCNC(=O)C(F)(F)C(F)(F)C(F)(F)OC(F)(F)C(F)(F)C(F)(F)F	C[N+](C)([O-])CCCNC(=O)C(F)(F)C(F)(F)C(F)(F)OC(F)(F)C(F)(F)C(F)(F)F	C12H13F13N2O3	-4.2248	1482.65	6.12046	12.3988	173.88	1776.21	3.04621	0	-3.22419	-3.7296	-0.969091	0	1.64141	FALSE	0	0
880	3,3,4,4,5,5,5-heptafluoropentanal		CAS_RN: 126015-32-5	FC(F)(F)C(F)(F)C(F)(F)CC=O	O=CCC(F)(F)C(F)(F)C(F)(F)F	C5H3F7O	-2.6987	627	2.3811	11.3356	148.258	262.374	1.58175	0	0	-9.9091	-2.16715	0	1.85675	FALSE	0	0
881	Dimethoxymethyl(3,3,4,4,5,5,6,6,7,7,8,8,8-tridecafluorooctyl)silane		CAS_RN: 85857-17-6	FC(F)(F)C(F)(F)C(F)(F)C(F)(F)C(F)(F)C(F)(F)CC[SiH2]C(OC)OC	COC(OC)[SiH2]CCC(F)(F)C(F)(F)C(F)(F)C(F)(F)C(F)(F)C(F)(F)F	C11H13F13O2Si	-0.0337	1489.13	7.47342	12.4516	199.419	941.207	2.82221	0	0	-12.6094	-2.15732	0	1.23113	TRUE	1	0
882	Heptafluorobutyramide		CAS_RN: 662-50-0	NC(=O)C(F)(F)C(F)(F)C(F)(F)F	NC(=O)C(F)(F)C(F)(F)C(F)(F)F	C4H2F7NO	3.6491	648.25	2.3811	11.4497	144.671	183.422	1.58175	0	-3.03257	-26.8029	0	0	1.78831	FALSE	0	0
883	N-[3-(dimethylamino)propyl]tridecafluorohexanesulphonamide monohydrochloride		CAS_RN: 68957-61-9	Cl.CN(C)CCCNS(=O)(=O)C(F)(F)C(F)(F)C(F)(F)C(F)(F)C(F)(F)C(F)(F)F	CN(C)CCCNS(=O)(=O)C(F)(F)C(F)(F)C(F)(F)C(F)(F)C(F)(F)C(F)(F)F	C11H13F13N2O2S	-2.5495	1738.47	7.47342	12.6305	176.967	2164	3.0173	0	0	-33.0754	-1.03846	0	1.51628	FALSE	0	0
884	(5Z)-1,1,1,2,2,3,3,4,4-Nonafluoro-6-iododec-5-ene		CAS_RN: 107831-93-6	CCCCC(I)=CC(F)(F)C(F)(F)C(F)(F)C(F)(F)F	CCCCC(I)=CC(F)(F)C(F)(F)C(F)(F)C(F)(F)F	C10H10F9I	-1.5878	857.68	3.96541	11.9197	199.339	-1993.97	2.73323	0	-0.136315	21.0596	0.0108847	0	1.65029	FALSE	0	0
885	1-(3-(4-((Heptadecafluorononyl)oxy)-benzamido)propyl)-N,N,N-trimethylammonium iodide		CAS_RN: 59493-72-0	[I-].C[N+](C)(C)CCCNC(=O)C1=CC=C(OC(F)(F)C(F)(F)C(F)(F)C(F)(F)C(F)(F)C(F)(F)C(F)(F)C(F)(F)C(F)(F)F)C=C1	C[N+](C)(C)CCCNC(=O)c1ccc(OC(F)(F)C(F)(F)C(F)(F)C(F)(F)C(F)(F)C(F)(F)C(F)(F)C(F)(F)C(F)(F)F)cc1	C22H19F19N2O2	-2.2007	2574.3	13.1851	13.0699	186.849	3013.6	3.36631	0	-0.928438	10.671	0.0452895	0	1.67552	FALSE	0	0
886	2-Methylpropyl 2,3,3,3-tetrafluoro-2-(heptafluoropropoxy)propanoate		CAS_RN: 183873-54-3	CC(C)COC(=O)C(F)(OC(F)(F)C(F)(F)C(F)(F)F)C(F)(F)F	CC(C)COC(=O)C(F)(OC(F)(F)C(F)(F)C(F)(F)F)C(F)(F)F	C10H9F11O3	-4.1395	1069.96	4.5088	12.1463	226.701	1791.2	2.59102	0	-3.24875	37.0089	-0.980974	0	1.64948	FALSE	0	0
887	5,6,6,6-Tetrafluoro-4-oxo-5-(trifluoromethyl)hexanoic acid		CAS_RN: 62656-74-0	OC(=O)CCC(=O)C(F)(C(F)(F)F)C(F)(F)F	O=C(O)CCC(=O)C(F)(C(F)(F)F)C(F)(F)F	C7H5F7O3	0.3427	1102.17	2.3811	11.687	161.073	503.526	2.12823	7.9965	-2.87509	47.8201	-1.70352	1	1.24133	TRUE	1	0
888	2,2,3,3,4,4,5,5,6,6,7,7,8,8,9,9,10,10,11,11,11-Henicosafluoroundecyl acrylate		CAS_RN: 94231-57-9	FC(F)(F)C(F)(F)C(F)(F)C(F)(F)C(F)(F)C(F)(F)C(F)(F)C(F)(F)C(F)(F)C(F)(F)COC(=O)C=C	C=CC(=O)OCC(F)(F)C(F)(F)C(F)(F)C(F)(F)C(F)(F)C(F)(F)C(F)(F)C(F)(F)C(F)(F)C(F)(F)F	C14H5F21O2	-1.6095	2681.13	15.1596	13.0645	226.54	739.815	3.13444	0	-2.21307	-103.293	-3.45385	0	1.27564	TRUE	1	0
889	multiple H-substituted, multiple ether-substituted perfluoroalkyl alcohols, n=5, m=12		NA	FC(F)(F)C(F)(F)C(F)(F)C(F)(F)C(F)(F)C(F)(F)C(F)(F)C(F)(F)C(F)(F)C(F)(F)CCOCCOCCOCCOCCOCCOCCOCCOCCOCCOCCOCCO[H]	OCCOCCOCCOCCOCCOCCOCCOCCOCCOCCOCCOCCC(F)(F)C(F)(F)C(F)(F)C(F)(F)C(F)(F)C(F)(F)C(F)(F)C(F)(F)C(F)(F)C(F)(F)F	C34H49F21O12	-4.8878	2978.63	15.1596	13.1184	141.718	4855.08	3.45606	8.5588	0	-58.3697	-2.85003	0	2.41595	FALSE	0	0
890	(1H,1H-Perfluoro-14-methylpentadecyl)oxirane		CAS_RN: 54009-77-7	C(C1OC1)C(F)(F)C(F)(F)C(F)(F)C(F)(F)C(F)(F)C(F)(F)C(F)(F)C(F)(C(F)(F)C(F)(F)C(F)(F)C(F)(F)C(F)(C(F)(F)F)C(F)(F)F)F	FC(F)(F)C(F)(C(F)(F)F)C(F)(F)C(F)(F)C(F)(F)C(F)(F)C(F)(F)C(F)(F)C(F)(F)C(F)(F)C(F)(F)C(F)(F)C(F)(F)C(F)(F)CC1CO1	C18H5F31O	-0.5945	4732.56	25.8059	13.5726	229.794	1031.66	3.41987	0	0	-118.093	-2.95351	0	1.49405	FALSE	0	0
891	Decane, 3,3,4,4,5,5,6,6,7,7,8,8-dodecafluoro-1,10-diiodo-		CAS_RN: 1813-83-8	FC(F)(CCI)C(F)(F)C(F)(F)C(F)(F)C(F)(F)C(F)(F)CCI	FC(F)(CCI)C(F)(F)C(F)(F)C(F)(F)C(F)(F)C(F)(F)CCI	C10H8F12I2	-1.0601	1423.98	7.47342	12.4621	219	-5314.95	2.95877	0	0	-49.2066	-1.921	0	2.46387	FALSE	0	0
892	Cyclohexanaminium perfluorononanoate		CAS_RN: 328531-06-2	[NH3+]C1CCCCC1.[O-]C(=O)C(F)(F)C(F)(F)C(F)(F)C(F)(F)C(F)(F)C(F)(F)C(F)(F)C(F)(F)F	O=C(O)C(F)(F)C(F)(F)C(F)(F)C(F)(F)C(F)(F)C(F)(F)C(F)(F)C(F)(F)F	C9HF17O2	1.0975	2150.5	11.2406	12.8044	230.43	101.861	2.72289	7.5919	-4.38549	-98.7974	0	1	0.604182	TRUE	1	0
893	N-ethyl perfluorooctanesulfonamido polyethylene glycol, n=8, m=3		NA	OCCOCCOCCOCCN(CC)S(=O)(=O)C(F)(F)C(F)(F)C(F)(F)C(F)(F)C(F)(F)C(F)(F)C(F)(F)C(F)(F)F	CCN(CCOCCOCCOCCO)S(=O)(=O)C(F)(F)C(F)(F)C(F)(F)C(F)(F)C(F)(F)C(F)(F)C(F)(F)C(F)(F)F	C18H22F17NO6S	-3.0969	2450.72	11.2406	13.0138	163.903	3463.93	3.34248	8.4659	0	-50.8218	-1.38047	0	1.71019	FALSE	0	0
894	6,6,7,7,8,8,9,9,10,10,11,11,11-Tridecafluoro-4-iodoundecan-1-ol		CAS_RN: 132665-00-0	OCCCC(I)CC(F)(F)C(F)(F)C(F)(F)C(F)(F)C(F)(F)C(F)(F)F	OCCCC(I)CC(F)(F)C(F)(F)C(F)(F)C(F)(F)C(F)(F)C(F)(F)F	C11H10F13IO	0.1506	1483.18	7.47342	12.4633	197.362	-3632.1	2.92352	8.4574	0	-0.6106	-2.11064	0	1.77641	FALSE	0	0
895	perfluoroalkylamido ammonium, n=11		CAS_RN: 1513863-79-0	C(NCCCN(C)C)(=O)C(F)(F)C(F)(F)C(F)(F)C(F)(F)C(F)(F)C(F)(F)C(F)(F)C(F)(F)C(F)(F)C(F)(F)C(F)(F)F	CN(C)CCCNC(=O)C(F)(F)C(F)(F)C(F)(F)C(F)(F)C(F)(F)C(F)(F)C(F)(F)C(F)(F)C(F)(F)C(F)(F)C(F)(F)F	C17H13F23N2O	-1.9168	3108.9	17.1586	13.2111	198.577	3066.07	3.29958	0	-3.72899	-100.754	-1.19747	0	1.61788	FALSE	0	0
896	1,1,1,2,2,3,3,4,4,5,5,6,6,7,7,8,8,9,9,10,10,11,11,12,12,13,13-Heptacosafluorodocosane		CAS_RN: 1309378-06-0	CCCCCCCCCC(F)(F)C(F)(F)C(F)(F)C(F)(F)C(F)(F)C(F)(F)C(F)(F)C(F)(F)C(F)(F)C(F)(F)C(F)(F)C(F)(F)C(F)(F)F	CCCCCCCCCC(F)(F)C(F)(F)C(F)(F)C(F)(F)C(F)(F)C(F)(F)C(F)(F)C(F)(F)C(F)(F)C(F)(F)C(F)(F)C(F)(F)C(F)(F)F	C22H19F27	-0.7483	3599.56	21.2152	13.3611	187.039	6241.04	3.40413	0	0	-62.2181	-2.68679	0	2.6697	FALSE	0	0
897	Hexacosafluoro-13-(trifluoromethyl)myristic acid		CAS_RN: 18024-09-4	O=C(C(C(C(C(C(C(C(C(C(C(C(C(C(F)(F)F)(F)C(F)(F)F)(F)F)(F)F)(F)F)(F)F)(F)F)(F)F)(F)F)(F)F)(F)F)(F)F)(F)F)O	O=C(O)C(F)(F)C(F)(F)C(F)(F)C(F)(F)C(F)(F)C(F)(F)C(F)(F)C(F)(F)C(F)(F)C(F)(F)C(F)(F)C(F)(C(F)(F)F)C(F)(F)F	C15HF29O2	0.7132	4511.88	23.7507	13.4795	238.937	-18.4006	3.2301	7.6476	-4.77373	-139.689	0	1	1.03069	TRUE	1	0
898	Cl-substituted,ether-substituted perfluoroalkyl (linear)sulfonic acids, n=4		NA	S(=O)(O)(=O)C(F)(F)C(F)(F)OC(F)(F)C(F)(F)C(F)(F)C(F)(F)Cl	O=S(=O)(O)C(F)(F)C(F)(F)OC(F)(F)C(F)(F)C(F)(F)C(F)(F)Cl	C6HClF12O4S	-0.1537	1382.37	6.23898	12.4008	243.686	152.86	2.58676	7.8862	0	-66.0287	0	1	0.69296	TRUE	1	0
899	Tris[4-(3,3,4,4,5,5,6,6,7,7,8,8,8-tridecafluorooctyl)phenyl]phosphine		CAS_RN: 219985-31-6	FC(F)(F)C(F)(F)C(F)(F)C(F)(F)C(F)(F)C(F)(F)CCC1=CC=C(C=C1)P(C1=CC=C(CCC(F)(F)C(F)(F)C(F)(F)C(F)(F)C(F)(F)C(F)(F)F)C=C1)C1=CC=C(CCC(F)(F)C(F)(F)C(F)(F)C(F)(F)C(F)(F)C(F)(F)F)C=C1	FC(F)(F)C(F)(F)C(F)(F)C(F)(F)C(F)(F)C(F)(F)CCc1ccc(P(c2ccc(CCC(F)(F)C(F)(F)C(F)(F)C(F)(F)C(F)(F)C(F)(F)F)cc2)c2ccc(CCC(F)(F)C(F)(F)C(F)(F)C(F)(F)C(F)(F)C(F)(F)F)cc2)cc1	C42H24F39P	1.1053	4564.95	15.6883	13.6953	207.406	3137.47	3.76448	0	0	118.608	-2.78174	0	2.00666	FALSE	0	0
900	10:2 Fluorotelomer methacrylate		CAS_RN: 2144-54-9	CC(=C)C(=O)OCCC(F)(F)C(F)(F)C(F)(F)C(F)(F)C(F)(F)C(F)(F)C(F)(F)C(F)(F)C(F)(F)C(F)(F)F	C=C(C)C(=O)OCCC(F)(F)C(F)(F)C(F)(F)C(F)(F)C(F)(F)C(F)(F)C(F)(F)C(F)(F)C(F)(F)C(F)(F)F	C16H9F21O2	-1.6077	2758.25	15.1596	13.0752	217.169	1500.6	3.17662	0	-1.72574	-72.6342	-3.01519	0	1.29196	TRUE	1	0
901	perfluoropropane sulfonamide, n=3		NA	NS(=O)(=O)C(F)(F)C(F)(F)C(F)(F)F	NS(=O)(=O)C(F)(F)C(F)(F)C(F)(F)F	C3H2F7NO2S	4.003	736.78	2.3811	11.6883	154.883	187.289	1.58175	0	0	-24.0039	0	0	1.74734	FALSE	0	0
902	Tris(pentafluorophenyl)phosphine		CAS_RN: 1259-35-4	FC=1C(F)=C(F)C(=C(F)C1F)P(C=2C(F)=C(F)C(F)=C(F)C2F)C=3C(F)=C(F)C(F)=C(F)C3F	Fc1c(F)c(F)c(P(c2c(F)c(F)c(F)c(F)c2F)c2c(F)c(F)c(F)c(F)c2F)c(F)c1F	C18F15P	1.1945	1216.7	0	12.7422	328.009	20.2252	3.04927	0	0	-71.6098	0	0	1.73511	FALSE	0	0
903	2-Ethyl-4-(1,1,1,2,3,3,3-heptafluoropropan-2-yl)aniline		CAS_RN: 273735-34-5	CCc1cc(ccc1N)C(F)(C(F)(F)F)C(F)(F)F	CCc1cc(C(F)(C(F)(F)F)C(F)(F)F)ccc1N	C11H10F7N	2.7148	917.21	2.3811	11.9932	151.035	985.985	2.48642	0	0	82.6973	0.0887576	0	1.7334	FALSE	0	0
904	3-(Heptadecafluorooctyl)aniline		CAS_RN: 119489-67-7	NC1=CC=CC(=C1)C(F)(F)C(F)(F)C(F)(F)C(F)(F)C(F)(F)C(F)(F)C(F)(F)C(F)(F)F	Nc1cccc(C(F)(F)C(F)(F)C(F)(F)C(F)(F)C(F)(F)C(F)(F)C(F)(F)C(F)(F)F)c1	C14H6F17N	2.425	2118.17	11.2406	12.9085	221.32	1247.42	2.88197	0	0	-23.5209	0	0	1.20436	TRUE	1	0
905	3-(Perfluorooctyl)propanol		CAS_RN: 1651-41-8	OCCCC(F)(F)C(F)(F)C(F)(F)C(F)(F)C(F)(F)C(F)(F)C(F)(F)C(F)(F)F	OCCCC(F)(F)C(F)(F)C(F)(F)C(F)(F)C(F)(F)C(F)(F)C(F)(F)C(F)(F)F	C11H7F17O	0.2107	2056.38	11.2406	12.7791	202.451	2078.65	2.85147	8.1368	0	-59.1866	-2.60829	0	1.08014	TRUE	1	0
906	1,1,1,2,2,3,3,4,4,5,5,6,6,7,7,8,8-Heptadecafluoroheptacosane		CAS_RN: 871311-26-1	CCCCCCCCCCCCCCCCCCCC(F)(F)C(F)(F)C(F)(F)C(F)(F)C(F)(F)C(F)(F)C(F)(F)C(F)(F)F	CCCCCCCCCCCCCCCCCCCC(F)(F)C(F)(F)C(F)(F)C(F)(F)C(F)(F)C(F)(F)C(F)(F)C(F)(F)F	C27H39F17	-0.8894	2234.25	11.2406	12.8239	143.132	6560.58	3.38524	0	0	9.6673	-2.32842	0	2.86995	FALSE	0	0
907	n:2 fluorotelomer sulfonamido betaine-related, n=8_pos		NA	FC(F)(F)C(F)(F)C(F)(F)C(F)(F)C(F)(F)C(F)(F)C(F)(F)C(F)(F)C(F)(F)C(F)(F)C(F)(F)C(F)(F)C(F)(F)C(F)(F)C(F)(F)C(F)(F)CCS(NCCC[N+](CC(O)=O)(C)C)(=O)=O	C[N+](C)(CCCNS(=O)(=O)CCC(F)(F)C(F)(F)C(F)(F)C(F)(F)C(F)(F)C(F)(F)C(F)(F)C(F)(F)C(F)(F)C(F)(F)C(F)(F)C(F)(F)C(F)(F)C(F)(F)C(F)(F)C(F)(F)F)CC(=O)O	C25H19F33N2O4S	-0.897	4683.18	27.4082	13.6465	190.978	2721.89	3.68259	8.7153	-1.45872	-114.672	-3.52072	1	1.57662	FALSE	0	0
908	4:4 Fluorotelomer alcohol	4:4FTOH	CAS_RN: 3792-02-7	OCCCCC(F)(F)C(F)(F)C(F)(F)C(F)(F)F	OCCCCC(F)(F)C(F)(F)C(F)(F)C(F)(F)F	C8H9F9O	-0.5853	879.5	3.96541	11.8384	153.611	1849.62	2.41312	8.1945	0	1.4027	-1.88271	0	1.44867	FALSE	0	0
909	ketone perfluoroalkyl (linear) carboxylic acids_i, n=8		NA	FC(=O)C(F)(F)C(F)(F)C(F)(F)C(F)(F)C(F)(F)C(F)(F)C(F)(F)C(F)(F)S(=O)(O)=O	O=C(F)C(F)(F)C(F)(F)C(F)(F)C(F)(F)C(F)(F)C(F)(F)C(F)(F)C(F)(F)S(=O)(=O)O	C9HF17O4S	0.7712	2397.59	11.2406	12.9448	237.848	97.1628	2.89257	7.848	-4.9327	-123.42	0	1	0.729094	TRUE	1	0
910	1h,1h-perfluorooctadecan-1-ol		CAS_RN: 242142-82-1	OCC(F)(F)C(F)(F)C(F)(F)C(F)(F)C(F)(F)C(F)(F)C(F)(F)C(F)(F)C(F)(F)C(F)(F)C(F)(F)C(F)(F)C(F)(F)C(F)(F)C(F)(F)C(F)(F)C(F)(F)F	OCC(F)(F)C(F)(F)C(F)(F)C(F)(F)C(F)(F)C(F)(F)C(F)(F)C(F)(F)C(F)(F)C(F)(F)C(F)(F)C(F)(F)C(F)(F)C(F)(F)C(F)(F)C(F)(F)C(F)(F)F	C18H3F35O	0.4981	4739.44	29.4944	13.6418	234.19	544.928	3.44443	7.8122	0	-210.071	-3.9629	0	1.52525	FALSE	0	0
911	3,4,4,4-Tetrafluoro-3-(trifluoromethyl)butanal		CAS_RN: 131118-41-7	FC(F)(F)C(F)(CC=O)C(F)(F)F	O=CCC(F)(C(F)(F)F)C(F)(F)F	C5H3F7O	-2.6987	852	2.3811	11.3776	134.957	272.963	1.58175	0	0	28.0673	-2.27778	0	1.95876	FALSE	0	0
912	NSC146413		CAS_RN: 424-55-5	OC(=O)CSC(CC(O)=O)C(F)(F)C(F)(F)C(F)(F)F	O=C(O)CSC(CC(=O)O)C(F)(F)C(F)(F)C(F)(F)F	C8H7F7O4S	3.1747	639.67	2.3811	11.7658	188.727	97.8904	2.52979	8.3082	-1.99024	31.1736	-1.62167	2	1.22711	TRUE	1	0
913	3,6,9,12,15,18,21-Heptaoxatetracosane, 1,1,1,2,4,4,5,7,7,8,10,10,11,13,13,14,16,16,17,19,19,20,22,22,23,23,24,24,24-nonacosafluoro-5,8,11,14,17,20-hexakis(trifluoromethyl)-		CAS_RN: 59852-65-2	FC(OC(F)(F)C(F)(OC(F)(F)C(F)(OC(F)(F)C(F)(OC(F)(F)C(F)(OC(F)(F)C(F)(OC(F)(F)C(F)(OC(F)(F)C(F)(F)C(F)(F)F)C(F)(F)F)C(F)(F)F)C(F)(F)F)C(F)(F)F)C(F)(F)F)C(F)(F)F)C(F)(F)F	FC(OC(F)(F)C(F)(OC(F)(F)C(F)(OC(F)(F)C(F)(OC(F)(F)C(F)(OC(F)(F)C(F)(OC(F)(F)C(F)(OC(F)(F)C(F)(F)C(F)(F)F)C(F)(F)F)C(F)(F)F)C(F)(F)F)C(F)(F)F)C(F)(F)F)C(F)(F)F)C(F)(F)F	C23HF47O7	-3.0603	5014.06	0	13.7382	245.891	-42.4173	3.66756	0	0	-47.5766	0	0	1.607	FALSE	0	0
914	Diammonium 3,3,4,4,5,5,6,6,7,7,8,8,9,9,10,10,11,11,12,12,12-henicosafluorododecyl phosphate		CAS_RN: 93857-45-5	[NH4+].[NH4+].[O-]P(=O)([O-])OCCC(F)(F)C(F)(F)C(F)(F)C(F)(F)C(F)(F)C(F)(F)C(F)(F)C(F)(F)C(F)(F)C(F)(F)F	O=P(O)(O)OCCC(F)(F)C(F)(F)C(F)(F)C(F)(F)C(F)(F)C(F)(F)C(F)(F)C(F)(F)C(F)(F)C(F)(F)F	C12H6F21O4P	0.3268	2728.01	15.1596	13.0777	210.812	358.399	3.16937	8.2253	0	-94.1275	-3.22828	2	0.928708	TRUE	1	0
915	1,1,1,2,2,3,3,4,4,7,7,8,8,9,9,10,10,10-Octadecafluorodec-5-ene		CAS_RN: 84551-43-9	FC(F)(F)C(F)(F)C(F)(F)C(F)(F)C=CC(F)(F)C(F)(F)C(F)(F)C(F)(F)F	FC(F)(F)C(F)(F)C(F)(F)C(F)(F)C=CC(F)(F)C(F)(F)C(F)(F)C(F)(F)F	C10H2F18	-0.9923	1630.13	8.60682	12.5455	214.345	320.154	2.79336	0	0	-60.8099	0	0	1.13019	TRUE	1	0
916	H-substituted Perfluoroalkyl (linear) carboxylic acids_i, n=14		NA	C(O)(=O)C(F)C(F)(F)C(F)(F)C(F)(F)C(F)(F)C(F)(F)C(F)(F)C(F)(F)C(F)(F)C(F)(F)C(F)(F)C(F)(F)C(F)(F)C(F)(F)C(F)(F)F	O=C(O)C(F)C(F)(F)C(F)(F)C(F)(F)C(F)(F)C(F)(F)C(F)(F)C(F)(F)C(F)(F)C(F)(F)C(F)(F)C(F)(F)C(F)(F)C(F)(F)C(F)(F)F	C16H2F30O2	0.6228	4107.13	23.2671	13.475	236.474	100.372	3.3506	7.7672	-4.12445	-181.286	0	1	0.972776	TRUE	1	0
917	Methanaminium perfluorononanoate		CAS_RN: 77032-23-6	C[NH3+].[O-]C(=O)C(F)(F)C(F)(F)C(F)(F)C(F)(F)C(F)(F)C(F)(F)C(F)(F)C(F)(F)F	O=C(O)C(F)(F)C(F)(F)C(F)(F)C(F)(F)C(F)(F)C(F)(F)C(F)(F)C(F)(F)F	C9HF17O2	1.0975	2150.5	11.2406	12.8044	230.43	101.861	2.72289	7.5919	-4.38549	-98.7974	0	1	0.604182	TRUE	1	0
918	n:1 fluorotelomer sulfonic acids, n=7		NA	FC(F)(F)C(F)(F)C(F)(F)C(F)(F)C(F)(F)C(F)(F)C(F)(F)CS(=O)(O)=O	O=S(=O)(O)CC(F)(F)C(F)(F)C(F)(F)C(F)(F)C(F)(F)C(F)(F)C(F)(F)F	C8H3F15O3S	0.7155	1996.9	9.33326	12.6781	220.868	41.7817	2.70342	8.0387	0	-56.6178	-3.64361	1	0.871865	TRUE	1	0
919	double bond perfluoroalkyl (linear) sulfonic aicds, n=10		NA	F/C(C(F)(F)C(F)(F)C(F)(F)C(F)(F)C(F)(F)C(F)(F)C(F)(F)C(F)(F)C(F)(F)C(F)(F)S(=O)(O)=O)=C(F)C(F)(F)F	O=S(=O)(O)C(F)(F)C(F)(F)C(F)(F)C(F)(F)C(F)(F)C(F)(F)C(F)(F)C(F)(F)C(F)(F)C(F)(F)C(F)=C(F)C(F)(F)F	C13HF25O3S	0.574	3282.28	15.9001	13.2668	241.649	83.4747	3.28576	7.8801	-5.5982	-149.864	0	1	0.962146	TRUE	1	0
920	1-(Chloro[4-(2-(perfluorooctyl)ethyl)phenyl]phenylmethyl)-4-methoxybenzene		CAS_RN: 865758-37-8	COC1=CC=C(C=C1)C(Cl)(C1=CC=CC=C1)C1=CC=C(CCC(F)(F)C(F)(F)C(F)(F)C(F)(F)C(F)(F)C(F)(F)C(F)(F)C(F)(F)F)C=C1	COc1ccc(C(Cl)(c2ccccc2)c2ccc(CCC(F)(F)C(F)(F)C(F)(F)C(F)(F)C(F)(F)C(F)(F)C(F)(F)C(F)(F)F)cc2)cc1	C30H20ClF17O	0.57	2286.14	10.5557	13.1701	211.237	2676.69	3.52678	0	0	74.7663	-2.51743	0	1.66617	FALSE	0	0
921	Perfluorooctaneamide betaine	PFOAB	CAS_RN: 90179-39-8	C[N+](C)(CCCNC(=O)C(F)(F)C(F)(F)C(F)(F)C(F)(F)C(F)(F)C(F)(F)C(F)(F)F)CC([O-])=O	C[N+](C)(CCCNC(=O)C(F)(F)C(F)(F)C(F)(F)C(F)(F)C(F)(F)C(F)(F)C(F)(F)F)CC(=O)O	C15H15F15N2O3	-2.3821	2031.48	9.33326	12.7601	162.918	2234.66	3.1692	8.6212	-3.49314	-26.9869	-1.11501	1	1.24898	TRUE	1	0
922	perfluoroalkylamido betaine-related, n=7		NA	C(NCCC[N+](CC(O)=O)(C)C)(=O)C(F)(F)C(F)(F)C(F)(F)C(F)(F)C(F)(F)C(F)(F)C(F)(F)F	C[N+](C)(CCCNC(=O)C(F)(F)C(F)(F)C(F)(F)C(F)(F)C(F)(F)C(F)(F)C(F)(F)F)CC(=O)O	C15H15F15N2O3	-2.3821	2031.48	9.33326	12.7601	162.918	2234.66	3.1692	8.6212	-3.49314	-26.9869	-1.11501	1	1.24898	TRUE	1	0
923	1-(Perfluoro-n-octyl)hexadecane		CAS_RN: 117146-18-6	CCCCCCCCCCCCCCCCC(C(C(C(C(C(C(C(F)(F)F)(F)F)(F)F)(F)F)(F)F)(F)F)(F)F)(F)F	CCCCCCCCCCCCCCCCC(F)(F)C(F)(F)C(F)(F)C(F)(F)C(F)(F)C(F)(F)C(F)(F)C(F)(F)F	C24H33F17	-0.9579	2197.5	11.2406	12.8156	147.599	6199.27	3.32828	0	0	6.7595	-2.32899	0	2.73305	FALSE	0	0
924	Bis(1H,1H-perfluorooct-1-yl)amine		CAS_RN: 3145-68-4	FC(F)(F)C(F)(F)C(F)(F)C(F)(F)C(F)(F)C(F)(F)C(F)(F)CNCC(F)(F)C(F)(F)C(F)(F)C(F)(F)C(F)(F)C(F)(F)C(F)(F)F	FC(F)(F)C(F)(F)C(F)(F)C(F)(F)C(F)(F)C(F)(F)C(F)(F)CNCC(F)(F)C(F)(F)C(F)(F)C(F)(F)C(F)(F)C(F)(F)C(F)(F)F	C16H5F30N	-0.2997	3469.19	18.5553	13.31	209.312	1131.93	3.393	0	0	-145.474	-4.2194	0	1.51024	FALSE	0	0
925	4,5,6,7-Tetrafluoro-3-(heptafluoropropyl)-1H-indazole		CAS_RN: 1610931-26-4	Fc1c2Nnc(c2c(F)c(F)c1F)C(F)(F)C(F)(F)C(F)(F)F	Fc1c(F)c(F)c2c(C(F)(F)C(F)(F)C(F)(F)F)n[nH]c2c1F	C10HF11N2	2.1327	944.82	2.3811	12.4517	243.783	205	2.52956	0	0	-22.6833	0	0	1.28642	TRUE	1	0
926	3-Phenyl-5-(tridecafluorohexyl)-1,2,4-oxadiazole		CAS_RN: 146304-76-9	FC(F)(F)C(F)(F)C(F)(F)C(F)(F)C(F)(F)C(F)(F)c1nc(no1)-c1ccccc1	FC(F)(F)C(F)(F)C(F)(F)C(F)(F)C(F)(F)C(F)(F)c1nc(-c2ccccc2)no1	C14H5F13N2O	-0.738	1585.58	7.47342	12.708	234.53	1416.88	2.85097	0	0	-1.2665	0	0	1.27074	TRUE	1	0
927	4H,4H-Perfluoro-6,6-dimethylheptane-3,5-dione		CAS_RN: 2145-68-8	CC(C)(C)C(=O)CC(=O)C(F)(F)C(F)(F)F	CC(C)(C)C(=O)CC(=O)C(F)(F)C(F)(F)F	C9H11F5O2	-2.3971	460.81	1.10521	11.3455	139.642	83.7841	2.33355	0	-2.41674	47.4612	-1.42063	0	1.83126	FALSE	0	0
928	2-(3,3,4,4,5,5,6,6,6-Nonafluorohexyl)propane-1,3-diol		CAS_RN: 152220-76-3	OCC(CO)CCC(F)(F)C(F)(F)C(F)(F)C(F)(F)F	OCC(CO)CCC(F)(F)C(F)(F)C(F)(F)C(F)(F)F	C9H11F9O2	0.7777	974.75	3.96541	11.9037	141.928	1755.67	2.58719	8.4942	0	13.6124	-2.04419	0	1.49835	FALSE	0	0
929	Perfluoro-9-(trifluoromethyl)decanoic acid		CAS_RN: 16486-94-5	O=C(C(C(C(C(C(C(C(C(C(F)(F)F)(F)C(F)(F)F)(F)F)(F)F)(F)F)(F)F)(F)F)(F)F)(F)F)O	O=C(O)C(F)(F)C(F)(F)C(F)(F)C(F)(F)C(F)(F)C(F)(F)C(F)(F)C(F)(C(F)(F)F)C(F)(F)F	C11HF21O2	0.9313	3321.63	15.6749	13.113	234.684	-21.0883	3.08087	7.6201	-4.56454	-87.4295	0	1	0.706035	TRUE	1	0
930	Bis((perfluorohexyl)ethyl) diazene-1,2-dicarboxylate		CAS_RN: 452912-11-7	FC(F)(F)C(F)(F)C(F)(F)C(F)(F)C(F)(F)C(F)(F)CCOC(=O)N=NC(=O)OCCC(F)(F)C(F)(F)C(F)(F)C(F)(F)C(F)(F)C(F)(F)F	O=C(N=NC(=O)OCCC(F)(F)C(F)(F)C(F)(F)C(F)(F)C(F)(F)C(F)(F)F)OCCC(F)(F)C(F)(F)C(F)(F)C(F)(F)C(F)(F)C(F)(F)F	C18H8F26N2O4	-2.4256	3057.33	10.6658	13.1436	205.661	1755.16	3.38314	0	-2.67492	-90.2313	-3.15591	0	1.43691	FALSE	0	0
931	2,2,3,4,4,5,5,6,6,7,7,7-Dodecafluoro-3-(trifluoromethyl)heptanoic acid		CAS_RN: 705240-04-6	OC(=O)C(F)(F)C(F)(C(F)(F)F)C(F)(F)C(F)(F)C(F)(F)C(F)(F)F	O=C(O)C(F)(F)C(F)(C(F)(F)F)C(F)(F)C(F)(F)C(F)(F)C(F)(F)F	C8HF15O2	1.2039	2189.19	9.83452	12.7225	224.141	23.0754	2.6657	7.654	-4.48785	-47.306	0	1	0.654303	TRUE	1	0
932	4-Bromo-1,1,1,2-tetrafluoro-2-(trifluoromethyl)butane		CAS_RN: 1274903-97-7	FC(F)(F)C(F)(CCBr)C(F)(F)F	FC(F)(F)C(F)(CCBr)C(F)(F)F	C5H4BrF7	-2.3839	776.18	2.3811	11.3776	167.087	-1042.47	1.58175	0	0	36.9307	-1.49331	0	1.83899	FALSE	0	0
933	Perfluorooctanenitrile		CAS_RN: 647-12-1	FC(F)(F)C(F)(F)C(F)(F)C(F)(F)C(F)(F)C(F)(F)C(F)(F)C#N	N#CC(F)(F)C(F)(F)C(F)(F)C(F)(F)C(F)(F)C(F)(F)C(F)(F)F	C8F15N	-0.9825	1729.31	9.33326	12.5859	238.484	5.16402	2.56684	0	0	-93.3141	0	0	1.14675	TRUE	1	0
934	12-Bromo-1,1,1,2,2,3,3,4,4,5,5,6,6,7,7,8,8,9,9,10,10-henicosafluorododecane		CAS_RN: 332136-76-2	FC(F)(F)C(F)(F)C(F)(F)C(F)(F)C(F)(F)C(F)(F)C(F)(F)C(F)(F)C(F)(F)C(F)(F)CCBr	FC(F)(F)C(F)(F)C(F)(F)C(F)(F)C(F)(F)C(F)(F)C(F)(F)C(F)(F)C(F)(F)C(F)(F)CCBr	C12H4BrF21	-0.8006	2614.49	15.1596	13.043	228.653	-1162.12	3.14302	0	0	-95.308	-2.45197	0	1.28502	TRUE	1	0
935	ammonium 8-chlorotetradecafluorooctanoate (EINECS)		CAS_RN: 16557-94-1	[NH4+].[O-]C(=O)C(F)(F)C(F)(F)C(F)(F)C(F)(F)C(F)(F)C(F)(F)C(F)(F)Cl	O=C(O)C(F)(F)C(F)(F)C(F)(F)C(F)(F)C(F)(F)C(F)(F)C(F)(F)Cl	C8HClF14O2	1.4285	1738.15	9.33326	12.6412	236.616	87.495	2.65244	7.6405	-4.19667	-100.777	0	1	0.641274	TRUE	1	0
936	Perfluorobutylsulphonamide		CAS_RN: 30334-69-1	FC(F)(C(F)(F)C(F)(F)F)C(F)(F)S(=O)(N)=O	NS(=O)(=O)C(F)(F)C(F)(F)C(F)(F)C(F)(F)F	C4H2F9NO2S	3.4245	1040.59	3.96541	12.0588	195.338	189.8	2.04158	0	0	-38.5375	0	0	1.4033	FALSE	0	0
937	Glycine, N-ethyl-N-[(nonafluorobutyl)sulfonyl]-, ethyl ester		CAS_RN: 67584-63-8	C(N([S](=O)(=O)C(F)(F)C(F)(F)C(F)(F)C(F)(F)F)CC(=O)OCC)C	CCOC(=O)CN(CC)S(=O)(=O)C(F)(F)C(F)(F)C(F)(F)C(F)(F)F	C10H12F9NO4S	-4.1369	1224.55	3.96541	12.3489	171.189	1464.82	2.94625	0	-1.46794	-9.9301	-1.52152	0	1.60828	FALSE	0	0
938	2,2,3,3,4,4,5,5,5-nonafluoropentanenitrile		CAS_RN: 22325-71-9	FC(F)(F)C(F)(F)C(F)(F)C(F)(F)C#N	N#CC(F)(F)C(F)(F)C(F)(F)C(F)(F)F	C5F9N	-1.5754	836.63	3.96541	11.7713	218.321	7.63958	1.58175	0	0	-53.1653	0	0	1.45106	FALSE	0	0
939	[1,2-Difluoro-2-(heptafluoropropoxy)ethenyl]benzene		CAS_RN: 854992-57-7	FC(OC(F)(F)C(F)(F)C(F)(F)F)=C(F)C1=CC=CC=C1	FC(OC(F)(F)C(F)(F)C(F)(F)F)=C(F)c1ccccc1	C11H5F9O	-1.2707	799.92	2.3811	11.8002	223.067	1092.28	2.59542	0	-2.8934	34.9042	0	0	1.42395	FALSE	0	0
940	ether-substituted perfluoroalkyl (linear) caborxylic acids_i, n=4		CAS_RN: 137780-68-8	FC(F)(F)C(F)(F)C(F)(F)C(F)(F)OC(F)(C(F)(F)F)C(O)=O	O=C(O)C(F)(OC(F)(F)C(F)(F)C(F)(F)C(F)(F)F)C(F)(F)F	C7HF13O3	-0.0962	1331.25	6.23898	12.315	220.007	103.19	2.46903	7.7519	-4.04556	-31.7534	0	1	0.738223	TRUE	1	0
941	4-[3-(Perfluorobutyl)-1-propyloxy]benzyl??alcohol		CAS_RN: 892154-51-7	OCC1=CC=C(OCCCC(F)(F)C(F)(F)C(F)(F)C(F)(F)F)C=C1	OCc1ccc(OCCCC(F)(F)C(F)(F)C(F)(F)C(F)(F)F)cc1	C14H13F9O2	0.1042	963.67	3.96541	12.0282	155.891	1448.52	2.80305	8.7948	0	32.6414	-1.93017	0	1.37318	FALSE	0	0
942	1 OH-substituted n:2 fluorotelomer sulfonic acids, n=4		NA	FC(F)(F)C(F)(F)C(F)(F)C(F)(F)CC(O)S(=O)(O)=O	O=S(=O)(O)C(O)CC(F)(F)C(F)(F)C(F)(F)C(F)(F)F	C6H5F9O4S	2.7547	996.47	3.96541	12.0275	187.091	-326.043	2.42089	8.4416	0	-3.8901	-2.99913	1	1.16448	TRUE	1	0
943	(6E)-1,1,1,2,2,3,3,10,10,11,11,12,12,12-Tetradecafluoro-4,4,9,9-tetrakis(trifluoromethyl)dodec-6-ene		CAS_RN: 1946796-71-9	FC(F)(F)C(F)(F)C(F)(F)C(CC=CCC(C(F)(F)F)(C(F)(F)F)C(F)(F)C(F)(F)C(F)(F)F)(C(F)(F)F)C(F)(F)F	FC(F)(F)C(F)(F)C(F)(F)C(CC=CCC(C(F)(F)F)(C(F)(F)F)C(F)(F)C(F)(F)C(F)(F)F)(C(F)(F)F)C(F)(F)F	C16H6F26	-0.7196	4334.75	16.411	13.2499	204.183	1379.77	3.21821	0	0	151.725	-4.28601	0	1.90475	FALSE	0	0
944	Perfluoroundecanoic acid calcium salt (2:1)		CAS_RN: 97163-17-2	[Ca++].[O-]C(=O)C(F)(F)C(F)(F)C(F)(F)C(F)(F)C(F)(F)C(F)(F)C(F)(F)C(F)(F)C(F)(F)C(F)(F)F.[O-]C(=O)C(F)(F)C(F)(F)C(F)(F)C(F)(F)C(F)(F)C(F)(F)C(F)(F)C(F)(F)C(F)(F)C(F)(F)F	O=C(O)C(F)(F)C(F)(F)C(F)(F)C(F)(F)C(F)(F)C(F)(F)C(F)(F)C(F)(F)C(F)(F)C(F)(F)F	C11HF21O2	0.9313	2745.63	15.1596	13.0678	234.684	99.7147	2.9572	7.6174	-4.55117	-125.406	0	1	0.676432	TRUE	1	0
945	6-[(4,6-Dimethylpyrimidin-2-yl)sulfanyl]-3-(heptafluoropropyl)[1,2,4]triazolo[4,3-b]pyridazine		CAS_RN: 351346-36-6	Cc1cc(C)nc(Sc2ccc3nnc(n3n2)C(F)(F)C(F)(F)C(F)(F)F)n1	Cc1cc(C)nc(Sc2ccc3nnc(C(F)(F)C(F)(F)C(F)(F)F)n3n2)n1	C14H9F7N6S	-1.601	773.34	2.3811	12.3986	235.292	326.597	2.94936	0	0	1.0192	0	0	1.33784	TRUE	1	0
946	Hexanamide, 2-[2,4-bis(1,1-dimethylpropyl)phenoxy]-N-[4-[(2,2,3,3,4,4,4-heptafluoro-1-oxobutyl)amino]-3-hydroxyphenyl]-		CAS_RN: 2923-93-5	CCCCC(Oc1ccc(cc1C(C)(C)CC)C(C)(C)CC)C(=O)Nc1ccc(NC(=O)C(F)(F)C(F)(F)C(F)(F)F)c(O)c1	CCCCC(Oc1ccc(C(C)(C)CC)cc1C(C)(C)CC)C(=O)Nc1ccc(NC(=O)C(F)(F)C(F)(F)C(F)(F)F)c(O)c1	C32H41F7N2O4	0.5305	1225.41	1.60328	12.6294	156.361	1611.32	3.37365	10.2099	-2.98232	62.8034	0.318605	0	1.43221	FALSE	0	0
947	double bond-, H-substituted perfluoroalkyl sulfonic acids, n=1		NA	FC(/C(F)=C(F)/C(F)(F)F)([H])C(F)(F)S(=O)(O)=O	O=S(=O)(O)C(F)(F)C(F)/C(F)=C(\F)C(F)(F)F	C5H2F8O3S	1.2202	707.28	0.25	11.5545	209.17	-300.07	2.02009	7.8867	-3.8297	-34.109	0	1	1.08762	TRUE	1	0
948	Tris(2-methylpropyl) 3-(2,2,3,3,4,4,4-heptafluorobutanamido)propane-1,1,3-tricarboxylate		CAS_RN: 95654-14-1	CC(C)COC(=O)C(CC(C(=O)OCC(C)C)C(=O)OCC(C)C)NC(=O)C(F)(F)C(F)(F)C(F)(F)F	CC(C)COC(=O)C(CC(C(=O)OCC(C)C)C(=O)OCC(C)C)NC(=O)C(F)(F)C(F)(F)C(F)(F)F	C22H32F7NO7	-3.3208	1191.36	2.3811	12.1686	202.055	1767.18	3.34493	0	-3.17484	34.7031	-1.17639	0	1.5958	FALSE	0	0
949	Diethoxy(2-(perfluorooctyl)-1-ethyl)methylsilane		CAS_RN: 152992-46-6	CCO[Si](C)(CCC(F)(F)C(F)(F)C(F)(F)C(F)(F)C(F)(F)C(F)(F)C(F)(F)C(F)(F)F)OCC	CCO[Si](C)(CCC(F)(F)C(F)(F)C(F)(F)C(F)(F)C(F)(F)C(F)(F)C(F)(F)C(F)(F)F)OCC	C15H17F17O2Si	0.8248	2125.46	11.2406	12.8687	170.695	1540.79	3.11283	0	0	-11.9337	-2.50266	0	1.3898	FALSE	0	0
950	Ammonium bis[3,3,4,4,5,5,6,6,7,7,8,8,9,9,10,10,11,11,12,12,13,13,14,14,15,15,16,16,17,18,18,18-dotriacontafluoro-17-(trifluoromethyl)octadecyl] phosphate		CAS_RN: 93776-28-4	[NH4+].[O-]P(=O)(OCCC(F)(F)C(F)(F)C(F)(F)C(F)(F)C(F)(F)C(F)(F)C(F)(F)C(F)(F)C(F)(F)C(F)(F)C(F)(F)C(F)(F)C(F)(F)C(F)(F)C(F)(C(F)(F)F)C(F)(F)F)OCCC(F)(F)C(F)(F)C(F)(F)C(F)(F)C(F)(F)C(F)(F)C(F)(F)C(F)(F)C(F)(F)C(F)(F)C(F)(F)C(F)(F)C(F)(F)C(F)(F)C(F)(C(F)(F)F)C(F)(F)F	O=P(O)(OCCC(F)(F)C(F)(F)C(F)(F)C(F)(F)C(F)(F)C(F)(F)C(F)(F)C(F)(F)C(F)(F)C(F)(F)C(F)(F)C(F)(F)C(F)(F)C(F)(F)C(F)(C(F)(F)F)C(F)(F)F)OCCC(F)(F)C(F)(F)C(F)(F)C(F)(F)C(F)(F)C(F)(F)C(F)(F)C(F)(F)C(F)(F)C(F)(F)C(F)(F)C(F)(F)C(F)(F)C(F)(F)C(F)(C(F)(F)F)C(F)(F)F	C38H9F70O4P	-0.5363	10753.6	0	14.3839	227.997	734.834	3.85098	9.1945	0	-283.8	-4.47635	1	2.58412	FALSE	0	0
951	(Perfluorooctadecyl)ethyl 2-propenoate		CAS_RN: 65104-64-5	C(OC(C=C)=O)CC(C(C(C(C(C(C(C(C(C(C(C(C(C(C(C(C(C(F)(F)F)(F)F)(F)F)(F)F)(F)F)(F)F)(F)F)(F)F)(F)F)(F)F)(F)F)(F)F)(F)F)(F)F)(F)F)(F)F)(F)F)(F)F	C=CC(=O)OCCC(F)(F)C(F)(F)C(F)(F)C(F)(F)C(F)(F)C(F)(F)C(F)(F)C(F)(F)C(F)(F)C(F)(F)C(F)(F)C(F)(F)C(F)(F)C(F)(F)C(F)(F)C(F)(F)C(F)(F)C(F)(F)F	C23H7F37O2	-0.9427	5100.92	31.5895	13.7217	228.999	1719.9	3.54101	0	-2.02365	-194.188	-3.38226	0	1.77062	FALSE	0	0
952	Allyl perfluoroisopropyl ether		CAS_RN: 15242-17-8	FC(F)(F)C(F)(OCC=C)C(F)(F)F	C=CCOC(F)(C(F)(F)F)C(F)(F)F	C6H5F7O	-4.9356	706	2.3811	11.4104	161.044	905.568	1.58175	0	0	28.641	-1.19889	0	1.99068	FALSE	0	0
953	2-Ethylhexyl 2,3,3,3-tetrafluoro-2-(heptafluoropropoxy)propanoate		CAS_RN: 340034-61-9	CCCCC(CC)COC(=O)C(F)(OC(F)(F)C(F)(F)C(F)(F)F)C(F)(F)F	CCCCC(CC)COC(=O)C(F)(OC(F)(F)C(F)(F)C(F)(F)F)C(F)(F)F	C14H17F11O3	-3.487	1131.38	4.5088	12.1953	162.361	3309.57	3.10738	0	-3.21519	62.8005	-0.915002	0	2.02698	FALSE	0	0
954	multiple H-substituted, multiple ether-substituted perfluoroalkyl alcohols, n=3, m=10		NA	FC(F)(F)C(F)(F)C(F)(F)C(F)(F)C(F)(F)C(F)(F)CCOCCOCCOCCOCCOCCOCCOCCOCCOCCO[H]	OCCOCCOCCOCCOCCOCCOCCOCCOCCOCCC(F)(F)C(F)(F)C(F)(F)C(F)(F)C(F)(F)C(F)(F)F	C26H41F13O10	-5.4602	1730.88	7.47342	12.516	130.073	2858.61	3.37721	8.5376	0	-19.4381	-2.42727	0	2.04365	FALSE	0	0
955	Nonanoic acid, 2,4,6,8,9-pentachloro-2,3,3,4,5,5,6,7,7,8,9,9-dodecafluoro-		CAS_RN: 754-87-0	OC(=O)C(F)(Cl)C(F)(F)C(F)(Cl)C(F)(F)C(F)(Cl)C(F)(F)C(F)(Cl)C(F)(F)Cl	O=C(O)C(F)(Cl)C(F)(F)C(F)(Cl)C(F)(F)C(F)(Cl)C(F)(F)C(F)(Cl)C(F)(F)Cl	C9HCl5F12O2	1.9232	1470.4	11.2406	12.8044	283.672	-104.079	3.0288	8.4182	-3.09545	-84.0726	0	1	0.909037	TRUE	1	0
956	Perfluoro-2-butyltetrahydrofuran		CAS_RN: 335-36-4	O1C(C(C(C(F)(F)C(F)(F)F)(F)F)(F)F)(C(C(C1(F)F)(F)F)(F)F)F	FC(F)(F)C(F)(F)C(F)(F)C(F)(F)C1(F)OC(F)(F)C(F)(F)C1(F)F	C8F16O	-1.148	1802.63	11.7549	12.948	235.401	-38.2491	2.62596	0	0	-67.1941	0	0	1.14043	TRUE	1	0
957	1-((3-(Dimethylamino)propyl)amino)-(3-(perfluorodecyl))propan-2-ol		CAS_RN: 94159-80-5	C(NCCCN(C)C)C(O)CC(F)(F)C(F)(F)C(F)(F)C(F)(F)C(F)(F)C(F)(F)C(F)(F)C(F)(F)C(F)(F)C(F)(F)F	CN(C)CCCNCC(O)CC(F)(F)C(F)(F)C(F)(F)C(F)(F)C(F)(F)C(F)(F)C(F)(F)C(F)(F)C(F)(F)C(F)(F)F	C18H19F21N2O	-1.4056	2831.42	15.1596	13.0901	176.766	3416.56	3.2993	9.3202	0	-64.3129	-3.04132	0	1.64571	FALSE	0	0
958	1,1,2,2,3,3,4,4,5,5,6,6,6-tridecafluoro-N-(2-hydroxyethyl)hexane-1-sulfonamide		CAS_RN: 106443-63-4	FC(C(F)(F)F)(F)C(F)(F)C(F)(F)C(F)(F)C(F)(F)S(=O)(NCCO)=O	O=S(=O)(NCCO)C(F)(F)C(F)(F)C(F)(F)C(F)(F)C(F)(F)C(F)(F)F	C8H6F13NO3S	0.9953	1686.93	7.47342	12.6113	207.03	1394.46	2.75247	8.1555	0	-52.5846	-1.46721	0	0.856085	TRUE	1	0
959	3-(Tridecafluorohexyl)pyridin-4-amine		CAS_RN: 143094-26-2	NC1=C(C=NC=C1)C(F)(F)C(F)(F)C(F)(F)C(F)(F)C(F)(F)C(F)(F)F	Nc1ccncc1C(F)(F)C(F)(F)C(F)(F)C(F)(F)C(F)(F)C(F)(F)F	C11H5F13N2	2.0299	1592.54	7.47342	12.6153	202.941	848.664	2.7717	0	0	-20.8091	0	0	1.19596	TRUE	1	0
960	4,4,5,5,6,6,7,7,8,8,9,9,10,11,11,11-Hexadecafluoro-10-(trifluoromethyl)undecane-1,2-diol		CAS_RN: 67824-44-6	C(O)C(O)CC(F)(F)C(F)(F)C(F)(F)C(F)(F)C(F)(F)C(F)(F)C(F)(C(F)(F)F)C(F)(F)F	OCC(O)CC(F)(F)C(F)(F)C(F)(F)C(F)(F)C(F)(F)C(F)(F)C(F)(C(F)(F)F)C(F)(F)F	C12H7F19O2	1.5557	3029.56	13.7028	12.9969	206.092	1389.24	3.10915	8.5368	0	-33.3697	-3.17829	0	1.06167	TRUE	1	0
961	(Perfluorohexyl)ethylene		CAS_RN: 25291-17-2	C(C(C(C(C(C(F)(F)C(F)(F)F)(F)F)(F)F)(F)F)(F)F)=C	C=CC(F)(F)C(F)(F)C(F)(F)C(F)(F)C(F)(F)C(F)(F)F	C8H3F13	-1.4704	1423.13	7.47342	12.3785	207.647	592.391	2.47366	0	0	-60.6273	0	0	1.20682	TRUE	1	0
962	N-(Perfluorobutanoyl)glutamic acid 1-ethyl ester		CAS_RN: 88435-87-4	CCOC(=O)[C@@H](CCC(O)=O)NC(=O)C(F)(F)C(F)(F)C(F)(F)F	CCOC(=O)[C@@H](CCC(=O)O)NC(=O)C(F)(F)C(F)(F)C(F)(F)F	C11H12F7NO5	-1.4693	848.19	2.3811	11.8465	181.703	1419.4	2.79661	8.4222	-3.08957	8.5292	-0.870044	1	1.12049	TRUE	1	0
963	3,3,4,4,5,5,6,6,7,7,8,8,8-Tridecafluorooctyl methanesulfonate		CAS_RN: 156575-40-5	CS(=O)(=O)OCCC(F)(F)C(F)(F)C(F)(F)C(F)(F)C(F)(F)C(F)(F)F	CS(=O)(=O)OCCC(F)(F)C(F)(F)C(F)(F)C(F)(F)C(F)(F)C(F)(F)F	C9H7F13O3S	-2.2769	1527.8	7.47342	12.4644	186.751	89.9211	2.72597	0	0	-34.3695	-2.68883	0	1.37136	FALSE	0	0
964	perfluoroalkanesulfonamido quaternary ammonium alcohol sulfonic acid, n=8		NA	S(N(CCCS(O)(=O)=O)CCC[N+](CCO)(C)C)(=O)(=O)C(F)(F)C(F)(F)C(F)(F)C(F)(F)C(F)(F)C(F)(F)C(F)(F)C(F)(F)F	C[N+](C)(CCO)CCCN(CCCS(=O)(=O)O)S(=O)(=O)C(F)(F)C(F)(F)C(F)(F)C(F)(F)C(F)(F)C(F)(F)C(F)(F)C(F)(F)F	C18H23F17N2O6S2	-1.6972	2572.16	11.2406	13.0811	162.421	2608.64	3.41494	8.9585	0	-17.6751	-1.63797	1	1.35236	TRUE	1	0
965	4,4,5,5,6,6,7,7,8,8,9,9,10,10,11,11,12,12,13,13,13-Henicosafluorotridecanenitrile		CAS_RN: 140834-59-9	FC(F)(F)C(F)(F)C(F)(F)C(F)(F)C(F)(F)C(F)(F)C(F)(F)C(F)(F)C(F)(F)C(F)(F)CCC#N	N#CCCC(F)(F)C(F)(F)C(F)(F)C(F)(F)C(F)(F)C(F)(F)C(F)(F)C(F)(F)C(F)(F)C(F)(F)F	C13H4F21N	-0.8203	2658.75	15.1596	13.0484	225.912	1103.18	3.09896	0	0	-93.1332	-2.89269	0	1.24212	TRUE	1	0
966	(1E)-1-Ethoxy-4,4,5,5,6,6,6-heptafluorohex-1-en-3-one		CAS_RN: 170118-61-3	CCOC=CC(=O)C(F)(F)C(F)(F)C(F)(F)F	CCOC=CC(=O)C(F)(F)C(F)(F)C(F)(F)F	C8H7F7O2	-3.9054	690.13	2.3811	11.5842	174.808	1198.04	2.35409	0	-2.68678	5.3693	-0.0644691	0	1.70622	FALSE	0	0
967	1-Ethoxy-4,4,5,5,6,6,6-heptafluorohex-1-en-3-one		CAS_RN: 184783-37-7	CCOC=CC(=O)C(F)(F)C(F)(F)C(F)(F)F	CCOC=CC(=O)C(F)(F)C(F)(F)C(F)(F)F	C8H7F7O2	-3.9054	690.13	2.3811	11.5842	174.808	1198.04	2.35409	0	-2.68678	5.3693	-0.0644691	0	1.70622	FALSE	0	0
968	3,3,4,4,5,5,6,6,6-Nonafluoro-2-hydroxy-N,N~2~-dimethylnorleucinamide		CAS_RN: 107070-94-0	CNC(=O)C(O)(NC)C(F)(F)C(F)(F)C(F)(F)C(F)(F)F	CNC(=O)C(O)(NC)C(F)(F)C(F)(F)C(F)(F)C(F)(F)F	C8H9F9N2O2	-0.2885	1241.56	5.67624	12.3045	159.968	1539.02	2.59904	9.1272	-2.34014	-16.8581	0	0	1.17941	TRUE	1	0
969	2,2,3,5,6-Pentafluoro-5-(pentafluoroethoxy)-3,6-bis(trifluoromethyl)-1,4-dioxane		CAS_RN: 84041-66-7	FC(F)(F)C(F)(F)OC1(F)OC(F)(C(F)(F)F)C(F)(F)OC1(F)C(F)(F)F	FC(F)(F)C(F)(F)OC1(F)OC(F)(C(F)(F)F)C(F)(F)OC1(F)C(F)(F)F	C8F16O3	-3.2363	1467.31	10.0752	12.7975	242.715	18.3111	2.74409	0	0	-3.0544	0	0	1.38213	FALSE	0	0
970	6:2 Fluorotelomer phosphate monoester		CAS_RN: 57678-01-0	O=P(O)(OCCC(F)(F)C(F)(F)C(F)(F)C(F)(F)C(F)(F)C(F)(F)F)O	O=P(O)(O)OCCC(F)(F)C(F)(F)C(F)(F)C(F)(F)C(F)(F)C(F)(F)F	C8H6F13O4P	0.2051	1537.76	7.47342	12.4644	189.88	182.369	2.72105	8.1902	0	-39.6472	-2.80806	2	0.973803	TRUE	1	0
971	2-Propenoic acid, 2-[methyl[(undecafluoropentyl)sulfonyl]amino]ethyl ester		CAS_RN: 67584-56-9	CN(CCOC(=O)C=C)S(=O)(=O)C(F)(F)C(F)(F)C(F)(F)C(F)(F)C(F)(F)F	C=CC(=O)OCCN(C)S(=O)(=O)C(F)(F)C(F)(F)C(F)(F)C(F)(F)C(F)(F)F	C11H10F11NO4S	-3.7291	1517.1	5.67624	12.5202	180.013	672.216	2.93529	0	-1.22035	-17.4649	-1.30041	0	1.42885	FALSE	0	0
972	n:2 fluorotelomer betaine, n=3		NA	C[N+](CC(O)=O)(C)CCC(F)(F)C(F)(F)C(F)(F)C(F)(F)C(F)(F)C(F)(F)F	C[N+](C)(CCC(F)(F)C(F)(F)C(F)(F)C(F)(F)C(F)(F)C(F)(F)F)CC(=O)O	C12H12F13NO2	-3.0815	1589.46	7.47342	12.5212	160.207	1040.61	2.89045	8.4798	-1.65115	-15.4939	-2.42704	1	1.18955	TRUE	1	0
973	N-(Perfluoro-1-oxobutyl)aspartic acid 1-ethyl ester		CAS_RN: 88435-83-0	CCOC(=O)C(CC(O)=O)NC(=O)C(F)(F)C(F)(F)C(F)(F)F	CCOC(=O)C(CC(=O)O)NC(=O)C(F)(F)C(F)(F)C(F)(F)F	C10H10F7NO5	-1.3362	855.11	2.3811	11.8449	190.028	1095.55	2.79659	8.4311	-3.16747	4.7461	-1.36285	1	1.03668	TRUE	1	0
974	2,3,3,3-Tetrafluoro-2-(trifluoromethoxy)propionyl fluoride		CAS_RN: 2927-83-5	FC(=O)C(F)(OC(F)(F)F)C(F)(F)F	O=C(F)C(F)(OC(F)(F)F)C(F)(F)F	C4F8O2	-4.1743	670.75	1.65096	11.3446	180.781	-27.3697	1.58175	0	-3.9284	8.3676	0	0	1.85453	FALSE	0	0
975	3,4-Bis(2,2,3,3,4,4,4-heptafluorobutyl)-1H-pyrrole-2,5-dicarboxylic acid		CAS_RN: 83650-67-3	OC(=O)c1Nc(C(O)=O)c(CC(F)(F)C(F)(F)C(F)(F)F)c1CC(F)(F)C(F)(F)C(F)(F)F	O=C(O)c1[nH]c(C(=O)O)c(CC(F)(F)C(F)(F)C(F)(F)F)c1CC(F)(F)C(F)(F)C(F)(F)F	C14H7F14NO4	3.08	1299.94	4.29096	12.6399	207.992	194.239	3.21217	8.8377	-2.62891	45.8213	-3.18658	2	1.21225	TRUE	1	0
976	3,4,5,5,6,6,7,7,8,8,9,9,10,10,10-Pentadecafluorodec-3-en-2-one		CAS_RN: 92604-91-6	CC(=O)C(F)=C(F)C(F)(F)C(F)(F)C(F)(F)C(F)(F)C(F)(F)C(F)(F)F	CC(=O)C(F)=C(F)C(F)(F)C(F)(F)C(F)(F)C(F)(F)C(F)(F)C(F)(F)F	C10H3F15O	-1.087	1759.63	7.47342	12.5674	230.746	293.348	2.69386	0	-4.37426	-71.9367	0	0	1.18703	TRUE	1	0
977	Trichloro[3-[1,2,2,2-tetrafluoro-1-(trifluoromethyl)ethoxy]propyl]silane		CAS_RN: 15538-93-9	FC(F)(F)C(F)(OCCC[Si](Cl)(Cl)Cl)C(F)(F)F	FC(F)(F)C(F)(OCCC[Si](Cl)(Cl)Cl)C(F)(F)F	C6H6Cl3F7OSi	14.1661	715.9	2.3811	11.5553	180.277	-444.045	2.95146	0	0	55.2283	-0.813665	0	2.97003	FALSE	0	0
978	2,2,3,3,4,4,5,5,5-Nonafluoro-N-[(4-sulfamoylphenyl)methyl]pentanamide		CAS_RN: 165618-98-4	NS(=O)(=O)c1ccc(CNC(=O)C(F)(F)C(F)(F)C(F)(F)C(F)(F)F)cc1	NS(=O)(=O)c1ccc(CNC(=O)C(F)(F)C(F)(F)C(F)(F)C(F)(F)F)cc1	C12H9F9N2O3S	2.9911	1126.35	3.96541	12.2544	173.123	591.056	2.8153	0	-3.08153	34.584	-0.990492	0	1.42243	FALSE	0	0
979	1H,1H-Tridecafluoro-1-iodoheptane		CAS_RN: 212563-43-4	FC(F)(F)C(F)(F)C(F)(F)C(F)(F)C(F)(F)C(F)(F)CI	FC(F)(F)C(F)(F)C(F)(F)C(F)(F)C(F)(F)C(F)(F)CI	C7H2F13I	-1.09	1363.18	7.47342	12.3785	233.288	-259.37	2.54429	0	0	-54.4676	-1.96132	0	1.21248	TRUE	1	0
980	1,1,1,2,3,3,3-Heptafluoropropan-2-yl benzoate		CAS_RN: 57024-21-2	FC(F)(F)C(F)(OC(=O)c1ccccc1)C(F)(F)F	O=C(OC(F)(C(F)(F)F)C(F)(F)F)c1ccccc1	C10H5F7O2	-1.4029	835.33	2.3811	11.7601	233.742	944.811	2.48376	0	-2.07153	74.1324	0	0	1.50127	FALSE	0	0
981	Imidazolidine, 2-heptafluoropropyl-		CAS_RN: 31185-53-2	FC(F)(F)C(F)(F)C(F)(F)C1NCCN1	FC(F)(F)C(F)(F)C(F)(F)C1NCCN1	C6H7F7N2	-0.0355	619.75	2.3811	11.711	151.176	1343.86	2.17777	0	0	-3.8148	-0.0890934	0	1.64435	FALSE	0	0
982	1-Pentanesulfonamide, N-ethyl-1,1,2,2,3,3,4,4,5,5,5-undecafluoro-N-(2-hydroxyethyl)-		CAS_RN: 68555-72-6	CCN(CCO)S(=O)(=O)C(F)(F)C(F)(F)C(F)(F)C(F)(F)C(F)(F)F	CCN(CCO)S(=O)(=O)C(F)(F)C(F)(F)C(F)(F)C(F)(F)C(F)(F)F	C9H10F11NO3S	-1.6844	1473.34	5.67624	12.5179	169.5	1674.2	2.92807	8.4637	0	-26.4957	-1.2618	0	1.19676	TRUE	1	0
983	1-Ethoxy-1,1,2,3,3,3-hexafluoro-2-(trifluoromethyl)propane--1-ethoxy-1,1,2,2,3,3,4,4,4-nonafluorobutane (1/1)		CAS_RN: 813458-04-7	CCOC(F)(F)C(F)(F)C(F)(F)C(F)(F)F.CCOC(F)(F)C(F)(C(F)(F)F)C(F)(F)F	CCOC(F)(F)C(F)(C(F)(F)F)C(F)(F)F	C6H5F9O	-4.4737	1600.5	4.24264	11.9179	173.352	980.617	1.93023	0	0	19.508	-1.21743	0	1.73904	FALSE	0	0
984	5,5,6,6,7,7,8,8,8-Nonafluoro-2-methyloct-2-ene		CAS_RN: 97294-02-5	CC(C)=CCC(F)(F)C(F)(F)C(F)(F)C(F)(F)F	CC(C)=CCC(F)(F)C(F)(F)C(F)(F)C(F)(F)F	C9H9F9	-2.121	867.88	3.96541	11.8599	158.733	745.279	2.33355	0	0.0840741	7.7953	-1.90873	0	1.60589	FALSE	0	0
985	1-((3-(Dimethylamino)propyl)amino)-3-(perfluoro-7-methyloctyl)propan-2-ol		CAS_RN: 73353-26-1	C(NCCCN(C)C)C(O)CC(F)(F)C(F)(F)C(F)(F)C(F)(F)C(F)(F)C(F)(F)C(F)(C(F)(F)F)C(F)(F)F	CN(C)CCCNCC(O)CC(F)(F)C(F)(F)C(F)(F)C(F)(F)C(F)(F)C(F)(F)C(F)(C(F)(F)F)C(F)(F)F	C17H19F19N2O	-1.5754	3109.85	13.7028	13.0196	172.223	2849.81	3.21821	9.3137	0	-13.9009	-2.9797	0	1.5412	FALSE	0	0
986	(Perfluorohexadecyl)ethyl iodide		CAS_RN: 65150-94-9	C(I)CC(F)(F)C(F)(F)C(F)(F)C(F)(F)C(F)(F)C(F)(F)C(F)(F)C(F)(F)C(F)(F)C(F)(F)C(F)(F)C(F)(F)C(F)(F)C(F)(F)C(F)(F)C(F)(F)F	FC(F)(F)C(F)(F)C(F)(F)C(F)(F)C(F)(F)C(F)(F)C(F)(F)C(F)(F)C(F)(F)C(F)(F)C(F)(F)C(F)(F)C(F)(F)C(F)(F)C(F)(F)C(F)(F)CCI	C18H4F33I	-0.4813	4399.18	27.4082	13.5807	238.265	-2789.23	3.55621	0	0	-168.41	-2.75193	0	1.91639	FALSE	0	0
987	1,1,1,2,2,3,3-Heptafluorododecane		CAS_RN: 69125-78-6	CCCCCCCCCC(F)(F)C(F)(F)C(F)(F)F	CCCCCCCCCC(F)(F)C(F)(F)C(F)(F)F	C12H19F7	-2.113	625.63	2.3811	11.4308	121.309	2158.13	2.58492	0	0	27.0126	-1.43721	0	2.03208	FALSE	0	0
988	multiple ether-substituted perfluoroalkyl (linear) caborxylic acids, n=2		CAS_RN: 39492-89-2	FC(F)(F)OC(F)(F)OC(F)(F)C(O)=O	O=C(O)C(F)(F)OC(F)(F)OC(F)(F)F	C4HF7O4	-2.769	849.81	1.19055	11.1468	240.238	-53.3452	1.58175	7.5578	-3.18708	32.8183	0	1	1.45242	FALSE	0	0
989	(1r,4r)-4-(Nonafluorobutyl)cyclohexane-1-carboxamide		CAS_RN: 88951-21-7	NC(=O)[C@H]1CC[C@@H](CC1)C(F)(F)C(F)(F)C(F)(F)C(F)(F)F	NC(=O)[C@H]1CC[C@H](C(F)(F)C(F)(F)C(F)(F)C(F)(F)F)CC1	C11H12F9NO	2.187	1033.97	3.96541	12.1836	141.736	1869.88	2.75013	0	-0.86653	42.4234	-0.801455	0	1.69039	FALSE	0	0
990	(1s,4s)-4-(Nonafluorobutyl)cyclohexane-1-carboxamide		CAS_RN: 88951-20-6	NC(=O)[C@H]1CC[C@H](CC1)C(F)(F)C(F)(F)C(F)(F)C(F)(F)F	NC(=O)[C@H]1CC[C@@H](C(F)(F)C(F)(F)C(F)(F)C(F)(F)F)CC1	C11H12F9NO	2.187	1033.97	3.96541	12.1836	141.736	1869.88	2.75013	0	-0.86653	42.4234	-0.801455	0	1.69039	FALSE	0	0
991	Calcium (3E)-6,6,7,7,8,8,8-heptafluoro-2,2-dimethyl-5-oxooct-3-en-3-olate (3Z)-6,6,7,7,8,8,8-heptafluoro-2,2-dimethyl-5-oxooct-3-en-3-olate (1/1/1)|1,1,1,2,2,3,3-heptafluoro-6-hydroxy-7,7-dimethyloct-5-en-4-one|Silver, (6,6,7,7,8,8,8-heptafluoro-2,2-dimethyl-3,5-octanedionato-?O3,?O5)-|1,1,1,2,2,3,3-Heptafluoro-6-hydroxy-7,7-dimethyloct-5-en-4-one--copper (2/1)|Lead, bis(6,6,7,7,8,8,8-heptafluoro…		CAS_RN: 124053-49-2|62773-05-1|76121-99-8|38926-19-1|21600-78-2|17631-68-4|17978-75-5|17978-76-6|17978-77-7|18323-96-1|18323-97-2|18323-98-3|172424-98-5|19106-89-9|19186-73-3|80289-21-0	CC(C)(/C(O)=C/C(C(F)(C(F)(C(F)(F)F)F)F)=O)C	CC(C)(C)/C(O)=C/C(=O)C(F)(F)C(F)(F)C(F)(F)F	C10H11F7O2	-0.486	808.73	2.40685	11.795	156.15	534.57	2.36546	9.1688	-2.81736	39.3053	0	0	1.35369	TRUE	1	0
992	1,1,1,2,2,3,3-heptafluoro-6-hydroxy-7,7-dimethyloct-5-en-4-one		CAS_RN: 62773-05-1	CC(C)(C)C(O)=CC(=O)C(F)(F)C(F)(F)C(F)(F)F	CC(C)(C)C(O)=CC(=O)C(F)(F)C(F)(F)C(F)(F)F	C10H11F7O2	-0.486	808.73	2.40685	11.795	156.15	534.57	2.36546	9.1688	-2.81736	39.3053	0	0	1.35369	TRUE	1	0
993	1-[bromo(difluoro)methoxy]-1,1,2,2-tetrafluoro-2-(trifluoromethoxy)ethane		CAS_RN: 87136-78-5	FC(F)(F)OC(F)(F)C(F)(F)OC(F)(F)Br	FC(F)(F)OC(F)(F)C(F)(F)OC(F)(F)Br	C4BrF9O2	-4.8078	757.12	2.52506	11.4376	224.66	-166.796	1.58175	0	0	-3.9087	0	0	1.82099	FALSE	0	0
994	ether-substituted perfluoroalkyl (linear) caborxylic acids_ii, n=13		NA	FC(F)(F)OC(F)(F)C(F)(F)C(F)(F)C(F)(F)C(F)(F)C(F)(F)C(F)(F)C(F)(F)C(F)(F)C(F)(F)C(F)(F)C(F)(F)C(F)(F)C(O)=O	O=C(O)C(F)(F)C(F)(F)C(F)(F)C(F)(F)C(F)(F)C(F)(F)C(F)(F)C(F)(F)C(F)(F)C(F)(F)C(F)(F)C(F)(F)C(F)(F)OC(F)(F)F	C15HF29O3	0.0587	3996.25	22.6021	13.4252	238.734	51.3881	3.35354	7.6566	-4.76784	-149.911	0	1	0.980008	TRUE	1	0
995	(3,3,4,4,5,5,6,6,7,7,8,8,9,9,10,10,10-Heptadecafluorodecyl)propanedioic acid		CAS_RN: 36390-05-3	OC(=O)C(CCC(F)(F)C(F)(F)C(F)(F)C(F)(F)C(F)(F)C(F)(F)C(F)(F)C(F)(F)F)C(O)=O	O=C(O)C(CCC(F)(F)C(F)(F)C(F)(F)C(F)(F)C(F)(F)C(F)(F)C(F)(F)C(F)(F)F)C(=O)O	C13H7F17O4	1.6527	2306.42	11.2406	12.8495	197.243	1379.11	3.05374	8.3438	-2.57939	-35.2502	-3.12935	2	0.997407	TRUE	1	0
996	Perfluoro-3,6,9-trioxatridecanoic acid		CAS_RN: 330562-41-9	OC(=O)C(F)(F)OC(F)(F)C(F)(F)OC(F)(F)C(F)(F)OC(F)(F)C(F)(F)C(F)(F)C(F)(F)F	O=C(O)C(F)(F)OC(F)(F)C(F)(F)OC(F)(F)C(F)(F)OC(F)(F)C(F)(F)C(F)(F)C(F)(F)F	C10HF19O5	-1.8115	1805.06	9.74429	12.6687	227.24	114.505	2.91031	7.681	-3.83716	-65.1021	0	1	0.696241	TRUE	1	0
997	Methyl 4,4,5,5,6,6,6-heptafluoro-3-oxohexanoate		CAS_RN: 89129-68-0	COC(=O)CC(=O)C(F)(F)C(F)(F)C(F)(F)F	COC(=O)CC(=O)C(F)(F)C(F)(F)C(F)(F)F	C7H5F7O3	-3.8509	753.33	2.3811	11.6375	173.481	244.327	2.39352	0	-2.86882	4.2561	-1.87979	0	1.66399	FALSE	0	0
998	3-Perfluorohexyl-2-hydroxypropyl acrylate		CAS_RN: 127377-12-2	OC(COC(=O)C=C)CC(F)(F)C(F)(F)C(F)(F)C(F)(F)C(F)(F)C(F)(F)F	C=CC(=O)OCC(O)CC(F)(F)C(F)(F)C(F)(F)C(F)(F)C(F)(F)C(F)(F)F	C12H9F13O3	-0.9723	1612.92	7.47342	12.4857	193.551	1311.49	2.84482	8.9648	-1.42055	-23.9789	-2.86738	0	1.03376	TRUE	1	0
999	1-Bromo-4-[(1,1,1,2,3,3,3-heptafluoropropan-2-yl)oxy]butane		CAS_RN: 37027-49-9	FC(F)(F)C(F)(OCCCCBr)C(F)(F)F	FC(F)(F)C(F)(OCCCCBr)C(F)(F)F	C7H8BrF7O	-4.0209	719.1	2.3811	11.4428	150.989	431.459	2.31685	0	0	47.6761	-0.889815	0	1.88054	FALSE	0	0
1000	N-Cyclohexyl-2,2,3,3,4,4,5,5,6,6,7,7,7-tridecafluoroheptanamide		CAS_RN: 73602-45-6	FC(F)(F)C(F)(F)C(F)(F)C(F)(F)C(F)(F)C(F)(F)C(=O)NC1CCCCC1	O=C(NC1CCCCC1)C(F)(F)C(F)(F)C(F)(F)C(F)(F)C(F)(F)C(F)(F)F	C13H12F13NO	0.0911	1619.58	7.47342	12.5728	183.58	3393.6	2.81425	0	-3.19889	1.2914	-0.049515	0	1.7029	FALSE	0	0
1001	1-Methyl-3-octyl-1H-imidazolium perfluorobutanesulfonate		CAS_RN: 905972-83-0	CCCCCCCCN1C[NH+](C)C=C1.[O-]S(=O)(=O)C(F)(F)C(F)(F)C(F)(F)C(F)(F)F	CCCCCCCCN1C=CN(C)C1	C12H24N2	-5.1061	143.5	0	10.3018	110.921	-345.586	2.48013	0	0	10.9705	1.07833	0	2.46348	FALSE	0	0
1002	Tetradecanoic acid, 1,1'-(methyl(3,3,4,4,5,5,6,6,6-nonafluorohexyl)silylene) ester		CAS_RN: 94094-26-5	CCCCCCCCCCCCC(C(O)=O)[Si](C)(CCC(F)(F)C(F)(F)C(F)(F)C(F)(F)F)C(CCCCCCCCCCCC)C(O)=O	CCCCCCCCCCCCC(C(=O)O)[Si](C)(CCC(F)(F)C(F)(F)C(F)(F)C(F)(F)F)C(CCCCCCCCCCCC)C(=O)O	C35H61F9O4Si	4.4066	1433.8	3.96541	12.499	138.423	3729.07	3.45592	10.2164	-1.46063	47.9201	-2.15252	2	2.0622	FALSE	0	0
1003	2,4-Dimethoxy-5-(nonafluorobutyl)pyrimidine		CAS_RN: 71623-69-3	COc1ncc(c(OC)n1)C(F)(F)C(F)(F)C(F)(F)C(F)(F)F	COc1ncc(C(F)(F)C(F)(F)C(F)(F)C(F)(F)F)c(OC)n1	C10H7F9N2O2	-4.6341	1052.96	3.96541	12.2777	214.567	700.82	2.73189	0	0	5.9663	0	0	1.59179	FALSE	0	0
1004	Perfluoro dimethylethylpentane		CAS_RN: 50285-18-2	FC(F)(F)C(F)(F)C(F)(C(F)(C(F)(F)F)C(F)(F)F)C(F)(C(F)(F)F)C(F)(F)F	FC(F)(F)C(F)(F)C(F)(C(F)(C(F)(F)F)C(F)(F)F)C(F)(C(F)(F)F)C(F)(F)F	C9F20	-0.8987	2884.5	16.0827	13.1178	228.662	-82.3212	2.96062	0	0	11.56	0	0	1.21101	TRUE	1	0
1005	N-ethyl perfluorohexanesulfonamido polyethylene glycol, n=6, m=3		NA	OCCOCCOCCOCCN(CC)S(=O)(=O)C(F)(F)C(F)(F)C(F)(F)C(F)(F)C(F)(F)C(F)(F)F	CCN(CCOCCOCCOCCO)S(=O)(=O)C(F)(F)C(F)(F)C(F)(F)C(F)(F)C(F)(F)C(F)(F)F	C16H22F13NO6S	-3.593	1855.59	7.47342	12.7336	154.201	2994.85	3.21255	8.4604	0	-27.4863	-1.20718	0	1.69197	FALSE	0	0
1006	N-2-Pyridinylperfluoro-2-(2-propoxypropoxy)propanamide		CAS_RN: 31339-60-3	FC(F)(F)C(F)(F)C(F)(F)OC(F)(C(F)(F)F)C(F)(F)OC(F)(C(=O)NC1=CC=CC=N1)C(F)(F)F	O=C(Nc1ccccn1)C(F)(OC(F)(F)C(F)(OC(F)(F)C(F)(F)C(F)(F)F)C(F)(F)F)C(F)(F)F	C14H5F17N2O3	-1.7682	1776.44	9.19158	12.7404	236.847	1100.43	3.16991	0	-3.55067	34.5874	0	0	1.33377	TRUE	1	0
1007	Diethyl(3-(((heptadecafluoroisooctyl)sulphonyl)amino)propyl)methylammonium iodide		CAS_RN: 93894-72-5	[I-].CC[N+](C)(CC)CCCNS(=O)(=O)C(F)(F)C(F)(F)C(F)(F)C(F)(F)C(F)(F)C(F)(C(F)(F)F)C(F)(F)F	CC[N+](C)(CC)CCCNS(=O)(=O)C(F)(F)C(F)(F)C(F)(F)C(F)(F)C(F)(F)C(F)(C(F)(F)F)C(F)(F)F	C16H20F17N2O2S	-2.619	2989.35	11.7549	13.0284	144.234	3485.91	3.21821	0	0	-2.6392	-1.20231	0	1.98052	FALSE	0	0
1008	N-ethyl perfluorooctanesulfonamido polyethylene glycol, n=8, m=11		NA	OCCOCCOCCOCCOCCOCCOCCOCCOCCOCCOCCOCCN(CC)S(=O)(=O)C(F)(F)C(F)(F)C(F)(F)C(F)(F)C(F)(F)C(F)(F)C(F)(F)C(F)(F)F	CCN(CCOCCOCCOCCOCCOCCOCCOCCOCCOCCOCCOCCO)S(=O)(=O)C(F)(F)C(F)(F)C(F)(F)C(F)(F)C(F)(F)C(F)(F)C(F)(F)C(F)(F)F	C34H54F17NO14S	-5.2143	2680.72	11.2406	13.0672	138.069	4828.72	3.45415	8.5688	0	-42.2931	-1.39645	0	2.39697	FALSE	0	0
1009	2,3,4,4,4-Pentafluoro-2-(1,1,1,2,3,3,3-heptafluoropropan-2-yl)-3-(trifluoromethyl)butanoic acid		CAS_RN: 1882109-61-6	OC(=O)C(F)(C(F)(C(F)(F)F)C(F)(F)F)C(F)(C(F)(F)F)C(F)(F)F	O=C(O)C(F)(C(F)(C(F)(F)F)C(F)(F)F)C(F)(C(F)(F)F)C(F)(F)F	C8HF15O2	1.2039	2593.75	10.3829	12.8442	212.14	-73.5279	2.62941	7.9021	-4.98444	28.6468	0	1	0.897881	TRUE	1	0
1010	1,8-Dichloroperfluorooctane		CAS_RN: 647-25-6	FC(F)(Cl)C(F)(F)C(F)(F)C(F)(F)C(F)(F)C(F)(F)C(F)(F)C(F)(F)Cl	FC(F)(Cl)C(F)(F)C(F)(F)C(F)(F)C(F)(F)C(F)(F)C(F)(F)C(F)(F)Cl	C8Cl2F16	-0.7508	1788.68	11.2406	12.7263	251.366	-71.6842	2.74082	0	0	-115.952	0	0	1.16734	TRUE	1	0
1011	5-Bromo-1,1,1,2,2,3,3-heptafluoropentane		CAS_RN: 355-94-2	FC(F)(F)C(F)(F)C(F)(F)CCBr	FC(F)(F)C(F)(F)C(F)(F)CCBr	C5H4BrF7	-2.3839	533.24	2.3811	11.3356	169.132	-1180.46	1.58175	0	0	-1.0458	-1.38269	0	1.81847	FALSE	0	0
1012	1-Butanesulfonamide, 1,1,2,2,3,3,4,4,4-nonafluoro-N-methyl-		CAS_RN: 68298-12-4	CN[S](=O)(=O)C(F)(F)C(F)(F)C(F)(F)C(F)(F)F	CNS(=O)(=O)C(F)(F)C(F)(F)C(F)(F)C(F)(F)F	C5H4F9NO2S	-0.9141	1077.72	3.96541	12.1183	187.439	179.131	2.39936	0	0	-31.9746	0	0	1.31259	TRUE	1	0
1013	1,1,2,2,3,3,4,4,5,5,6,6-Dodecafluoro-1-[(1,1,1,2,3,3,3-heptafluoropropan-2-yl)oxy]-8-iodooctane		CAS_RN: 25080-25-5	FC(F)(F)C(F)(OC(F)(F)C(F)(F)C(F)(F)C(F)(F)C(F)(F)C(F)(F)CCI)C(F)(F)F	FC(F)(F)C(F)(OC(F)(F)C(F)(F)C(F)(F)C(F)(F)C(F)(F)C(F)(F)CCI)C(F)(F)F	C11H4F19IO	-1.7091	2184.62	12.0195	12.8379	230.279	-2765.85	3.21821	0	0	-36.921	-2.33622	0	1.69689	FALSE	0	0
1014	1,1,2,2,3,3-Hexafluoro-1-(trifluoromethoxy)propane		CAS_RN: 67490-36-2	FC(F)C(F)(F)C(F)(F)OC(F)(F)F	FC(F)C(F)(F)C(F)(F)OC(F)(F)F	C4HF9O	-4.7794	767.17	1.65096	11.3103	212.178	-50.8488	1.58175	0	0	-20.7352	0	0	1.82617	FALSE	0	0
1015	3-(Perfluoro-1-propyl)-1,2-propanediol		CAS_RN: 1992-91-2	OCC(O)CC(F)(F)C(F)(F)C(F)(F)F	OCC(O)CC(F)(F)C(F)(F)C(F)(F)F	C6H7F7O2	1.3601	669.88	2.3811	11.4651	143.722	778.963	1.90885	8.3919	0	6.0646	-2.17062	0	1.54724	FALSE	0	0
1016	2-[(6-chloro-1,1,2,2,3,3,4,4,5,5,6,6-dodecafluorohexyl)oxy]-1,1,2,2-tetrafluoroethanesulfonate	6:2Cl-PFESA	CAS_RN: 756426-58-1	FC(F)(Cl)C(F)(F)C(F)(F)C(F)(F)C(F)(F)C(F)(F)OC(F)(F)C(F)(S(=O)(O)=O)F	O=S(=O)(O)C(F)(F)C(F)(F)OC(F)(F)C(F)(F)C(F)(F)C(F)(F)C(F)(F)C(F)(F)Cl	C8HClF16O4S	-0.1259	1977.49	9.9794	12.7705	245.142	158.247	2.93915	7.8979	0	-94.8039	0	1	0.58174	TRUE	1	1
1017	3,3,4,4,5,5,6,6,6-Nonafluorohexyl thiocyanate		CAS_RN: 26650-08-8	FC(F)(F)C(F)(F)C(F)(F)C(F)(F)CCSC#N	N#CSCCC(F)(F)C(F)(F)C(F)(F)C(F)(F)F	C7H4F9NS	-0.5222	851.06	3.96541	11.8384	197.766	297.469	2.43163	0	0	-6.7772	-1.85056	0	1.34559	TRUE	1	0
1018	Phenyl(tridecafluorohexyl)iodanium trifluoromethanesulfonate		CAS_RN: 77758-84-0	[O-]S(=O)(=O)C(F)(F)F.FC(F)(F)C(F)(F)C(F)(F)C(F)(F)C(F)(F)C(F)(F)[I+]C1=CC=CC=C1	FC(F)(F)C(F)(F)C(F)(F)C(F)(F)C(F)(F)C(F)(F)[I+]c1ccccc1	C12H5F13I	1.9579	1414.93	7.47342	12.5077	244.065	-2734.47	2.76778	0	0	5.4985	0	0	1.705	FALSE	0	0
1019	4,4,5,5,6,6,7,7,8,8,9,9,10,10,11,11,11-Heptadecafluoroundecyl prop-2-enoate		CAS_RN: 1652-60-4	FC(F)(F)C(F)(F)C(F)(F)C(F)(F)C(F)(F)C(F)(F)C(F)(F)C(F)(F)CCCOC(=O)C=C	C=CC(=O)OCCCC(F)(F)C(F)(F)C(F)(F)C(F)(F)C(F)(F)C(F)(F)C(F)(F)C(F)(F)F	C14H9F17O2	-1.9329	2109.08	11.2406	12.8016	200.438	2077.69	3.06121	0	-1.38018	-50.1868	-2.65598	0	1.38957	FALSE	0	0
1020	Potassium N-ethyl-N-[(tridecafluorohexyl)sulphonyl]glycinate		CAS_RN: 67584-53-6	[K+].CCN(CC(=O)[O-])S(=O)(=O)C(F)(F)C(F)(F)C(F)(F)C(F)(F)C(F)(F)C(F)(F)F	CCN(CC(=O)O)S(=O)(=O)C(F)(F)C(F)(F)C(F)(F)C(F)(F)C(F)(F)C(F)(F)F	C10H8F13NO4S	-1.2717	1783.23	7.47342	12.7203	191.342	705.329	3.04889	8.3251	-2.28682	-41.3498	-2.02624	1	0.686258	TRUE	1	0
1021	Perfluoro-1,2-dimethylcyclohexane		CAS_RN: 306-98-9	FC(F)(F)C1(F)C(F)(F)C(F)(F)C(F)(F)C(F)(F)C1(F)C(F)(F)F	FC(F)(F)C1(F)C(F)(F)C(F)(F)C(F)(F)C(F)(F)C1(F)C(F)(F)F	C8F16	0	2539.13	14.4651	13.1577	196.021	-113.922	2.42304	0	0	-25.3176	0	0	1.16648	TRUE	1	0
1022	Ethenyl 3,3,4,4,5,5,6,6,7,7,8,8,8-tridecafluorooctyl carbonate		CAS_RN: 96383-57-2	FC(F)(F)C(F)(F)C(F)(F)C(F)(F)C(F)(F)C(F)(F)CCOC(=O)OC=C	C=COC(=O)OCCC(F)(F)C(F)(F)C(F)(F)C(F)(F)C(F)(F)C(F)(F)F	C11H7F13O3	-3.509	1556.75	7.47342	12.4469	198.087	1193.64	2.8982	0	-1.87055	-38.4433	-2.65724	0	1.43141	FALSE	0	0
1023	N-Butyl-2,2,3,3,4,4,5,5,6,6,7,7,7-tridecafluoroheptanamide		CAS_RN: 570420-18-7	CCCCNC(=O)C(F)(F)C(F)(F)C(F)(F)C(F)(F)C(F)(F)C(F)(F)F	CCCCNC(=O)C(F)(F)C(F)(F)C(F)(F)C(F)(F)C(F)(F)C(F)(F)F	C11H10F13NO	-1.323	1587.58	7.47342	12.4999	186.909	3008.55	2.78789	0	-3.24838	-31.8917	-0.80389	0	1.58655	FALSE	0	0
1024	Bromotris(3,3,4,4,5,5,6,6,6-nonafluorohexyl)stannane		CAS_RN: 240497-37-4	FC(F)(F)C(F)(F)C(F)(F)C(F)(F)CC[Sn](Br)(CCC(F)(F)C(F)(F)C(F)(F)C(F)(F)F)CCC(F)(F)C(F)(F)C(F)(F)C(F)(F)F	FC(F)(F)C(F)(F)C(F)(F)C(F)(F)CC[Sn](Br)(CCC(F)(F)C(F)(F)C(F)(F)C(F)(F)F)CCC(F)(F)C(F)(F)C(F)(F)C(F)(F)F	C18H12BrF27Sn	8.4613	2521.75	12.0658	13.0365	206.199	-13207.4	3.45466	0	0	76.7264	-3.14679	0	5.62108	FALSE	0	0
1025	Methyl 2,2,3,3,4,4-hexafluoro-4-[1,2,2-trifluoro-2-[(trifluorovinyl)oxy]-1-(trifluoromethyl)ethoxy]butyrate		CAS_RN: 62361-02-8	O=C(OC)C(F)(F)C(F)(F)C(F)(F)OC(F)(C(F)(F)F)C(F)(F)OC(F)=C(F)F	COC(=O)C(F)(F)C(F)(F)C(F)(F)OC(F)(C(F)(F)F)C(F)(F)OC(F)=C(F)F	C10H3F15O4	-4.1459	1517.94	6.40993	12.4995	226.545	296.636	2.91429	0	-4.00015	-42.0027	0	0	1.4476	FALSE	0	0
1026	1,1,2,4,4-Pentafluoro-3-(trifluoromethyl)buta-1,3-diene		CAS_RN: 384-04-3	FC(F)=C(F)C(=C(F)F)C(F)(F)F	FC(F)=C(F)C(=C(F)F)C(F)(F)F	C5F8	-1.6697	817.33	0	10.9331	177.044	-110.359	1.58175	0	-3.5437	4.719	0	0	1.75611	FALSE	0	0
1027	2,2,3,3,4,4,4-Heptafluorobutane-1,1-diol		CAS_RN: 375-21-3	OC(O)C(F)(F)C(F)(F)C(F)(F)F	OC(O)C(F)(F)C(F)(F)C(F)(F)F	C4H3F7O2	3.457	675.75	2.3811	11.4497	128.21	462.699	1.58175	7.6047	0	-20.1707	0	0	1.73029	FALSE	0	0
1028	N'-[(4-Ethylphenyl)methylidene]-2,2,3,3,4,4,5,5,6,6,7,7,7-tridecafluoroheptanehydrazide		CAS_RN: 445258-05-9	CCc1ccc(C=NNC(=O)C(F)(F)C(F)(F)C(F)(F)C(F)(F)C(F)(F)C(F)(F)F)cc1	CCc1ccc(C=NNC(=O)C(F)(F)C(F)(F)C(F)(F)C(F)(F)C(F)(F)C(F)(F)F)cc1	C16H11F13N2O	0.089	1663.19	7.47342	12.5998	185.633	2123.21	3.03106	0	-3.4771	6.3418	0.571125	0	1.4477	FALSE	0	0
1029	n:2 fluorotelomer thio alkyl amido betaine-related, n=5		NA	FC(F)(F)C(F)(F)C(F)(F)C(F)(F)C(F)(F)C(F)(F)C(F)(F)C(F)(F)C(F)(F)C(F)(F)CCSCC(NCCC[N+](C)(C)CC(O)=O)=O	C[N+](C)(CCCNC(=O)CSCCC(F)(F)C(F)(F)C(F)(F)C(F)(F)C(F)(F)C(F)(F)C(F)(F)C(F)(F)C(F)(F)C(F)(F)F)CC(=O)O	C21H21F21N2O3S	-1.2234	2859.8	15.1596	13.1251	172.234	2537.12	3.42014	8.7492	-1.17393	-33.7699	-2.66149	1	1.26914	TRUE	1	0
1030	2-(Heptafluoropropyl)cyclohexan-1-one		CAS_RN: 61282-91-5	FC(F)(F)C(F)(F)C(F)(F)C1CCCCC1=O	O=C1CCCCC1C(F)(F)C(F)(F)C(F)(F)F	C9H9F7O	0	765.75	2.3811	11.8439	155.752	1521.8	2.44097	0	-1.23132	40.9505	-0.641366	0	1.60056	FALSE	0	0
1031	1-Chlorononafluorobutane		CAS_RN: 558-89-4	FC(F)(F)C(F)(F)C(F)(F)C(F)(F)Cl	FC(F)(F)C(F)(F)C(F)(F)C(F)(F)Cl	C4ClF9	-1.5872	713.21	3.96541	11.6883	217.598	-76.2478	1.58175	0	0	-51.2569	0	0	1.47519	FALSE	0	0
1032	2,3,3,3-Tetrafluoro-N-(pentafluorophenyl)-2-(trifluoromethyl)propanamide		CAS_RN: 105923-37-3	Fc1c(F)c(F)c(NC(=O)C(F)(C(F)(F)F)C(F)(F)F)c(F)c1F	O=C(Nc1c(F)c(F)c(F)c(F)c1F)C(F)(C(F)(F)F)C(F)(F)F	C10HF12NO	1.1861	1505.89	2.3811	12.2386	243.352	59.3698	2.86654	0	-3.74471	-13.129	0	0	1.24767	TRUE	1	0
1033	Ethyl [5-(heptafluoropropyl)-1H-pyrazol-3-yl]acetate		CAS_RN: 1428569-15-6	CCOC(=O)Cc1nNc(c1)C(F)(F)C(F)(F)C(F)(F)F	CCOC(=O)Cc1cc(C(F)(F)C(F)(F)C(F)(F)F)[nH]n1	C10H9F7N2O2	-1.4838	736.94	2.3811	11.9276	180.973	849.961	2.53421	0	-0.887548	5.058	-0.640864	0	1.41032	FALSE	0	0
1034	4-[Methyl[(nonafluorobutyl)sulfonyl]amino]butyl methacrylate		CAS_RN: 67906-39-2	C(N([S](=O)(=O)C(F)(F)C(F)(F)C(F)(F)C(F)(F)F)C)CCCOC(=O)C(=C)C	C=C(C)C(=O)OCCCCN(C)S(=O)(=O)C(F)(F)C(F)(F)C(F)(F)C(F)(F)F	C13H16F9NO4S	-3.5534	1285.14	3.96541	12.3271	171.373	1511.3	2.98354	0	-0.808765	15.8528	-0.882356	0	1.58985	FALSE	0	0
1035	3-[(3,3,4,4,5,5,6,6,6-Nonafluorohexyl)oxy]propanenitrile		CAS_RN: 56300-32-4	FC(F)(F)C(F)(F)C(F)(F)C(F)(F)CCOCCC#N	N#CCCOCCC(F)(F)C(F)(F)C(F)(F)C(F)(F)F	C9H8F9NO	-3.3456	928	3.96541	11.8548	161.373	1119.16	2.52987	0	0	-5.8804	-2.04455	0	1.6757	FALSE	0	0
1036	4'-[2-(2,4-Di-tert-pentylphenoxy)butyramido]perfluoro-2'-hydroxybutyranilide		CAS_RN: 346-10-1	[H]N(C(=O)C(CC)OC1=C(C=C(C=C1)C(C)(C)CC)C(C)(C)CC)C1=CC(O)=C(C=C1)N([H])C(=O)C(F)(F)C(F)(F)C(F)(F)F	CCC(Oc1ccc(C(C)(C)CC)cc1C(C)(C)CC)C(=O)Nc1ccc(NC(=O)C(F)(F)C(F)(F)C(F)(F)F)c(O)c1	C30H37F7N2O4	0.5967	1204.08	1.60328	12.6127	157.27	1349.2	3.36687	10.1257	-2.98564	65.4908	0.224855	0	1.39325	FALSE	0	0
1037	multiple H-substituted, multiple ether-substituted perfluoroalkyl alcohols, n=5, m=6		NA	FC(F)(F)C(F)(F)C(F)(F)C(F)(F)C(F)(F)C(F)(F)C(F)(F)C(F)(F)C(F)(F)C(F)(F)CCOCCOCCOCCOCCOCCO[H]	OCCOCCOCCOCCOCCOCCC(F)(F)C(F)(F)C(F)(F)C(F)(F)C(F)(F)C(F)(F)C(F)(F)C(F)(F)C(F)(F)C(F)(F)F	C22H25F21O6	-3.2574	2806.13	15.1596	13.0807	162.767	3902.16	3.3894	8.4717	0	-67.1776	-2.83946	0	1.9246	FALSE	0	0
1038	3,3,4,4,5,5,6,6,7,7,7-Undecafluoroheptan-1-amine		CAS_RN: 1346521-42-3	NCCC(F)(F)C(F)(F)C(F)(F)C(F)(F)C(F)(F)F	NCCC(F)(F)C(F)(F)C(F)(F)C(F)(F)C(F)(F)F	C7H6F11N	1.2801	1183.81	5.67624	12.1451	176.111	1462.33	2.39069	0	0	-34.075	-2.19095	0	1.40836	FALSE	0	0
1039	1H,1H,11H-Eicosafluoro-1-undecanol		CAS_RN: 307-70-0	C(C(F)(C(C(F)(C(C(F)(C(C(F)(C(C(F)(C(F)F)F)(F)F)F)(F)F)F)(F)F)F)(F)F)F)O	OCC(F)(F)C(F)(F)C(F)(F)C(F)(F)C(F)(F)C(F)(F)C(F)(F)C(F)(F)C(F)(F)C(F)F	C11H4F20O	0.5467	2537.19	13.1851	12.9701	218.192	494.864	2.87647	7.7814	0	-133.619	-3.58088	0	0.986981	TRUE	1	0
1040	1,1,1,2,2,3,3-Heptafluoro-3-{[1,1,1,2,3,3-hexafluoro-3-({1,1,1,2,3,3-hexafluoro-3-[(trifluoroethenyl)oxy]propan-2-yl}oxy)propan-2-yl]oxy}propane		CAS_RN: 2599-84-0	FC(F)=C(F)OC(F)(F)C(F)(OC(F)(F)C(F)(OC(F)(F)C(F)(F)C(F)(F)F)C(F)(F)F)C(F)(F)F	FC(F)=C(F)OC(F)(F)C(F)(OC(F)(F)C(F)(OC(F)(F)C(F)(F)C(F)(F)F)C(F)(F)F)C(F)(F)F	C11F22O3	-3.1779	2120.5	11.2748	12.8233	248.033	16.949	3.16776	0	-4.28414	-45.5935	0	0	1.3719	FALSE	0	0
1041	1-Bromo-4-(tridecafluorohexyl)benzene		CAS_RN: 149068-56-4	FC(F)(F)C(F)(F)C(F)(F)C(F)(F)C(F)(F)C(F)(F)C1=CC=C(Br)C=C1	FC(F)(F)C(F)(F)C(F)(F)C(F)(F)C(F)(F)C(F)(F)c1ccc(Br)cc1	C12H4BrF13	0	1504.86	7.47342	12.5863	225.509	-1280.45	2.8311	0	0	9.4019	0	0	1.33147	TRUE	1	0
1042	3-[(Perfluoroheptane-1-sulfonyl)amino]-N,N-dimethylpropan-1-amine N-oxide potassium salt		CAS_RN: 178094-70-7	[K+].C[N+](C)([O-])CCC[N-]S(=O)(=O)C(F)(F)C(F)(F)C(F)(F)C(F)(F)C(F)(F)C(F)(F)C(F)(F)F	C[N+](C)([O-])CCCNS(=O)(=O)C(F)(F)C(F)(F)C(F)(F)C(F)(F)C(F)(F)C(F)(F)C(F)(F)F	C12H13F15N2O3S	-2.3645	2058.29	9.33326	12.8172	181.838	1938.91	3.1185	0	0	-42.1707	-1.32087	0	1.42934	FALSE	0	0
1043	Cyclopent-1-en-1-yl nonafluorobutane-1-sulfonate		CAS_RN: 36839-94-8	FC(F)(F)C(F)(F)C(F)(F)C(F)(F)S(=O)(=O)OC1=CCCC1	O=S(=O)(OC1=CCCC1)C(F)(F)C(F)(F)C(F)(F)C(F)(F)F	C9H7F9O3S	-1.0931	1103.53	3.96541	12.2785	227.664	2192.53	2.51971	0	-0.664897	14.3567	-0.230279	0	1.46069	FALSE	0	0
1044	2-Amino-5,5,6,6,7,7,7-heptafluoroheptanoic acid		CAS_RN: 10325-10-7	NC(CCC(F)(F)C(F)(F)C(F)(F)F)C(O)=O	NC(CCC(F)(F)C(F)(F)C(F)(F)F)C(=O)O	C7H8F7NO2	2.5976	644.54	2.3811	11.5046	142.29	882.513	2.32643	8.1619	-1.76748	9.1156	-1.97919	1	1.41094	FALSE	0	0
1045	N-ethyl perfluoroheptanesulfonamido polyethylene glycol, n=7, m=6		NA	OCCOCCOCCOCCOCCOCCOCCN(CC)S(=O)(=O)C(F)(F)C(F)(F)C(F)(F)C(F)(F)C(F)(F)C(F)(F)C(F)(F)F	CCN(CCOCCOCCOCCOCCOCCOCCO)S(=O)(=O)C(F)(F)C(F)(F)C(F)(F)C(F)(F)C(F)(F)C(F)(F)C(F)(F)F	C23H34F15NO9S	-4.4202	2239.41	9.33326	12.9066	146.254	3896.18	3.37272	8.5209	0	-34.16	-1.30874	0	2.0297	FALSE	0	0
1046	[4-(1,1,1,2,3,3,3-Heptafluoropropan-2-yl)phenyl]methanol		CAS_RN: 1137162-24-3	OCc1ccc(cc1)C(F)(C(F)(F)F)C(F)(F)F	OCc1ccc(C(F)(C(F)(F)F)C(F)(F)F)cc1	C10H7F7O	2.003	903.08	2.3811	11.8932	153.106	745.054	2.45092	8.6128	0	83.1259	-0.571824	0	1.4779	FALSE	0	0
1047	Sodium 1,1,2,2-tetrafluoro-2-(1,1,2,2,2-pentafluoroethoxy)ethanesulfonate		CAS_RN: 113507-87-2	[Na+].[O-]S(=O)(=O)C(F)(F)C(F)(F)OC(F)(F)C(F)(F)F	O=S(=O)(O)C(F)(F)C(F)(F)OC(F)(F)C(F)(F)F	C4HF9O4S	-0.4707	755.22	2.94168	11.8719	226.291	202.401	1.8131	7.7649	0	-20.4709	0	1	1.01837	TRUE	1	0
1048	p,p'-Bis(undecafluorocyclohexanemethanol) pyrophosphate		CAS_RN: 48240-25-1	C(C1(C(C(C(C(C1(F)F)(F)F)(F)F)(F)F)(F)F)F)OP(=O)(O)OP(=O)(O)OCC2(C(C(C(C(C2(F)F)(F)F)(F)F)(F)F)(F)F)F	O=P(O)(OCC1(F)C(F)(F)C(F)(F)C(F)(F)C(F)(F)C1(F)F)OP(=O)(O)OCC1(F)C(F)(F)C(F)(F)C(F)(F)C(F)(F)C1(F)F	C14H6F22O7P2	-0.1628	3649.85	14.2967	13.5721	204.485	-785.284	3.36405	9.1841	0	-103.251	-4.12106	2	1.28604	TRUE	1	0
1049	1,1'-[(difluoromethylene)bis(oxy)]bis[1,2,2-trifluoroethylene]		CAS_RN: 13845-92-6	FC(F)=C(F)OC(F)(F)OC(F)=C(F)F	FC(F)=C(F)OC(F)(F)OC(F)=C(F)F	C5F8O2	-5.4612	419.78	0	10.7626	224.623	-4.31828	1.58175	0	-3.28853	-18.3332	0	0	2.00945	FALSE	0	0
1050	N-(2,2,3,3,4,4,4-Heptafluorobutanoyl)-2-methylalanine		CAS_RN: 880353-20-8	CC(C)(NC(=O)C(F)(F)C(F)(F)C(F)(F)F)C(O)=O	CC(C)(NC(=O)C(F)(F)C(F)(F)C(F)(F)F)C(=O)O	C8H8F7NO3	-0.0793	817.6	2.7016	11.8336	175.749	430.89	2.42188	8.4492	-3.03961	5.9191	0	1	1.04073	TRUE	1	0
1051	Potassium 4,4,5,5,6,6,7,7,8,8,9,9,10,10,11,11,11-heptadecafluoroundecanoate		CAS_RN: 83310-58-1	[K+].[O-]C(=O)CCC(F)(F)C(F)(F)C(F)(F)C(F)(F)C(F)(F)C(F)(F)C(F)(F)C(F)(F)F	O=C(O)CCC(F)(F)C(F)(F)C(F)(F)C(F)(F)C(F)(F)C(F)(F)C(F)(F)C(F)(F)F	C11H5F17O2	0.4893	2075.5	11.2406	12.7922	213.219	948.047	2.87731	7.984	-2.44238	-62.6219	-2.97056	1	0.649063	TRUE	1	0
1052	2,2-bis(Trifluoromethyl)perfluoropropane		CAS_RN: 374-51-6	FC(F)(F)C(C(F)(F)F)(C(F)(F)F)C(F)(F)F	FC(F)(F)C(C(F)(F)F)(C(F)(F)F)C(F)(F)F	C5F12	-1.6476	3456	6.59754	12.3054	0	-364.911	1.58175	0	0	58.3444	0	0	2.96867	FALSE	0	0
1053	1-Bromo-4-(1,1,1,2,3,3,3-heptafluoropropan-2-yl)-2-methylbenzene		CAS_RN: 353272-53-4	Cc1cc(ccc1Br)C(F)(C(F)(F)F)C(F)(F)F	Cc1cc(C(F)(C(F)(F)F)C(F)(F)F)ccc1Br	C10H6BrF7	0	867.1	2.3811	11.9544	182.107	-644.655	2.56588	0	0	88.9401	0	0	1.58556	FALSE	0	0
1054	2,2,3,3,4,4,4-Heptafluoro-N-(2-phenylethyl)butanamide		CAS_RN: 29723-29-3	FC(F)(F)C(F)(F)C(F)(F)C(=O)NCCC1=CC=CC=C1	O=C(NCCc1ccccc1)C(F)(F)C(F)(F)C(F)(F)F	C12H10F7NO	0.2152	728.32	2.3811	11.7363	158.558	1477.54	2.61918	0	-2.66597	35.4824	-0.493677	0	1.58191	FALSE	0	0
1055	perfluoroalkanesulfonamido quaternary ammonium alcohol sulfonic acid, n=2		NA	S(N(CCCS(O)(=O)=O)CCC[N+](CCO)(C)C)(=O)(=O)C(F)(F)C(F)(F)F	C[N+](C)(CCO)CCCN(CCCS(=O)(=O)O)S(=O)(=O)C(F)(F)C(F)(F)F	C12H23F5N2O6S2	-2.8736	794.31	1	11.9439	131.577	630.716	3.06118	8.913	0	40.3019	-0.840352	1	1.57301	FALSE	0	0
1056	N-Methylperfluoroheptanamide		CAS_RN: 89932-74-1	CNC(=O)C(F)(F)C(F)(F)C(F)(F)C(F)(F)C(F)(F)C(F)(F)F	CNC(=O)C(F)(F)C(F)(F)C(F)(F)C(F)(F)C(F)(F)C(F)(F)F	C8H4F13NO	-0.9169	1554.25	7.47342	12.4738	203.992	980.78	2.56886	0	-3.31176	-64.9978	0	0	1.16172	TRUE	1	0
1057	Bis[4-(1H,1H,2H,2H-perfluorodecyl)phenyl]phenylphosphine		CAS_RN: 892154-91-5	FC(F)(F)C(F)(F)C(F)(F)C(F)(F)C(F)(F)C(F)(F)C(F)(F)C(F)(F)CCC1=CC=C(C=C1)P(C1=CC=CC=C1)C1=CC=C(CCC(F)(F)C(F)(F)C(F)(F)C(F)(F)C(F)(F)C(F)(F)C(F)(F)C(F)(F)F)C=C1	FC(F)(F)C(F)(F)C(F)(F)C(F)(F)C(F)(F)C(F)(F)C(F)(F)C(F)(F)CCc1ccc(P(c2ccccc2)c2ccc(CCC(F)(F)C(F)(F)C(F)(F)C(F)(F)C(F)(F)C(F)(F)C(F)(F)C(F)(F)F)cc2)cc1	C38H21F34P	1.2121	4284.88	15.5548	13.6435	215.51	2890.22	3.72551	0	0	81.0524	-2.81103	0	1.85251	FALSE	0	0
[truncated: 3,732 more rows]

## Sheet: Table S7 NormanPFAS RTpred
ID	Name	Abbr.Name	CAS	SMILES_original	SMILES_MS_ready	Formula	nAcid	AATS5v	AATSC1v	ATS4s	ATSC2i	ATSC3m	MDEC-44	MWC10	SpMax6_Bhm	maxsOH	mindssC	minssCH2	Dataset	RTs_Measured	MLR	SVM
[truncated: 4,789 more rows]

[truncated: 1 more sheets: Table S8 External dataset]
